# Supplementary material for: Synthesis of 3,6-diaryl-1H-pyrazolo[3,4-b]pyridines via one-pot sequential Suzuki–Miyaura coupling
Source: Royal Society of Chemistry journal article supplement (doi:10.1039/c8ra07104g), 2018-01-01

## Supplementary Information

# Synthesis of 3,6 Diaryl-1*H*-Pyrazolo[3,4-*b*]Pyridines via One-pot Sequential Suzuki-Miyaura Coupling

Urvashi,<sup>a</sup> Vibha Tandon,<sup>b,\*</sup> Parthasarathi Das<sup>c,\*</sup> and S. Kukreti<sup>a</sup>

<sup>a</sup> Department of Chemistry, University of Delhi, Delhi-110007, INDIA

<sup>b</sup> Special Centre for Molecular Medicine, Jawahar Lal Nehru University, New Delhi-110067, INDIA

<sup>c</sup> Department of Applied Chemistry, Indian Institute of Technology (Indian School of Mines), Dhanbad, Jharkhand 826004, INDIA

E-mail: vtandon@mail.jnu.ac.in; partha@iitism.ac.in

### Table of Contents

|                                                        |     |
|--------------------------------------------------------|-----|
| 1. X-ray crystal data ( <b>3g</b> and <b>4f</b> )..... | S2  |
| 2. Spectra for all products.....                       | .S7 |

## 1. X-ray crystal data (3g and 4f)

The single crystal X-ray data were collected on an Oxford Xcalibur CCD diffractometer using graphite monochromated MoK $\alpha$ -radiation ( $\lambda = 0.71073 \text{ \AA}$ ) at 293(2) K. The multi-scan correction was applied. The structure was solved by the direct method using SIR-92 and refined by fullmatrix least-square refinement technique on  $F^2$  using SHELXL 97.<sup>2</sup> The hydrogen atoms were placed into the calculated position and included in the last cycle of the refinement. All calculations were done using Win GX software package.<sup>3</sup> The main crystallographic data and structural refinement details are given in Table 1. Atomic coordinates, bond lengths, bond angles, and thermal parameters for compound **3g** and **4f** have been deposited at the Cambridge Crystallographic Data Centre (CCDC, deposit no. 1828970 and 1817412 respectively).

Figure. 1s. Hydrogen bonding in the crystal lattice of (3g).

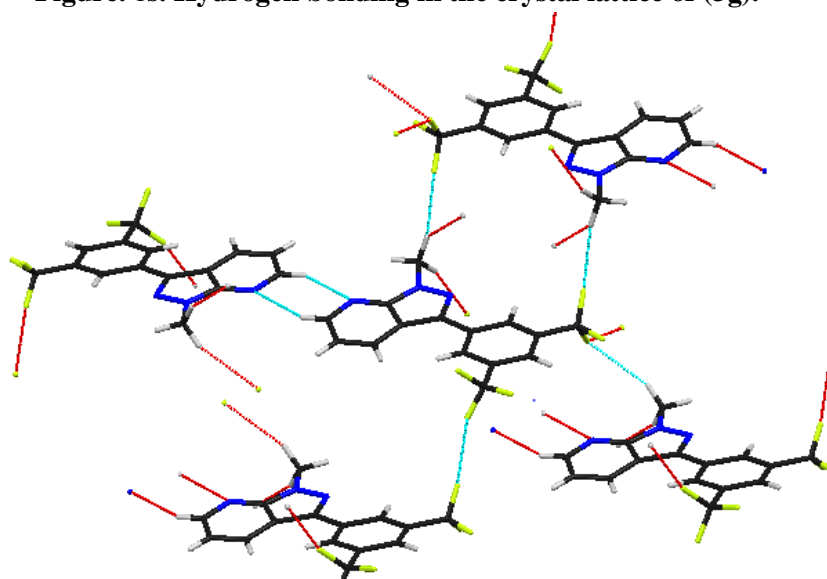

Figure. 2s. X-ray crystallographic ORTEP diagram of compound 3g.

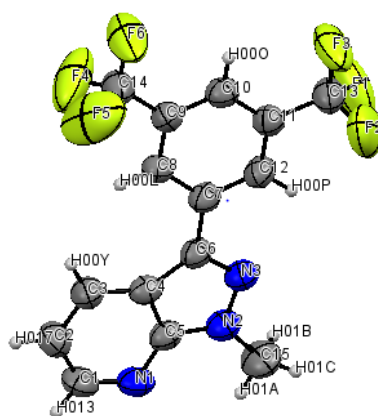

**Table S1. Crystal data and structure refinement for 3g.**

|                                                |                                                              |
|------------------------------------------------|--------------------------------------------------------------|
| Empirical Formula                              | C <sub>15</sub> H <sub>9</sub> F <sub>6</sub> N <sub>3</sub> |
| Formula Weight                                 | 345.25                                                       |
| Temperature                                    | 293(2) K                                                     |
| Wavelength                                     | 0.71073 Å                                                    |
| Crystal system                                 | Triclinic                                                    |
| Space group                                    | <i>P</i> -1                                                  |
| a [Å]                                          | 9.9699(8)                                                    |
| b [Å]                                          | 11.2846(10)                                                  |
| c [Å]                                          | 13.4112(11)                                                  |
| α [°]                                          | 87.684(7)                                                    |
| β [°]                                          | 88.220(7)                                                    |
| λ [°]                                          | 75.359(8)                                                    |
| Volume [Å <sup>3</sup> ]                       | 1458.3(2)                                                    |
| Z                                              | 4                                                            |
| Density (calculated) [Mg/m <sup>3</sup> ]      | 1.573                                                        |
| Absorption coefficient [mm <sup>-1</sup> ]     | 0.150                                                        |
| F(000)                                         | 696                                                          |
| Crystal size [mm <sup>3</sup> ]                | 0.28 x 0.19 x 0.12 mm <sup>3</sup>                           |
| Theta range for data collection [°]            | 3.152 to 25.00                                               |
| Index ranges                                   | -11 ≤ h ≤ 11, -13 ≤ k ≤ 12, -15 ≤ l ≤ 15                     |
| Reflections collected / independent reflection | 16198 / 5119                                                 |
| R(int)                                         | 0.0433                                                       |
| Completeness of Theta at 25 °C (%)             | 99.8                                                         |
| Refinement method                              | Full-matrix least square on F <sup>2</sup>                   |
| Data/ restraints/ parameters                   | 5119/ 0/ 433                                                 |
| Goodness-of-fit on F <sup>2</sup>              | 1.064                                                        |

|                                                 |                                      |
|-------------------------------------------------|--------------------------------------|
| Final R indices $[I > 2\sigma(I)]^{a,b}$        | R1 = 0.1064, wR2 = 0.2881            |
| R indices (all data)                            | R1 = 0.1665, wR2 = 0.3417            |
| Largest diff. peak and hole $[\text{\AA}^{-3}]$ | 0.717 and -0.528 $e.\text{\AA}^{-3}$ |
| Extinction coefficient                          | n/a                                  |

$${}^a R = \sum (||F_o| - |F_c||) / \sum |F_o|; {}^b R_w = \{ \sum [w(F_o^2 - F_c^2)^2] / \sum [w(F_o^2)^2] \}^{1/2}$$

**Figure. 3s. X-ray crystallographic ORTEP diagram of compound 4f.**

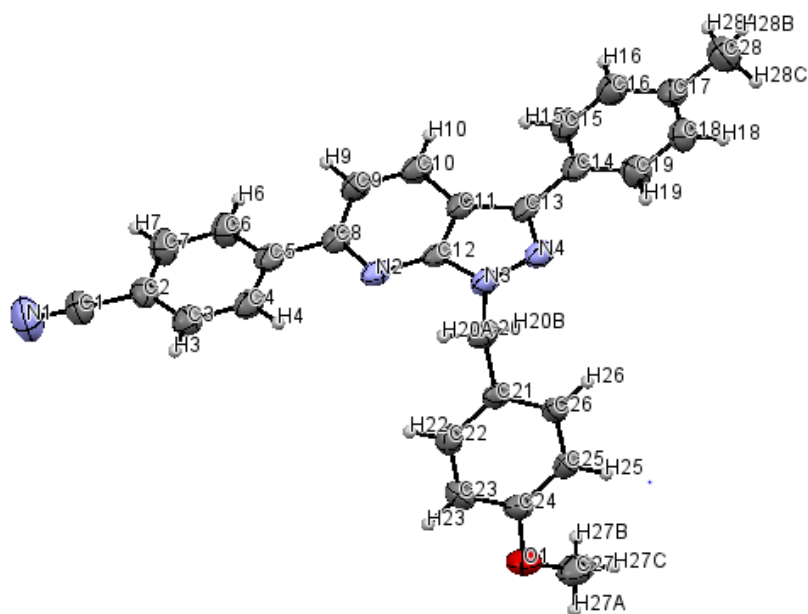

**Figure. 4s. Hydrogen bonding in the crystal lattice of (4f).**

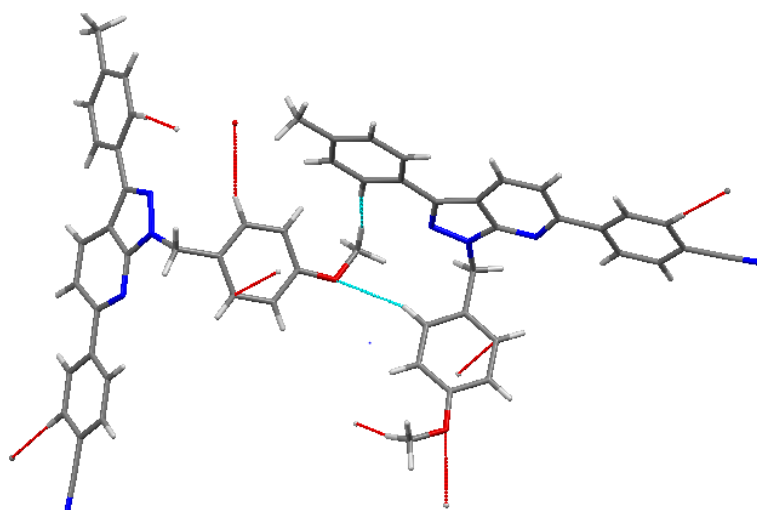

**Table S2. Crystal data and structure refinement for 4f.**

|                                                |                                                               |
|------------------------------------------------|---------------------------------------------------------------|
| Empirical Formula                              | C <sub>28</sub> H <sub>22</sub> N <sub>4</sub> O <sub>1</sub> |
| Formula Weight                                 | 430.49                                                        |
| Temperature                                    | 293(2) K                                                      |
| Wavelength                                     | 0.71073 Å                                                     |
| Crystal system                                 | Monoclinic                                                    |
| Space group                                    | <i>P</i> -21/ <i>c</i>                                        |
| a [Å]                                          | 7.9835(2)                                                     |
| b [Å]                                          | 12.3524(3)                                                    |
| c [Å]                                          | 22.3908(5)                                                    |
| $\alpha$ [°]                                   | 90                                                            |
| $\beta$ [°]                                    | 96.078(2)                                                     |
| $\lambda$ [°]                                  | 90                                                            |
| Volume [Å <sup>3</sup> ]                       | 2195.66(9)                                                    |
| Z                                              | 31                                                            |
| Density (calculated) [Mg/m <sup>3</sup> ]      | 1.840                                                         |
| Absorption coefficient [mm <sup>-1</sup> ]     | 1.048                                                         |
| F(000)                                         | 1209                                                          |
| Crystal size [mm <sup>3</sup> ]                | 0.12 x 0.14 x 0.16 mm <sup>3</sup>                            |
| Theta range for data collection [°]            | 3.415 to 29.550                                               |
| Index ranges                                   | -11 ≤ h ≤ 10, -16 ≤ k ≤ 17, -30 ≤ l ≤ 30                      |
| Reflections collected / independent reflection | 33036 / 5591                                                  |
| R(int)                                         | 0.0322                                                        |
| Completeness of Theta at 25 °C (%)             | 99.7                                                          |
| Refinement method                              | Full-matrix least square on F <sup>2</sup>                    |
| Data/ restraints/ parameters                   | 5591/ 0/ 298                                                  |
| Goodness-of-fit on F <sup>2</sup>              | 1.274                                                         |

|                                                     |                                       |
|-----------------------------------------------------|---------------------------------------|
| Final R indices [ $I > 2\sigma(I)$ ] <sup>a,b</sup> | R1 = 0.0776, wR2 = 0.3004             |
| R indices (all data)                                | R1 = 0.0956, wR2 = 0.3165             |
| Largest diff. peak and hole [ $\text{\AA}^{-3}$ ]   | 0.706 and -0.295 e. $\text{\AA}^{-3}$ |
| Extinction coefficient                              | n/a                                   |

$${}^aR = \sum(|F_o| - |F_c|) / \sum |F_o|; {}^bR_w = \{\sum[w(F_o^2 - F_c^2)^2] / \sum[w(F_o^2)]\}^{1/2}$$

### References:

1. G. M. Sheldrick, *Acta Crystallogr., Sect. A*, **1990**, 46, 467.
2. G. M. Sheldrick, *SHELXL-97, Computer program for crystal structure refinement*, University of Göttingen, Germany. **1997**, 1456.
3. L. J. Farrugia, WinGX Version 1.80.05, *An integrated system of Windows Programs for the Solution, Refinement and Analysis of Single Crystal X-Ray Diffraction Data*; Department of Chemistry, University of Glasgow. **1997-2009**, 32, 837 – 838.

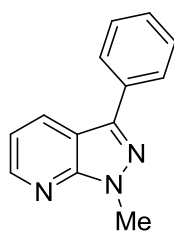

1-methyl-3-phenyl-1*H*-pyrazolo[3,4-*b*]pyridine (**3a**)

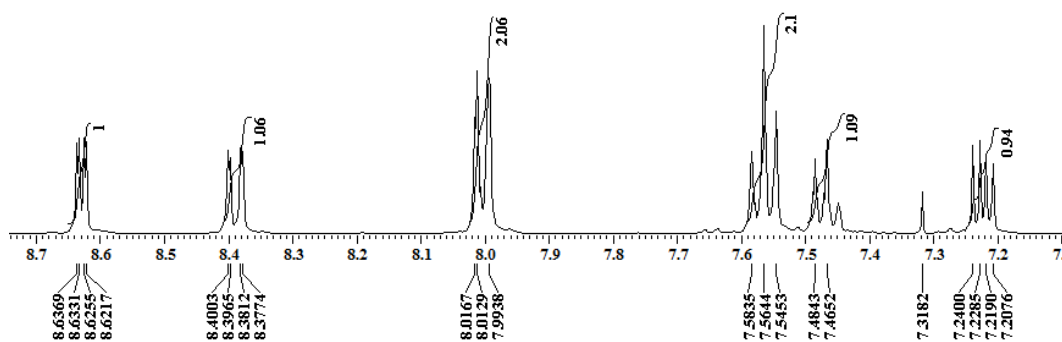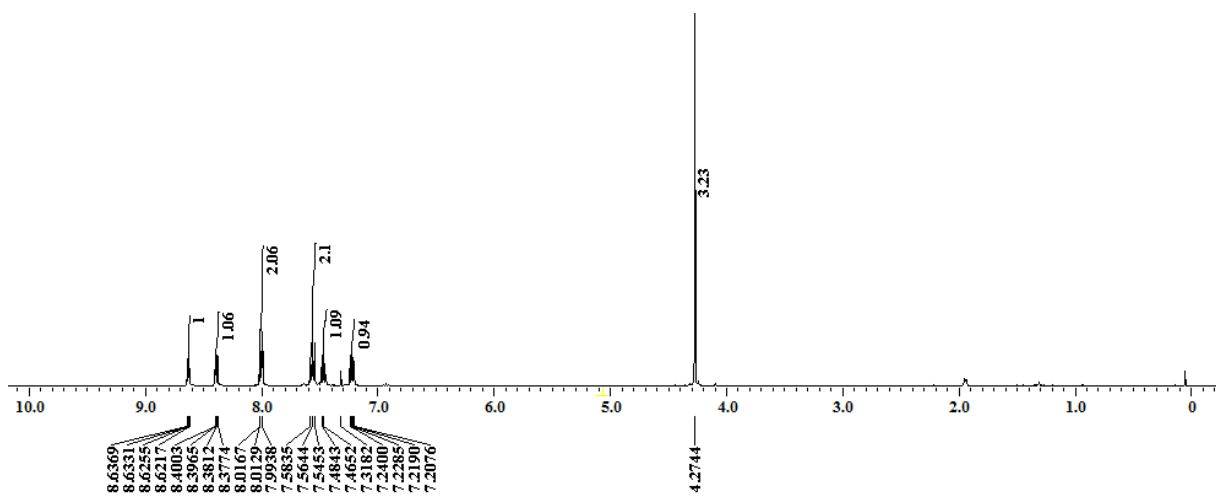

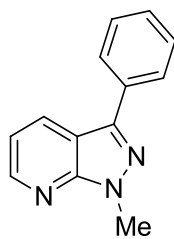

1-methyl-3-phenyl-1*H*-pyrazolo[3,4-*b*]pyridine (**3a**)

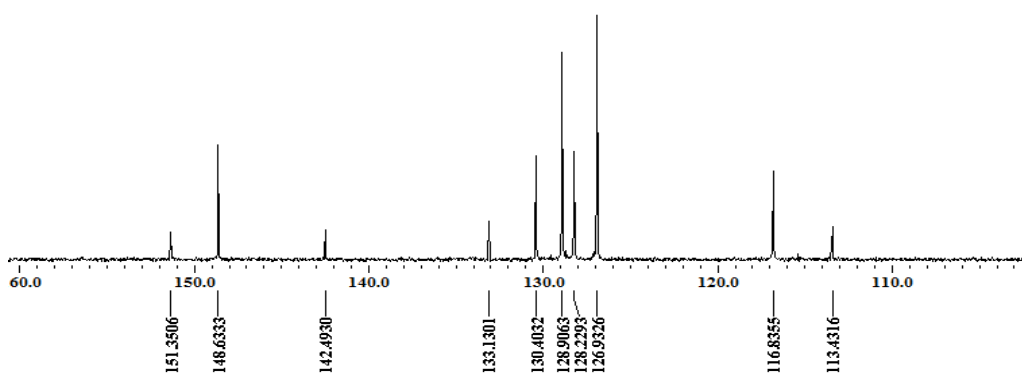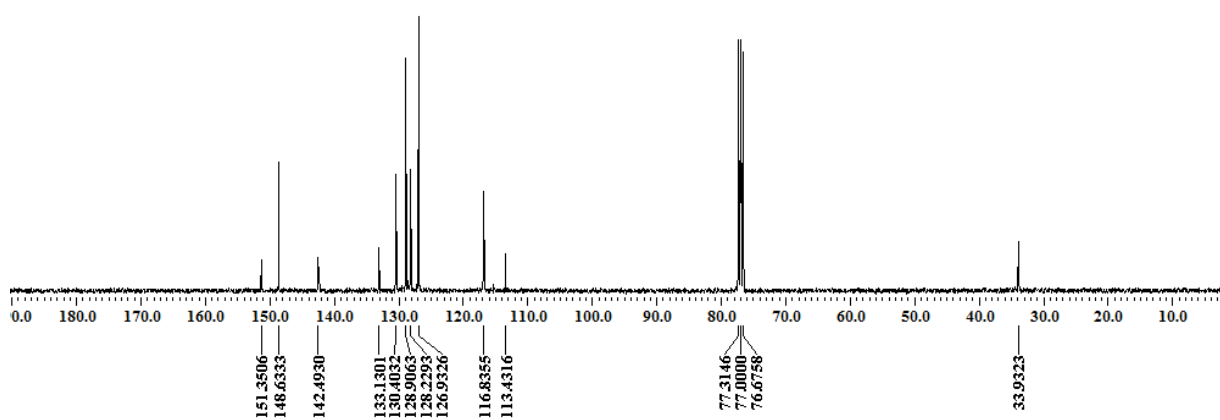



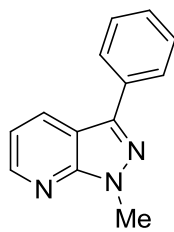

1-methyl-3-phenyl-1*H*-pyrazolo[3,4-*b*]pyridine (**3a**)

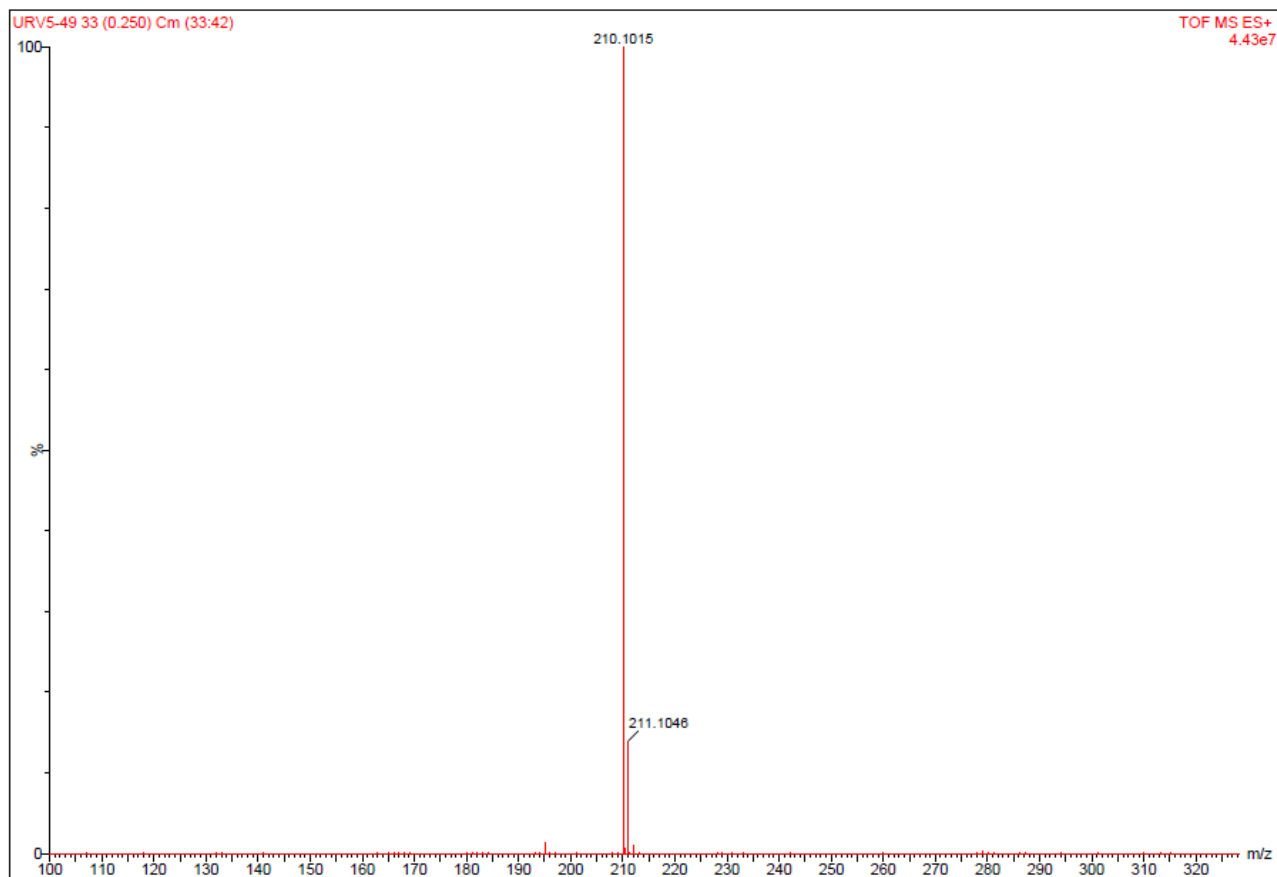

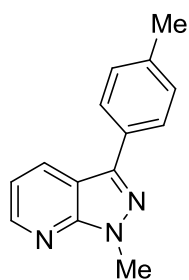

1-methyl-3-(p-tolyl)-1H-pyrazolo[3,4-b]pyridine (**3b**)

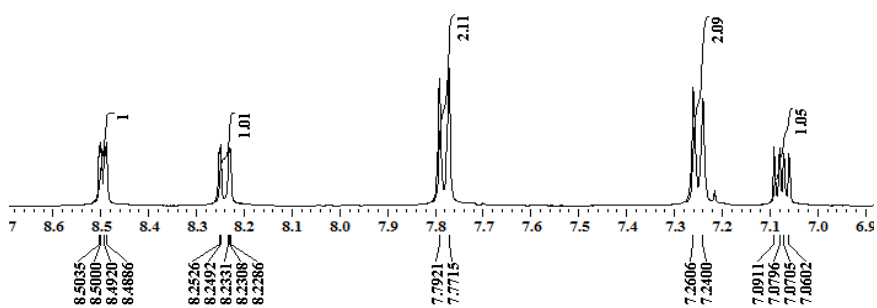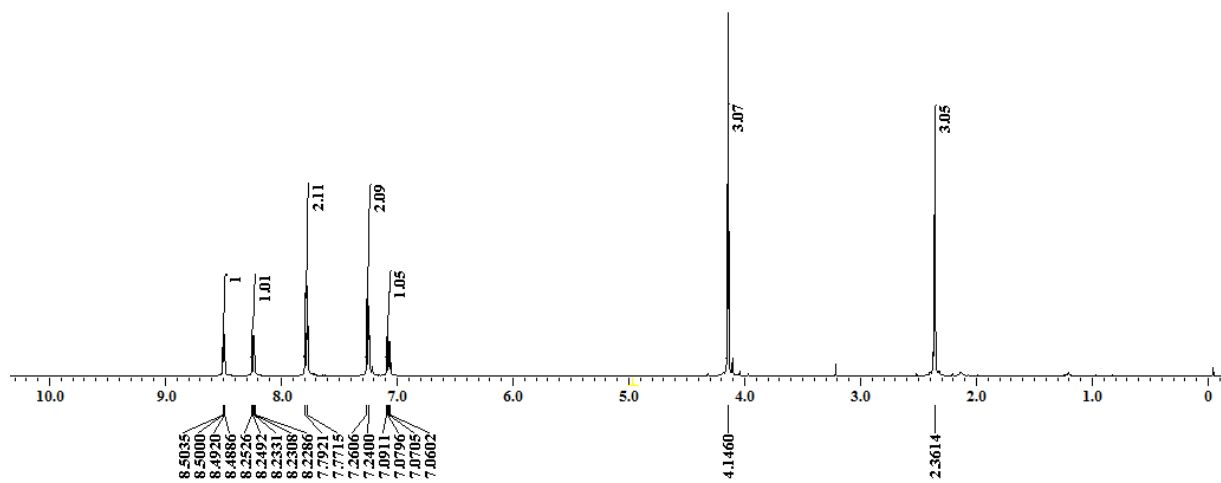

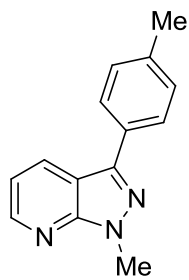

1-methyl-3-(*p*-tolyl)-1*H*-pyrazolo[3,4-*b*]pyridine (3b)

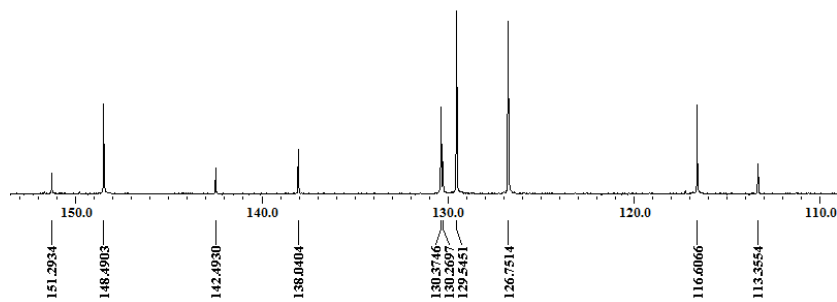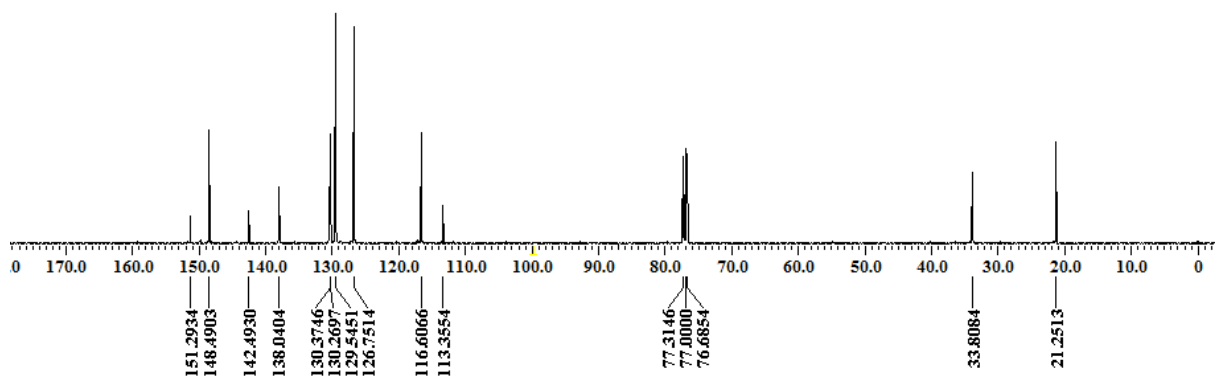

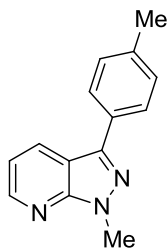

1-methyl-3-(*p*-tolyl)-1*H*-pyrazolo[3,4-*b*]pyridine (**3b**)

## Qualitative Compound Report

|                        |              |               |                     |
|------------------------|--------------|---------------|---------------------|
| Data File              | URV5-64P.d   | Sample Name   | URV5-64P            |
| Sample Type            | Sample       | Position      | P1-A3               |
| Instrument Name        | Instrument 1 | User Name     |                     |
| Acq Method             | 29.10.2014.m | Acquired Time | 21-04-2017 13:59:54 |
| IRM Calibration Status | Success      | DA Method     | Default.m           |
| Comment                |              |               |                     |

|                |                             |       |
|----------------|-----------------------------|-------|
| Sample Group   |                             | Info. |
| Acquisition SW | 6200 series TOF/6500 series |       |
| Version        | Q-TOF B.05.01 (B5125)       |       |

### Compound Table

| Compound Label    | RT | Mass     | Formula    | MFG Formula | MFG Diff (ppm) | DB Formula |
|-------------------|----|----------|------------|-------------|----------------|------------|
| Cpd 1: C14 H13 N3 | 11 | 223.1109 | C14 H13 N3 | C14 H13 N3  | 0.05           | C14 H13 N3 |

| Compound Label    | m/z      | RT | Algorithm                 | Mass     |
|-------------------|----------|----|---------------------------|----------|
| Cpd 1: C14 H13 N3 | 224.1182 | 11 | Find by Molecular Feature | 223.1109 |

### MFE MS Spectrum

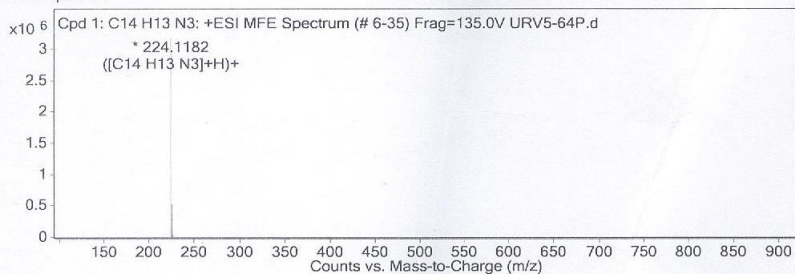

### MFE MS Zoomed Spectrum

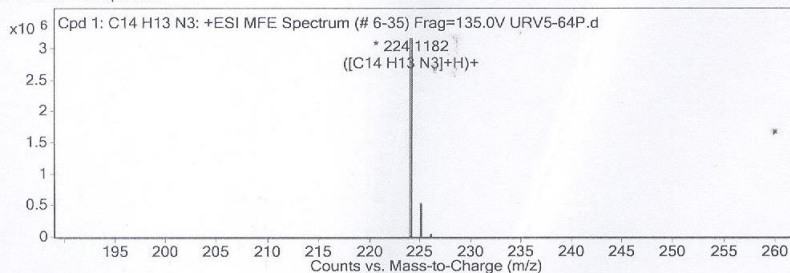

### MS Spectrum Peak List

| m/z      | z | Abund    | Formula    | Ion    |
|----------|---|----------|------------|--------|
| 224.1182 | 1 | 3167287  | C14 H13 N3 | (M+H)+ |
| 225.1212 | 1 | 520245.9 | C14 H13 N3 | (M+H)+ |
| 226.124  | 1 | 38124.61 | C14 H13 N3 | (M+H)+ |
| 227.126  | 1 | 3075.84  | C14 H13 N3 | (M+H)+ |

--- End Of Report ---

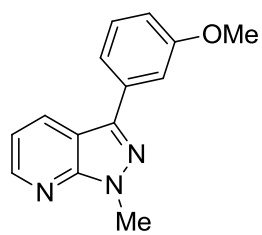

3-(3-methoxyphenyl)-1-methyl-1H-pyrazolo[3,4-b]pyridine (**3c**)

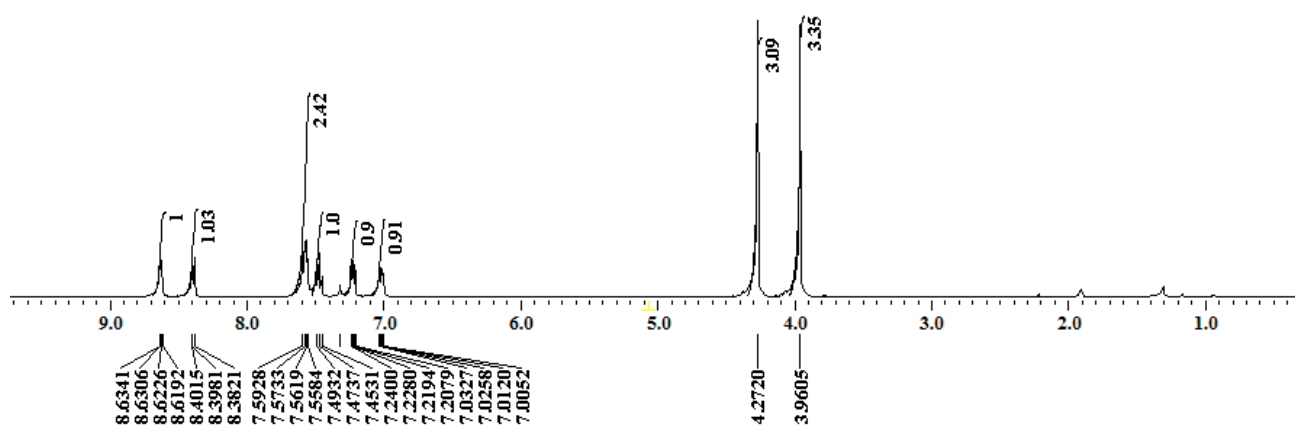



3-(3-methoxyphenyl)-1-methyl-1H-pyrazolo[3,4-b]pyridine (3c)

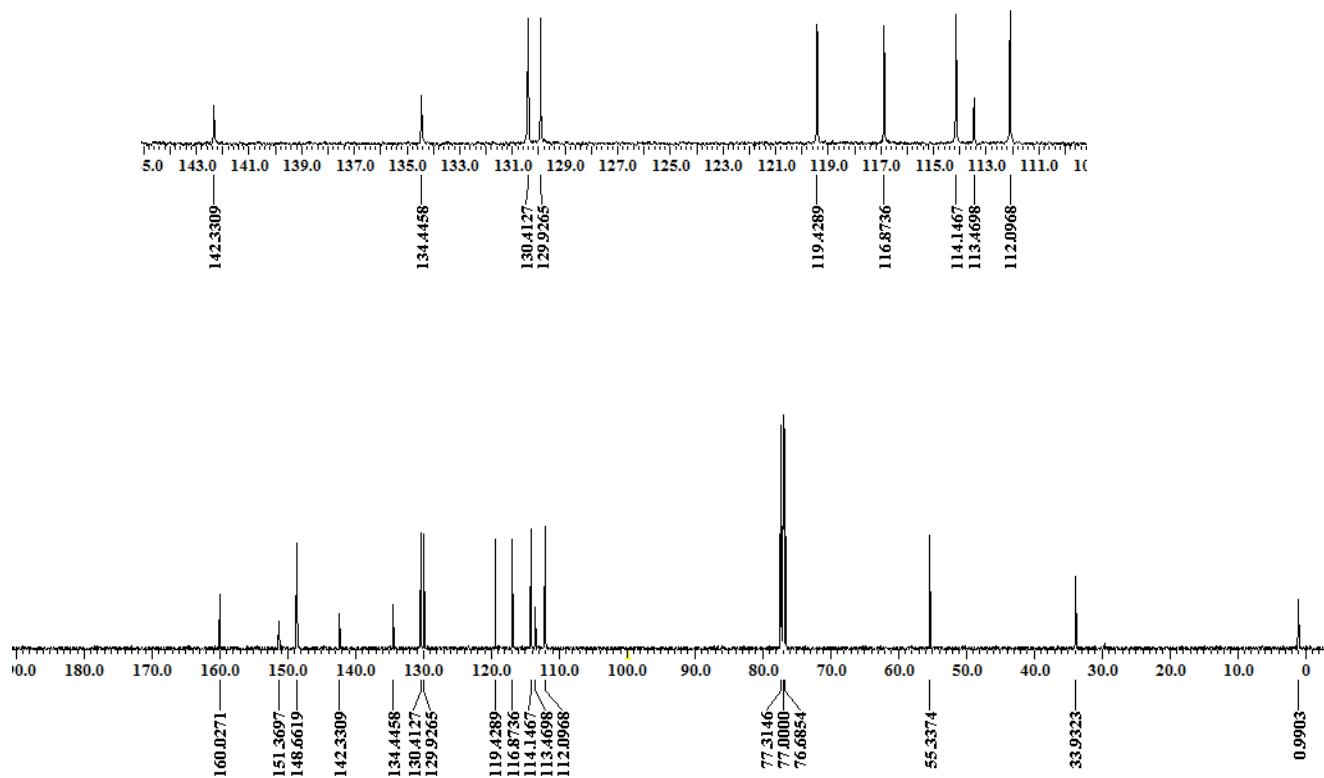

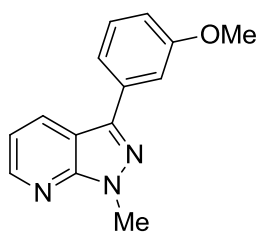

3-(3-methoxyphenyl)-1-methyl-1H-pyrazolo[3,4-b]pyridine (**3c**)

## Qualitative Compound Report

|                               |              |                      |                     |
|-------------------------------|--------------|----------------------|---------------------|
| <b>Data File</b>              | URV5-81.d    | <b>Sample Name</b>   | URV5-81             |
| <b>Sample Type</b>            | Sample       | <b>Position</b>      | P1-C9               |
| <b>Instrument Name</b>        | Instrument 1 | <b>User Name</b>     |                     |
| <b>Acq Method</b>             | 29.10.2014.m | <b>Acquired Time</b> | 03-05-2017 13:48:50 |
| <b>IRM Calibration Status</b> | Success      | <b>DA Method</b>     | Default.m           |
| <b>Comment</b>                |              |                      |                     |

|                       |                             |              |
|-----------------------|-----------------------------|--------------|
| <b>Sample Group</b>   |                             | <b>Info.</b> |
| <b>Acquisition SW</b> | 6200 series TOF/6500 series |              |
| <b>Version</b>        | Q-TOF B.05.01 (B5125)       |              |

### Compound Table

| Compound Label      | RT | Mass     | Formula      | MFG Formula  | MFG Diff (ppm) | DB Formula   |
|---------------------|----|----------|--------------|--------------|----------------|--------------|
| Cpd 3: C14 H13 N3 O | 10 | 239.1066 | C14 H13 N3 O | C14 H13 N3 O | -2.88          | C14 H13 N3 O |

| Compound Label      | m/z      | RT | Algorithm                 | Mass     |
|---------------------|----------|----|---------------------------|----------|
| Cpd 3: C14 H13 N3 O | 240.1138 | 10 | Find by Molecular Feature | 239.1066 |

### MFE MS Spectrum

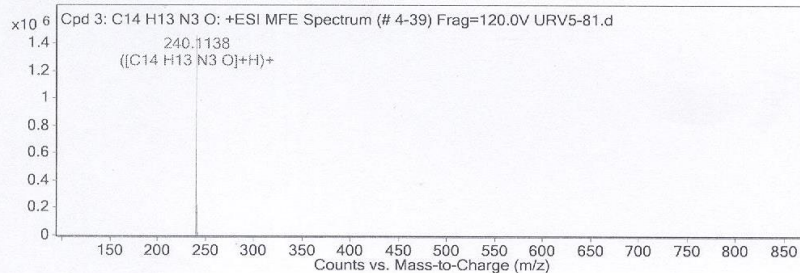

### MFE MS Zoomed Spectrum

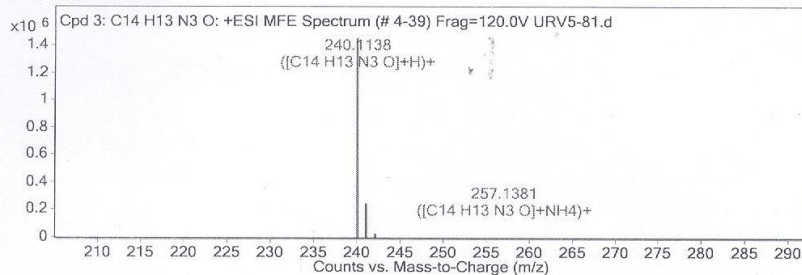

### MS Spectrum Peak List

| m/z      | z | Abund      | Formula      | Ion      |
|----------|---|------------|--------------|----------|
| 240.1138 | 1 | 1462283.75 | C14 H13 N3 O | (M+H)+   |
| 241.1167 | 1 | 226490.51  | C14 H13 N3 O | (M+H)+   |
| 242.1195 | 1 | 20024.68   | C14 H13 N3 O | (M+H)+   |
| 243.1228 | 1 | 1880.09    | C14 H13 N3 O | (M+H)+   |
| 244.1296 | 1 | 239.53     | C14 H13 N3 O | (M+H)+   |
| 257.1381 | 1 | 1279.99    | C14 H13 N3 O | (M+NH4)+ |

--- End Of Report ---

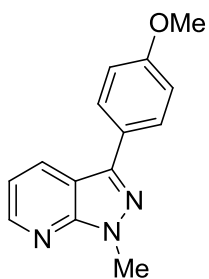

3-(4-methoxyphenyl)-1-methyl-1H-pyrazolo[3,4-b]pyridine (**3d**)

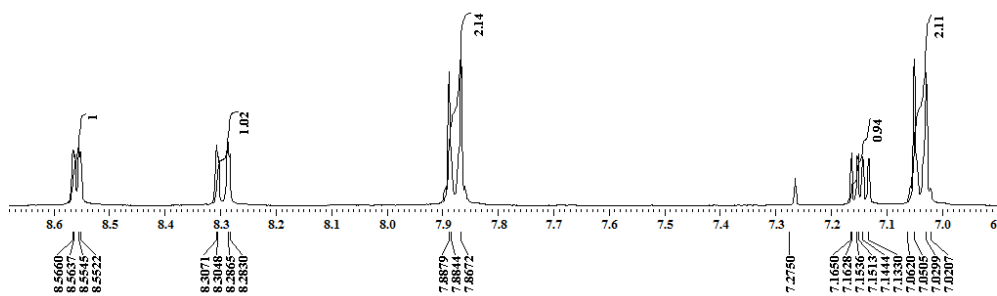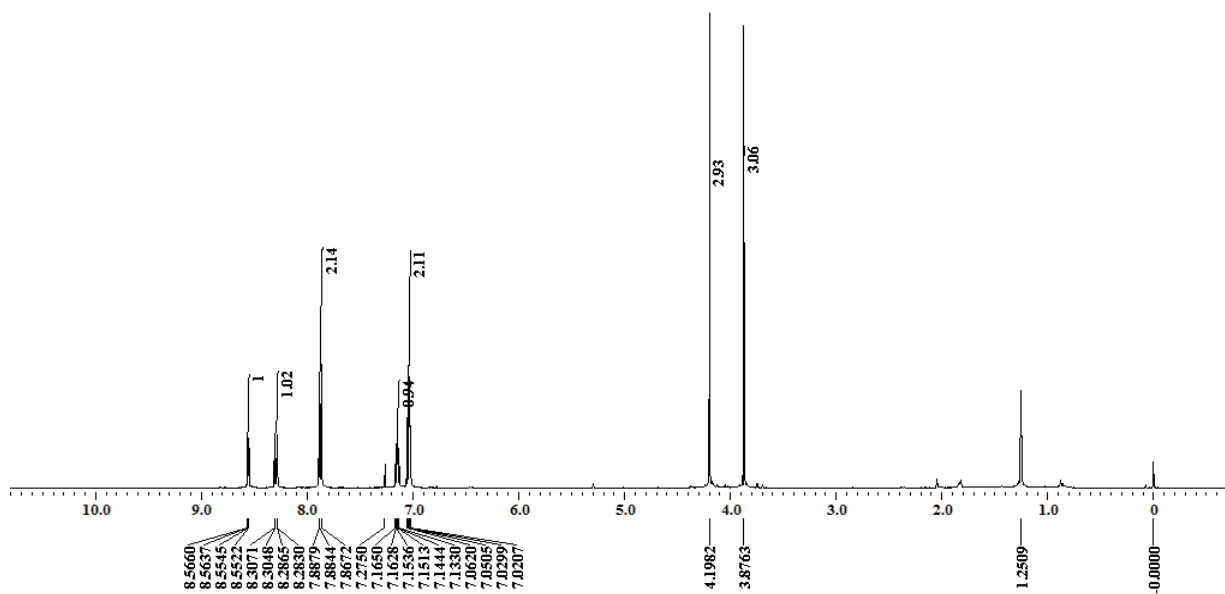



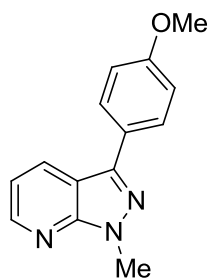

3-(4-methoxyphenyl)-1-methyl-1H-pyrazolo[3,4-b]pyridine (3d)

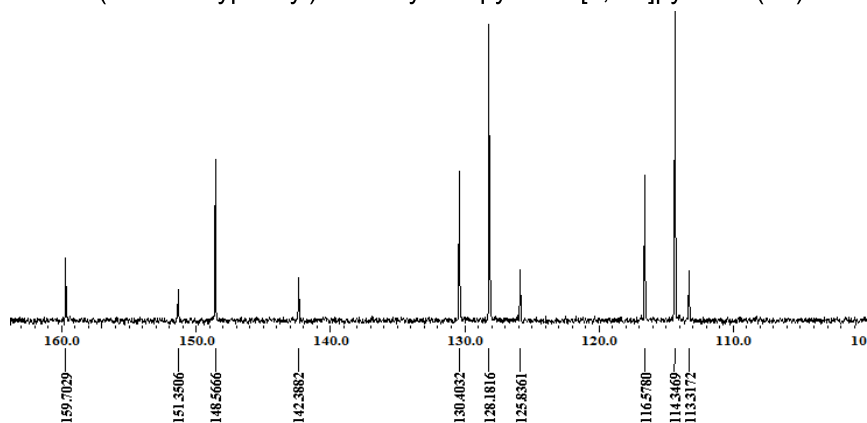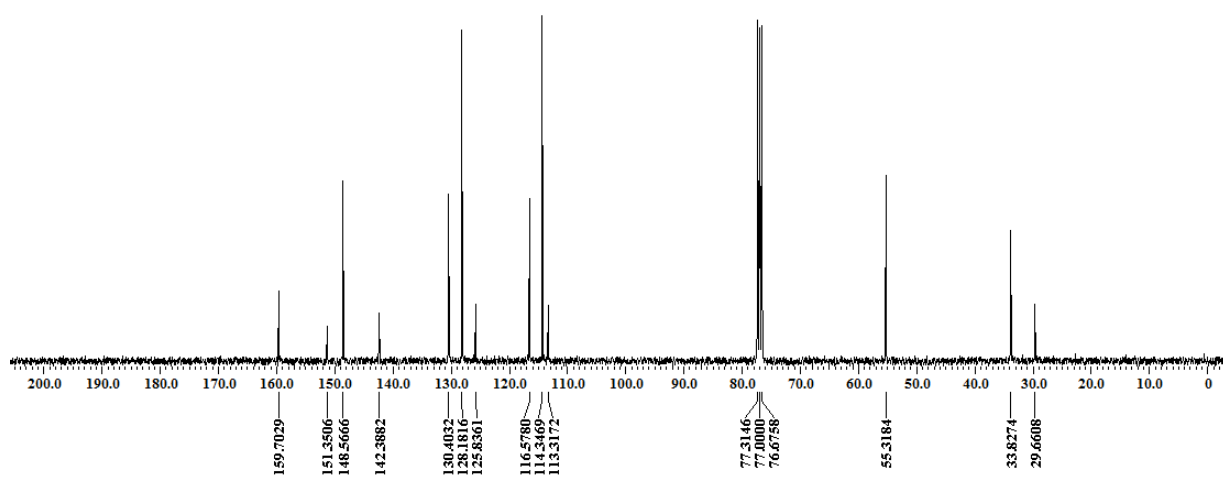

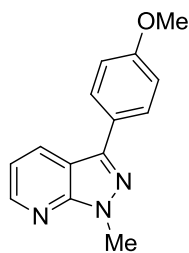

3-(4-methoxyphenyl)-1-methyl-1H-pyrazolo[3,4-b]pyridine (3d)

## Qualitative Compound Report

|                               |              |                      |                     |
|-------------------------------|--------------|----------------------|---------------------|
| <b>Data File</b>              | URV5-84.d    | <b>Sample Name</b>   | URV5-84             |
| <b>Sample Type</b>            | Sample       | <b>Position</b>      | P1-A9               |
| <b>Instrument Name</b>        | Instrument 1 | <b>User Name</b>     |                     |
| <b>Acq Method</b>             | 29.10.2014.m | <b>Acquired Time</b> | 08-05-2017 13:49:49 |
| <b>IRM Calibration Status</b> | Success      | <b>DA Method</b>     | Default.m           |
| <b>Comment</b>                |              |                      |                     |

|                       |                             |              |
|-----------------------|-----------------------------|--------------|
| <b>Sample Group</b>   |                             | <b>Info.</b> |
| <b>Acquisition SW</b> | 6200 series TOF/6500 series |              |
| <b>Version</b>        | Q-TOF B.05.01 (B5125)       |              |

### Compound Table

| Compound Label      | RT | Mass     | Formula      | MFG Formula  | MFG Diff (ppm) | DB Formula   |
|---------------------|----|----------|--------------|--------------|----------------|--------------|
| Cpd 3: C14 H13 N3 O | 11 | 239.1068 | C14 H13 N3 O | C14 H13 N3 O | -3.78          | C14 H13 N3 O |

| Compound Label      | m/z      | RT | Algorithm                 | Mass     |
|---------------------|----------|----|---------------------------|----------|
| Cpd 3: C14 H13 N3 O | 240.1141 | 11 | Find by Molecular Feature | 239.1068 |

### MFE MS Spectrum

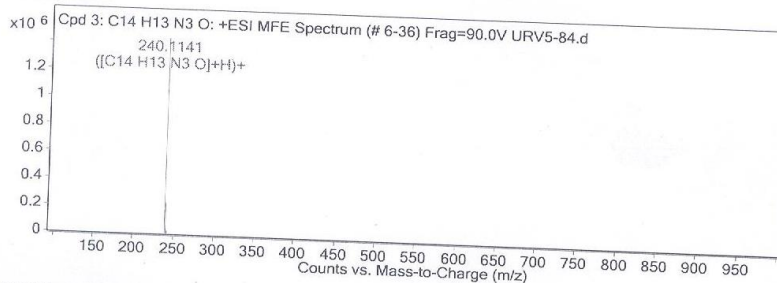

### MFE MS Zoomed Spectrum

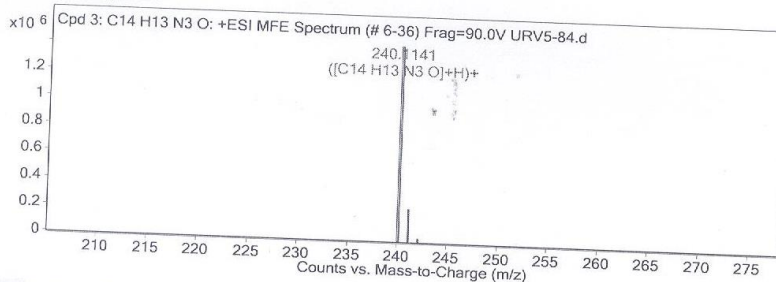

### MS Spectrum Peak List

| m/z      | z | Abund      | Formula      | Ion    |
|----------|---|------------|--------------|--------|
| 240.1141 | 1 | 1435305.88 | C14 H13 N3 O | (M+H)+ |
| 241.1168 | 1 | 228163.1   | C14 H13 N3 O | (M+H)+ |
| 242.1198 | 1 | 19562.13   | C14 H13 N3 O | (M+H)+ |
| 243.1213 | 1 | 1715.49    | C14 H13 N3 O | (M+H)+ |

--- End Of Report ---

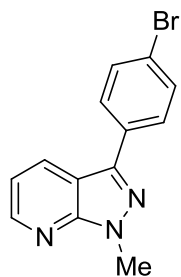

3-(4-bromophenyl)-1-methyl-1H-pyrazolo[3,4-b]pyridine (3e)

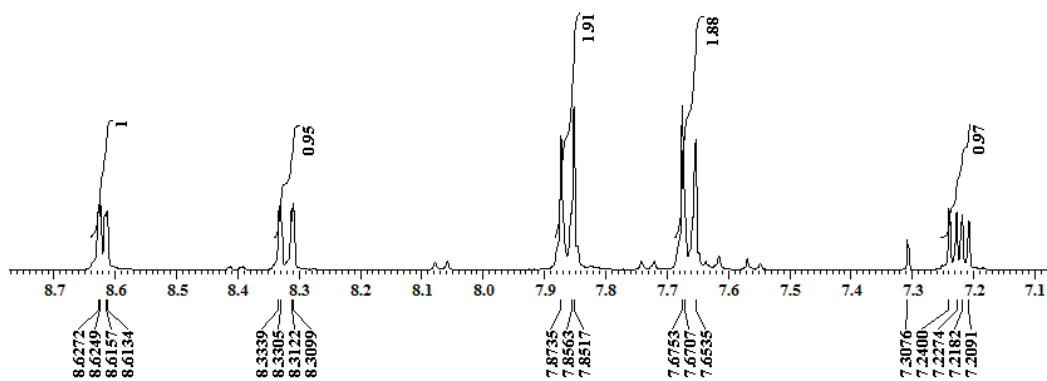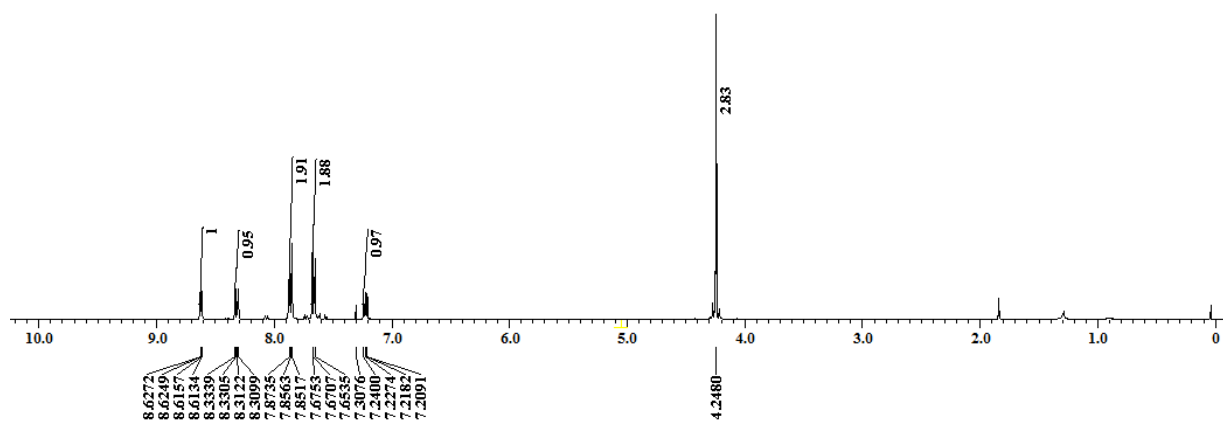



3-(4-bromophenyl)-1-methyl-1H-pyrazolo[3,4-b]pyridine (3e)

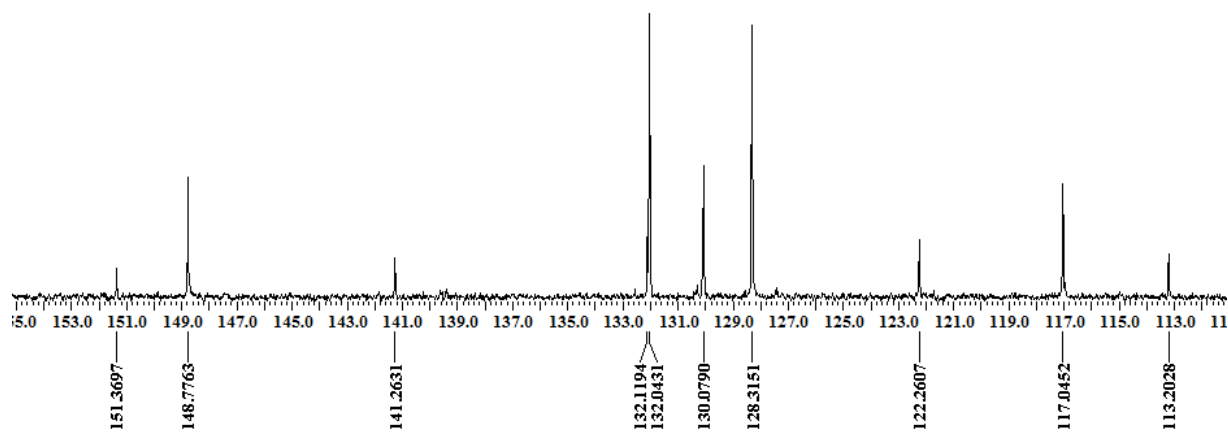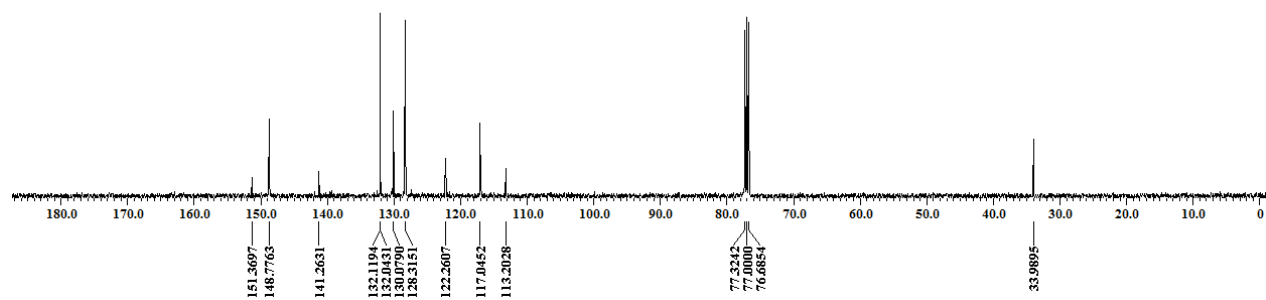

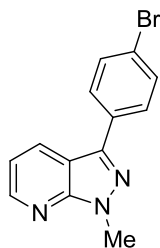

3-(4-bromophenyl)-1-methyl-1H-pyrazolo[3,4-b]pyridine (**3e**)

## Qualitative Compound Report

|                        |              |               |                     |
|------------------------|--------------|---------------|---------------------|
| Data File              | URV5-74.d    | Sample Name   | URV5-74             |
| Sample Type            | Sample       | Position      | P1-F4               |
| Instrument Name        | Instrument 1 | User Name     |                     |
| Acq Method             | 29.10.2014.m | Acquired Time | 02-05-2017 14:44:00 |
| IRM Calibration Status | Success      | DA Method     | Default.m           |
| Comment                |              |               |                     |

|                |                             |       |
|----------------|-----------------------------|-------|
| Sample Group   |                             | Info. |
| Acquisition SW | 6200 series TOF/6500 series |       |
| Version        | Q-TOF B.05.01 (B5125)       |       |

### Compound Table

| Compound Label        | RT | Mass     | Formula       | MFG Formula   | MFG Diff (ppm) | DB Formula    |
|-----------------------|----|----------|---------------|---------------|----------------|---------------|
| Cpd 22: C13 H10 Br N3 | 10 | 287.0055 | C13 H10 Br N3 | C13 H10 Br N3 | 1.05           | C13 H10 Br N3 |

| Compound Label        | m/z      | RT | Algorithm                 | Mass     |
|-----------------------|----------|----|---------------------------|----------|
| Cpd 22: C13 H10 Br N3 | 288.0129 | 10 | Find by Molecular Feature | 287.0055 |

### MFE MS Spectrum

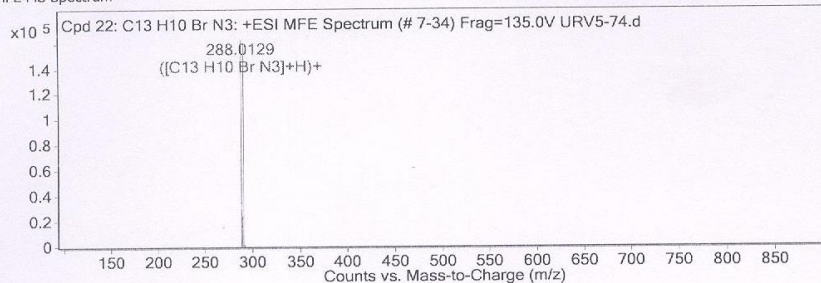

### MFE MS Zoomed Spectrum

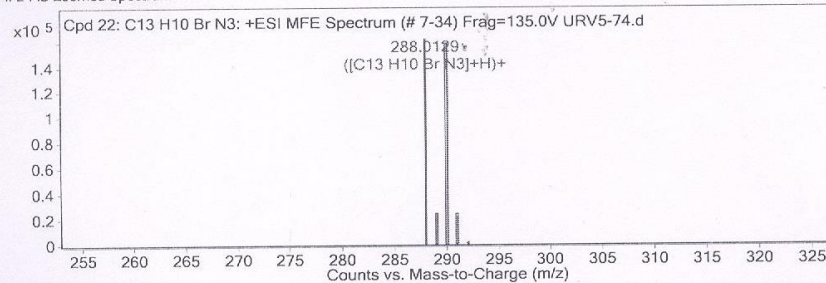

### MS Spectrum Peak List

| m/z      | z | Abund     | Formula       | Ion    |
|----------|---|-----------|---------------|--------|
| 288.0129 | 1 | 162205.59 | C13 H10 Br N3 | (M+H)+ |
| 289.0158 | 1 | 24480.41  | C13 H10 Br N3 | (M+H)+ |
| 290.0108 | 1 | 158587.51 | C13 H10 Br N3 | (M+H)+ |
| 291.0136 | 1 | 22745.08  | C13 H10 Br N3 | (M+H)+ |
| 292.0171 | 1 | 1718.36   | C13 H10 Br N3 | (M+H)+ |

--- End Of Report ---

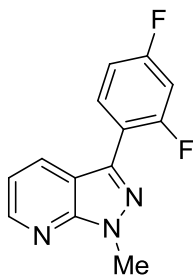

3-(2,4-difluorophenyl)-1-methyl-1H-pyrazolo[3,4-b]pyridine (**3f**)

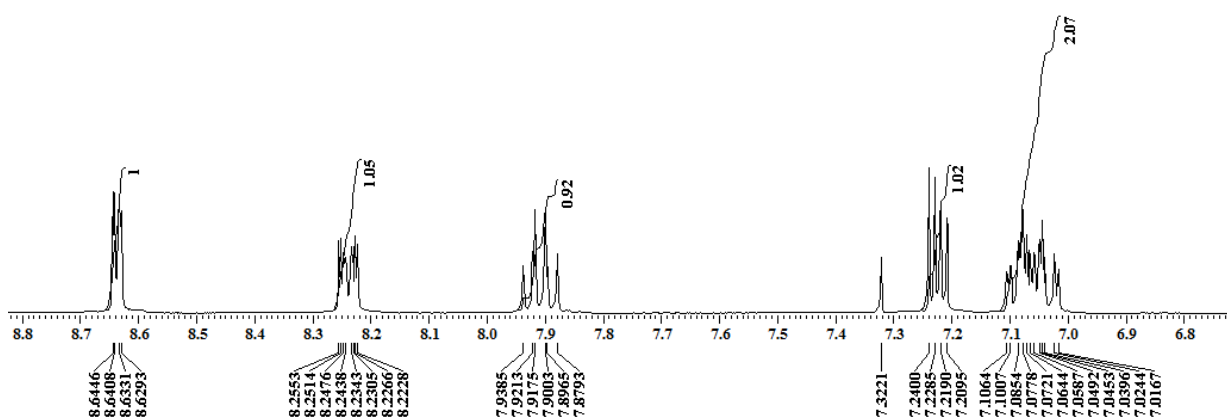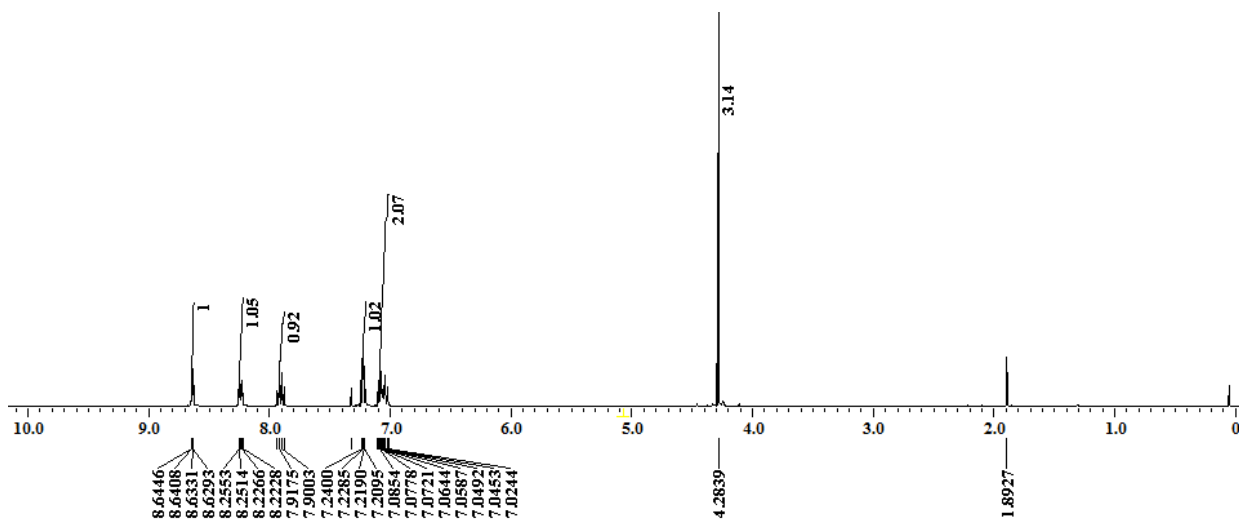

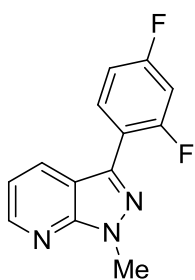

3-(2,4-difluorophenyl)-1-methyl-1H-pyrazolo[3,4-b]pyridine (**3f**)

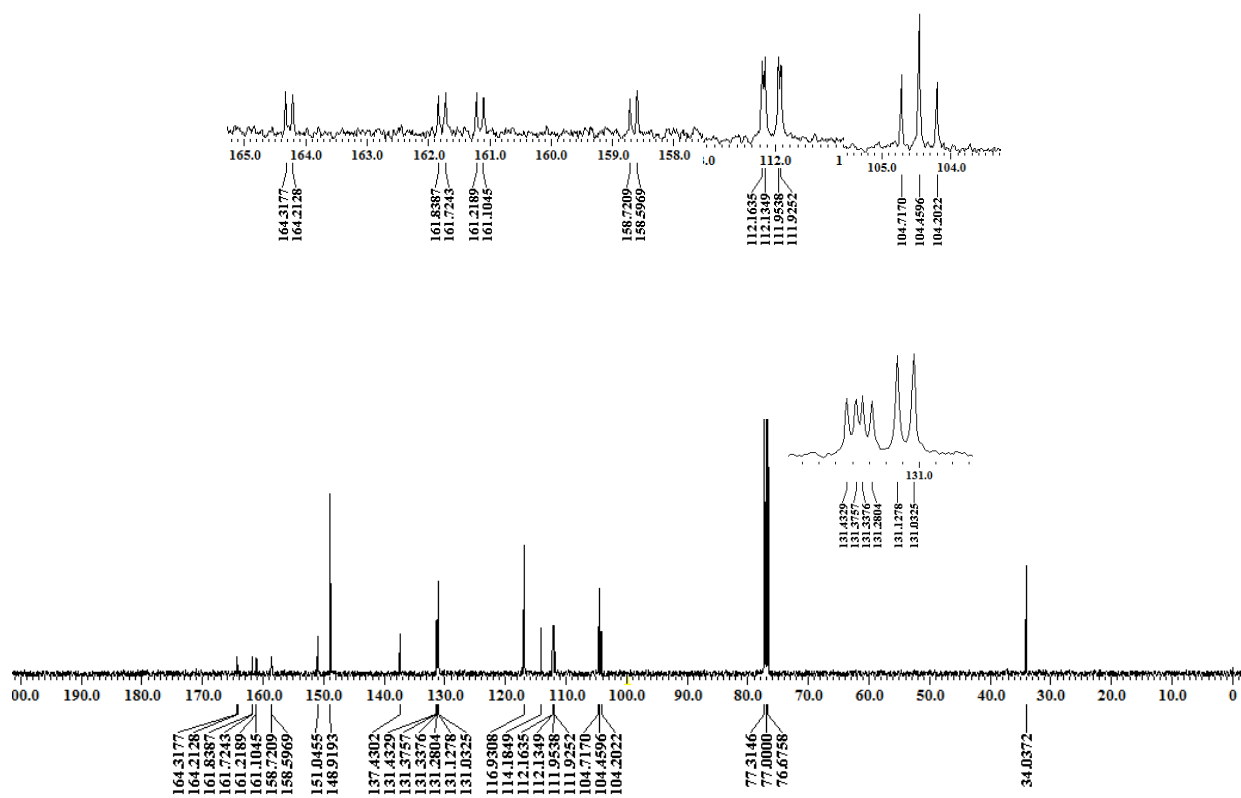

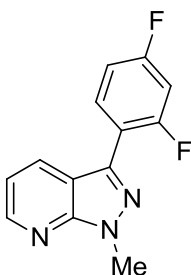

3-(2,4-difluorophenyl)-1-methyl-1H-pyrazolo[3,4-b]pyridine (**3f**)

## Qualitative Compound Report

|                               |              |                      |                     |
|-------------------------------|--------------|----------------------|---------------------|
| <b>Data File</b>              | URV5-51.d    | <b>Sample Name</b>   | URV5-51             |
| <b>Sample Type</b>            | Sample       | <b>Position</b>      | P1-B5               |
| <b>Instrument Name</b>        | Instrument 1 | <b>User Name</b>     |                     |
| <b>Acq Method</b>             | 29.10.2014.m | <b>Acquired Time</b> | 15-03-2017 13:47:03 |
| <b>IRM Calibration Status</b> | Success      | <b>DA Method</b>     | Default.m           |
| <b>Comment</b>                |              |                      |                     |

|                       |                             |              |
|-----------------------|-----------------------------|--------------|
| <b>Sample Group</b>   |                             | <b>Info.</b> |
| <b>Acquisition SW</b> | 6200 series TOF/6500 series |              |
| <b>Version</b>        | Q-TOF B.05.01 (B5125)       |              |

### Compound Table

| Compound Label       | RT | Mass     | Formula      | MFG Formula  | MFG Diff (ppm) | DB Formula   |
|----------------------|----|----------|--------------|--------------|----------------|--------------|
| Cpd 11: C13 H9 F2 N3 | 12 | 245.0785 | C13 H9 F2 N3 | C13 H9 F2 N3 | -8.29          | C13 H9 F2 N3 |

| Compound Label       | m/z      | RT | Algorithm                 | Mass     |
|----------------------|----------|----|---------------------------|----------|
| Cpd 11: C13 H9 F2 N3 | 246.0858 | 12 | Find by Molecular Feature | 245.0785 |

### MFE MS Spectrum

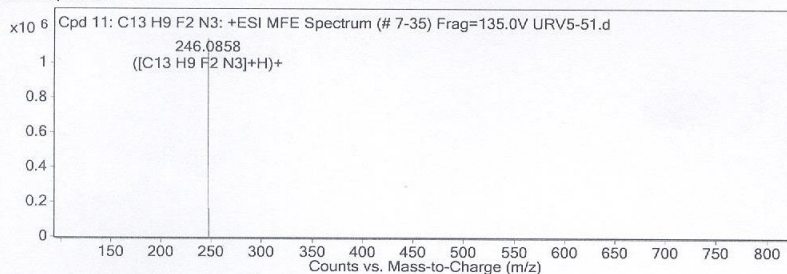

### MFE MS Zoomed Spectrum

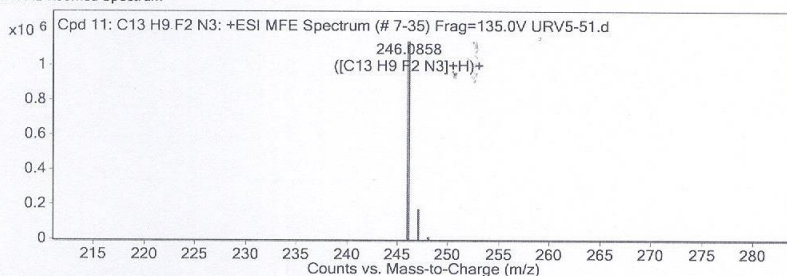

### MS Spectrum Peak List

| m/z      | z | Abund    | Formula      | Ion    |
|----------|---|----------|--------------|--------|
| 246.0858 | 1 | 1141598  | C13 H9 F2 N3 | (M+H)+ |
| 247.0886 | 1 | 165492   | C13 H9 F2 N3 | (M+H)+ |
| 248.0918 | 1 | 11599.09 | C13 H9 F2 N3 | (M+H)+ |
| 249.085  | 1 | 268.56   | C13 H9 F2 N3 | (M+H)+ |

--- End Of Report ---



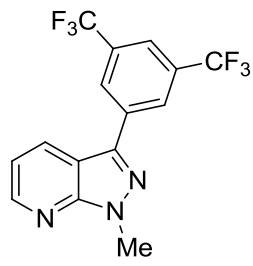

3-(3,5-bis(trifluoromethyl)phenyl)-1-methyl-1H-pyrazolo[3,4-b]pyridine (**3g**)

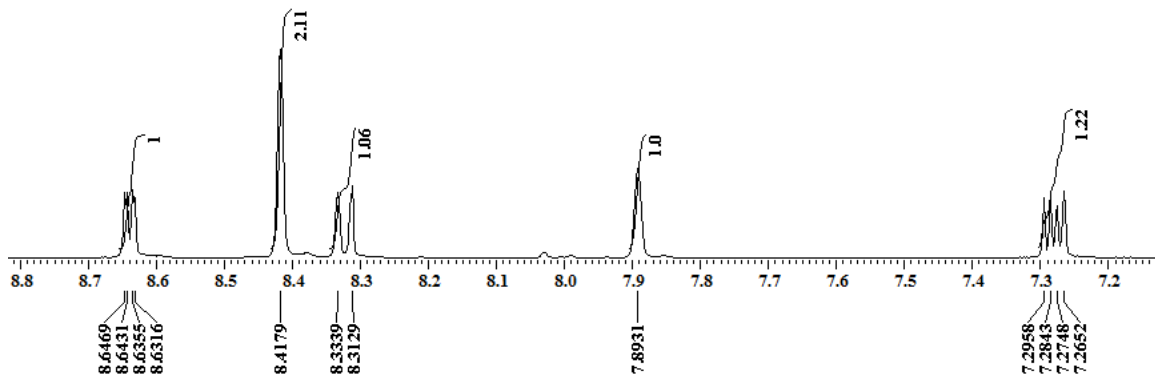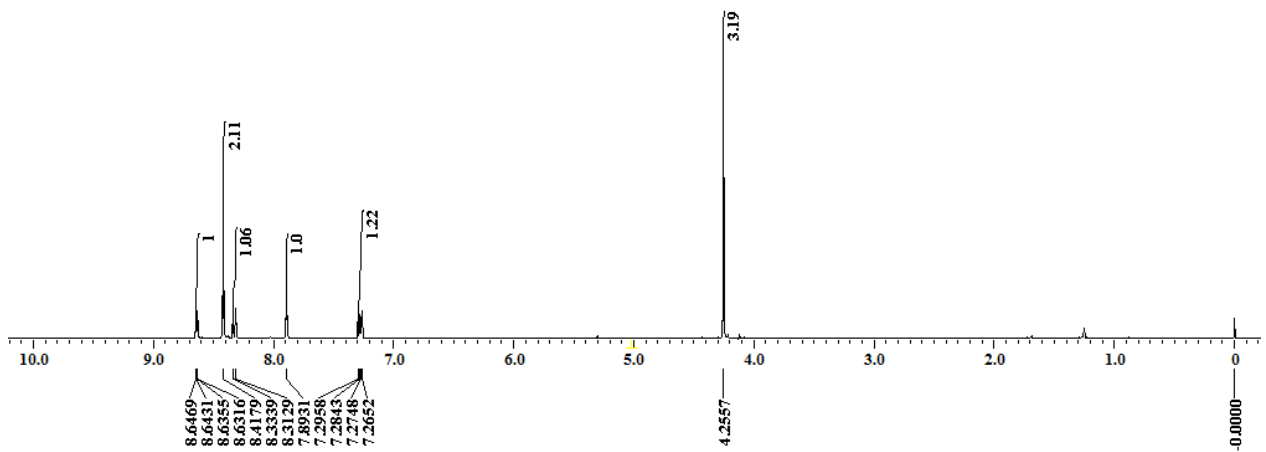

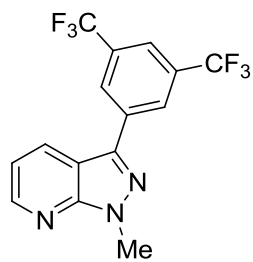

3-(3,5-bis(trifluoromethyl)phenyl)-1-methyl-1H-pyrazolo[3,4-b]pyridine (**3g**)

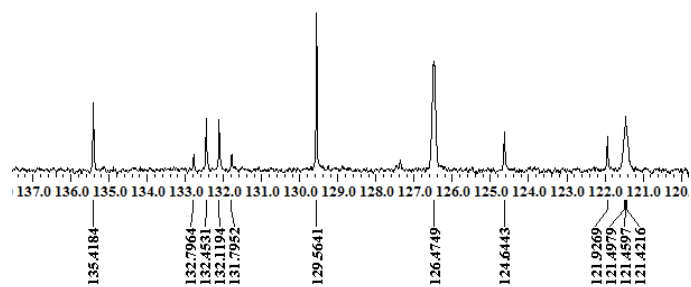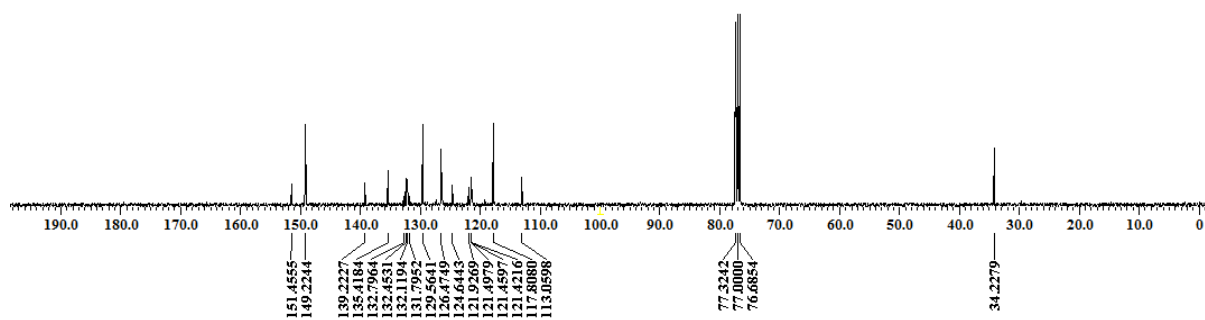

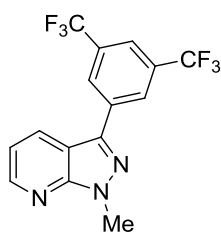

3-(3,5-bis(trifluoromethyl)phenyl)-1-methyl-1H-pyrazolo[3,4-b]pyridine (**3g**)

## Qualitative Compound Report

|                               |              |                      |                     |
|-------------------------------|--------------|----------------------|---------------------|
| <b>Data File</b>              | URV5-50FI.d  | <b>Sample Name</b>   | URV5-50FI           |
| <b>Sample Type</b>            | Sample       | <b>Position</b>      | P1-B9               |
| <b>Instrument Name</b>        | Instrument 1 | <b>User Name</b>     |                     |
| <b>Acq Method</b>             | 29.10.2014.m | <b>Acquired Time</b> | 27-04-2017 13:41:02 |
| <b>IRM Calibration Status</b> | Success      | <b>DA Method</b>     | Default.m           |
| <b>Comment</b>                |              |                      |                     |

|                       |                             |              |
|-----------------------|-----------------------------|--------------|
| <b>Sample Group</b>   |                             | <b>Info.</b> |
| <b>Acquisition SW</b> | 6200 series TOF/6500 series |              |
| <b>Version</b>        | Q-TOF B.05.01 (B5125)       |              |

### Compound Table

| Compound Label       | RT | Mass     | Formula      | MFG Formula  | MFG Diff (ppm) | DB Formula   |
|----------------------|----|----------|--------------|--------------|----------------|--------------|
| Cpd 24: C15 H9 F6 N3 | 10 | 345.0699 | C15 H9 F6 N3 | C15 H9 F6 N3 | 0.39           | C15 H9 F6 N3 |

| Compound Label       | m/z      | RT | Algorithm                 | Mass     |
|----------------------|----------|----|---------------------------|----------|
| Cpd 24: C15 H9 F6 N3 | 346.0771 | 10 | Find by Molecular Feature | 345.0699 |

### MFE MS Spectrum

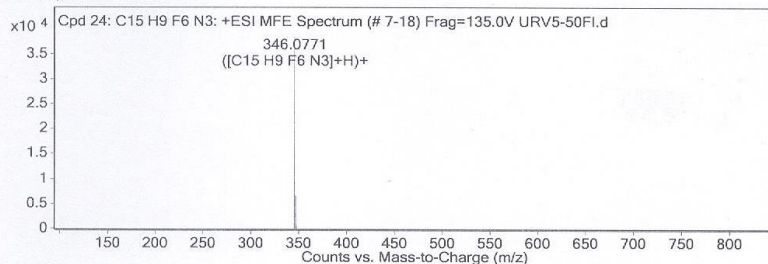

### MFE MS Zoomed Spectrum

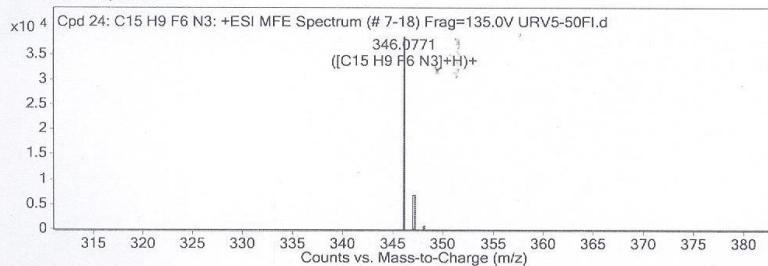

### MS Spectrum Peak List

| m/z      | z | Abund   | Formula      | Ion    |
|----------|---|---------|--------------|--------|
| 346.0771 | 1 | 38484.7 | C15 H9 F6 N3 | (M+H)+ |
| 347.0801 | 1 | 6687.71 | C15 H9 F6 N3 | (M+H)+ |
| 348.0873 | 1 | 705.14  | C15 H9 F6 N3 | (M+H)+ |

--- End Of Report ---

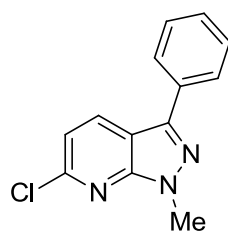

6-chloro-1-methyl-3-phenyl-1H-pyrazolo[3,4-b]pyridine (3h)

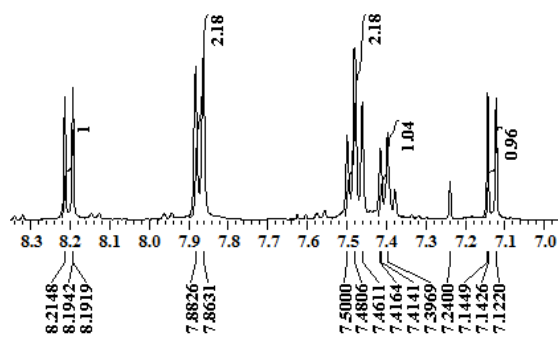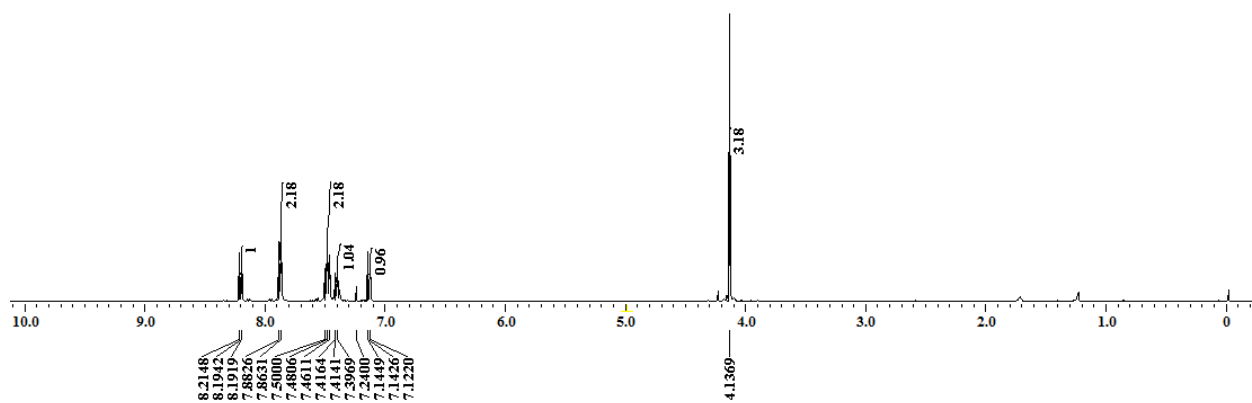

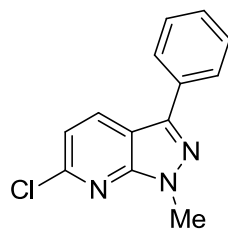

6-chloro-1-methyl-3-phenyl-1*H*-pyrazolo[3,4-*b*]pyridine (3h)

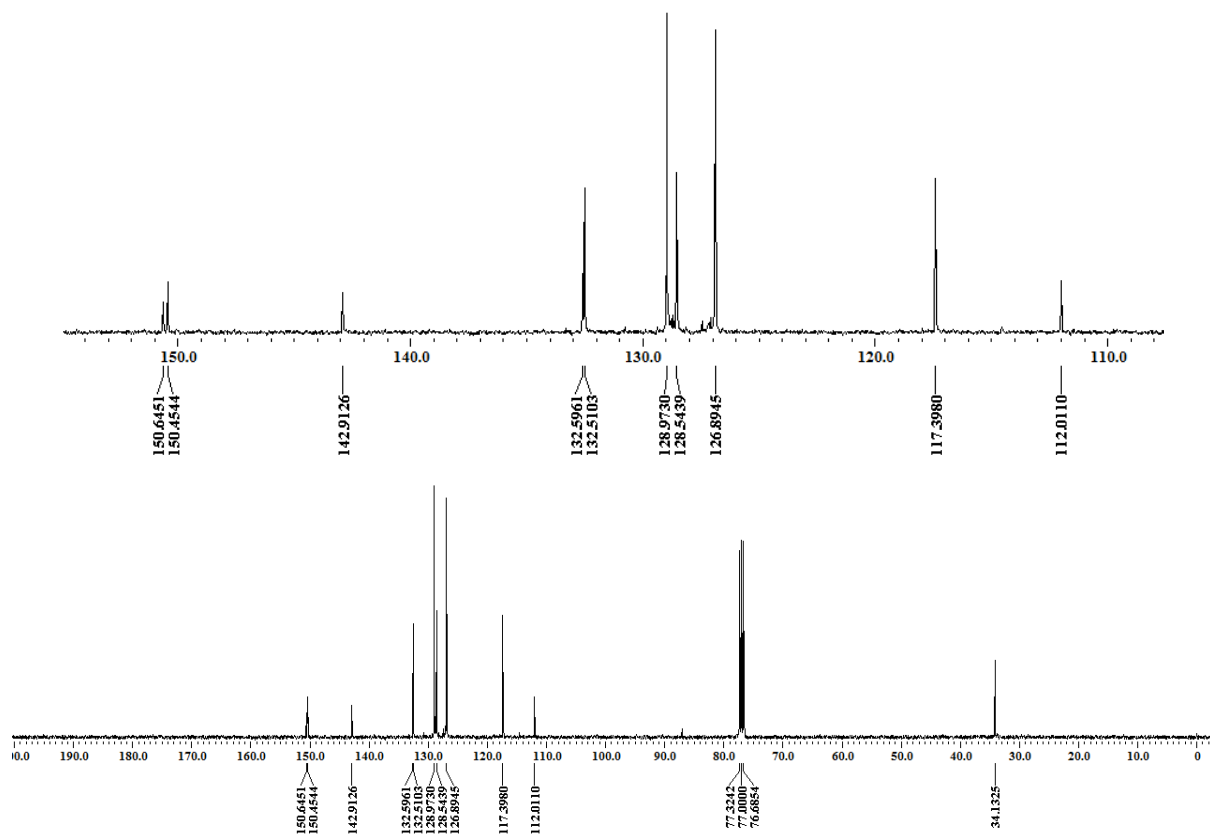



6-chloro-1-methyl-3-phenyl-1H-pyrazolo[3,4-b]pyridine (**3h**)

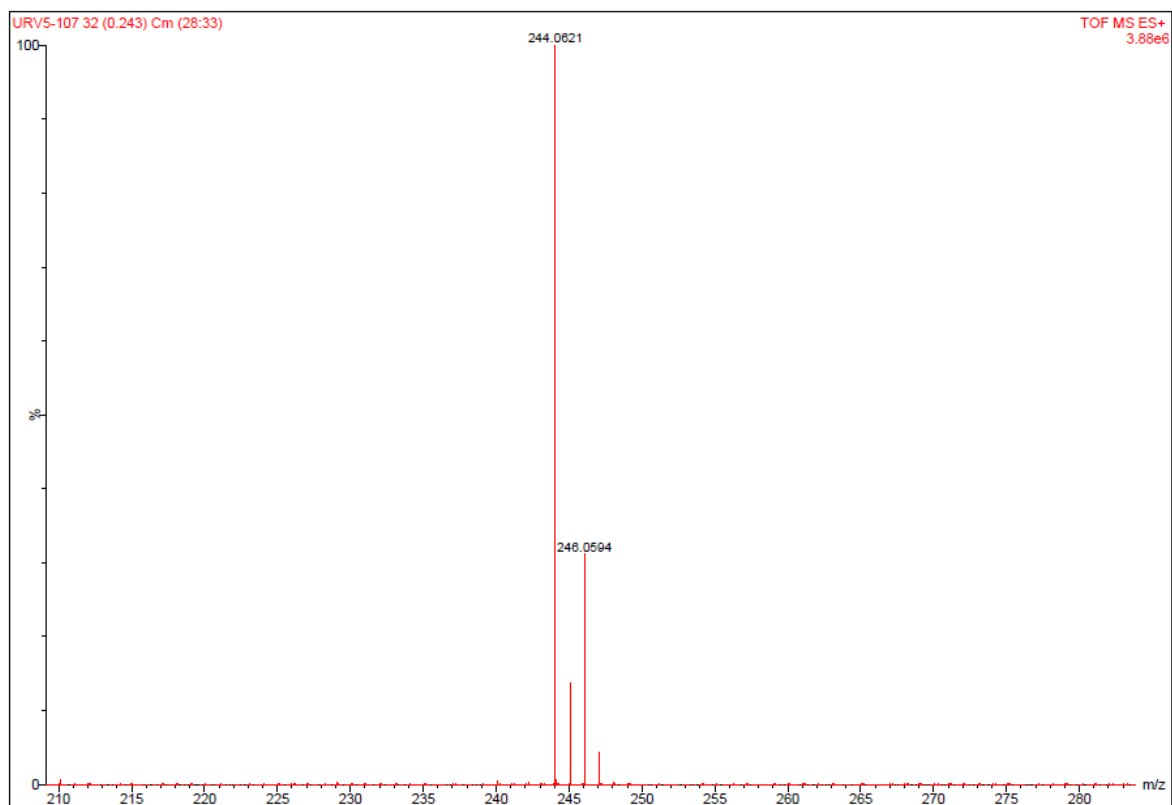

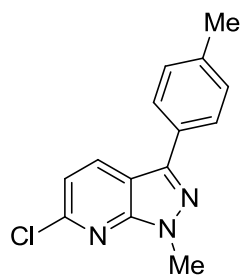

6-chloro-1-methyl-3-(*p*-tolyl)-1*H*-pyrazolo[3,4-*b*]pyridine (**3i**)

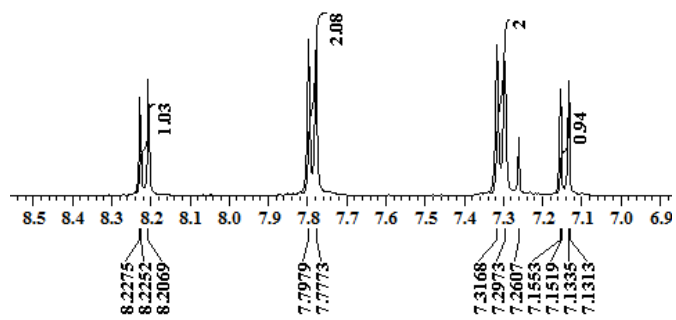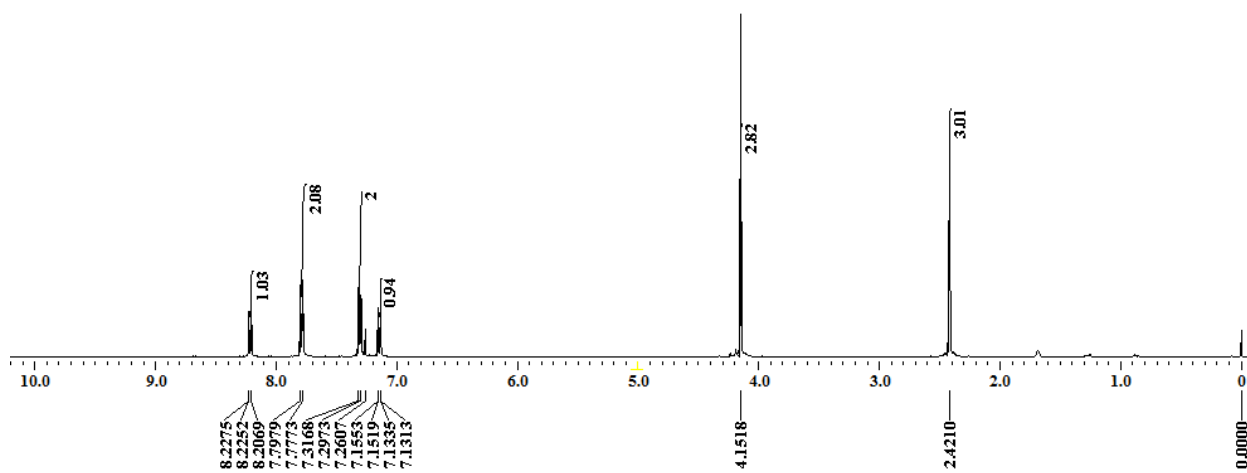

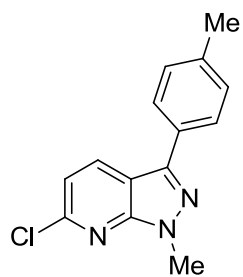

6-chloro-1-methyl-3-(p-tolyl)-1H-pyrazolo[3,4-b]pyridine (3i)

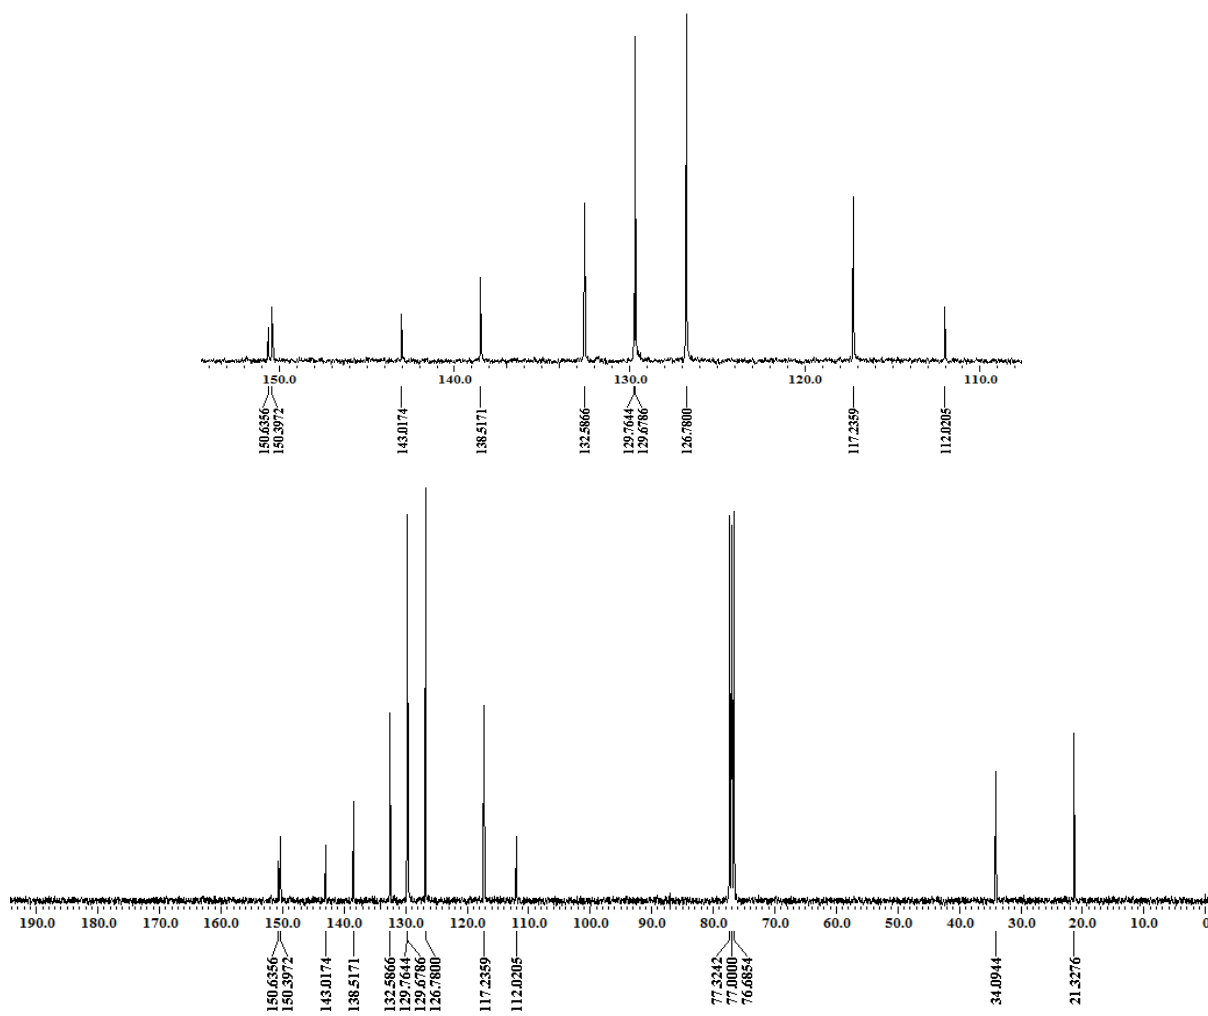





6-chloro-1-methyl-3-(*p*-tolyl)-1*H*-pyrazolo[3,4-*b*]pyridine (**3i**)

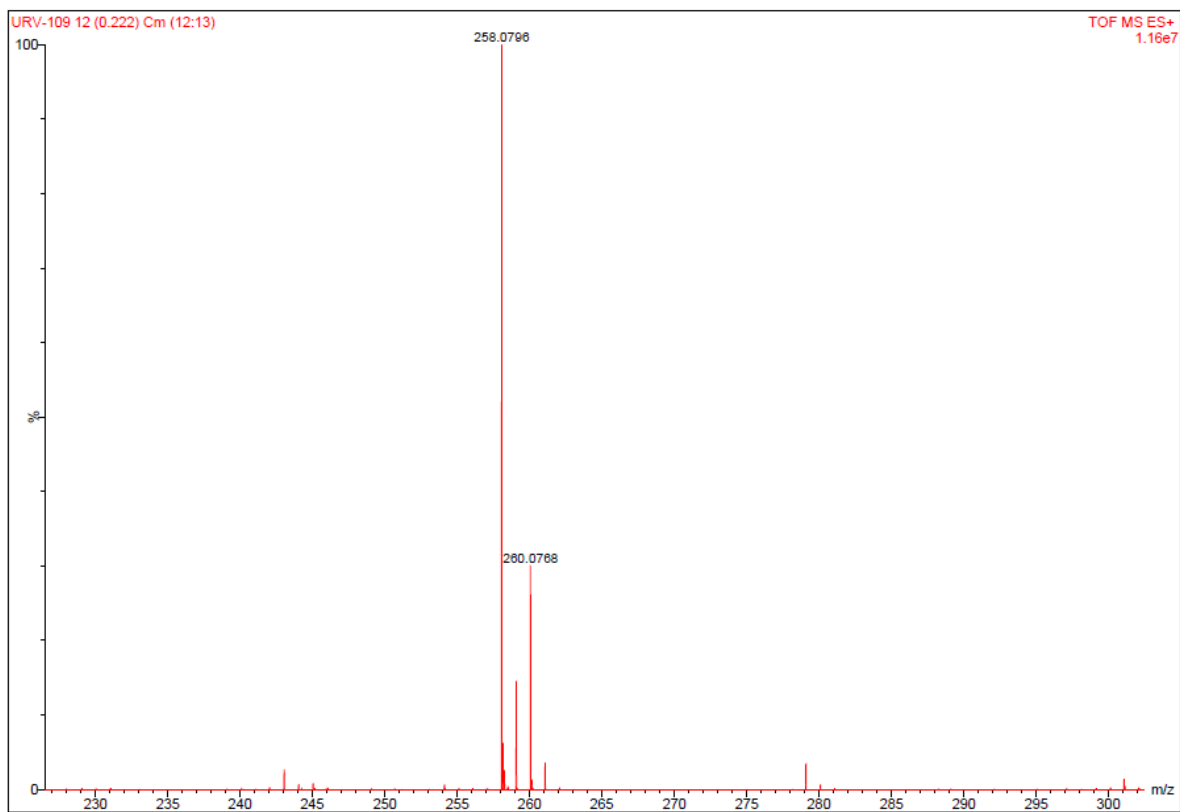

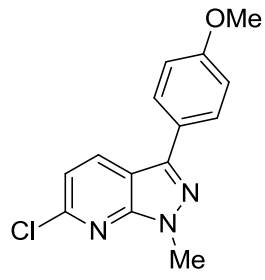

6-chloro-3-(4-methoxyphenyl)-1-methyl-1H-pyrazolo[3,4-b]pyridine (**3j**)

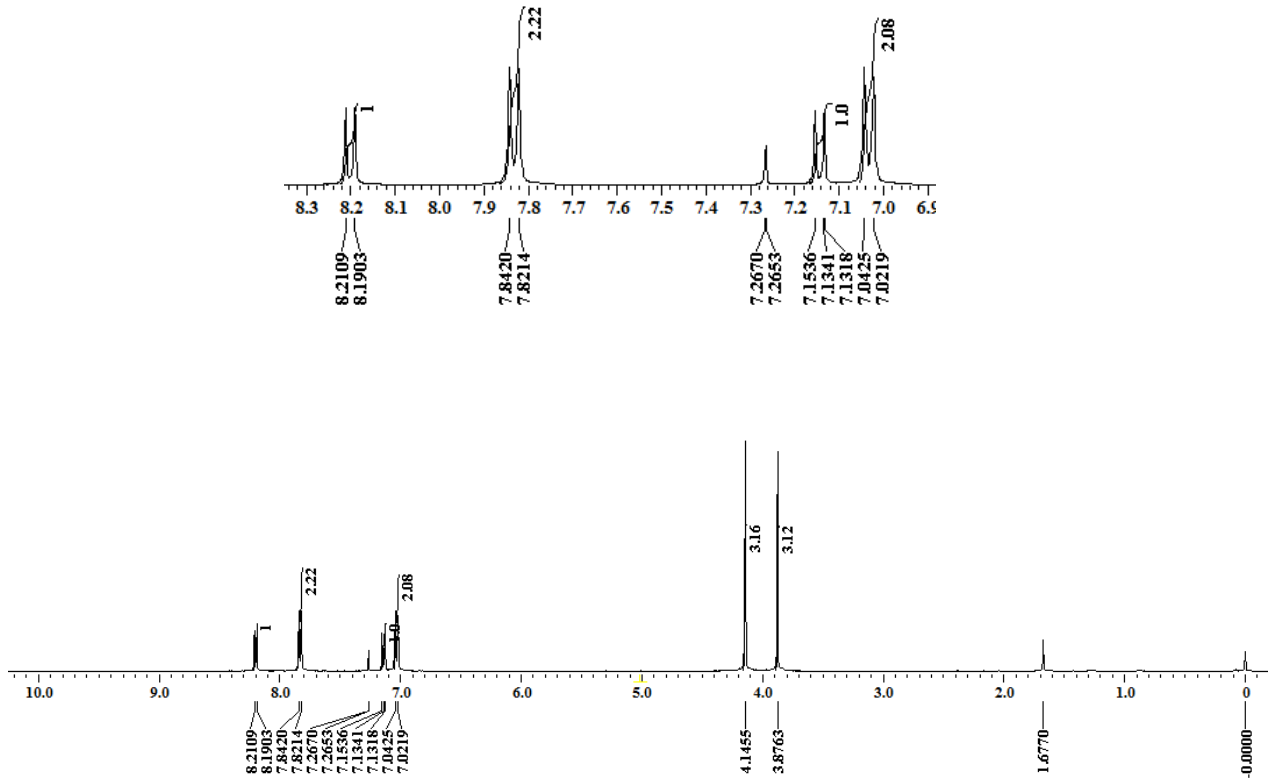

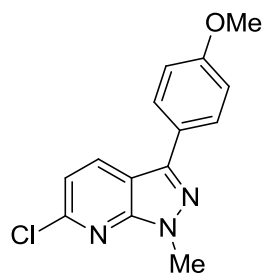

6-chloro-3-(4-methoxyphenyl)-1-methyl-1H-pyrazolo[3,4-b]pyridine (**3j**)

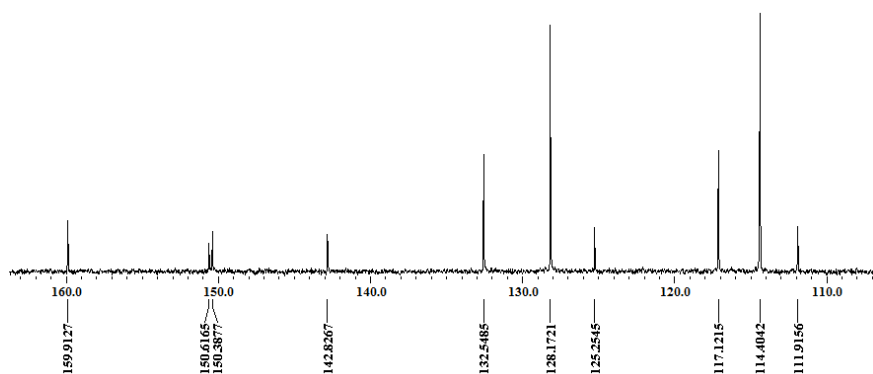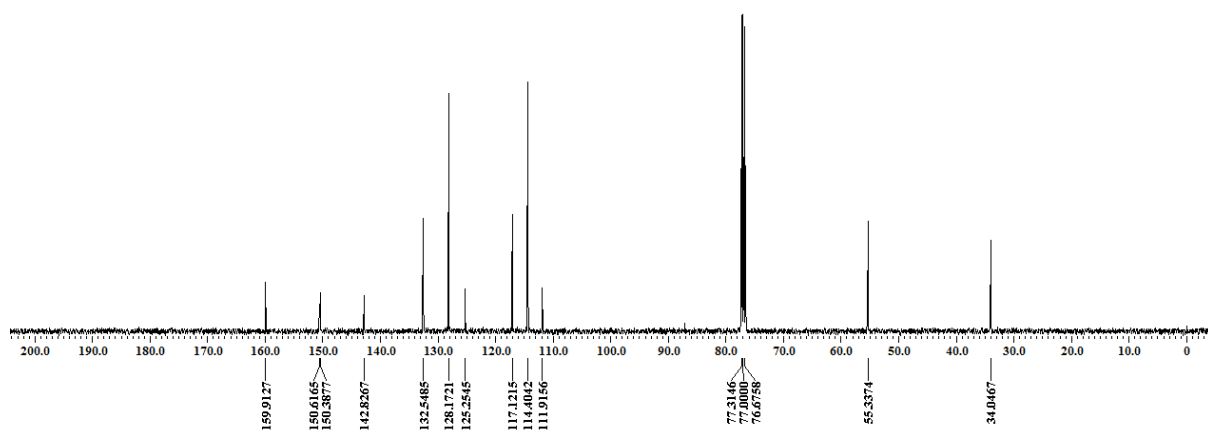

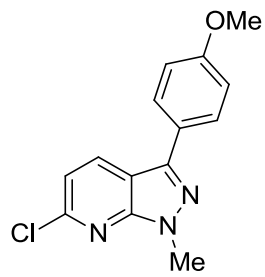

6-chloro-3-(4-methoxyphenyl)-1-methyl-1H-pyrazolo[3,4-b]pyridine (**3j**)

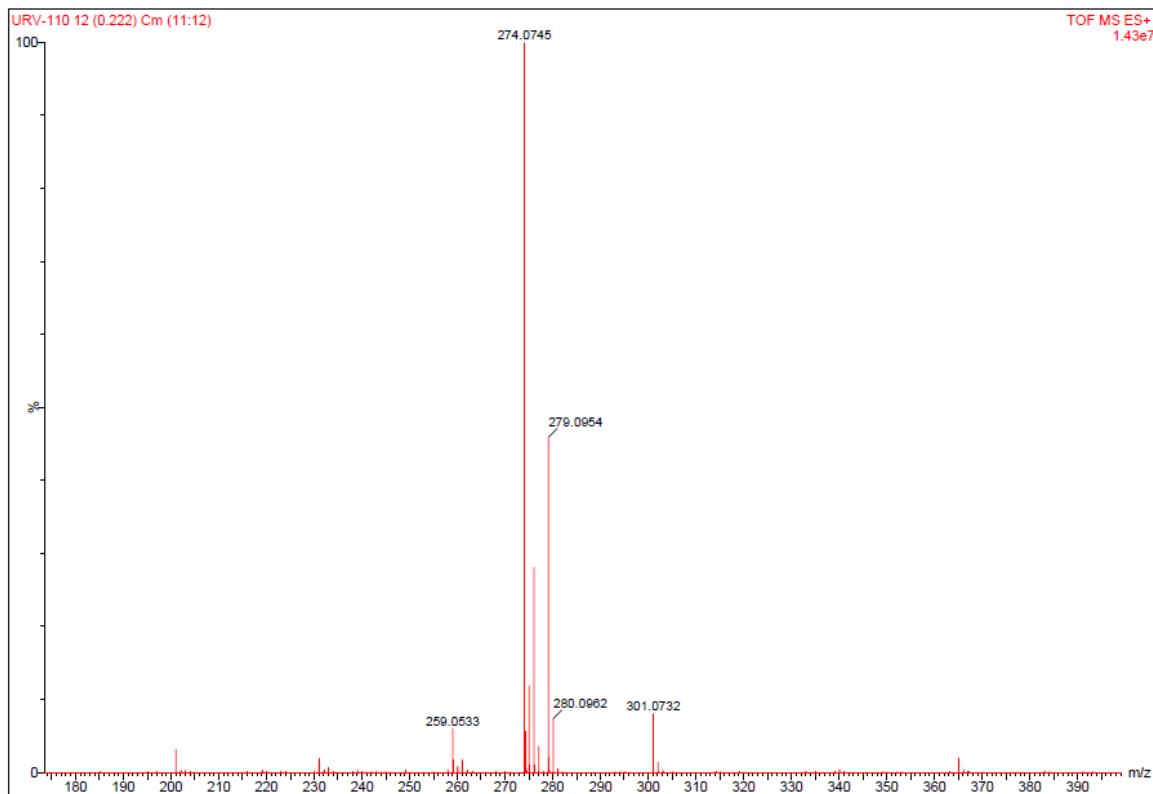

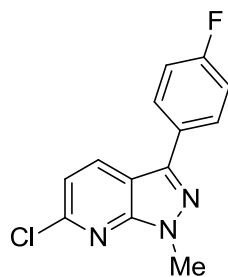

6-chloro-3-(4-fluorophenyl)-1-methyl-1H-pyrazolo[3,4-b]pyridine (**3k**)

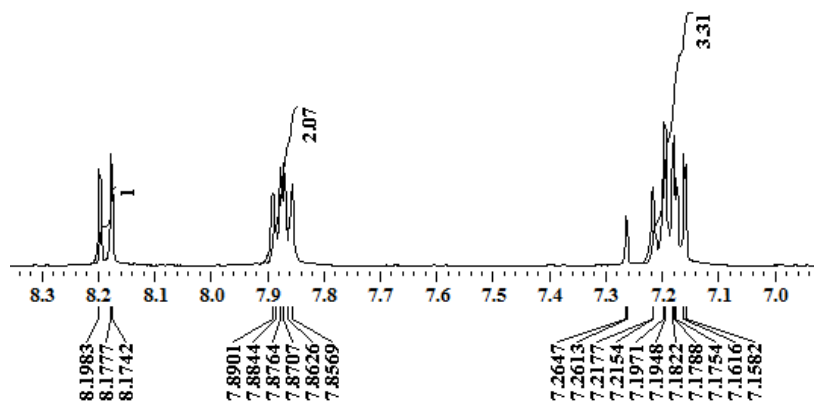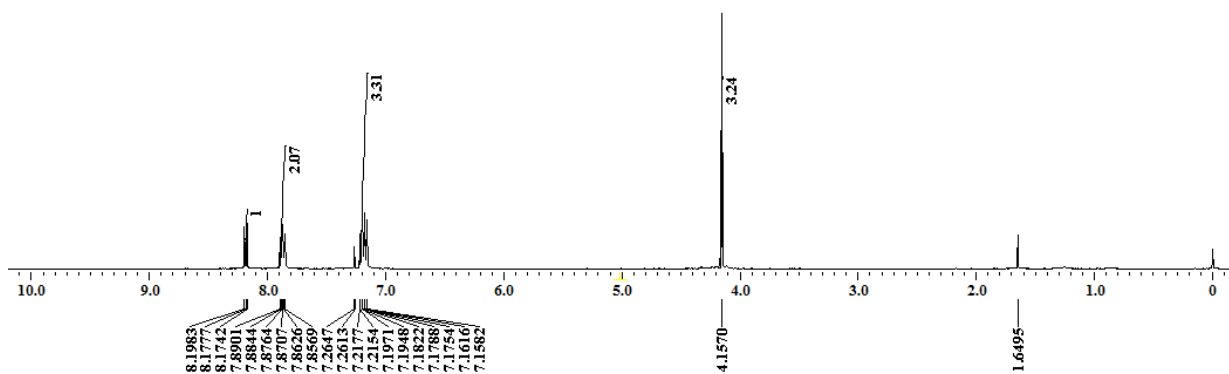

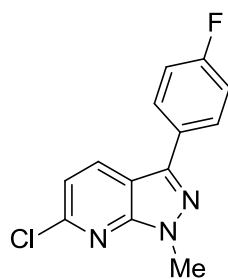

6-chloro-3-(4-fluorophenyl)-1-methyl-1H-pyrazolo[3,4-b]pyridine (**3k**)

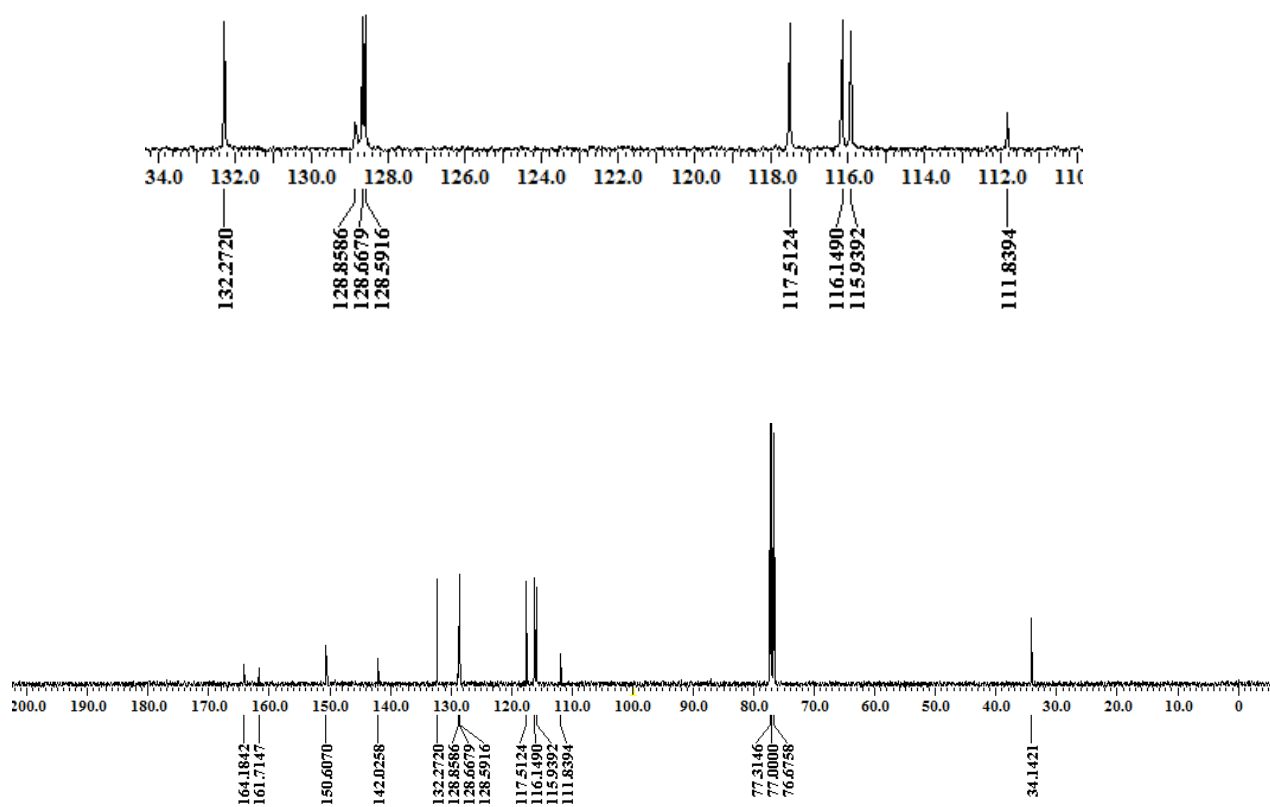

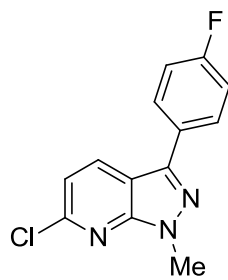

6-chloro-3-(4-fluorophenyl)-1-methyl-1*H*-pyrazolo[3,4-*b*]pyridine (**3k**)

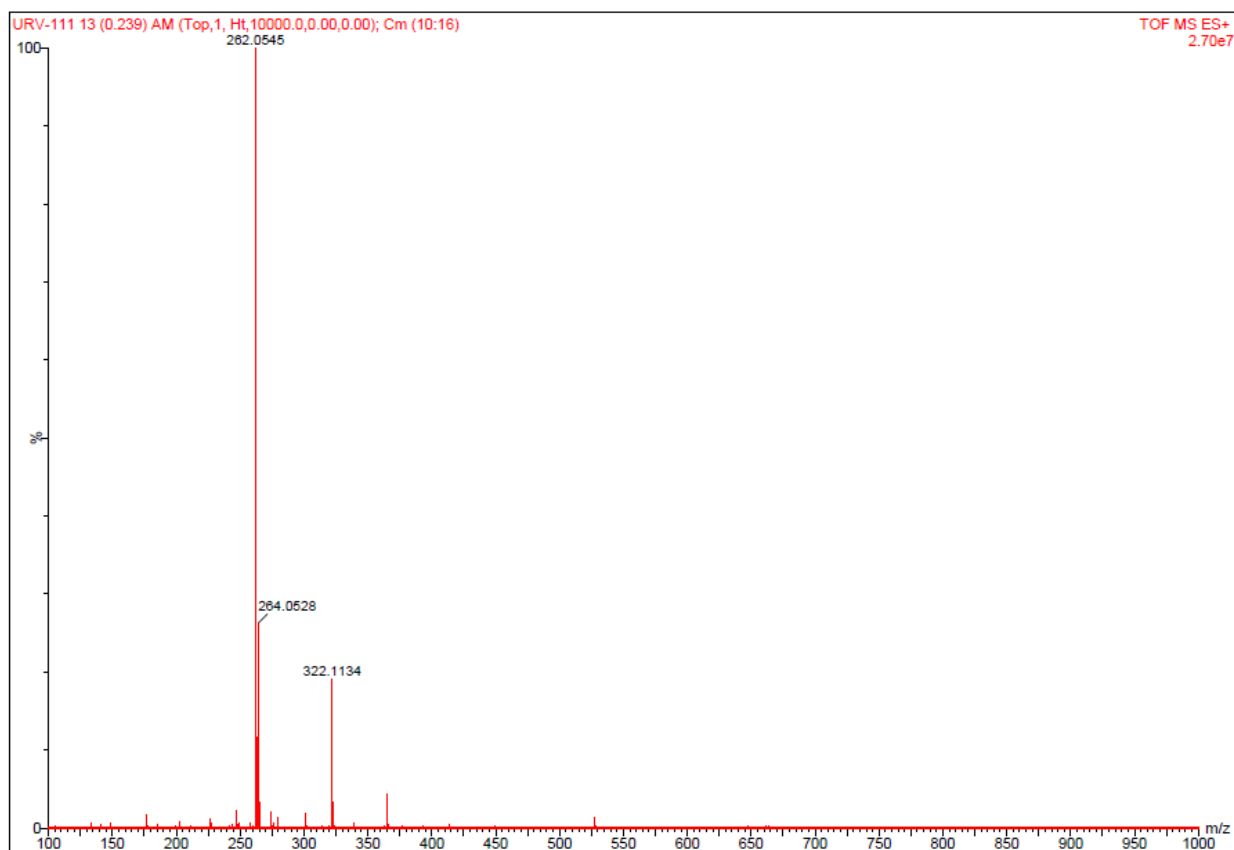

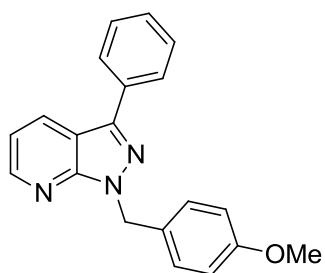

1-(4-methoxybenzyl)-3-phenyl-1*H*-pyrazolo[3,4-*b*]pyridine (**31**)

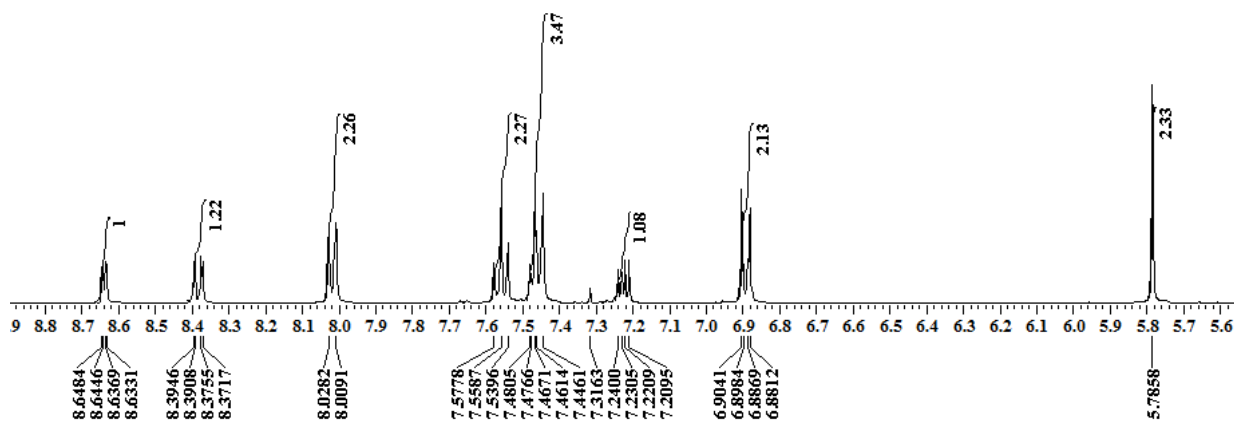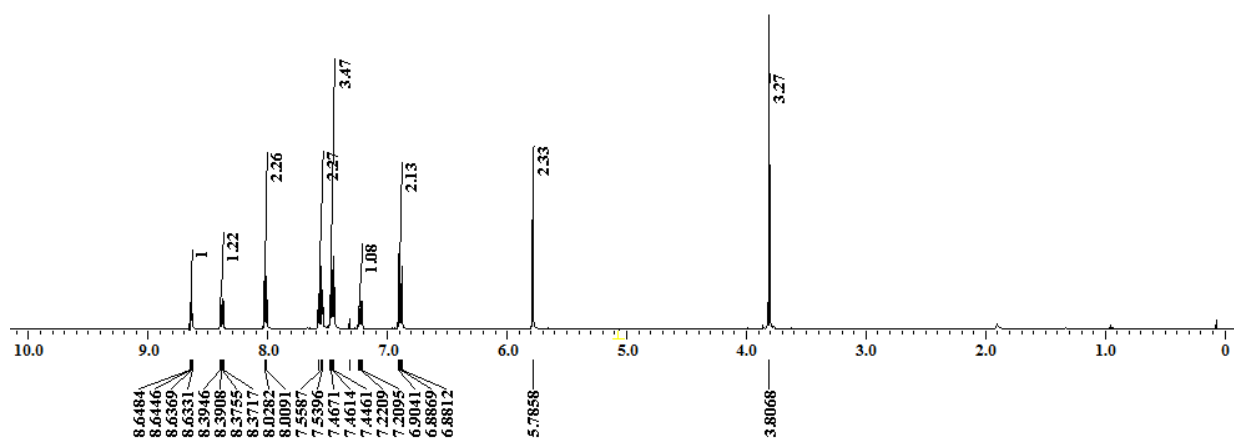



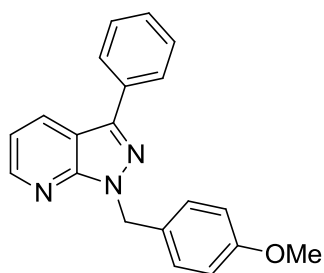

1-(4-methoxybenzyl)-3-phenyl-1*H*-pyrazolo[3,4-*b*]pyridine (**3I**)

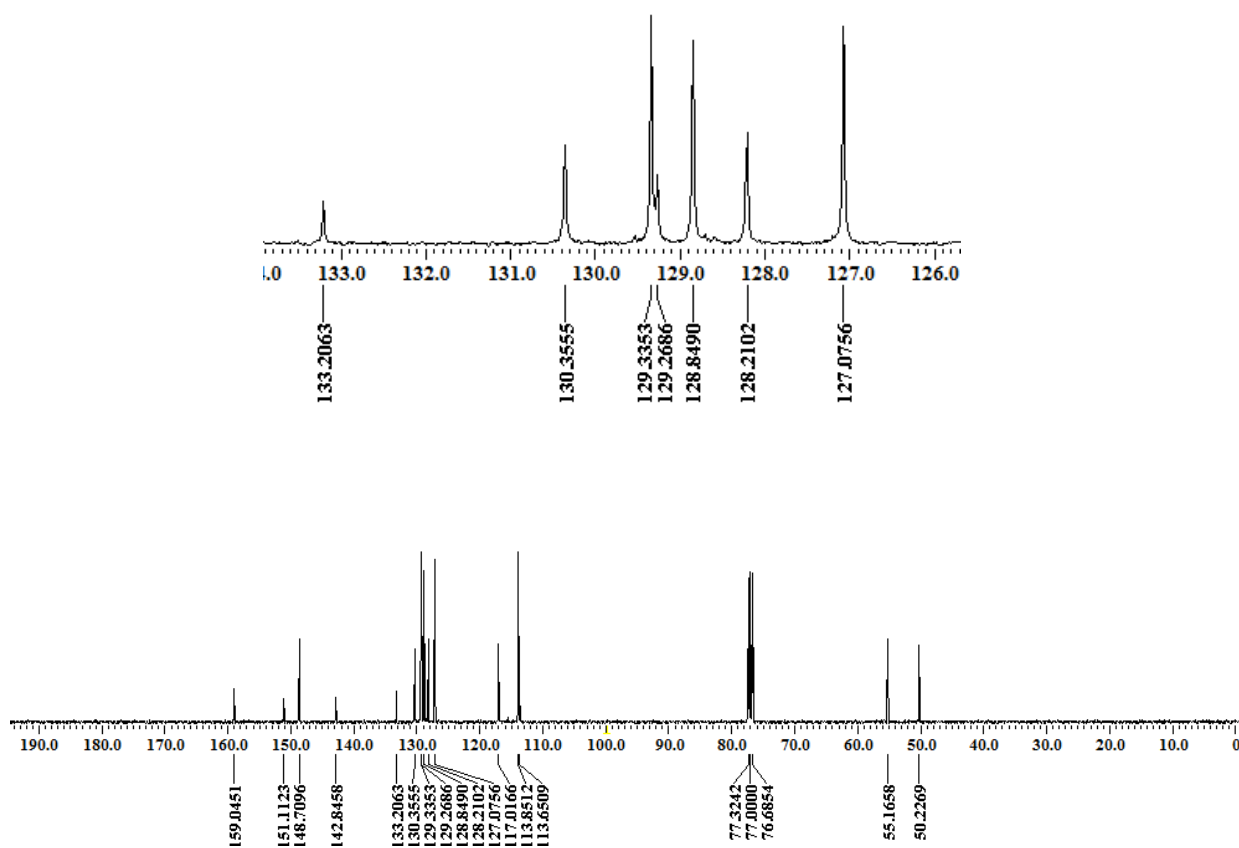

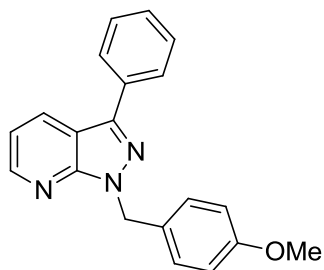

1-(4-methoxybenzyl)-3-phenyl-1H-pyrazolo[3,4-b]pyridine (**3I**)

## Qualitative Compound Report

|                               |              |                      |                     |
|-------------------------------|--------------|----------------------|---------------------|
| <b>Data File</b>              | URV5-52.d    | <b>Sample Name</b>   | URV5-52             |
| <b>Sample Type</b>            | Sample       | <b>Position</b>      | P1-B6               |
| <b>Instrument Name</b>        | Instrument 1 | <b>User Name</b>     |                     |
| <b>Acq Method</b>             | 29.10.2014.m | <b>Acquired Time</b> | 15-03-2017 13:48:56 |
| <b>IRM Calibration Status</b> | Success      | <b>DA Method</b>     | Default.m           |
| <b>Comment</b>                |              |                      |                     |

|                       |                             |              |
|-----------------------|-----------------------------|--------------|
| <b>Sample Group</b>   |                             | <b>Info.</b> |
| <b>Acquisition SW</b> | 6200 series TOF/6500 series |              |
| <b>Version</b>        | Q-TOF B.05.01 (B5125)       |              |

### Compound Table

| Compound Label      | RT | Mass     | Formula      | MFG Formula  | MFG Diff (ppm) | DB Formula   |
|---------------------|----|----------|--------------|--------------|----------------|--------------|
| Cpd 5: C20 H17 N3 O | 11 | 315.1396 | C20 H17 N3 O | C20 H17 N3 O | -7.63          | C20 H17 N3 O |

| Compound Label      | m/z      | RT | Algorithm                 | Mass     |
|---------------------|----------|----|---------------------------|----------|
| Cpd 5: C20 H17 N3 O | 316.1468 | 11 | Find by Molecular Feature | 315.1396 |

### MFE MS Spectrum

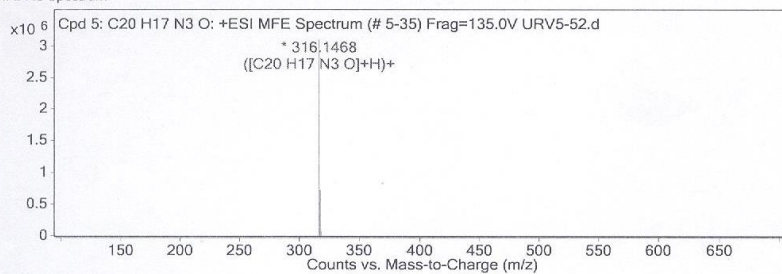

### MFE MS Zoomed Spectrum

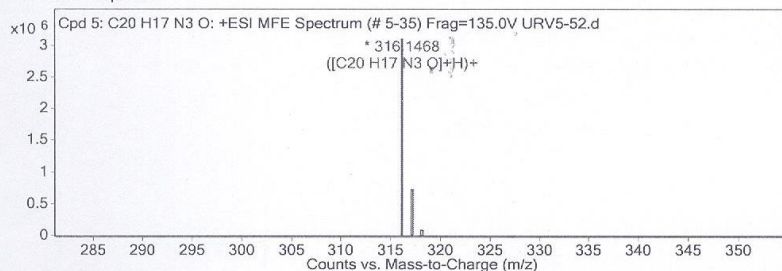

### MS Spectrum Peak List

| m/z      | z | Abund     | Formula      | Ion    |
|----------|---|-----------|--------------|--------|
| 316.1468 | 1 | 3106500   | C20 H17 N3 O | (M+H)+ |
| 317.15   | 1 | 713660.16 | C20 H17 N3 O | (M+H)+ |
| 318.1526 | 1 | 78632.41  | C20 H17 N3 O | (M+H)+ |
| 319.1585 | 1 | 7594.01   | C20 H17 N3 O | (M+H)+ |
| 320.1535 | 1 | 478.53    | C20 H17 N3 O | (M+H)+ |

--- End Of Report ---

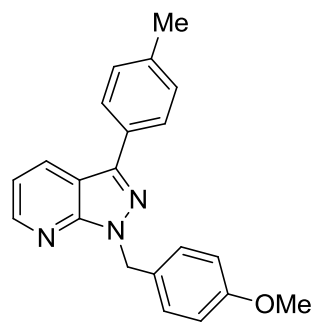

1-(4-methoxybenzyl)-3-(*p*-tolyl)-1*H*-pyrazolo[3,4-*b*]pyridine (**3m**)

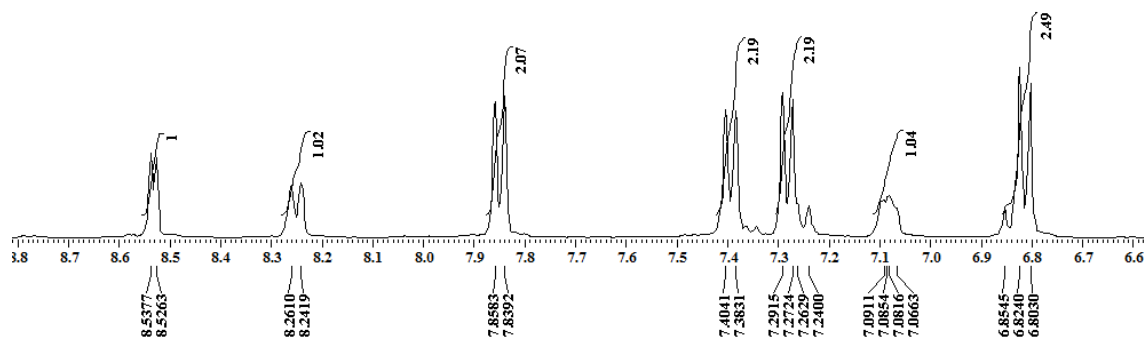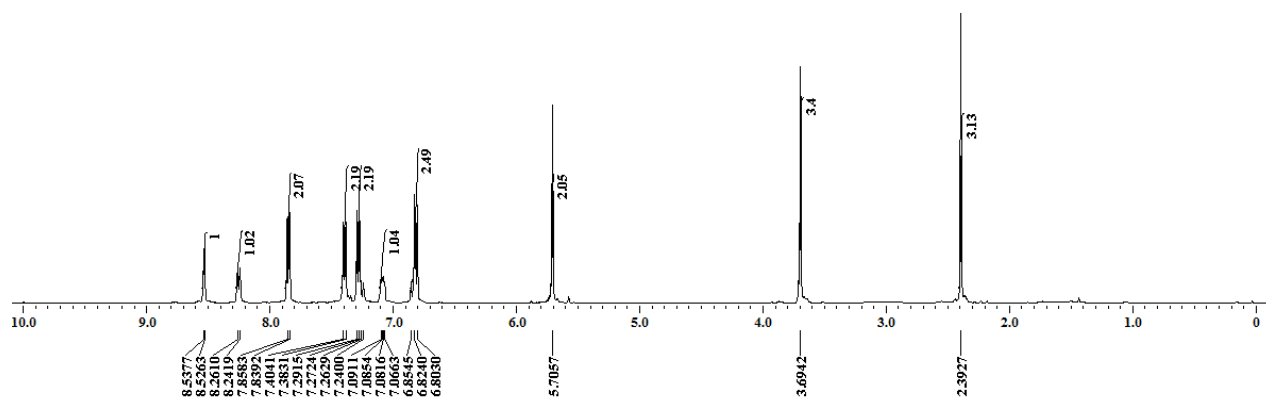



1-(4-methoxybenzyl)-3-(*p*-tolyl)-1*H*-pyrazolo[3,4-*b*]pyridine (**3m**)

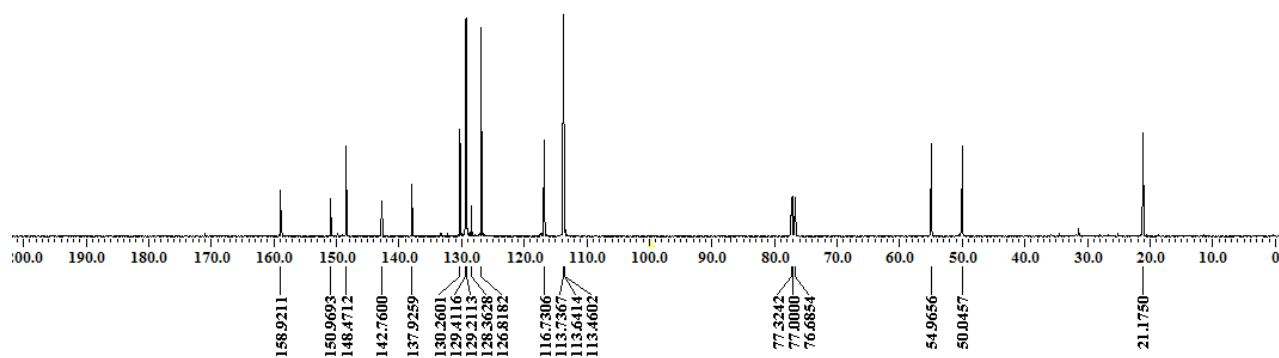

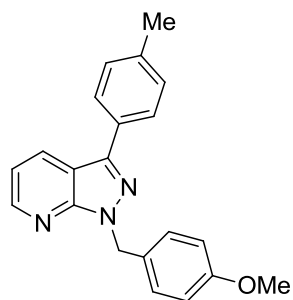

1-(4-methoxybenzyl)-3-(p-tolyl)-1H-pyrazolo[3,4-b]pyridine (3m)

## Qualitative Compound Report

|                        |              |               |                     |
|------------------------|--------------|---------------|---------------------|
| Data File              | URV5-67.d    | Sample Name   | URV5-67             |
| Sample Type            | Sample       | Position      | P1-A8               |
| Instrument Name        | Instrument 1 | User Name     |                     |
| Acq Method             | 29.10.2014.m | Acquired Time | 24-04-2017 13:10:01 |
| IRM Calibration Status | Success      | DA Method     | Default.m           |
| Comment                |              |               |                     |

|                |                             |       |
|----------------|-----------------------------|-------|
| Sample Group   |                             | Info. |
| Acquisition SW | 6200 series TOF/6500 series |       |
| Version        | Q-TOF B.05.01 (B5125)       |       |

### Compound Table

| Compound Label      | RT | Mass     | Formula      | MFG Formula  | MFG Diff (ppm) | DB Formula   |
|---------------------|----|----------|--------------|--------------|----------------|--------------|
| Cpd 1: C21 H19 N3 O | 11 | 329.1528 | C21 H19 N3 O | C21 H19 N3 O | 0.04           | C21 H19 N3 O |

| Compound Label      | m/z      | RT | Algorithm                 | Mass     |
|---------------------|----------|----|---------------------------|----------|
| Cpd 1: C21 H19 N3 O | 330.1607 | 11 | Find by Molecular Feature | 329.1528 |

### MFE MS Spectrum

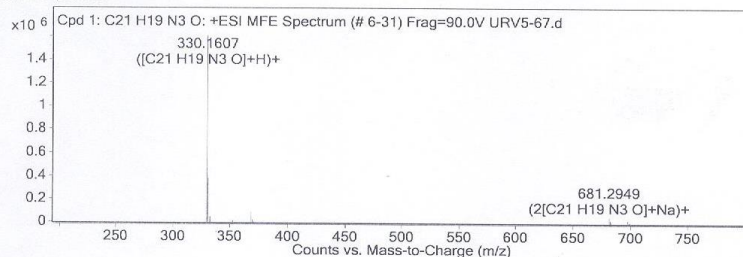

### MFE MS Zoomed Spectrum

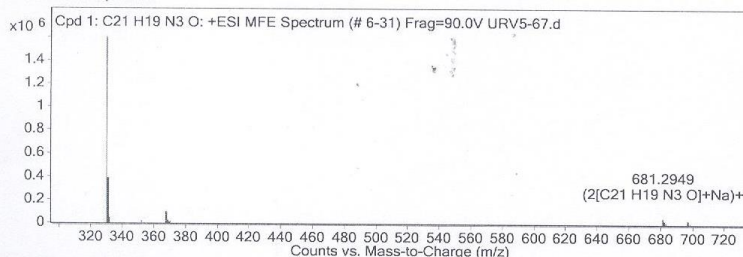

### MS Spectrum Peak List

| m/z      | z | Abund     | Formula      | Ion      |
|----------|---|-----------|--------------|----------|
| 330.1607 | 1 | 1605653   | C21 H19 N3 O | (M+H)+   |
| 331.1636 | 1 | 378299.55 | C21 H19 N3 O | (M+H)+   |
| 332.1664 | 1 | 45619.94  | C21 H19 N3 O | (M+H)+   |
| 352.1424 | 1 | 14614.36  | C21 H19 N3 O | (M+Na)+  |
| 368.116  | 1 | 93162.54  | C21 H19 N3 O | (M+K)+   |
| 369.1193 | 1 | 22353.53  | C21 H19 N3 O | (M+K)+   |
| 681.2949 | 1 | 48981.82  | C21 H19 N3 O | (2M+Na)+ |
| 682.2982 | 1 | 24242.31  | C21 H19 N3 O | (2M+Na)+ |
| 697.2691 | 1 | 24685.19  | C21 H19 N3 O | (2M+K)+  |
| 698.2711 | 1 | 11940.49  | C21 H19 N3 O | (2M+K)+  |

--- End Of Report ---

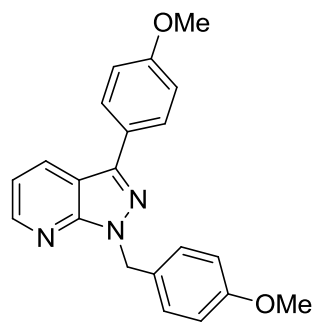

1-(4-methoxybenzyl)-3-(4-methoxyphenyl)-1H-pyrazolo[3,4-b]pyridine (**3n**)

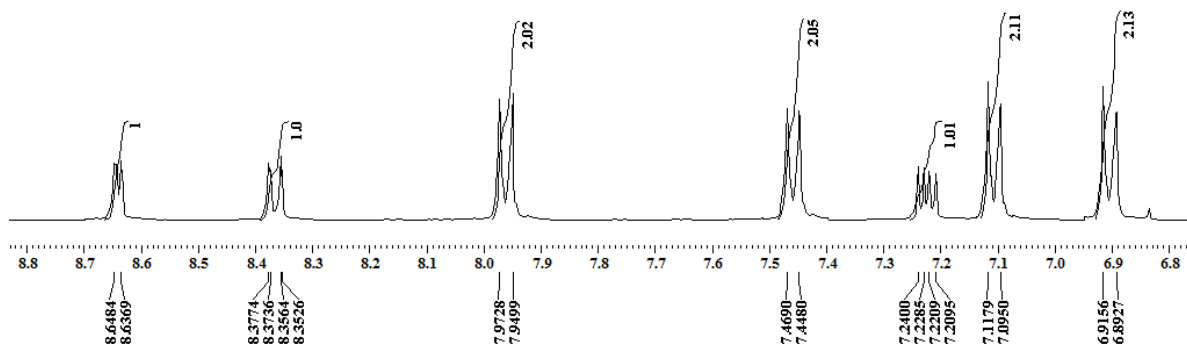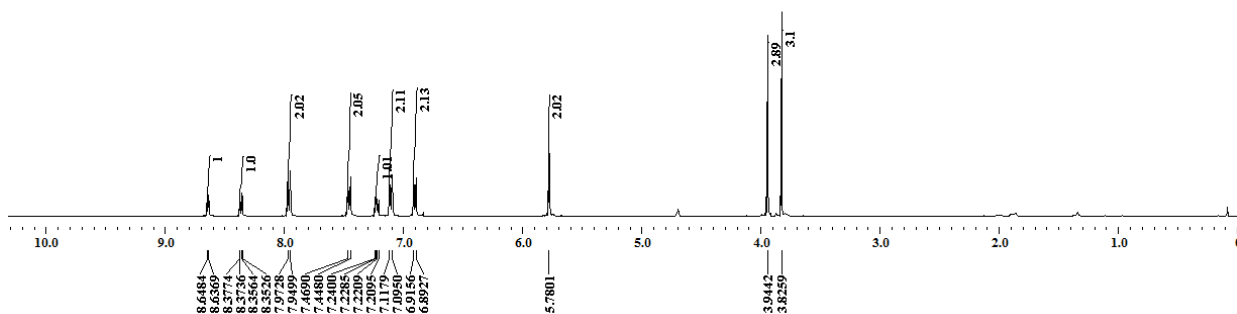

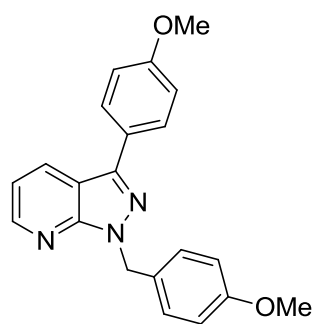

1-(4-methoxybenzyl)-3-(4-methoxyphenyl)-1H-pyrazolo[3,4-b]pyridine (3n)

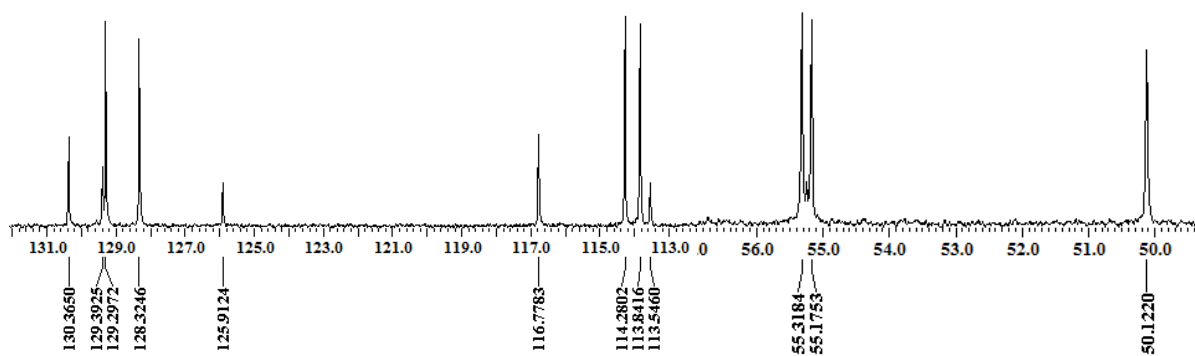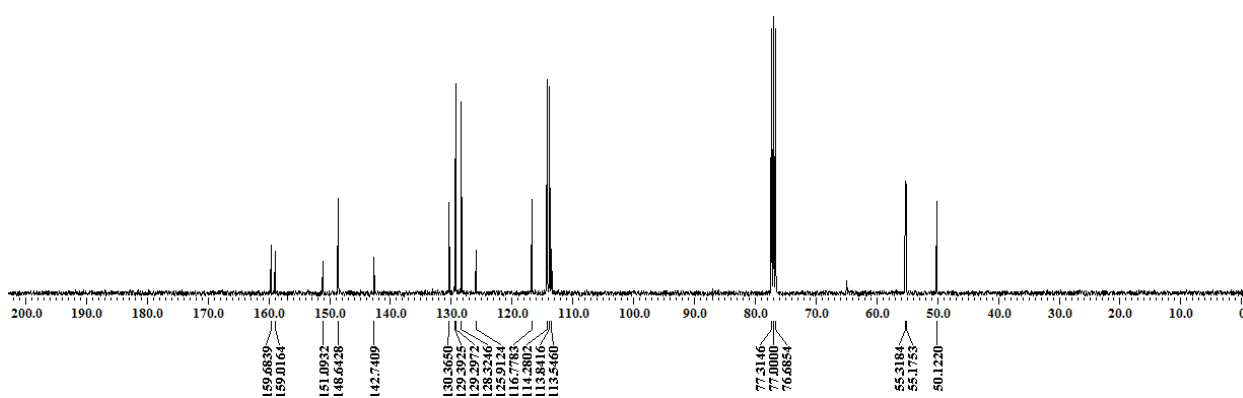

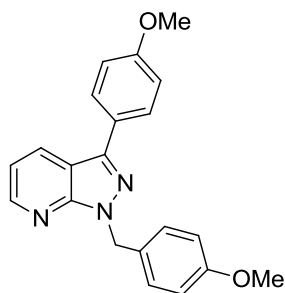

1-(4-methoxybenzyl)-3-(4-methoxyphenyl)-1H-pyrazolo[3,4-b]pyridine (**3n**)

## Qualitative Compound Report

|                        |              |               |                     |
|------------------------|--------------|---------------|---------------------|
| Data File              | URV5-68.d    | Sample Name   | URV5-68             |
| Sample Type            | Sample       | Position      | P1-A2               |
| Instrument Name        | Instrument 1 | User Name     |                     |
| Acq Method             | 29.10.2014.m | Acquired Time | 21-04-2017 13:58:02 |
| IRM Calibration Status | Success      | DA Method     | Default.m           |
| Comment                |              |               |                     |

Sample Group Info.  
 Acquisition SW 6200 series TOF/6500 series  
 Version Q-TOF B.05.01 (B5125)

### Compound Table

| Compound Label       | RT | Mass     | Formula       | MFG Formula   | MFG Diff (ppm) | DB Formula    |
|----------------------|----|----------|---------------|---------------|----------------|---------------|
| Cpd 2: C21 H19 N3 O2 | 10 | 345.1482 | C21 H19 N3 O2 | C21 H19 N3 O2 | -1.32          | C21 H19 N3 O2 |

| Compound Label       | m/z      | RT | Algorithm                 | Mass     |
|----------------------|----------|----|---------------------------|----------|
| Cpd 2: C21 H19 N3 O2 | 346.1555 | 10 | Find by Molecular Feature | 345.1482 |

### MFE MS Spectrum

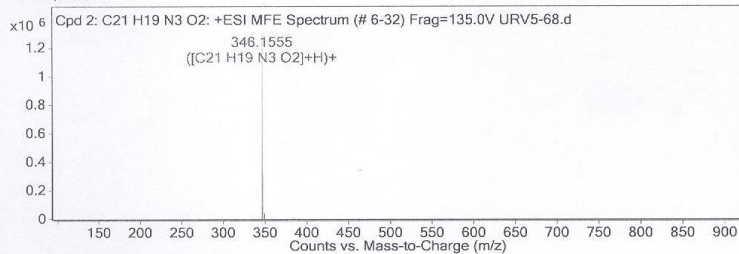

### MFE MS Zoomed Spectrum

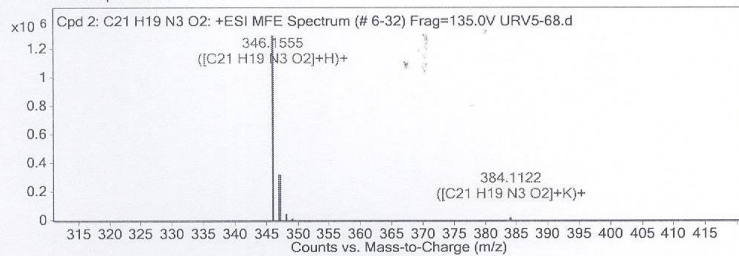

### MS Spectrum Peak List

| m/z      | z | Abund      | Formula       | Ion    |
|----------|---|------------|---------------|--------|
| 346.1555 | 1 | 1289776.63 | C21 H19 N3 O2 | (M+H)+ |
| 347.1584 | 1 | 309043.58  | C21 H19 N3 O2 | (M+H)+ |
| 348.1613 | 1 | 39045.37   | C21 H19 N3 O2 | (M+H)+ |
| 349.1696 | 1 | 4343.15    | C21 H19 N3 O2 | (M+H)+ |
| 350.1849 | 1 | 618.34     | C21 H19 N3 O2 | (M+H)+ |
| 384.1122 | 1 | 9947.79    | C21 H19 N3 O2 | (M+K)+ |
| 385.118  | 1 | 2495.26    | C21 H19 N3 O2 | (M+K)+ |
| 386.1115 | 1 | 1173.98    | C21 H19 N3 O2 | (M+K)+ |

--- End Of Report ---



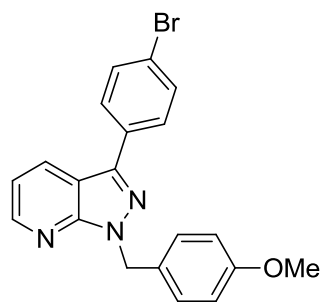

3-(4-bromophenyl)-1-(4-methoxybenzyl)-1*H*-pyrazolo[3,4-*b*]pyridine (**3o**)

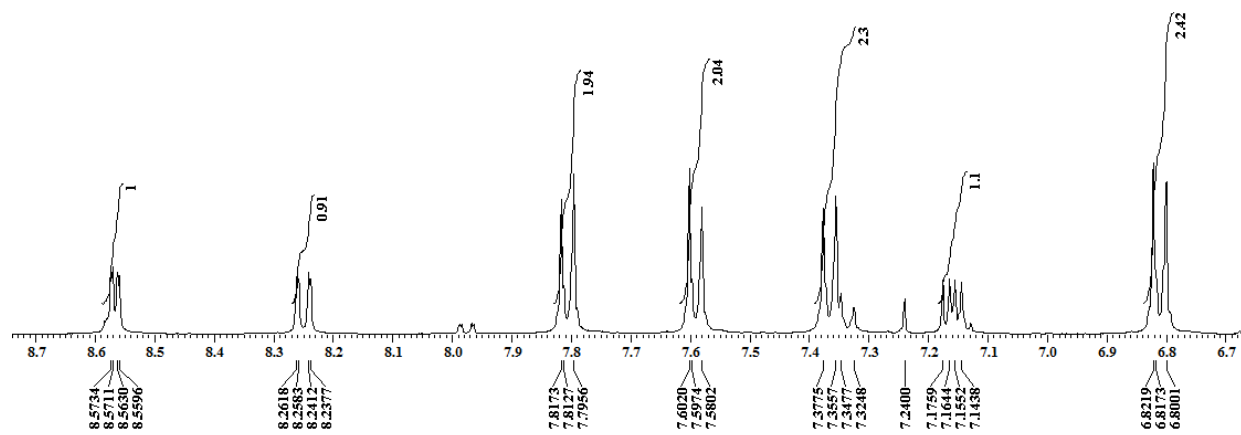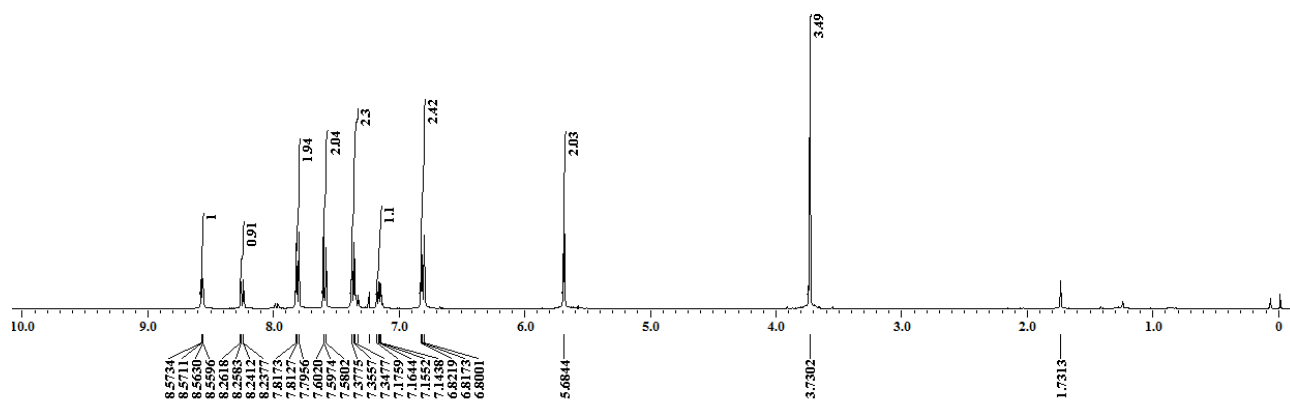



3-(4-bromophenyl)-1-(4-methoxybenzyl)-1*H*-pyrazolo[3,4-*b*]pyridine (**3o**)

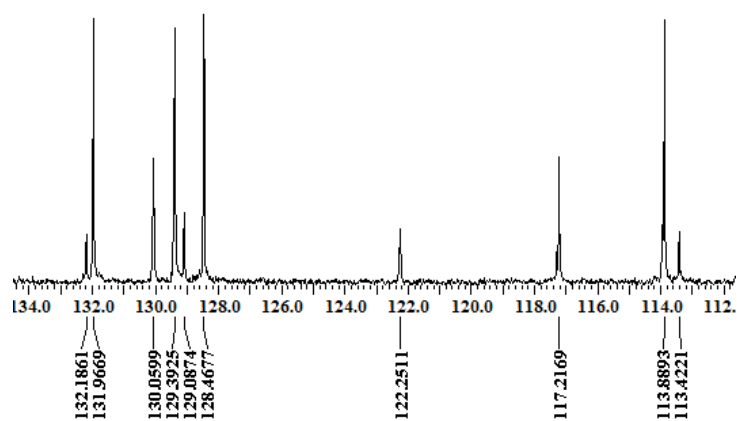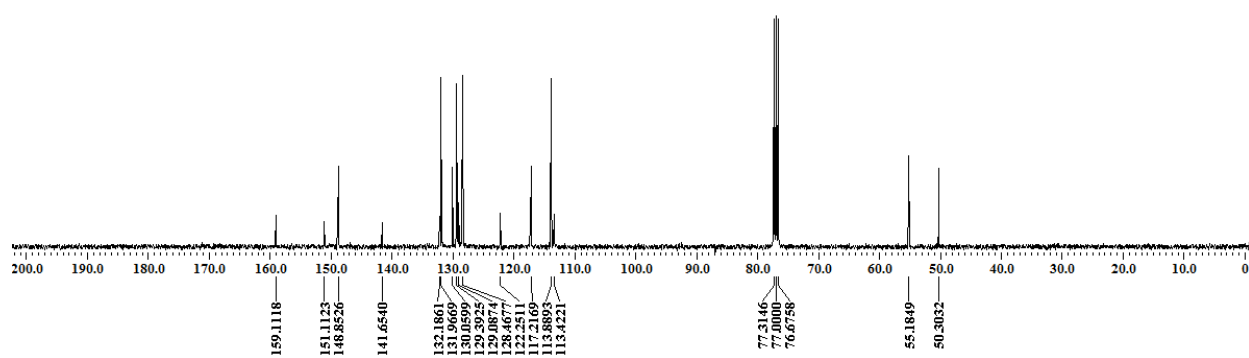

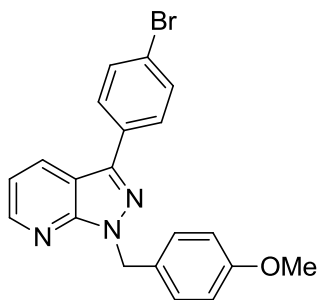

3-(4-bromophenyl)-1-(4-methoxybenzyl)-1H-pyrazolo[3,4-b]pyridine (**3o**)

### Qualitative Compound Report

|                               |              |                      |                     |
|-------------------------------|--------------|----------------------|---------------------|
| <b>Data File</b>              | URV5-78.d    | <b>Sample Name</b>   | URV5-78             |
| <b>Sample Type</b>            | Sample       | <b>Position</b>      | P1-B8               |
| <b>Instrument Name</b>        | Instrument 1 | <b>User Name</b>     |                     |
| <b>Acq Method</b>             | 29.10.2014.m | <b>Acquired Time</b> | 04-05-2017 13:39:23 |
| <b>IRM Calibration Status</b> | Success      | <b>DA Method</b>     | Default.m           |
| <b>Comment</b>                |              |                      |                     |

|                       |                             |              |
|-----------------------|-----------------------------|--------------|
| <b>Sample Group</b>   |                             | <b>Info.</b> |
| <b>Acquisition SW</b> | 6200 series TOF/6500 series |              |
| <b>Version</b>        | Q-TOF B.05.01 (B5125)       |              |

#### Compound Table

| Compound Label          | RT | Mass     | Formula         | MFG Formula     | MFG Diff (ppm) | DB Formula      |
|-------------------------|----|----------|-----------------|-----------------|----------------|-----------------|
| Cpd 25: C20 H16 Br N3 O | 11 | 393.0473 | C20 H16 Br N3 O | C20 H16 Br N3 O | 0.9            | C20 H16 Br N3 O |

| Compound Label          | m/z      | RT | Algorithm                 | Mass     |
|-------------------------|----------|----|---------------------------|----------|
| Cpd 25: C20 H16 Br N3 O | 394.0546 | 11 | Find by Molecular Feature | 393.0473 |

#### MFE MS Spectrum

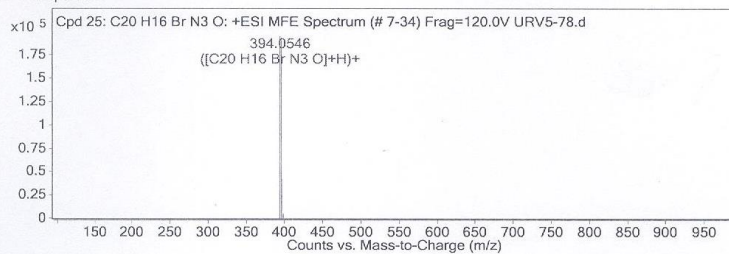

#### MFE MS Zoomed Spectrum

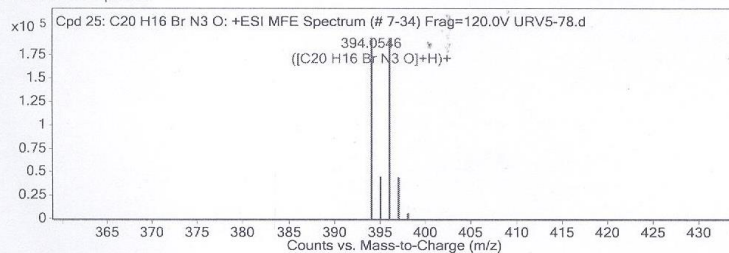

#### MS Spectrum Peak List

| m/z      | z | Abund     | Formula         | Ion    |
|----------|---|-----------|-----------------|--------|
| 394.0546 | 1 | 195572.84 | C20 H16 Br N3 O | (M+H)+ |
| 395.0576 | 1 | 42915.55  | C20 H16 Br N3 O | (M+H)+ |
| 396.0528 | 1 | 193829.16 | C20 H16 Br N3 O | (M+H)+ |
| 397.0555 | 1 | 41997.89  | C20 H16 Br N3 O | (M+H)+ |
| 398.0588 | 1 | 5082.82   | C20 H16 Br N3 O | (M+H)+ |
| 399.0584 | 1 | 141.5     | C20 H16 Br N3 O | (M+H)+ |

--- End Of Report ---

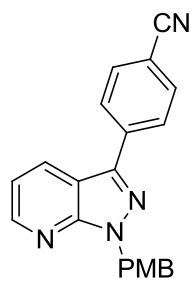

4-(1-(4-methoxybenzyl)-1*H*-pyrazolo[3,4-*b*]pyridin-3-yl)benzonitrile (**3p**)

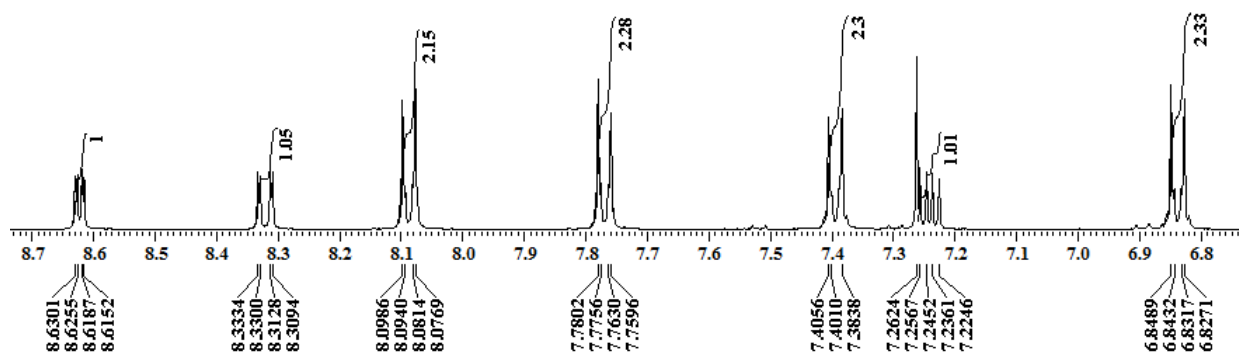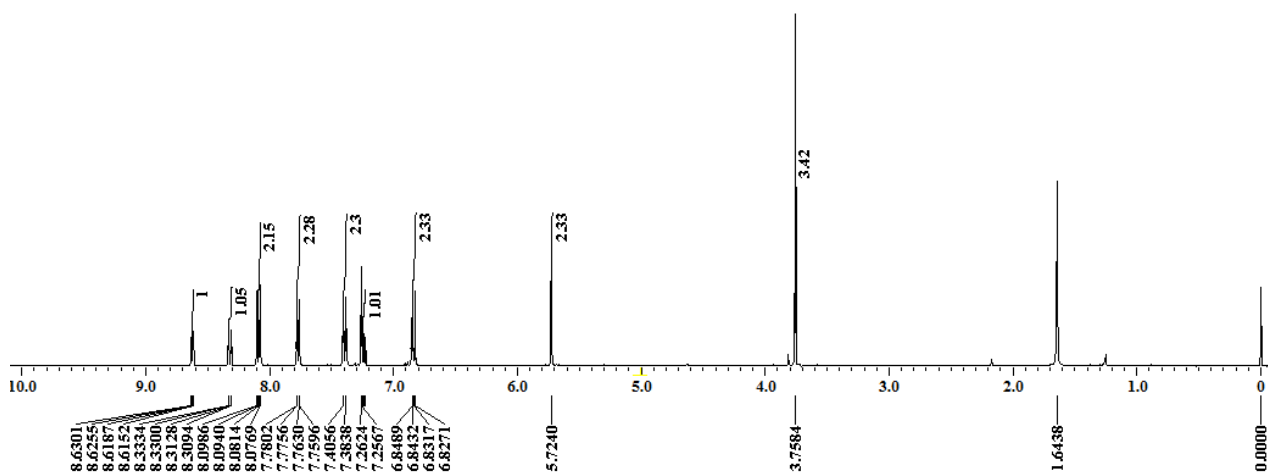

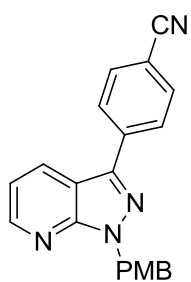

4-(1-(4-methoxybenzyl)-1H-pyrazolo[3,4-b]pyridin-3-yl)benzonitrile (**3p**)

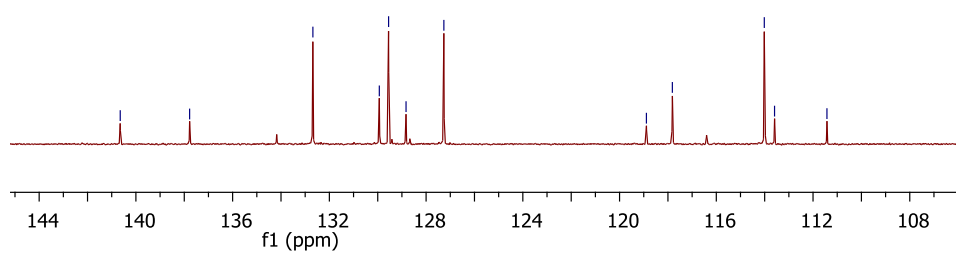

D:  
13 C URV5-128

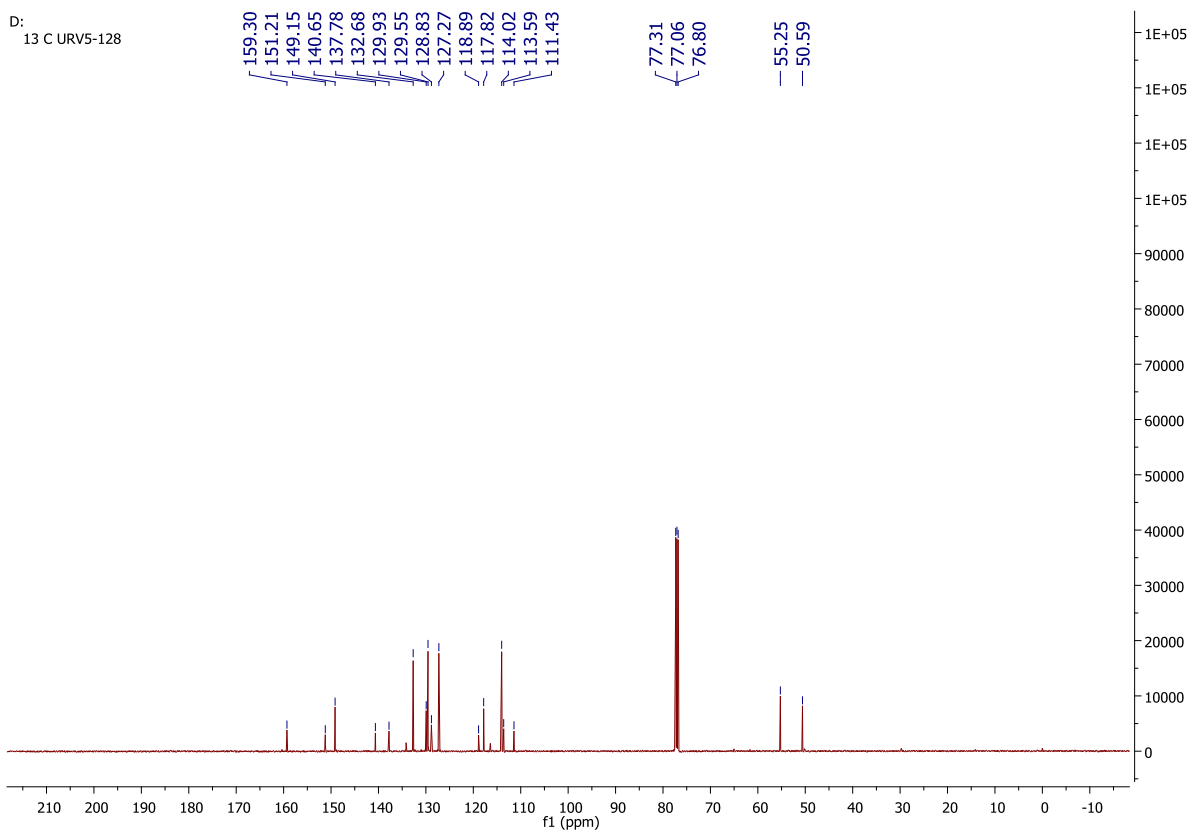

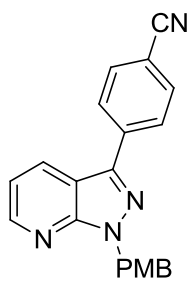

4-(1-(4-methoxybenzyl)-1H-pyrazolo[3,4-b]pyridin-3-yl)benzonitrile (**3p**)

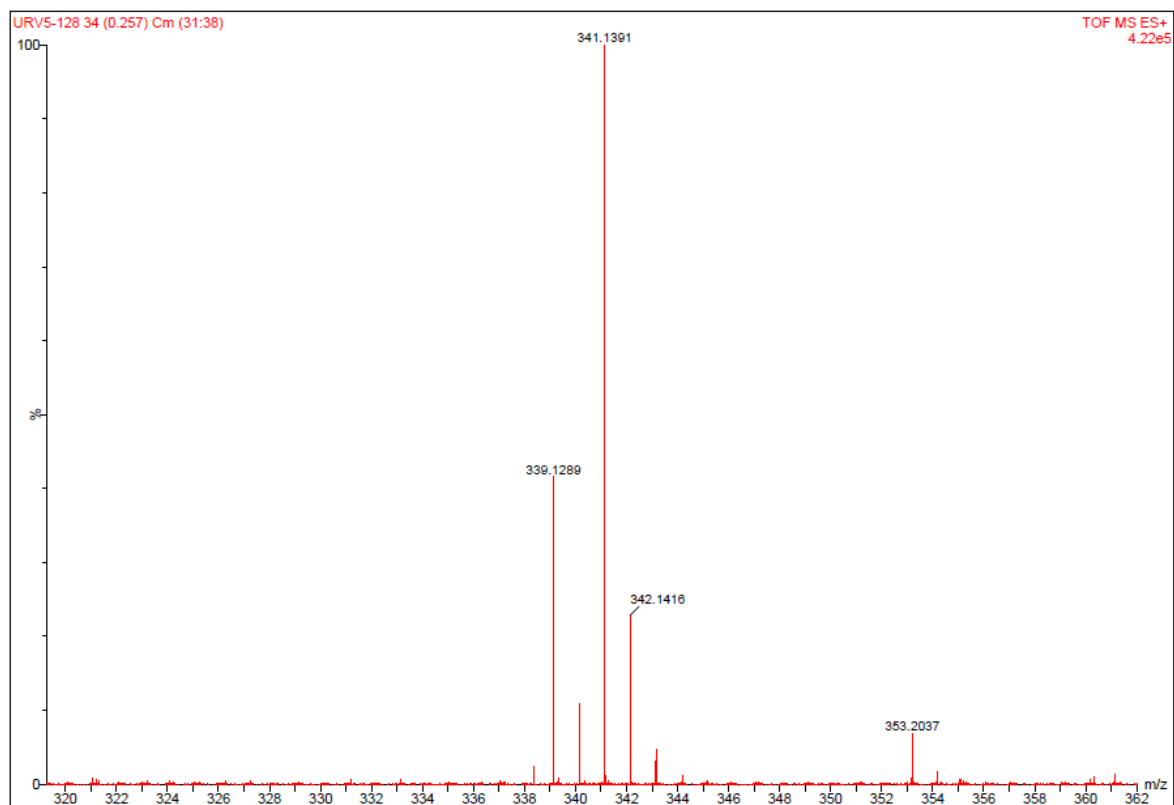

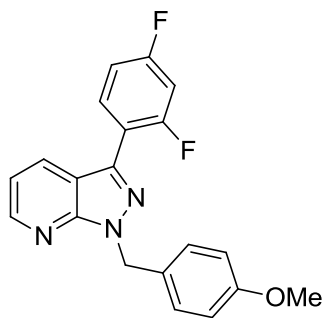

3-(2,4-difluorophenyl)-1-(4-methoxybenzyl)-1*H*-pyrazolo[3,4-*b*]pyridine (**3q**)

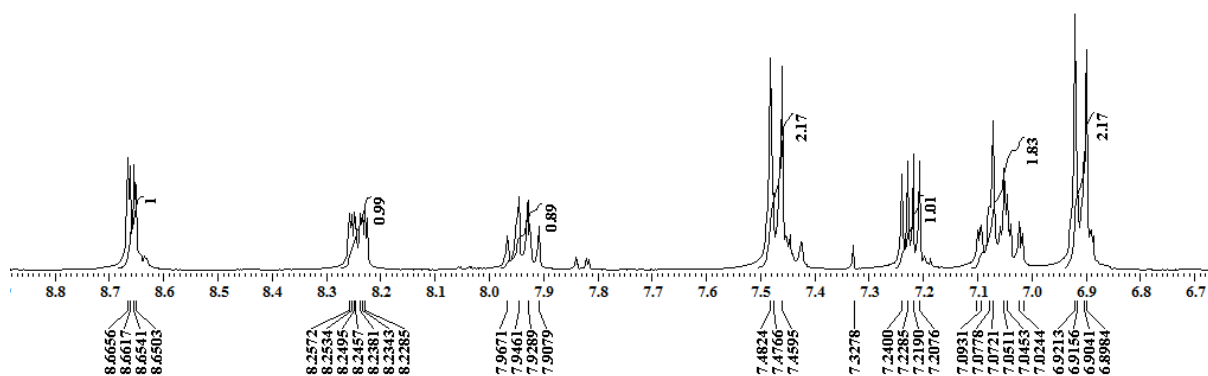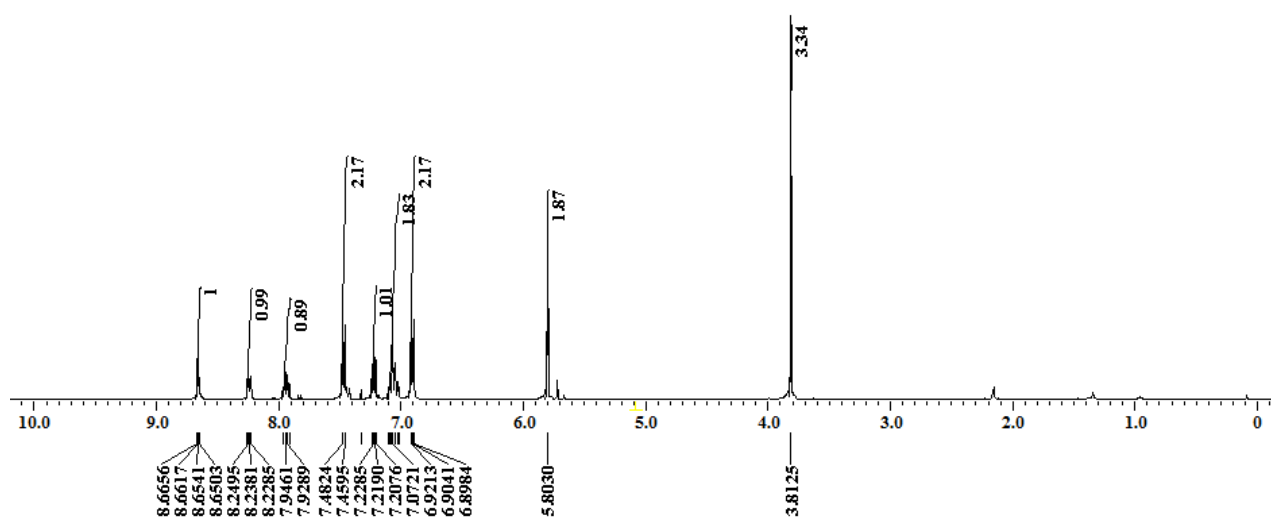

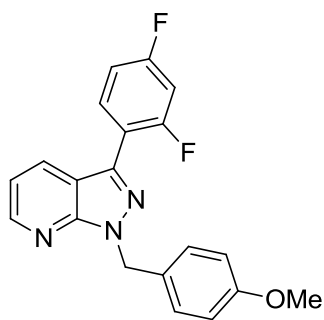

3-(2,4-difluorophenyl)-1-(4-methoxybenzyl)-1*H*-pyrazolo[3,4-*b*]pyridine (**3q**)

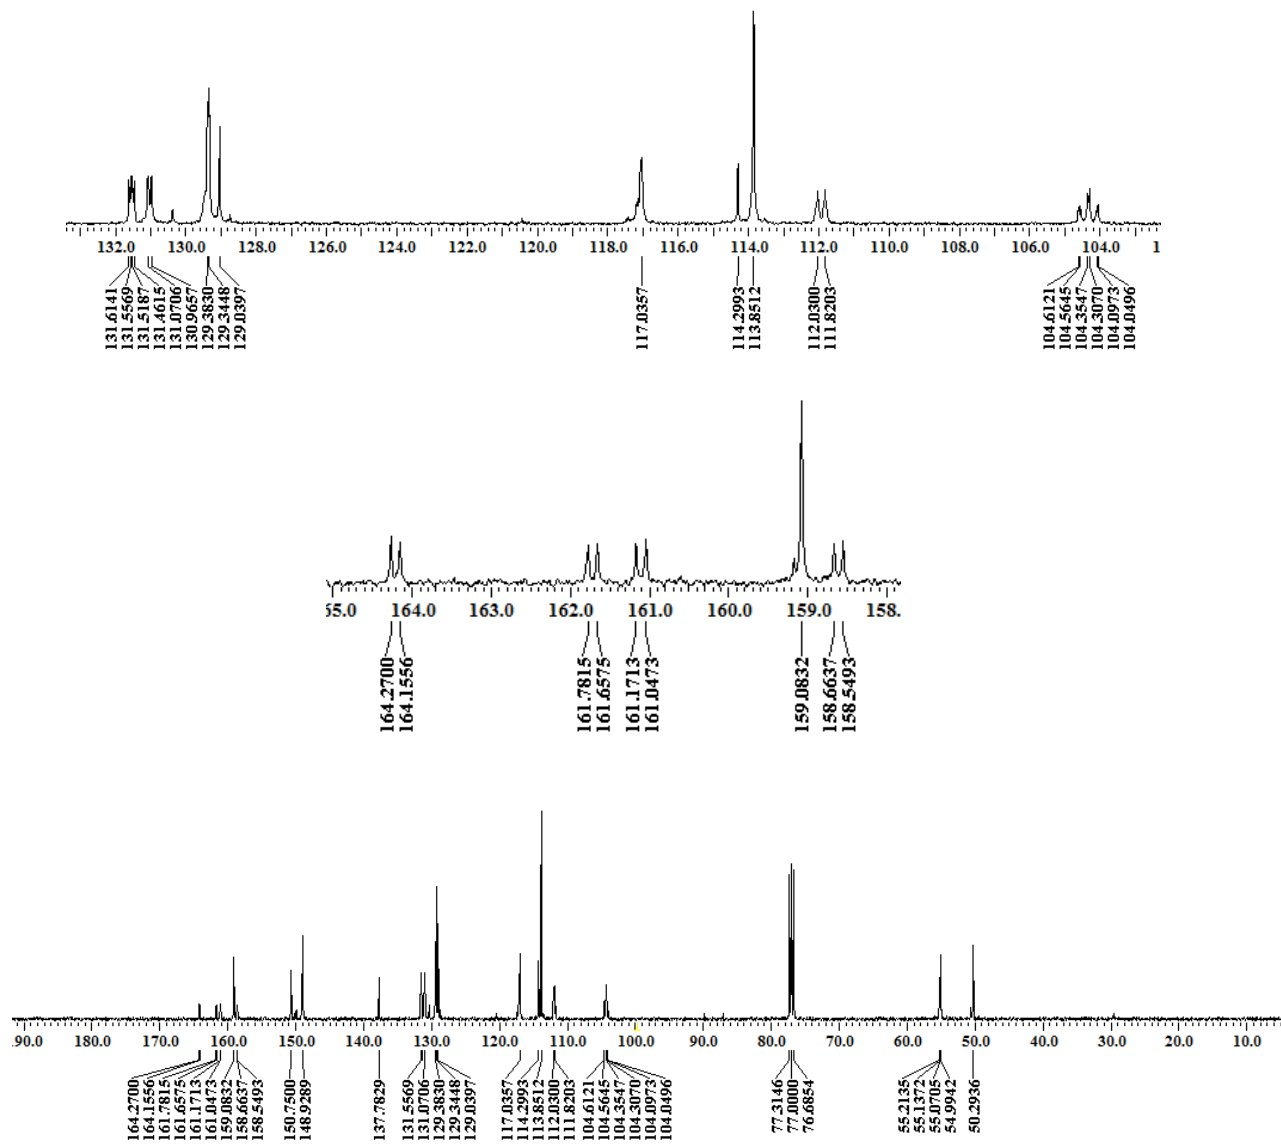



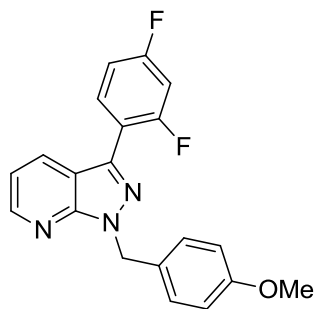

3-(2,4-difluorophenyl)-1-(4-methoxybenzyl)-1H-pyrazolo[3,4-b]pyridine (**3q**)

### Qualitative Compound Report

|                        |              |               |                     |
|------------------------|--------------|---------------|---------------------|
| Data File              | URV-57.d     | Sample Name   | URV-57              |
| Sample Type            | Sample       | Position      | P1-A3               |
| Instrument Name        | Instrument 1 | User Name     |                     |
| Acq Method             | 29.10.2014.m | Acquired Time | 28-03-2017 12:25:33 |
| IRM Calibration Status | Success      | DA Method     | Default.m           |
| Comment                |              |               |                     |

|                |                             |       |
|----------------|-----------------------------|-------|
| Sample Group   |                             | Info. |
| Acquisition SW | 6200 series TOF/6500 series |       |
| Version        | Q-TOF B.05.01 (B5125)       |       |

#### Compound Table

| Compound Label         | RT | Mass     | Formula         | MFG Formula     | MFG Diff (ppm) | DB Formula      |
|------------------------|----|----------|-----------------|-----------------|----------------|-----------------|
| Cpd 1: C20 H15 F2 N3 O | 11 | 351.1187 | C20 H15 F2 N3 O | C20 H15 F2 N3 O | -1.01          | C20 H15 F2 N3 O |

| Compound Label         | m/z      | RT | Algorithm                 | Mass     |
|------------------------|----------|----|---------------------------|----------|
| Cpd 1: C20 H15 F2 N3 O | 352.1265 | 11 | Find by Molecular Feature | 351.1187 |

#### MFE MS Spectrum

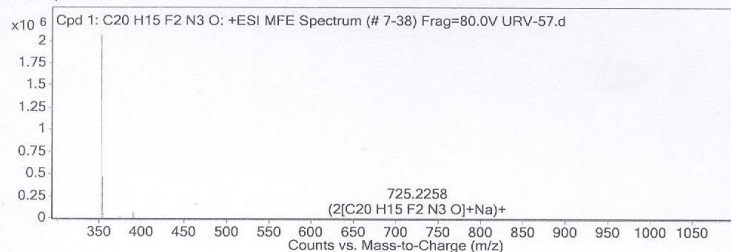

#### MFE MS Zoomed Spectrum

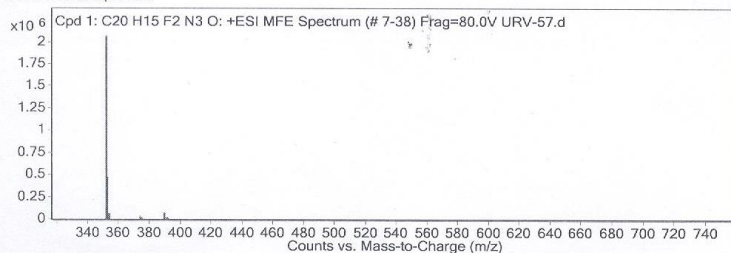

#### MS Spectrum Peak List

| m/z      | z | Abund     | Formula         | Ion      |
|----------|---|-----------|-----------------|----------|
| 352.1265 | 1 | 2070263.5 | C20 H15 F2 N3 O | (M+H)+   |
| 353.1295 | 1 | 468027.3  | C20 H15 F2 N3 O | (M+H)+   |
| 354.1322 | 1 | 52484.76  | C20 H15 F2 N3 O | (M+H)+   |
| 355.1353 | 1 | 4457.63   | C20 H15 F2 N3 O | (M+H)+   |
| 374.108  | 1 | 26806.63  | C20 H15 F2 N3 O | (M+Na)+  |
| 375.1109 | 1 | 6365.49   | C20 H15 F2 N3 O | (M+Na)+  |
| 390.0823 | 1 | 65581.3   | C20 H15 F2 N3 O | (M+K)+   |
| 391.0856 | 1 | 15535.42  | C20 H15 F2 N3 O | (M+K)+   |
| 392.0841 | 1 | 5974.42   | C20 H15 F2 N3 O | (M+K)+   |
| 725.2258 | 1 | 2441.97   | C20 H15 F2 N3 O | (2M+Na)+ |

--- End Of Report ---

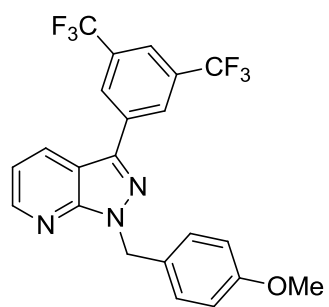

3-(3,5-bis(trifluoromethyl)phenyl)-1-(4-methoxybenzyl)-1H-pyrazolo[3,4-b]pyridine (**3r**)

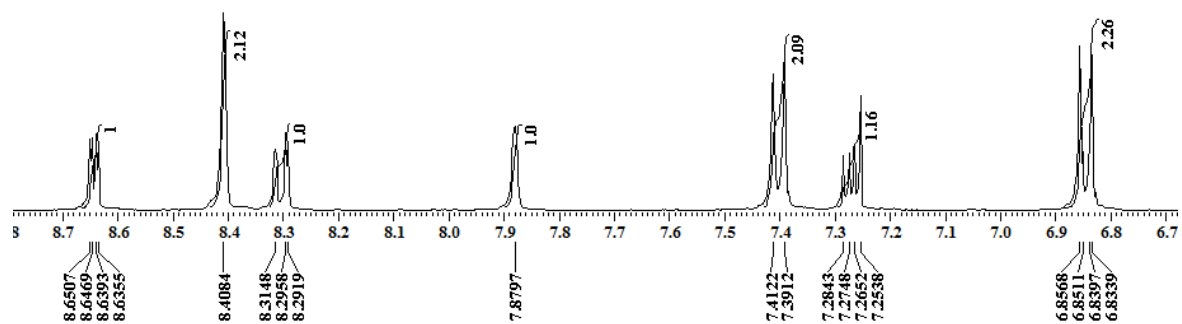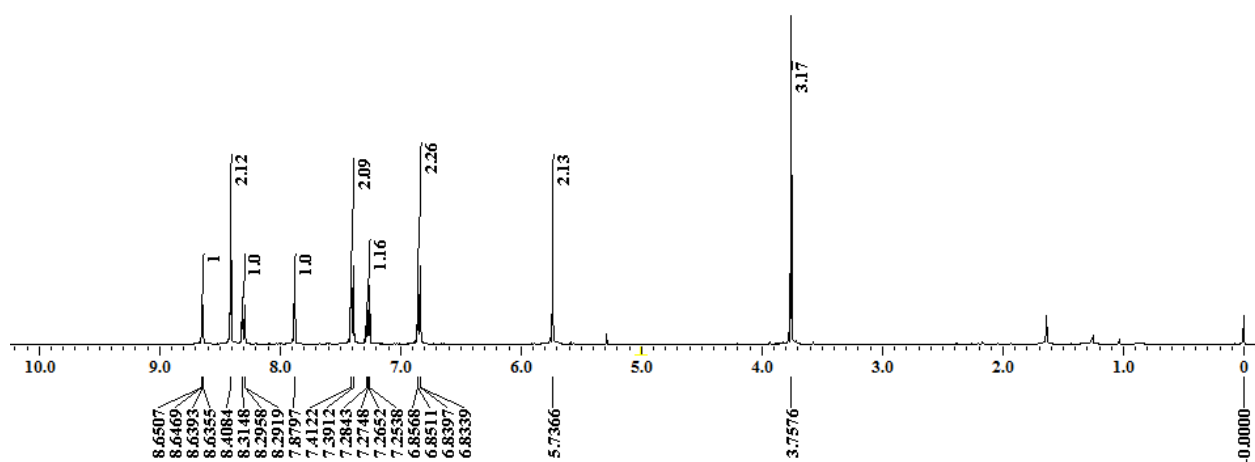



3-(3,5-bis(trifluoromethyl)phenyl)-1-(4-methoxybenzyl)-1*H*-pyrazolo[3,4-*b*]pyridine (**3r**)

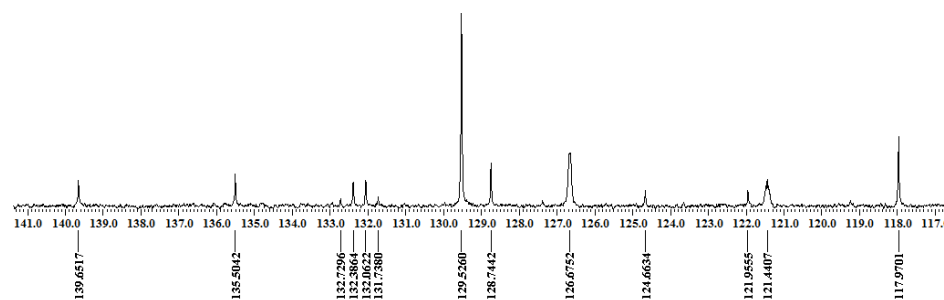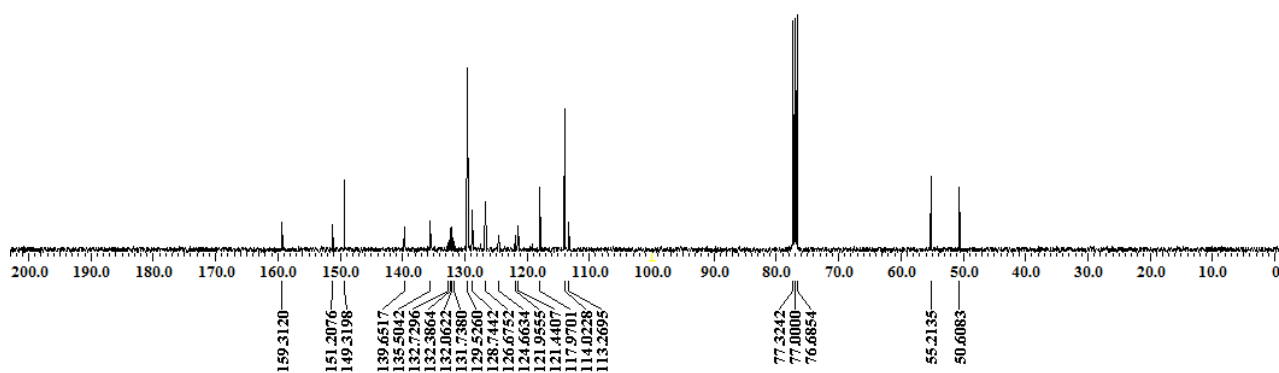

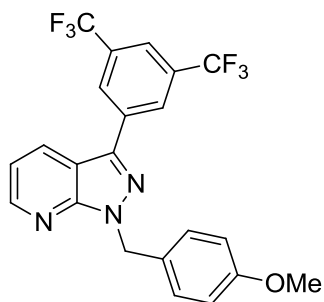

3-(3,5-bis(trifluoromethyl)phenyl)-1-(4-methoxybenzyl)-1H-pyrazolo[3,4-b]pyridine (**3r**)

## Qualitative Compound Report

|                               |              |                      |                     |
|-------------------------------|--------------|----------------------|---------------------|
| <b>Data File</b>              | URV5-53FI.d  | <b>Sample Name</b>   | URV5-53FI           |
| <b>Sample Type</b>            | Sample       | <b>Position</b>      | P1-B2               |
| <b>Instrument Name</b>        | Instrument 1 | <b>User Name</b>     |                     |
| <b>Acq Method</b>             | 29.10.2014.m | <b>Acquired Time</b> | 24-04-2017 13:07:06 |
| <b>IRM Calibration Status</b> | Success      | <b>DA Method</b>     | Default.m           |
| <b>Comment</b>                |              |                      |                     |

|                       |                             |              |
|-----------------------|-----------------------------|--------------|
| <b>Sample Group</b>   |                             | <b>Info.</b> |
| <b>Acquisition SW</b> | 6200 series TOF/6500 series |              |
| <b>Version</b>        | Q-TOF B.05.01 (B5125)       |              |

### Compound Table

| Compound Label          | RT | Mass     | Formula         | MFG Formula     | MFG Diff (ppm) | DB Formula      |
|-------------------------|----|----------|-----------------|-----------------|----------------|-----------------|
| Cpd 20: C22 H15 F6 N3 O | 12 | 451.1122 | C22 H15 F6 N3 O | C22 H15 F6 N3 O | -0.56          | C22 H15 F6 N3 O |

| Compound Label          | m/z      | RT | Algorithm                 | Mass     |
|-------------------------|----------|----|---------------------------|----------|
| Cpd 20: C22 H15 F6 N3 O | 452.1191 | 12 | Find by Molecular Feature | 451.1122 |

### MFE MS Spectrum

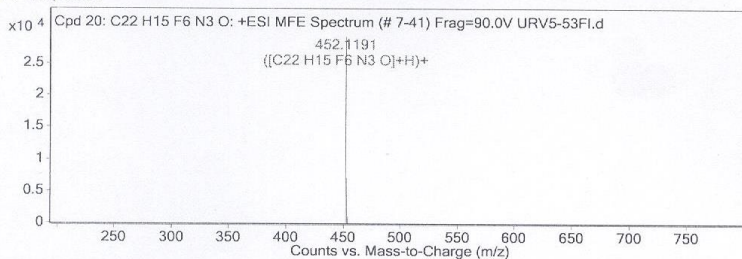

### MFE MS Zoomed Spectrum

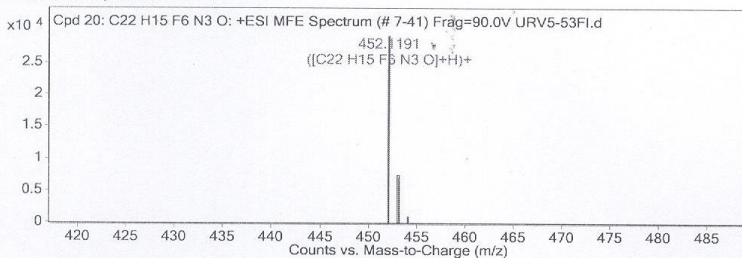

### MS Spectrum Peak List

| m/z      | z | Abund    | Formula         | Ion    |
|----------|---|----------|-----------------|--------|
| 452.1191 | 1 | 29204.81 | C22 H15 F6 N3 O | (M+H)+ |
| 453.1236 | 1 | 7108.65  | C22 H15 F6 N3 O | (M+H)+ |
| 454.1289 | 1 | 1073.09  | C22 H15 F6 N3 O | (M+H)+ |

--- End Of Report ---

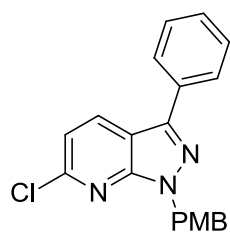

6-chloro-1-(4-methoxybenzyl)-3-phenyl-1*H*-pyrazolo[3,4-*b*]pyridine (**3s**)

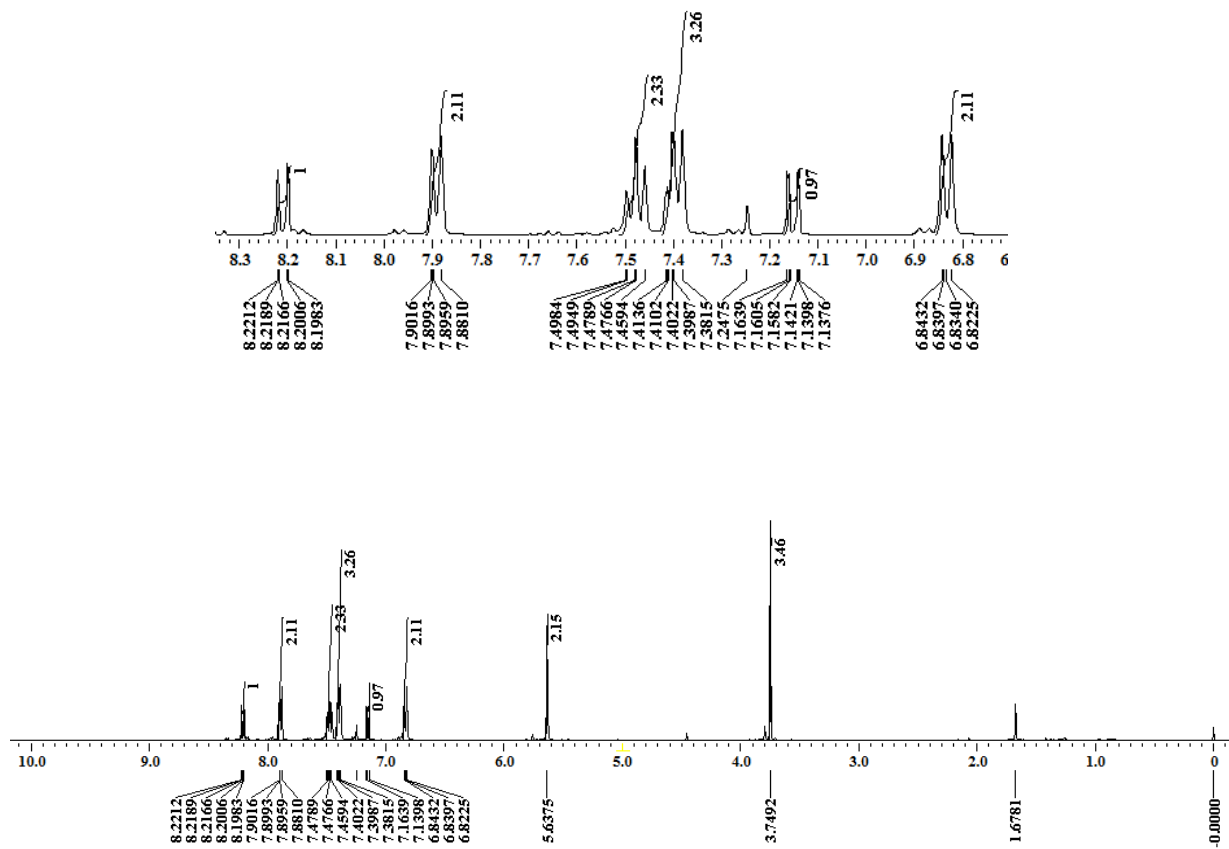

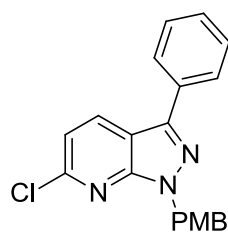

6-chloro-1-(4-methoxybenzyl)-3-phenyl-1H-pyrazolo[3,4-b]pyridine (3s)

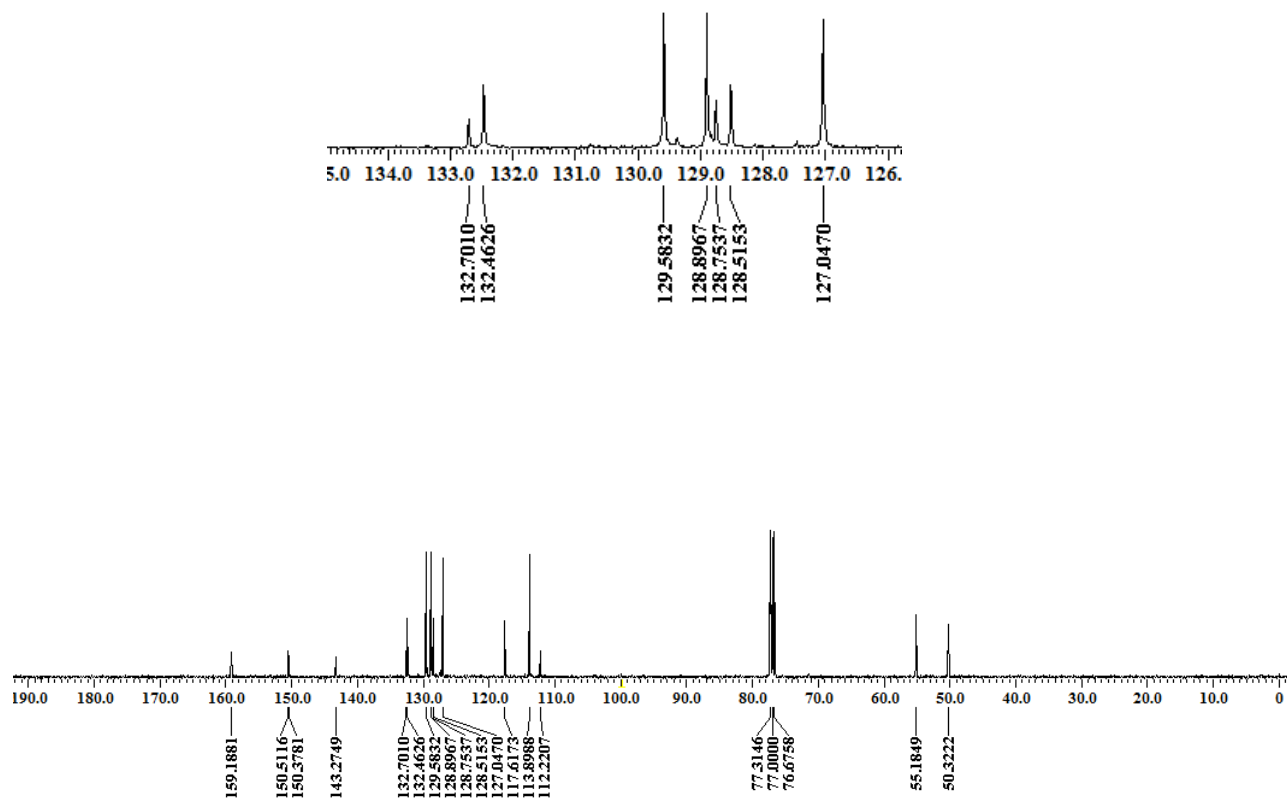



6-chloro-1-(4-methoxybenzyl)-3-phenyl-1H-pyrazolo[3,4-b]pyridine (**3s**)

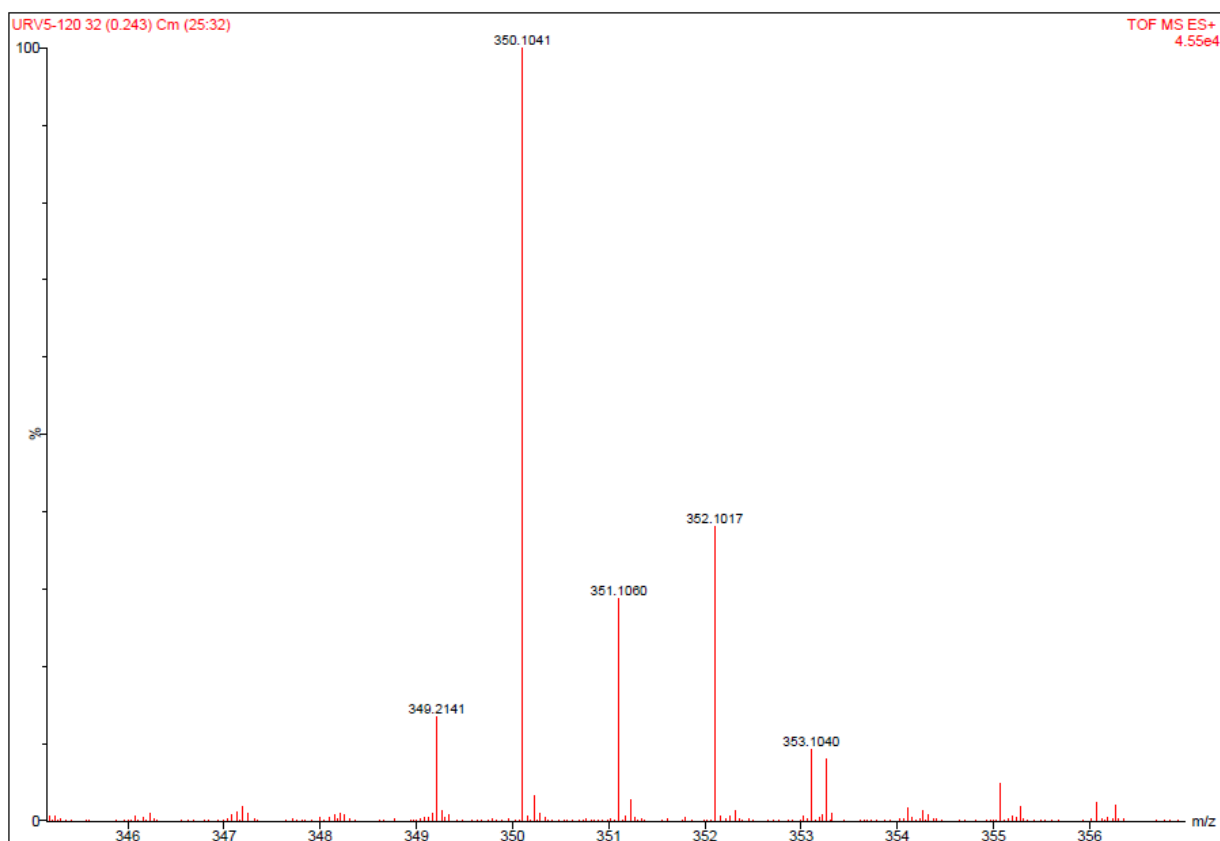

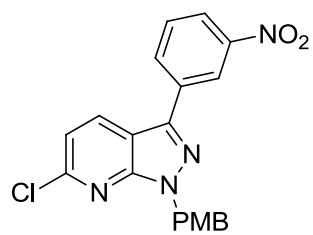

6-chloro-1-(4-methoxybenzyl)-3-(3-nitrophenyl)-1H-pyrazolo[3,4-b]pyridine (**3t**)

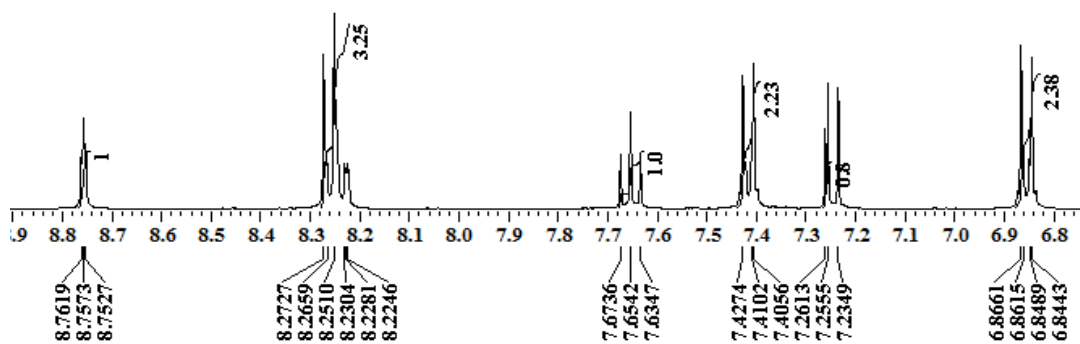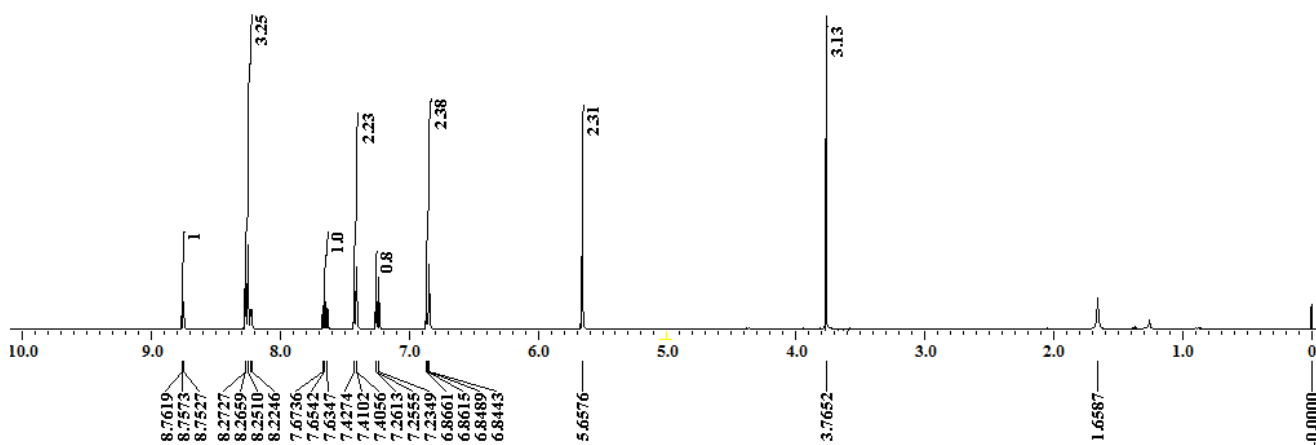



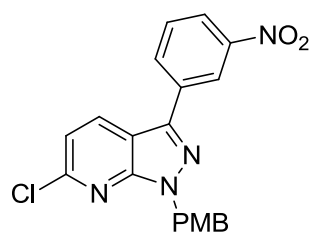

6-chloro-1-(4-methoxybenzyl)-3-(3-nitrophenyl)-1*H*-pyrazolo[3,4-*b*]pyridine (**3t**)

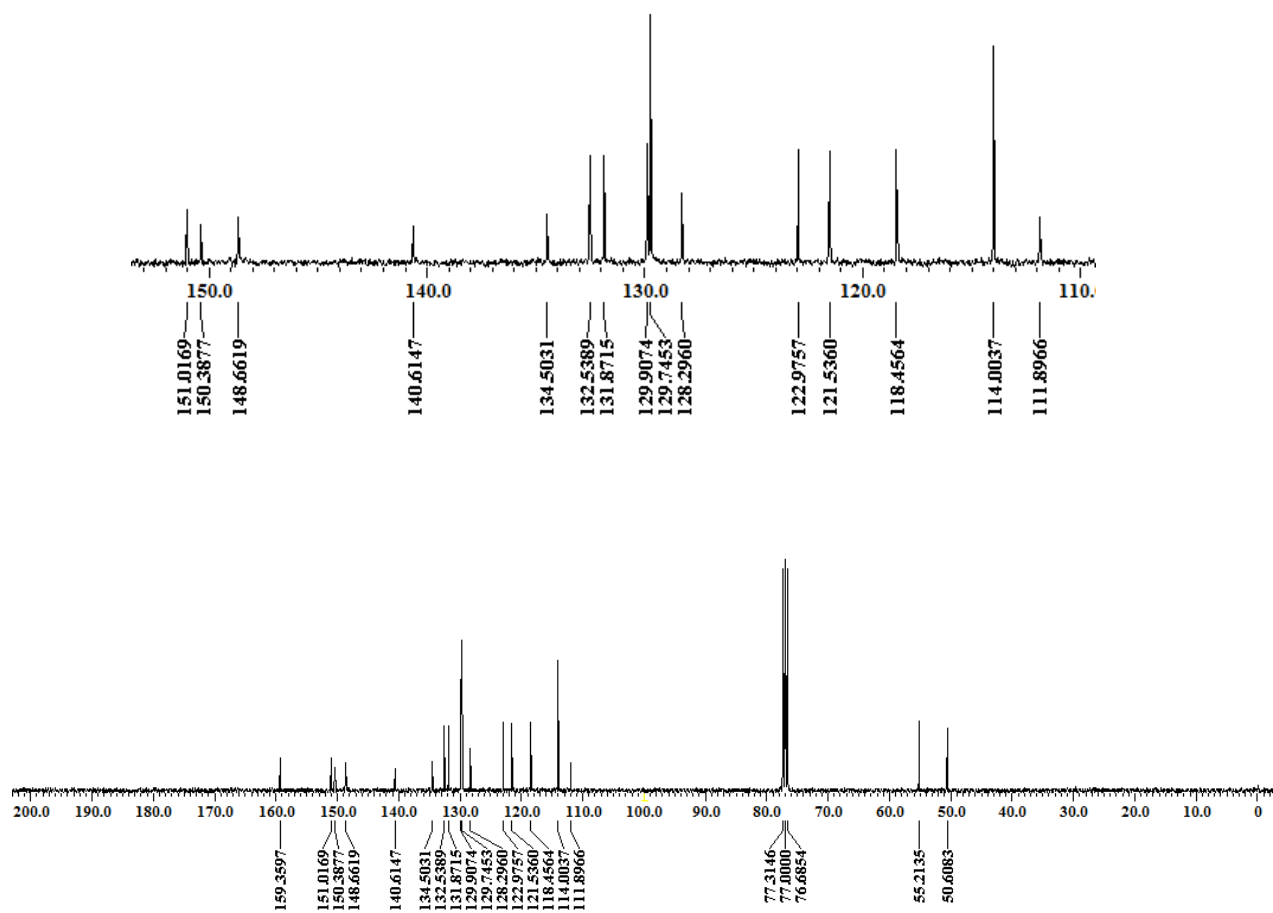

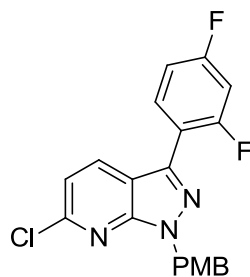

6-chloro-3-(2,4-difluorophenyl)-1-(4-methoxybenzyl)-1H-pyrazolo[3,4-b]pyridine (**3u**)

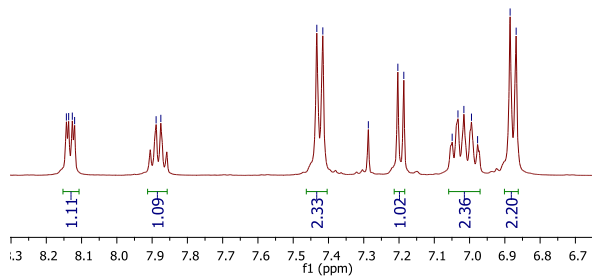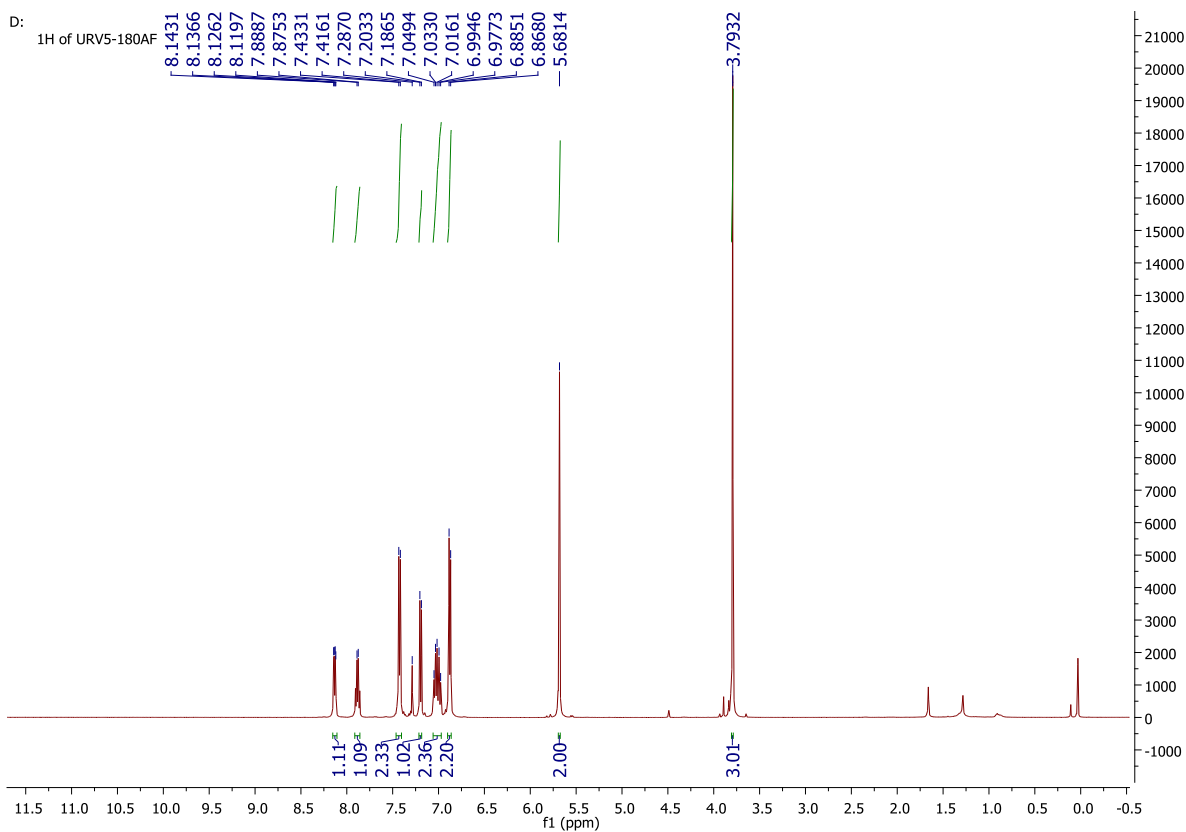

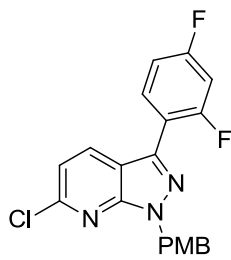

6-chloro-3-(2,4-difluorophenyl)-1-(4-methoxybenzyl)-1H-pyrazolo[3,4-b]pyridine (**3u**)

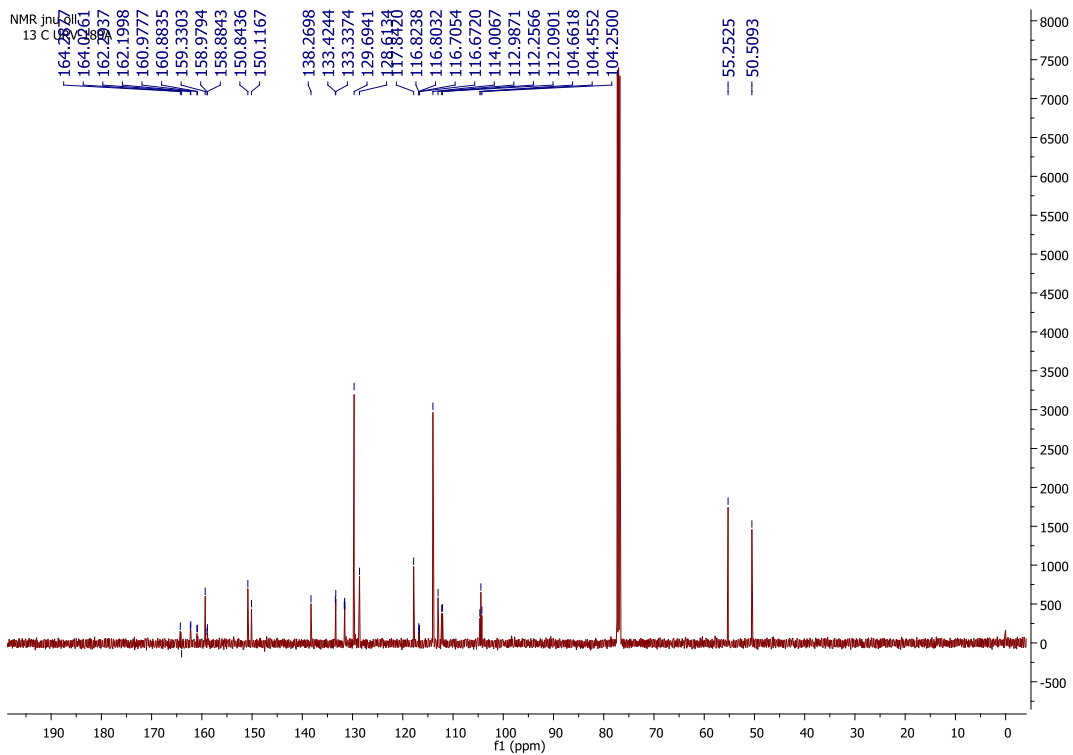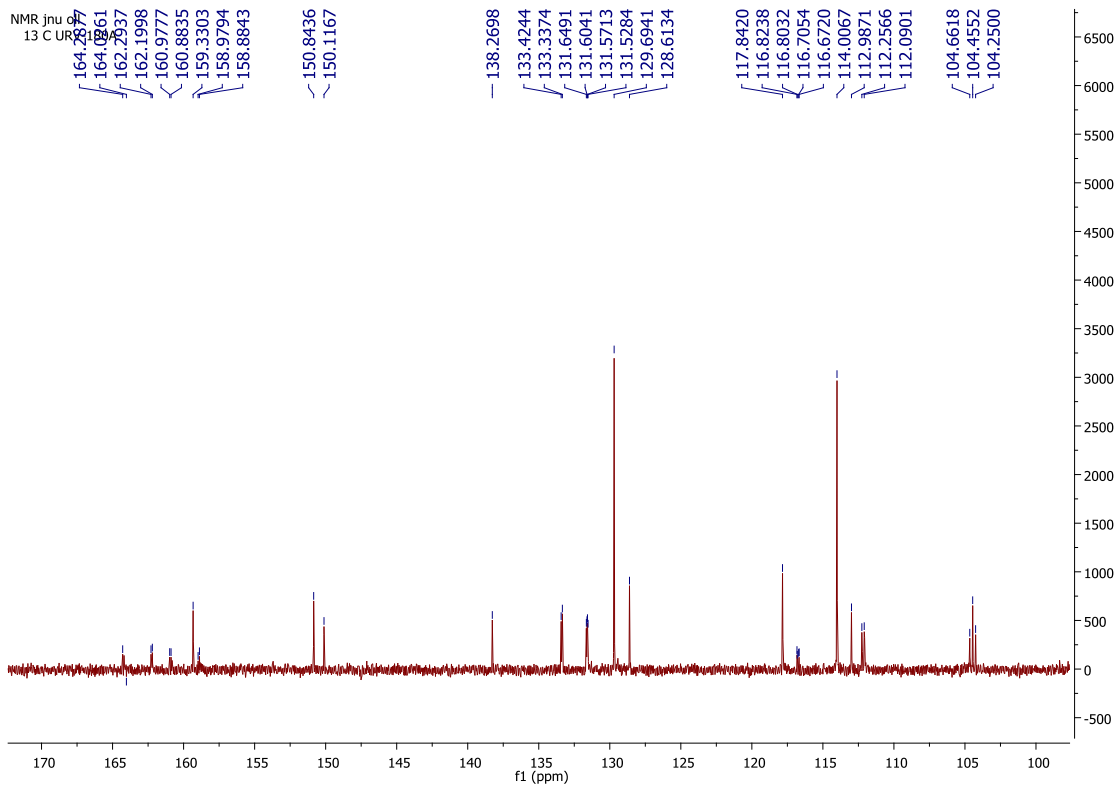

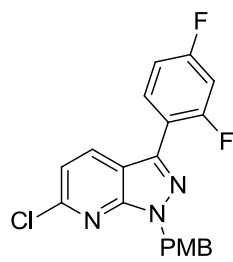

6-chloro-3-(2,4-difluorophenyl)-1-(4-methoxybenzyl)-1*H*-pyrazolo[3,4-*b*]pyridine (**3u**)

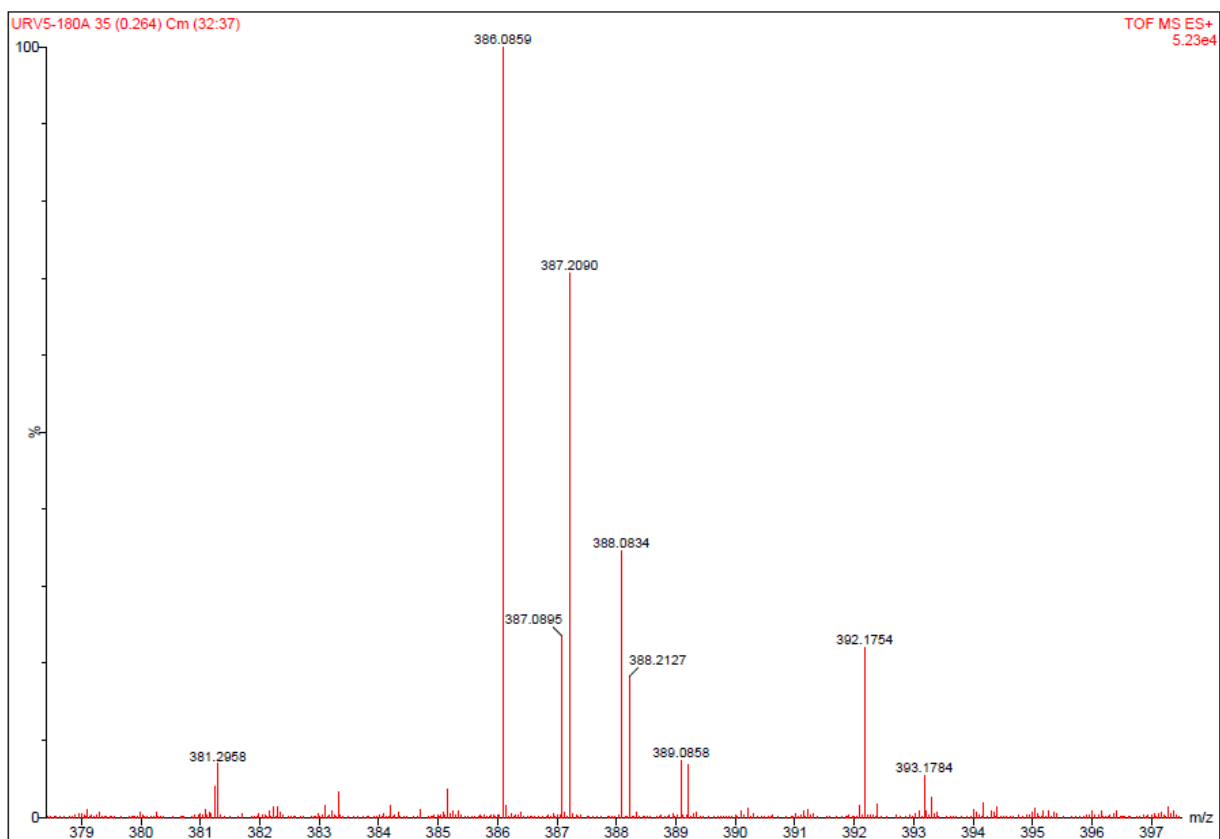

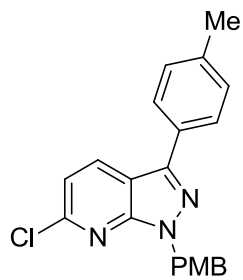

6-chloro-1-(4-methoxybenzyl)-3-(*p*-tolyl)-1*H*-pyrazolo[3,4-*b*]pyridine (**3v**)

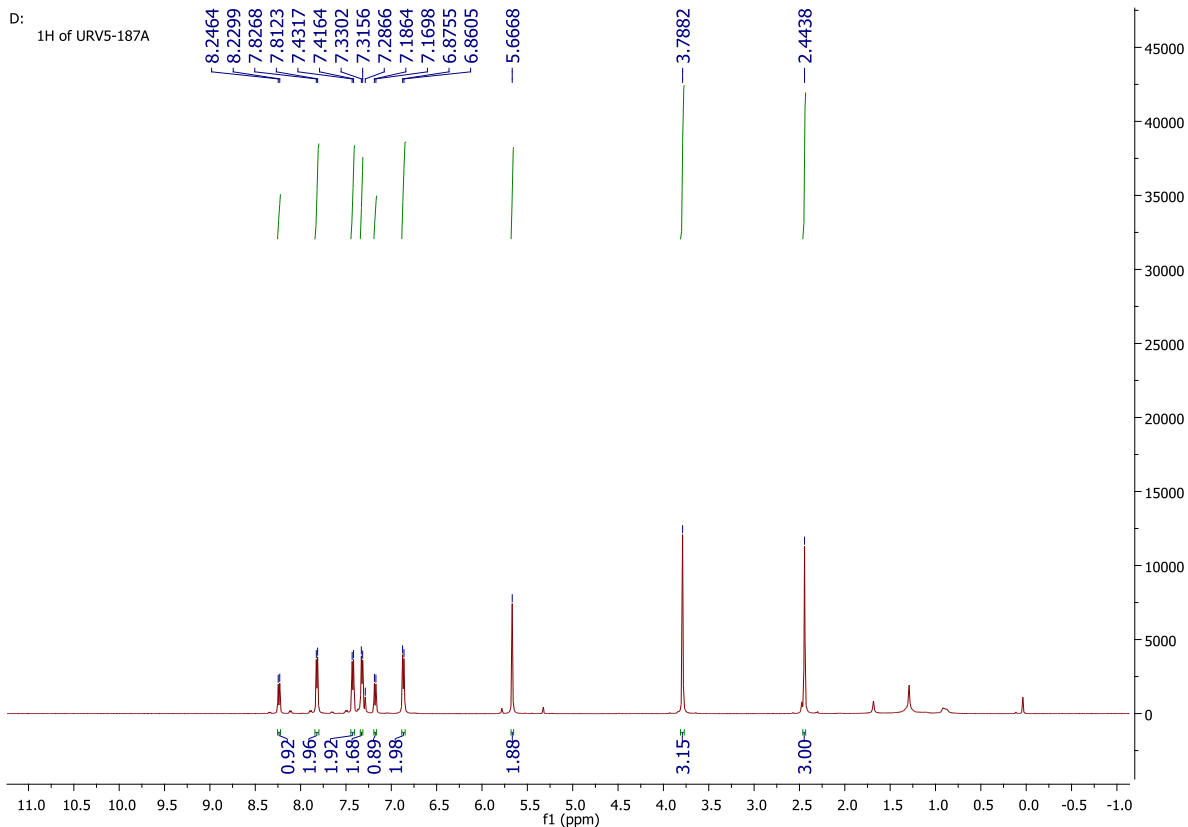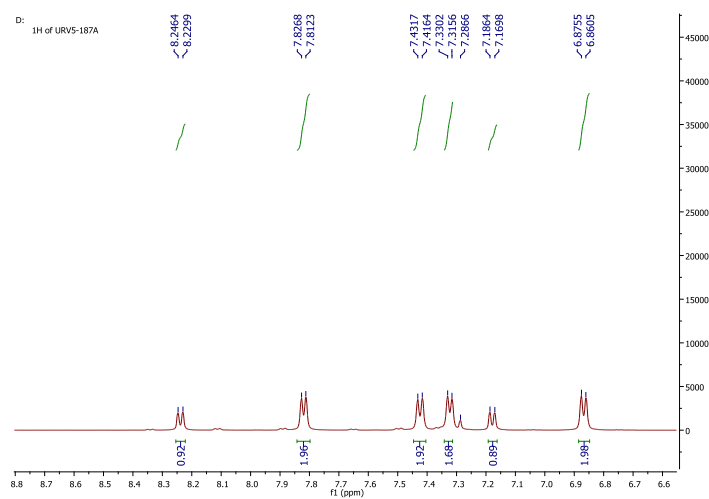

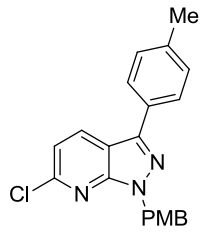

6-chloro-1-(4-methoxybenzyl)-3-(*p*-tolyl)-1*H*-pyrazolo[3,4-*b*]pyridine (**3v**)

D:  
13 C URV5-187A

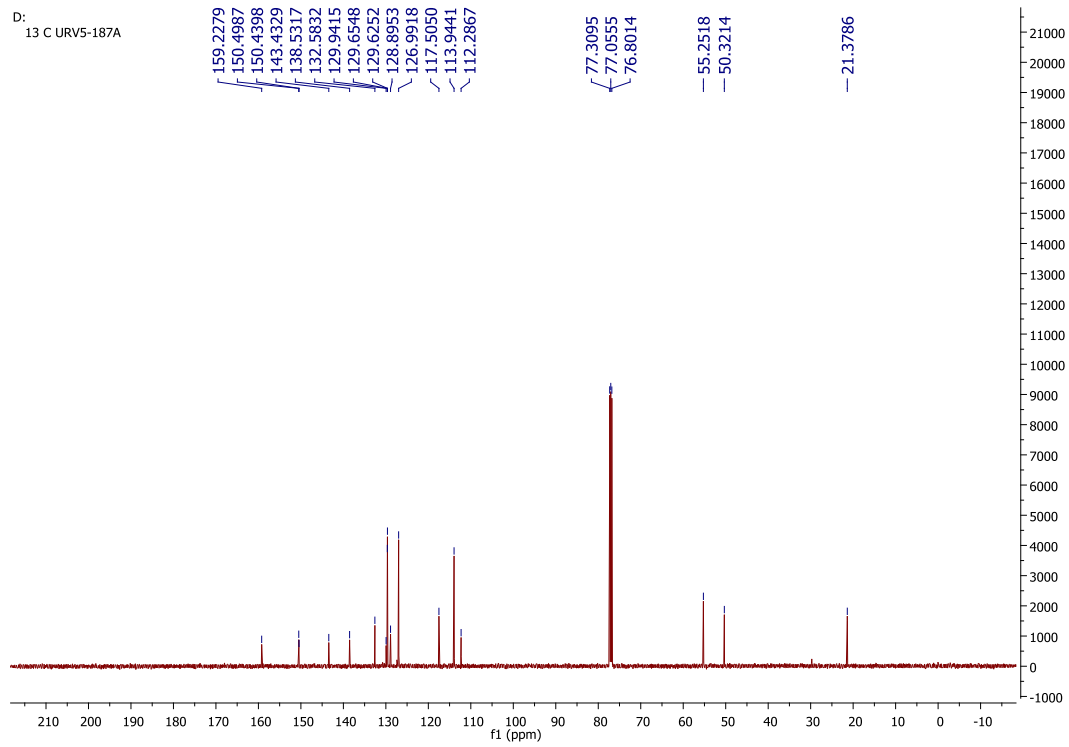

D:  
13 C URV5-187A

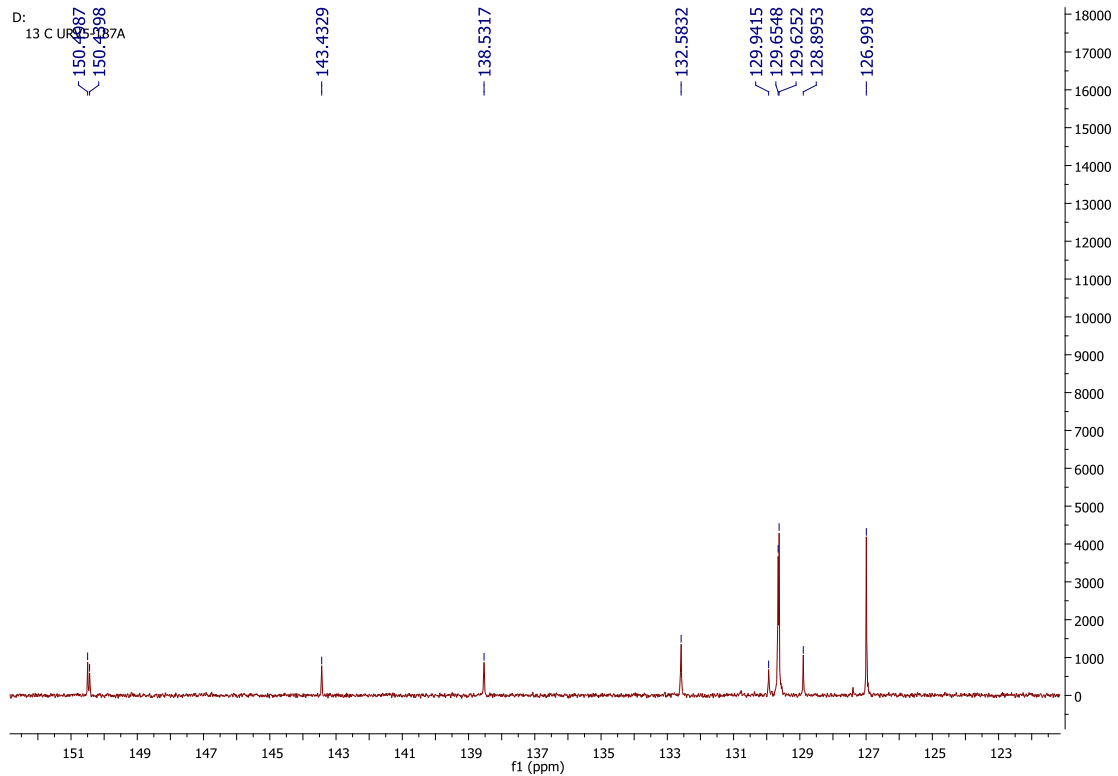

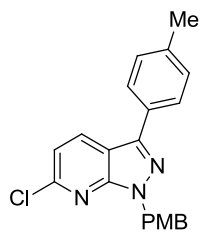

6-chloro-1-(4-methoxybenzyl)-3-(*p*-tolyl)-1*H*-pyrazolo[3,4-*b*]pyridine (**3v**)

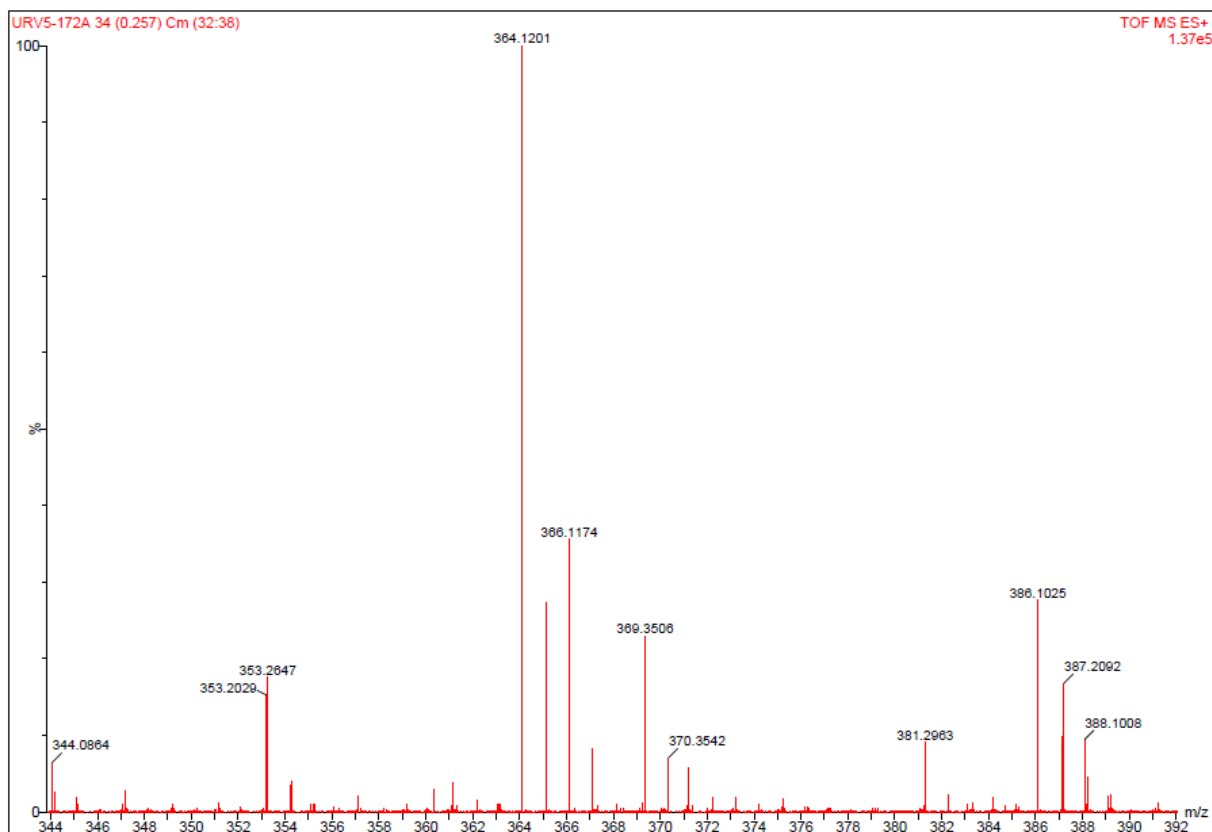

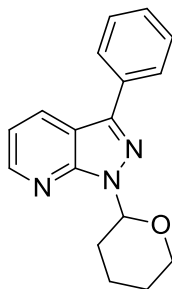

3-phenyl-1-(tetrahydro-2H-pyran-2-yl)-1H-pyrazolo[3,4-b]pyridine (**3w**)

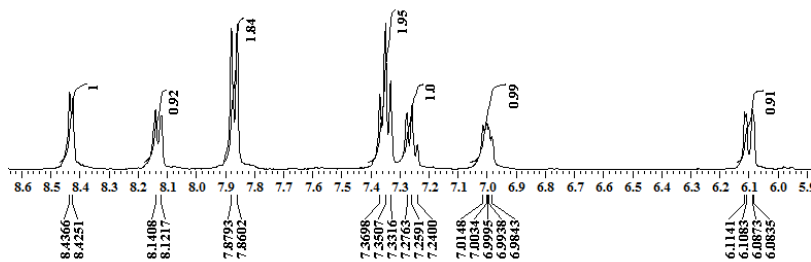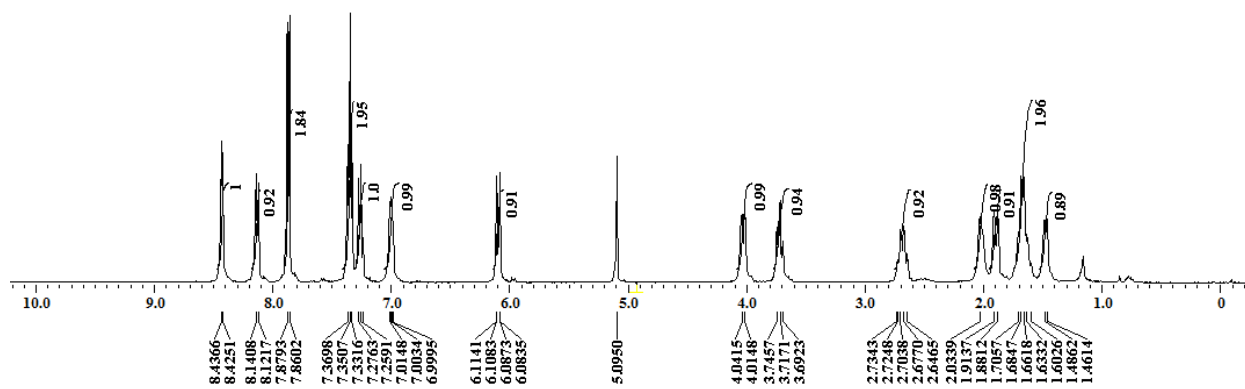



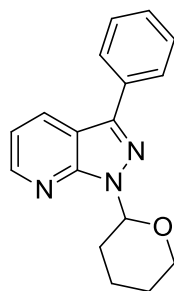

3-phenyl-1-(tetrahydro-2H-pyran-2-yl)-1H-pyrazolo[3,4-b]pyridine (**3w**)

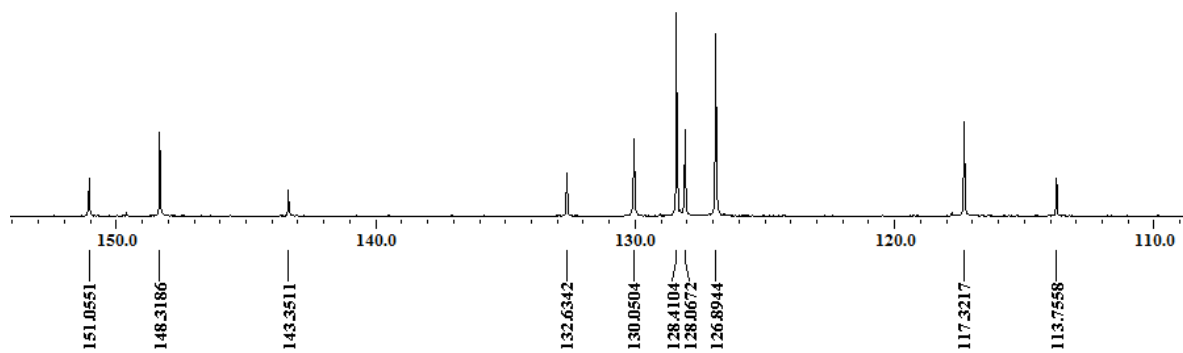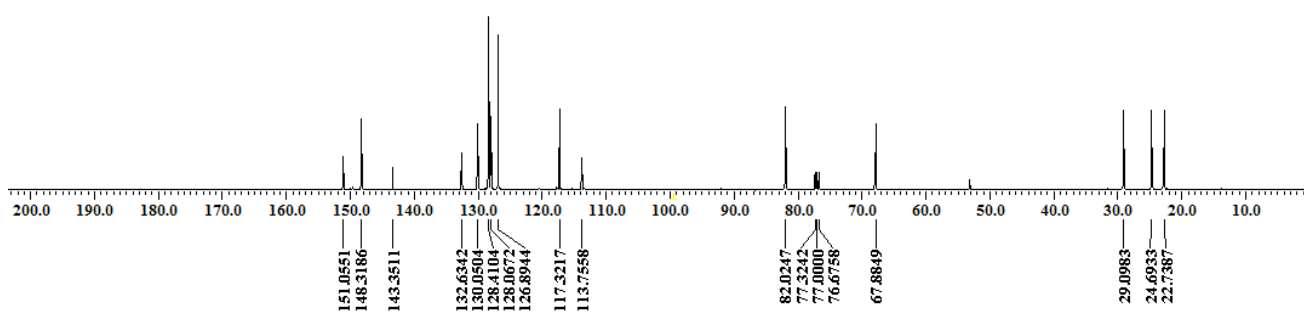



3-phenyl-1-(tetrahydro-2H-pyran-2-yl)-1H-pyrazolo[3,4-b]pyridine (**3w**)

### Qualitative Compound Report

Data File: URV5-61F.d  
 Sample Type: Sample  
 Instrument Name: Instrument 1  
 Acq Method: 29.10.2014.m  
 IRM Calibration Status: Success  
 Comment:

Sample Name: URV5-61F  
 Position: P1-F5  
 User Name:  
 Acquired Time: 02-05-2017 14:42:08  
 DA Method: Default.m

Sample Group: Info.  
 Acquisition SW: 6200 series TOF/6500 series  
 Version: Q-TOF B.05.01 (B5125)

#### Compound Table

| Compound Label      | RT | Mass     | Formula      | MFG Formula  | MFG Diff (ppm) | DB Formula   |
|---------------------|----|----------|--------------|--------------|----------------|--------------|
| Cpd 2: C17 H17 N3 O | 11 | 279.1369 | C17 H17 N3 O | C17 H17 N3 O | 0.9            | C17 H17 N3 O |

| Compound Label      | m/z      | RT | Algorithm                 | Mass     |
|---------------------|----------|----|---------------------------|----------|
| Cpd 2: C17 H17 N3 O | 280.1442 | 11 | Find by Molecular Feature | 279.1369 |

#### MFE MS Spectrum

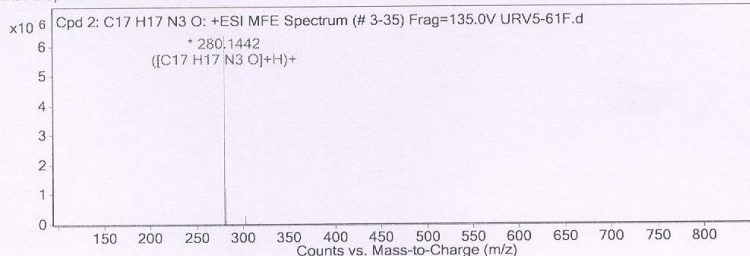

#### MFE MS Zoomed Spectrum

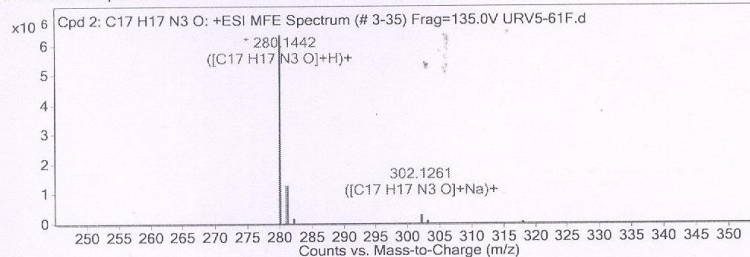

#### MS Spectrum Peak List

| m/z      | z | Abund      | Formula      | Ion     |
|----------|---|------------|--------------|---------|
| 280.1442 | 1 | 6344692.5  | C17 H17 N3 O | (M+H)+  |
| 281.1476 | 1 | 1251173.85 | C17 H17 N3 O | (M+H)+  |
| 282.1502 | 1 | 126032.01  | C17 H17 N3 O | (M+H)+  |
| 283.1536 | 1 | 8815.85    | C17 H17 N3 O | (M+H)+  |
| 302.1261 | 1 | 269895.91  | C17 H17 N3 O | (M+Na)+ |
| 303.1293 | 1 | 52023.5    | C17 H17 N3 O | (M+Na)+ |
| 304.1318 | 1 | 5678.95    | C17 H17 N3 O | (M+Na)+ |
| 318.1001 | 1 | 37866.95   | C17 H17 N3 O | (M+K)+  |
| 319.1042 | 1 | 7731.97    | C17 H17 N3 O | (M+K)+  |
| 320.1009 | 1 | 3597.92    | C17 H17 N3 O | (M+K)+  |

--- End Of Report ---

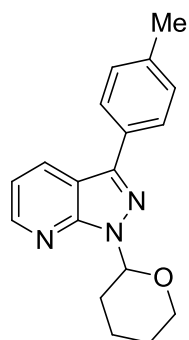

1-(tetrahydro-2H-pyran-2-yl)-3-(*p*-tolyl)-1H-pyrazolo[3,4-*b*]pyridine (**3x**)

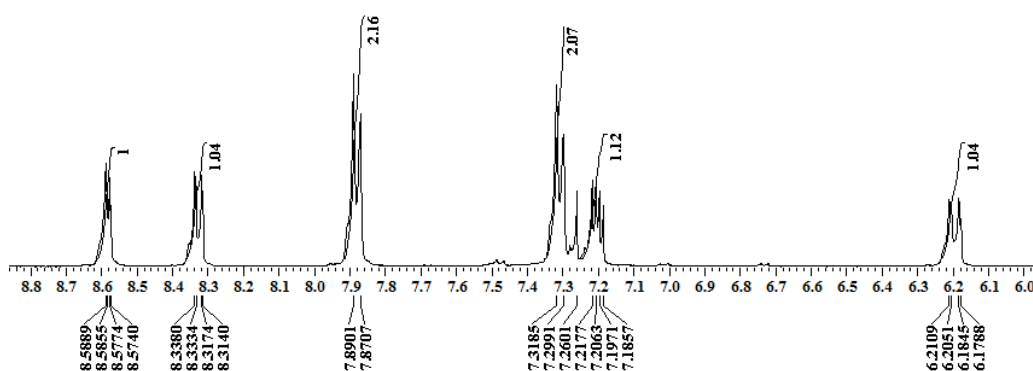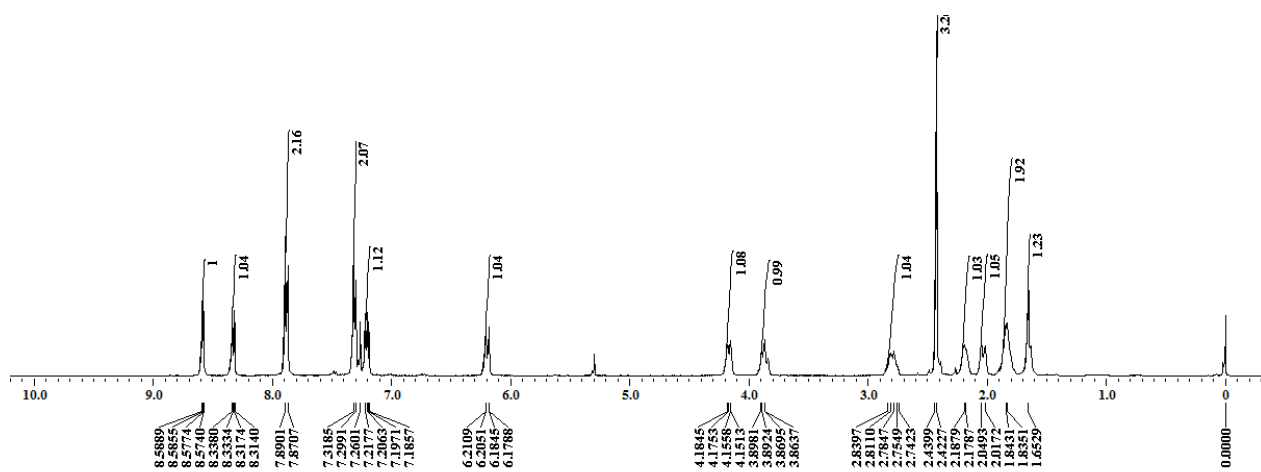

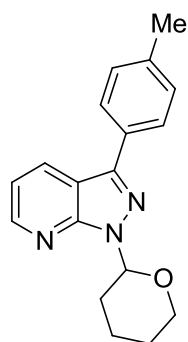

1-(tetrahydro-2H-pyran-2-yl)-3-(*p*-tolyl)-1H-pyrazolo[3,4-*b*]pyridine (**3x**)

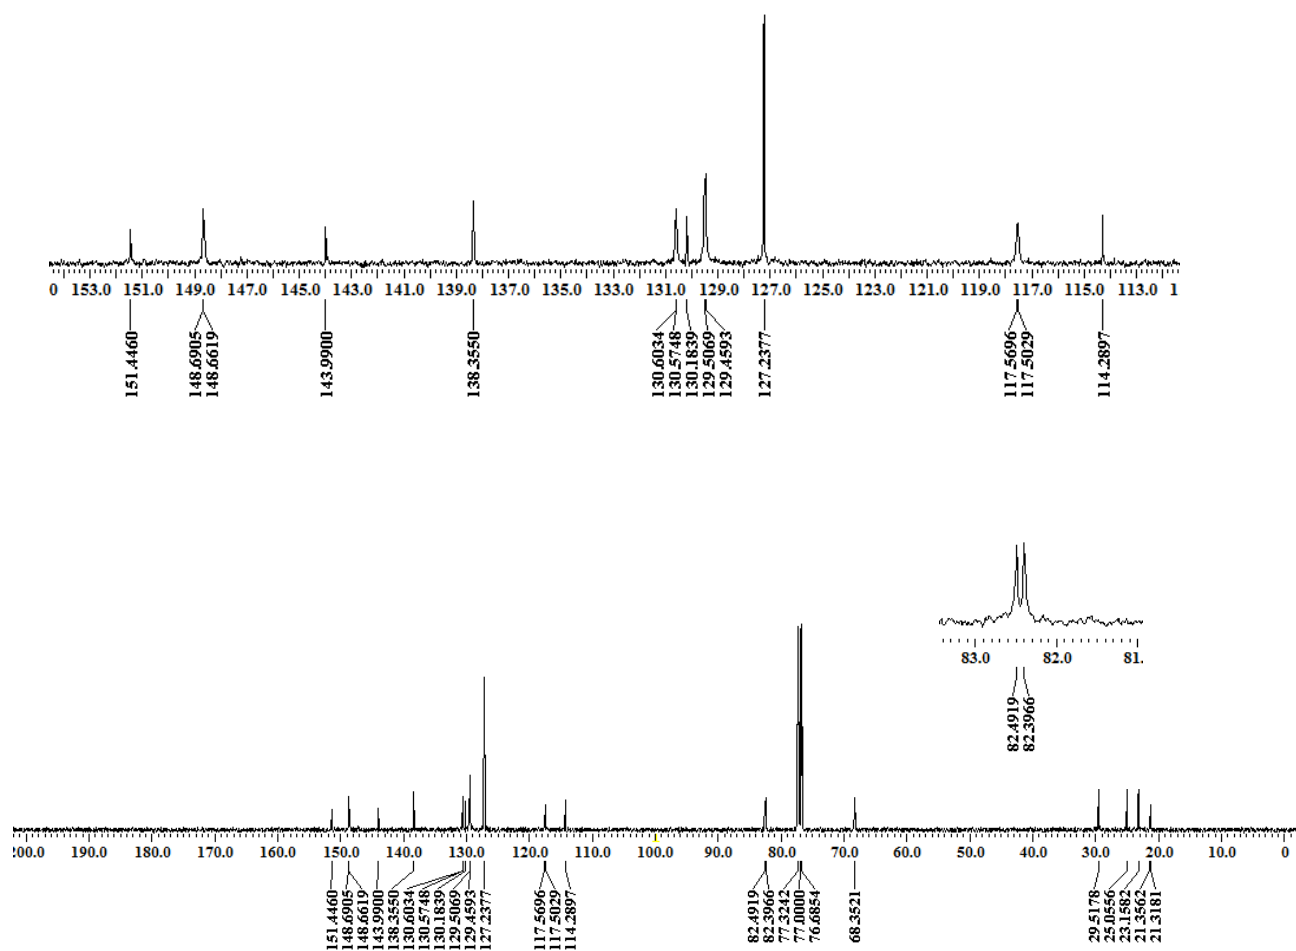

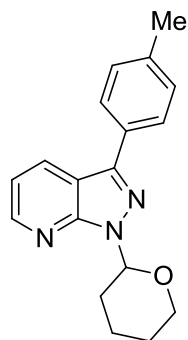

1-(tetrahydro-2H-pyran-2-yl)-3-(p-tolyl)-1H-pyrazolo[3,4-b]pyridine (3x)

## Qualitative Compound Report

|                        |              |               |                     |
|------------------------|--------------|---------------|---------------------|
| Data File              | URV5-80F.d   | Sample Name   | URV5-80F            |
| Sample Type            | Sample       | Position      | P1-C4               |
| Instrument Name        | Instrument 1 | User Name     |                     |
| Acq Method             | 29.10.2014.m | Acquired Time | 03-05-2017 13:52:42 |
| IRM Calibration Status | Success      | DA Method     | Default.m           |
| Comment                |              |               |                     |

|                |                             |       |
|----------------|-----------------------------|-------|
| Sample Group   |                             | Info. |
| Acquisition SW | 6200 series TOF/6500 series |       |
| Version        | Q-TOF B.05.01 (B5125)       |       |

### Compound Table

| Compound Label      | RT | Mass     | Formula      | MFG Formula  | MFG Diff (ppm) | DB Formula   |
|---------------------|----|----------|--------------|--------------|----------------|--------------|
| Cpd 2: C18 H19 N3 O | 11 | 293.1533 | C18 H19 N3 O | C18 H19 N3 O | -1.61          | C18 H19 N3 O |

| Compound Label      | m/z      | RT | Algorithm                 | Mass     |
|---------------------|----------|----|---------------------------|----------|
| Cpd 2: C18 H19 N3 O | 294.1605 | 11 | Find by Molecular Feature | 293.1533 |

### MFE MS Spectrum

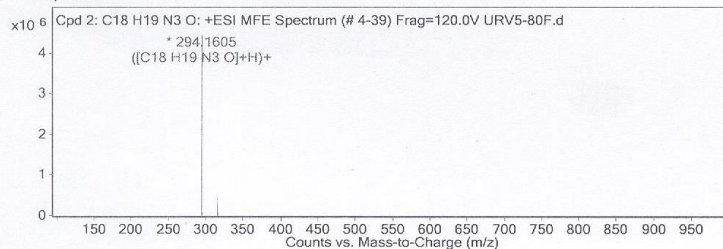

### MFE MS Zoomed Spectrum

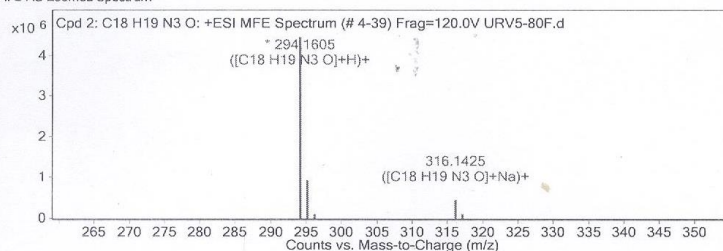

### MS Spectrum Peak List

| m/z      | z | Abund     | Formula      | Ion     |
|----------|---|-----------|--------------|---------|
| 294.1605 | 1 | 4459341   | C18 H19 N3 O | (M+H)+  |
| 295.1638 | 1 | 928137.47 | C18 H19 N3 O | (M+H)+  |
| 296.1665 | 1 | 95351.72  | C18 H19 N3 O | (M+H)+  |
| 297.1691 | 1 | 7475.5    | C18 H19 N3 O | (M+H)+  |
| 298.1651 | 1 | 613.77    | C18 H19 N3 O | (M+H)+  |
| 316.1425 | 1 | 437508.53 | C18 H19 N3 O | (M+Na)+ |
| 317.1454 | 1 | 89284.05  | C18 H19 N3 O | (M+Na)+ |
| 318.1481 | 1 | 9720.9    | C18 H19 N3 O | (M+Na)+ |
| 319.1619 | 1 | 2338.55   | C18 H19 N3 O | (M+Na)+ |
| 320.1748 | 1 | 184.26    | C18 H19 N3 O | (M+Na)+ |

--- End Of Report ---

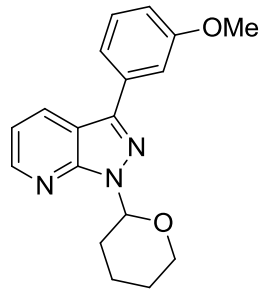

3-(3-methoxyphenyl)-1-(tetrahydro-2H-pyran-2-yl)-1H-pyrazolo[3,4-b]pyridine (**3y**)

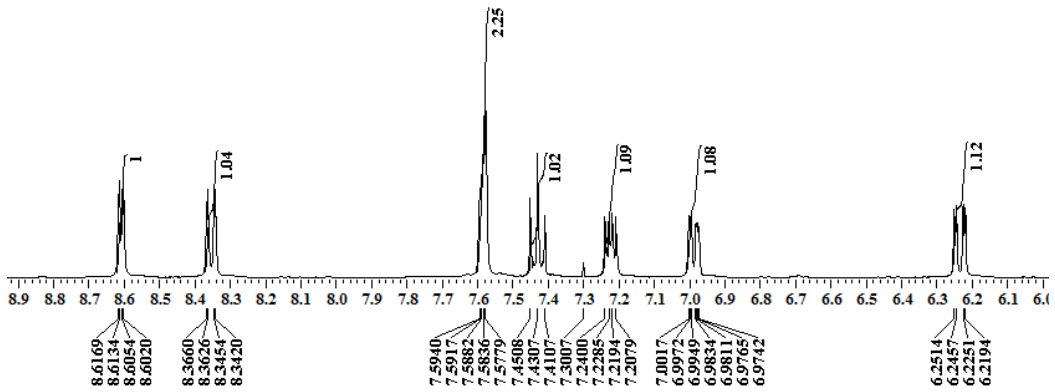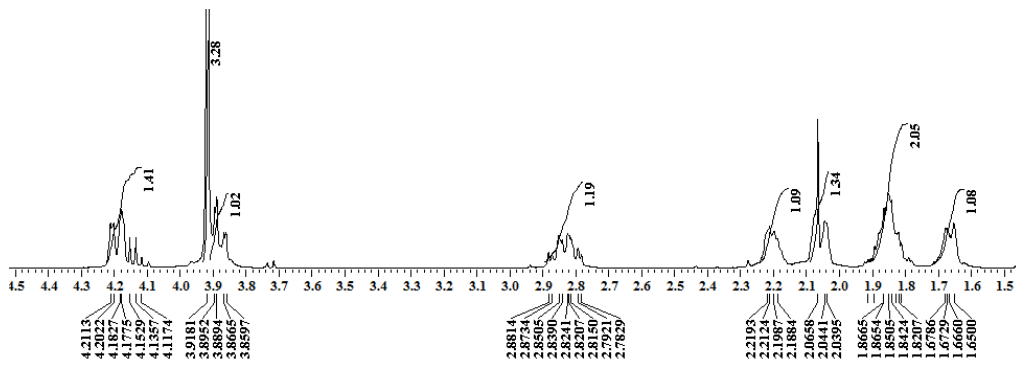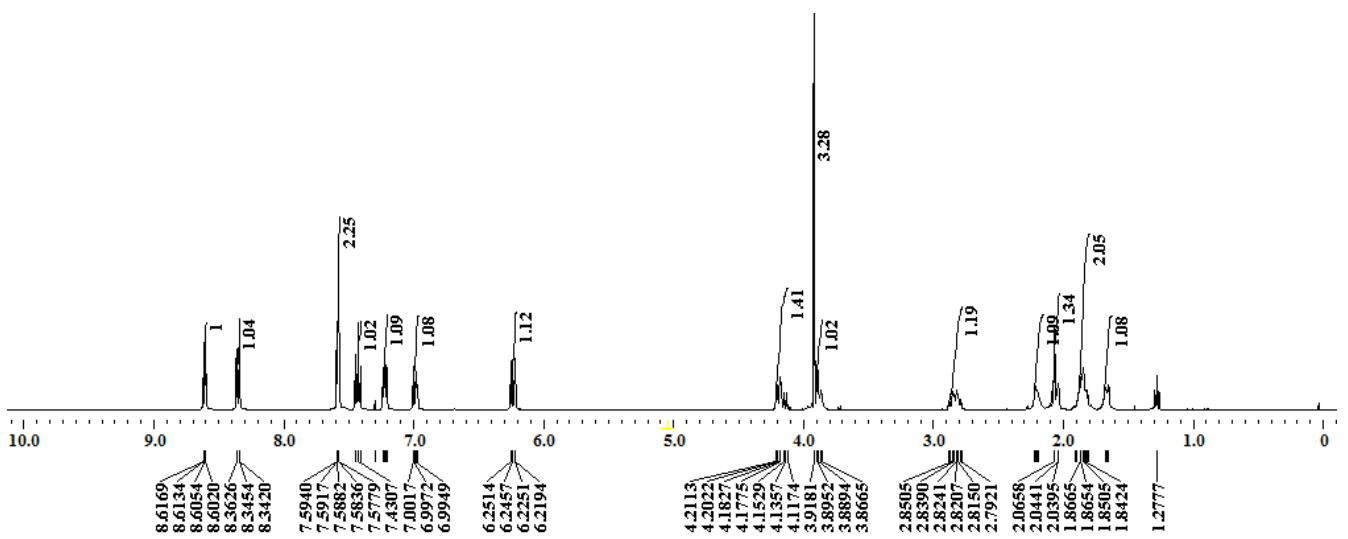

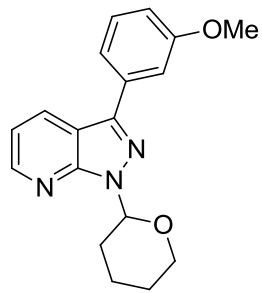

3-(3-methoxyphenyl)-1-(tetrahydro-2H-pyran-2-yl)-1H-pyrazolo[3,4-b]pyridine (**3y**)

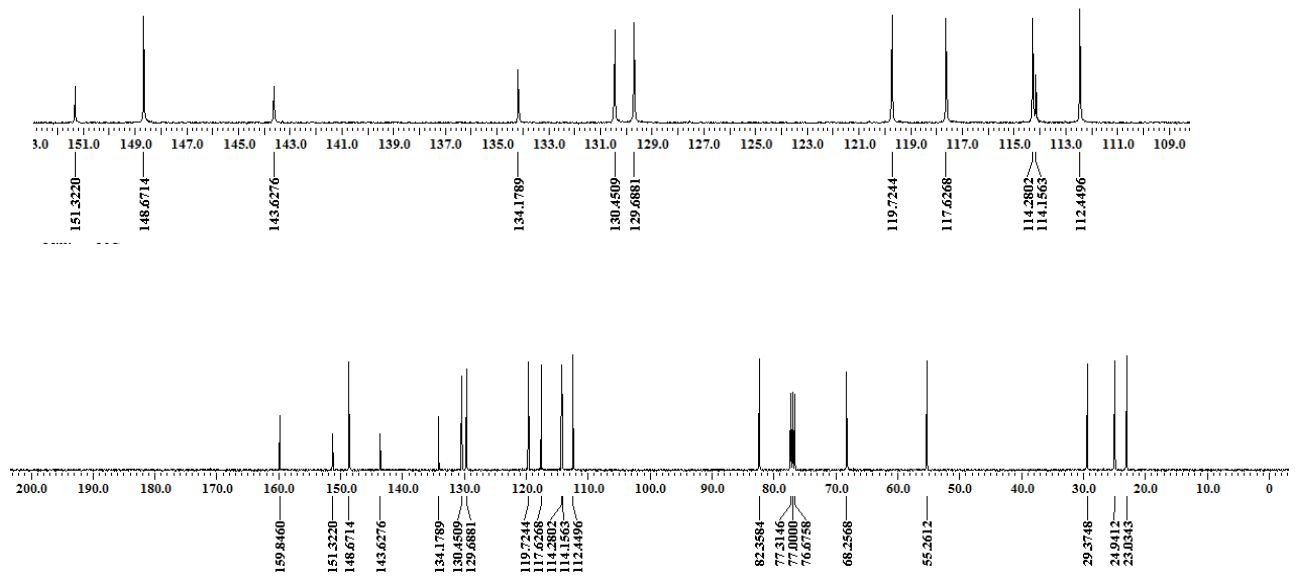

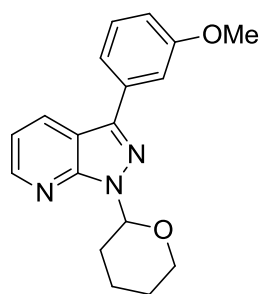

3-(3-methoxyphenyl)-1-(tetrahydro-2H-pyran-2-yl)-1H-pyrazolo[3,4-b]pyridine (**3y**)

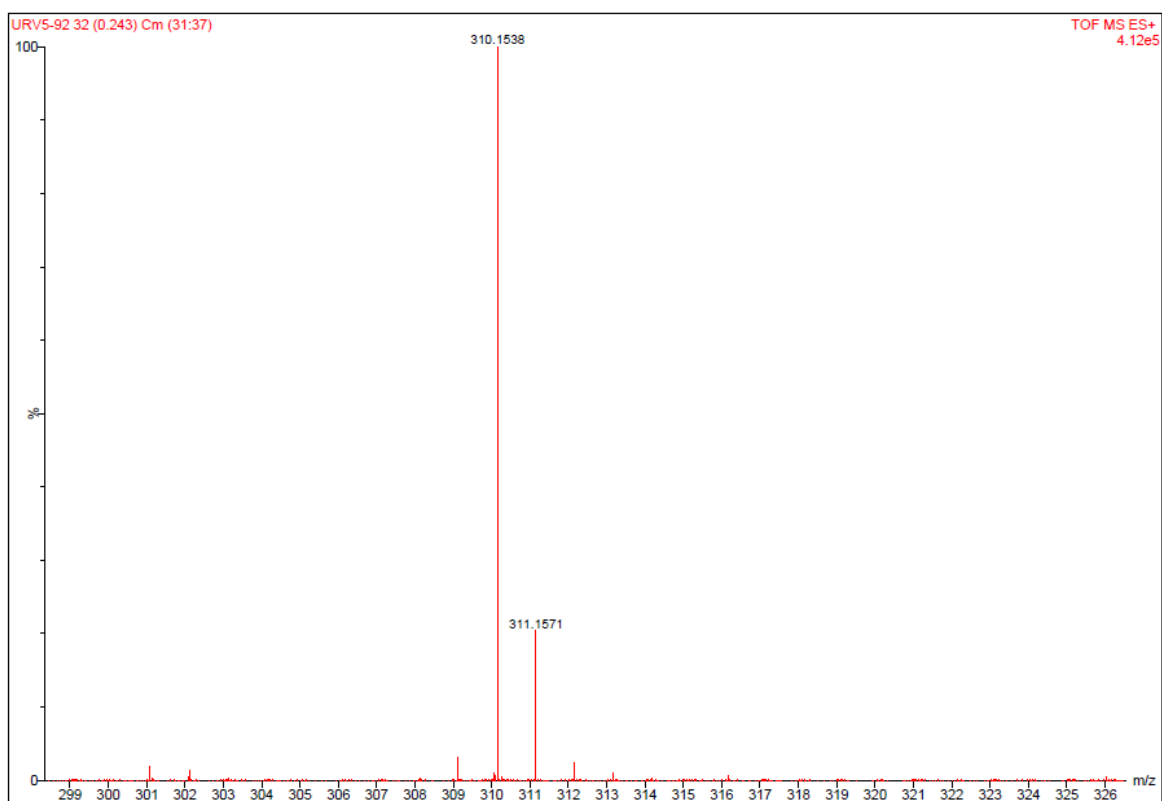



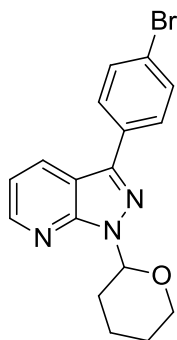

3-(4-bromophenyl)-1-(tetrahydro-2H-pyran-2-yl)-1H-pyrazolo[3,4-b]pyridine (**3z**)

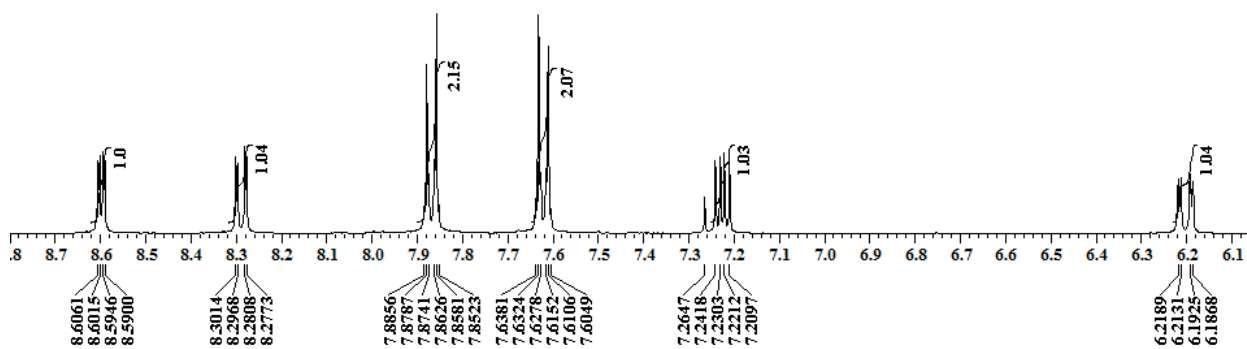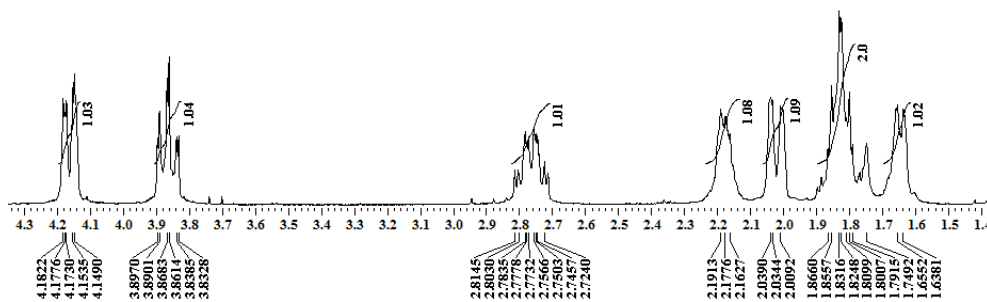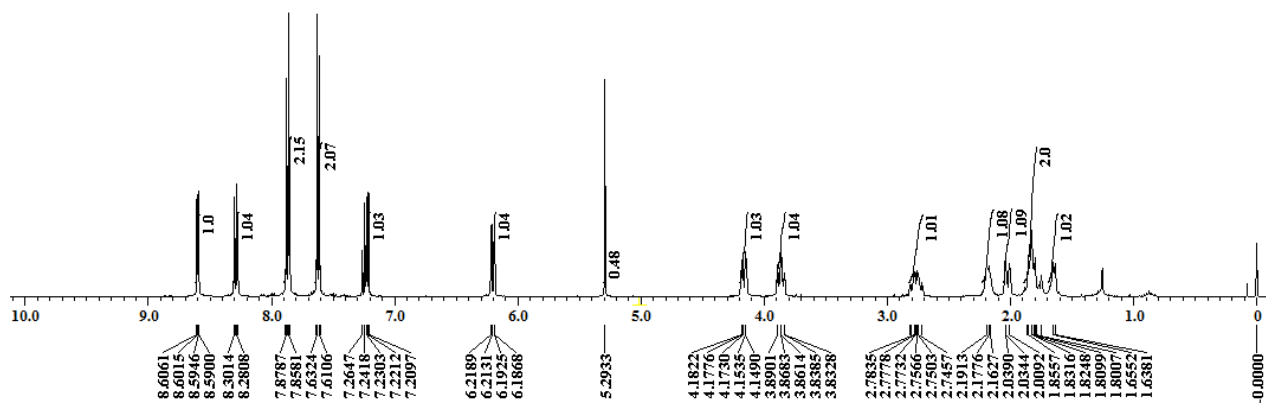

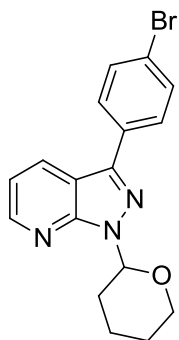

3-(4-bromophenyl)-1-(tetrahydro-2H-pyran-2-yl)-1H-pyrazolo[3,4-b]pyridine (**3z**)

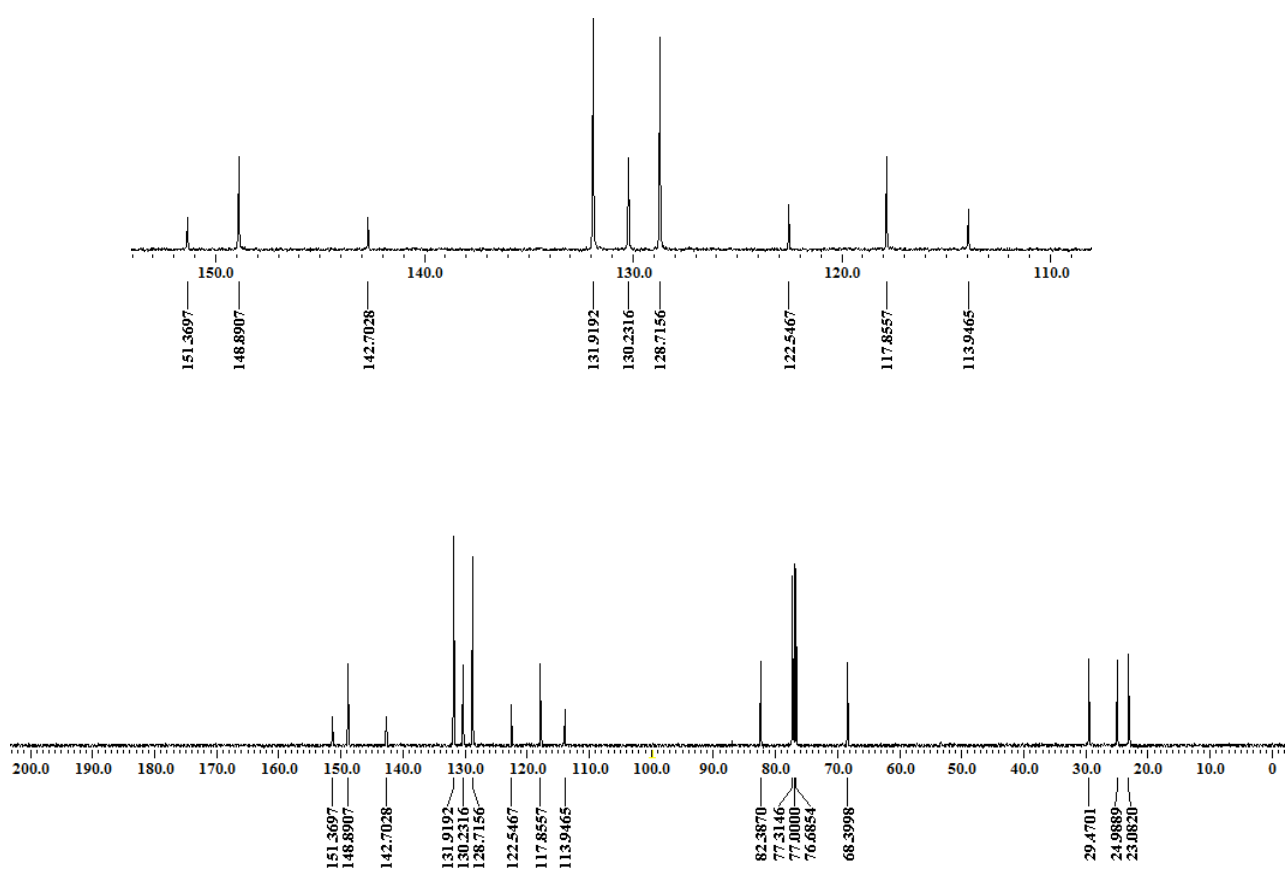

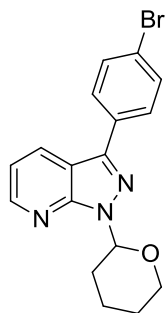

3-(4-bromophenyl)-1-(tetrahydro-2H-pyran-2-yl)-1H-pyrazolo[3,4-b]pyridine (3z)

## Qualitative Compound Report

|                               |              |                      |                     |
|-------------------------------|--------------|----------------------|---------------------|
| <b>Data File</b>              | URV5-79.d    | <b>Sample Name</b>   | URV5-79             |
| <b>Sample Type</b>            | Sample       | <b>Position</b>      | P1-C5               |
| <b>Instrument Name</b>        | Instrument 1 | <b>User Name</b>     |                     |
| <b>Acq Method</b>             | 29.10.2014.m | <b>Acquired Time</b> | 04-05-2017 13:36:30 |
| <b>IRM Calibration Status</b> | Success      | <b>DA Method</b>     | Default.m           |
| <b>Comment</b>                |              |                      |                     |

|                       |                             |              |
|-----------------------|-----------------------------|--------------|
| <b>Sample Group</b>   |                             | <b>Info.</b> |
| <b>Acquisition SW</b> | 6200 series TOF/6500 series |              |
| <b>Version</b>        | Q-TOF B.05.01 (B5125)       |              |

### Compound Table

| Compound Label         | RT | Mass     | Formula         | MFG Formula     | MFG Diff (ppm) | DB Formula      |
|------------------------|----|----------|-----------------|-----------------|----------------|-----------------|
| Cpd 3: C17 H16 Br N3 O | 10 | 357.0474 | C17 H16 Br N3 O | C17 H16 Br N3 O | 0.71           | C17 H16 Br N3 O |

| Compound Label         | m/z      | RT | Algorithm                 | Mass     |
|------------------------|----------|----|---------------------------|----------|
| Cpd 3: C17 H16 Br N3 O | 358.0547 | 10 | Find by Molecular Feature | 357.0474 |

### MFE MS Spectrum

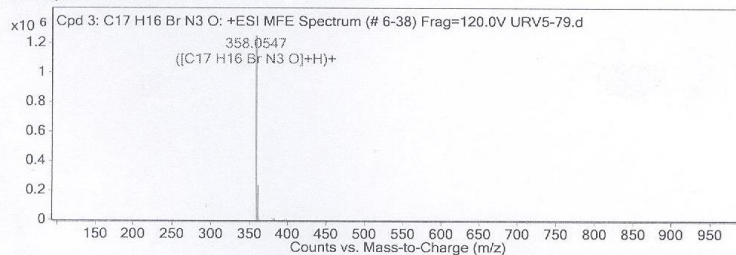

### MFE MS Zoomed Spectrum

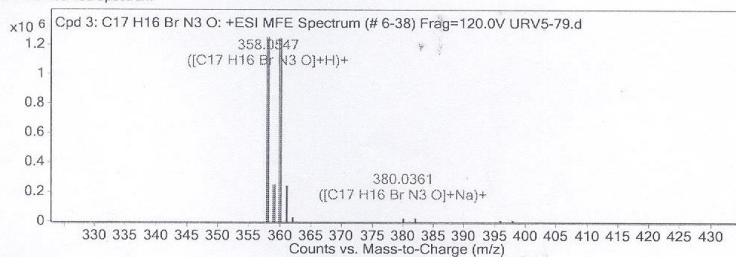

### MS Spectrum Peak List

| m/z      | z | Abund      | Formula         | Ion     |
|----------|---|------------|-----------------|---------|
| 358.0547 | 1 | 1249394.75 | C17 H16 Br N3 O | (M+H)+  |
| 359.0575 | 1 | 237703.25  | C17 H16 Br N3 O | (M+H)+  |
| 360.0529 | 1 | 1249030.34 | C17 H16 Br N3 O | (M+H)+  |
| 361.0555 | 1 | 238231.74  | C17 H16 Br N3 O | (M+H)+  |
| 362.0582 | 1 | 24301.57   | C17 H16 Br N3 O | (M+H)+  |
| 380.0361 | 1 | 16483.84   | C17 H16 Br N3 O | (M+Na)+ |
| 381.0385 | 1 | 3412.34    | C17 H16 Br N3 O | (M+Na)+ |
| 382.0344 | 1 | 15942.2    | C17 H16 Br N3 O | (M+Na)+ |
| 396.0096 | 1 | 5955.04    | C17 H16 Br N3 O | (M+K)+  |
| 398.009  | 1 | 6378.76    | C17 H16 Br N3 O | (M+K)+  |

--- End Of Report ---

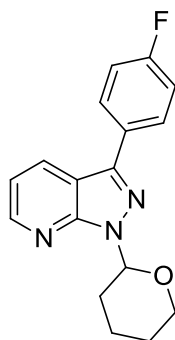

3-(4-fluorophenyl)-1-(tetrahydro-2H-pyran-2-yl)-1H-pyrazolo[3,4-b]pyridine (**3aa**)

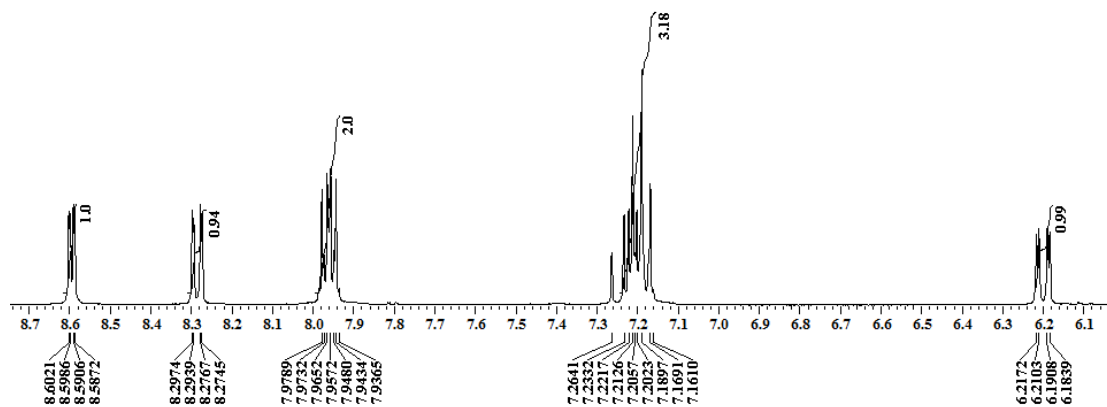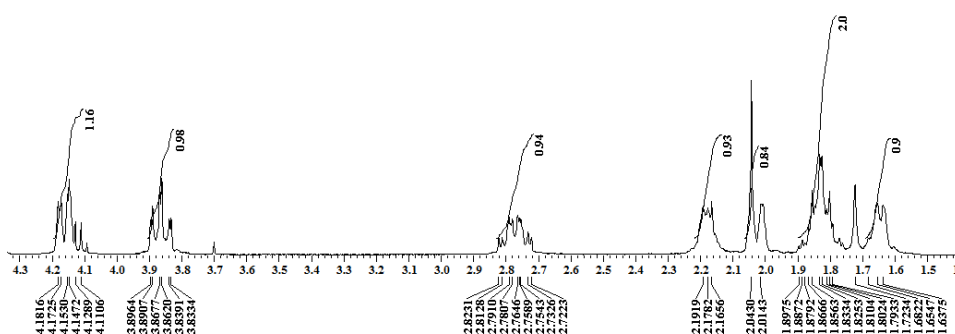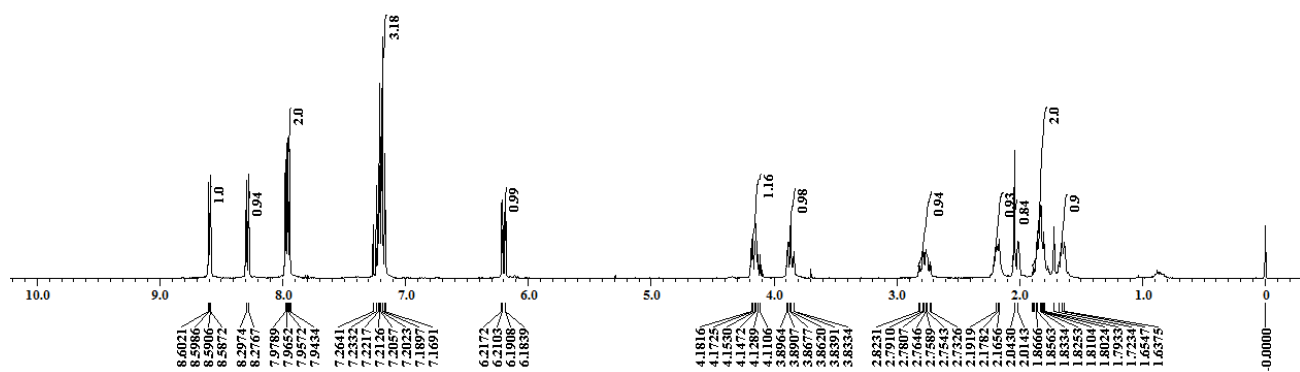



3-(4-fluorophenyl)-1-(tetrahydro-2H-pyran-2-yl)-1H-pyrazolo[3,4-b]pyridine (**3aa**)

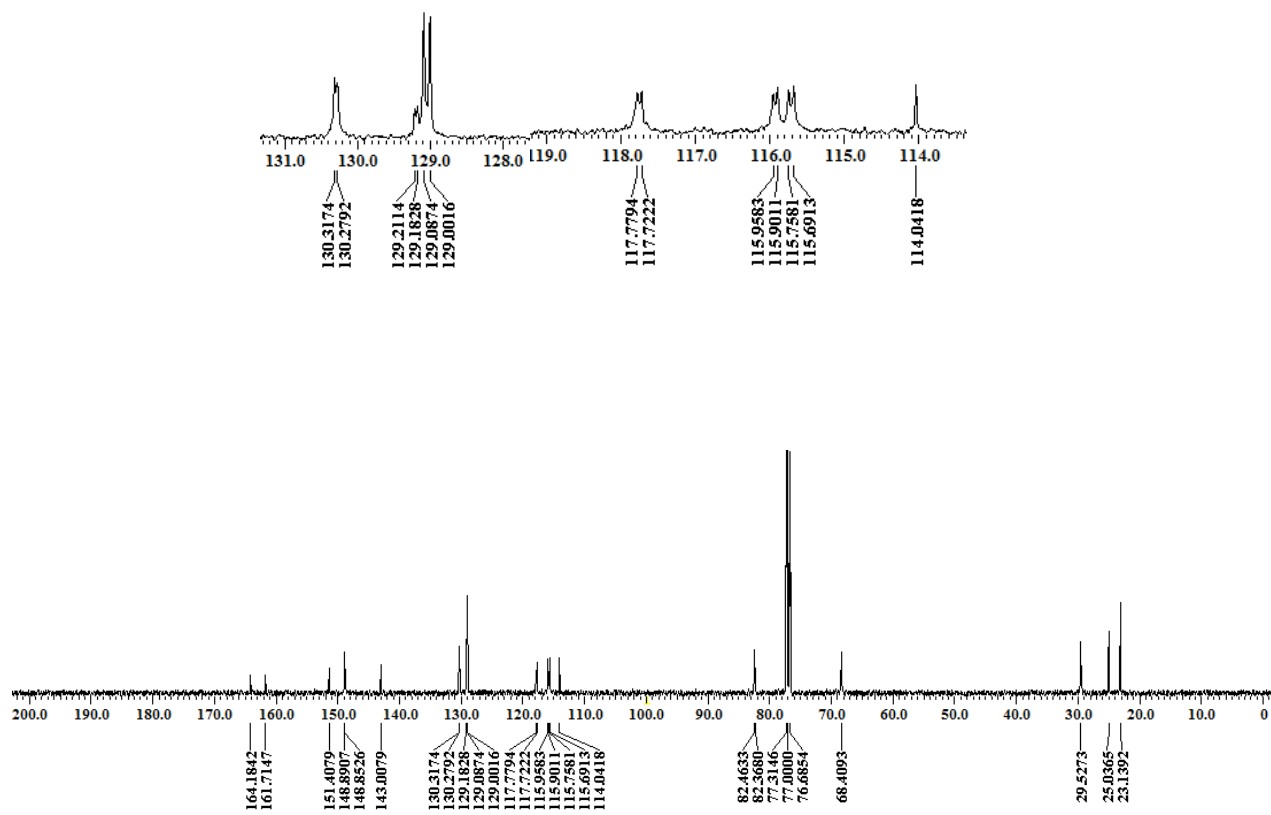

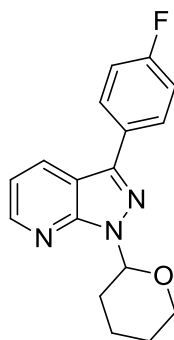

3-(4-fluorophenyl)-1-(tetrahydro-2H-pyran-2-yl)-1H-pyrazolo[3,4-b]pyridine (3aa)

### Qualitative Compound Report

Data File: URV5-98.d  
 Sample Type: Sample  
 Instrument Name: Instrument 1  
 Acq Method: 29.10.2014.m  
 IRM Calibration Status: Success  
 Comment:

Sample Name: URV5-98  
 Position: P1-F6  
 User Name:  
 Acquired Time: 18-05-2017 13:44:38  
 DA Method: Default.m

Sample Group: Info.  
 Acquisition SW: 6200 series TOF/6500 series  
 Version: Q-TOF B.05.01 (B5125)

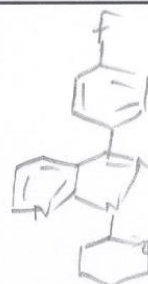

#### Compound Table

| Compound Label        | RT | Mass     | Formula        | MFG Formula    | MFG Diff (ppm) | DB Formula     |
|-----------------------|----|----------|----------------|----------------|----------------|----------------|
| Cpd 2: C17 H16 F N3 O | 10 | 297.1276 | C17 H16 F N3 O | C17 H16 F N3 O | 0.5            | C17 H16 F N3 O |

| Compound Label        | m/z      | RT | Algorithm                 | Mass     |
|-----------------------|----------|----|---------------------------|----------|
| Cpd 2: C17 H16 F N3 O | 298.1349 | 10 | Find by Molecular Feature | 297.1276 |

#### MFE MS Spectrum

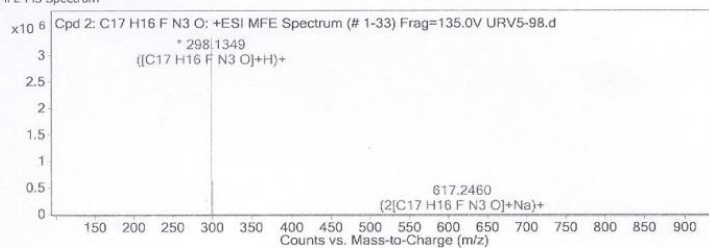

#### MFE MS Zoomed Spectrum

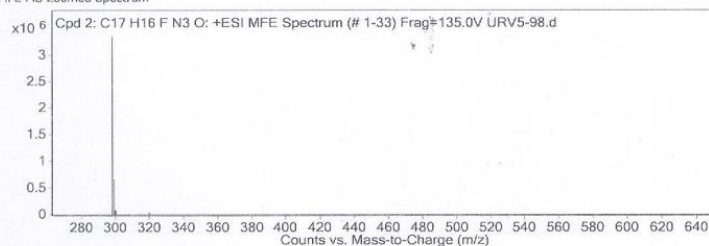

#### MS Spectrum Peak List

| m/z      | z | Abund     | Formula        | Ion     |
|----------|---|-----------|----------------|---------|
| 298.1349 | 1 | 3336459   | C17 H16 F N3 O | (M+H)+  |
| 299.138  | 1 | 641066.42 | C17 H16 F N3 O | (M+H)+  |
| 300.1406 | 1 | 65379.57  | C17 H16 F N3 O | (M+H)+  |
| 301.1433 | 1 | 8028.83   | C17 H16 F N3 O | (M+H)+  |
| 320.1163 | 1 | 26685.55  | C17 H16 F N3 O | (M+Na)+ |
| 321.1197 | 1 | 5501.2    | C17 H16 F N3 O | (M+Na)+ |
| 322.1272 | 1 | 756.22    | C17 H16 F N3 O | (M+Na)+ |
| 336.0911 | 1 | 5170.53   | C17 H16 F N3 O | (M+K)+  |
| 337.0946 | 1 | 1157.52   | C17 H16 F N3 O | (M+K)+  |
| 338.0907 | 1 | 579.47    | C17 H16 F N3 O | (M+K)+  |

--- End Of Report ---

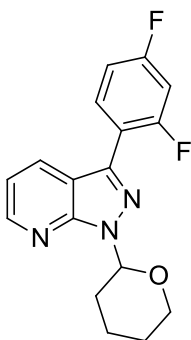

3-(2,4-difluorophenyl)-1-(tetrahydro-2H-pyran-2-yl)-1H-pyrazolo[3,4-b]pyridine (**3ab**)

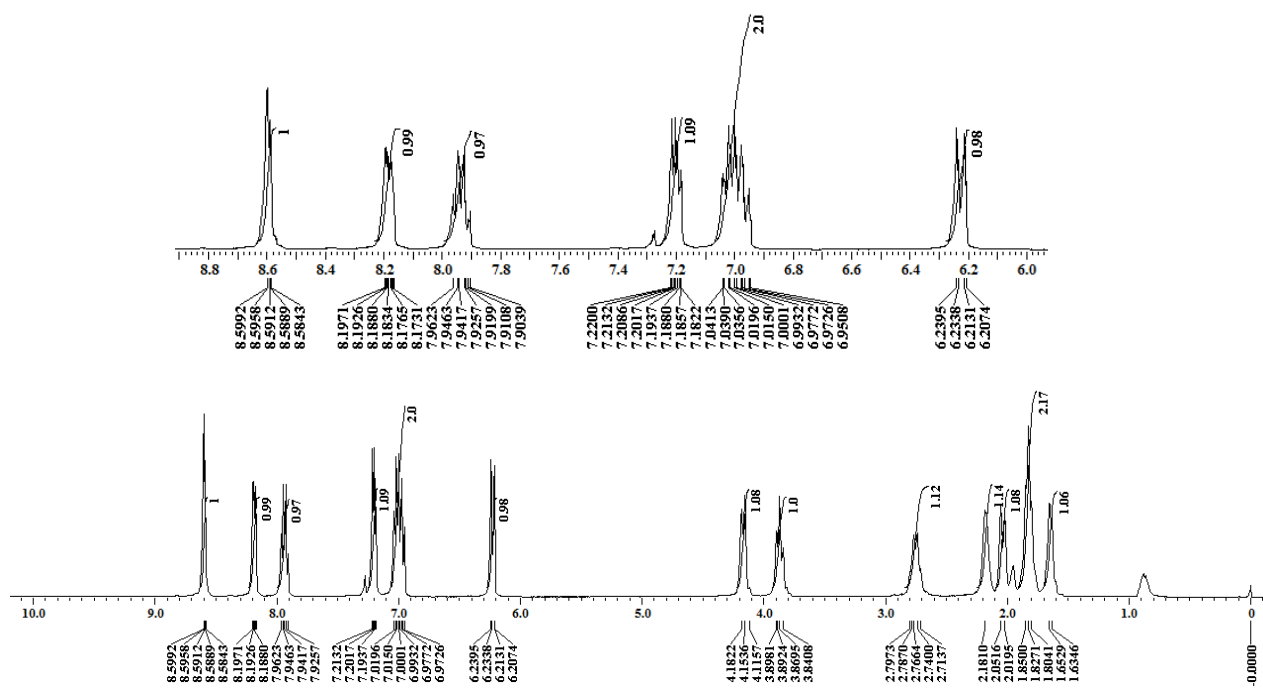

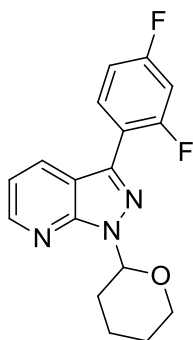

3-(2,4-difluorophenyl)-1-(tetrahydro-2H-pyran-2-yl)-1H-pyrazolo[3,4-b]pyridine (**3ab**)

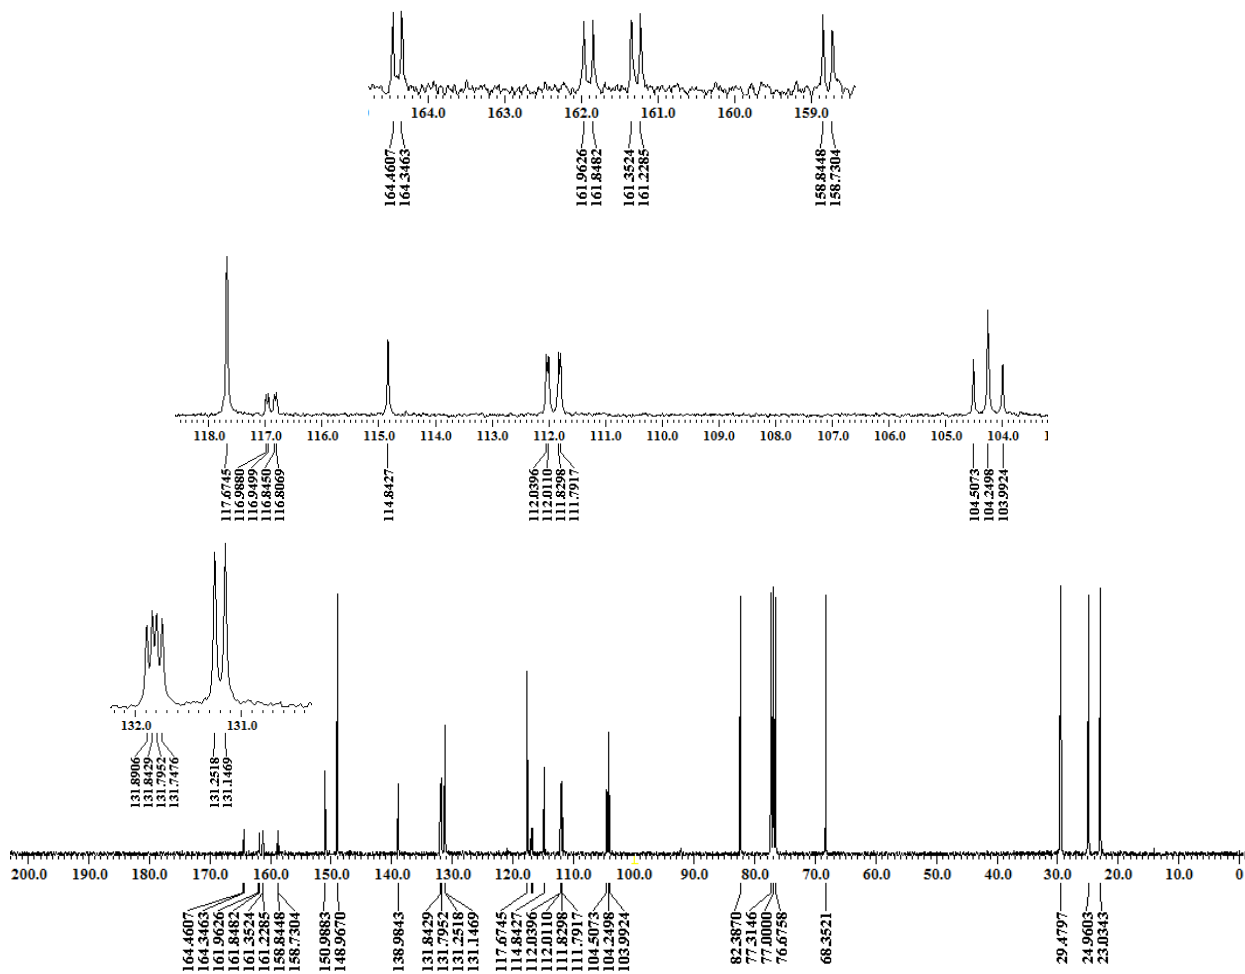



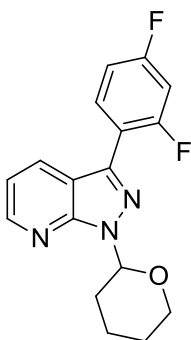

3-(2,4-difluorophenyl)-1-(tetrahydro-2H-pyran-2-yl)-1H-pyrazolo[3,4-b]pyridine (**3ab**)

### Qualitative Compound Report

|                        |              |               |                     |
|------------------------|--------------|---------------|---------------------|
| Data File              | URV5-91.d    | Sample Name   | URV5-91             |
| Sample Type            | Sample       | Position      | P1-D8               |
| Instrument Name        | Instrument 1 | User Name     |                     |
| Acq Method             | 29.10.2014.m | Acquired Time | 16-05-2017 13:29:11 |
| IRM Calibration Status | Success      | DA Method     | Default.m           |
| Comment                |              |               |                     |

Sample Group: Info.  
 Acquisition SW: 6200 series TOF/6500 series  
 Version: Q-TOF B.05.01 (B5125)

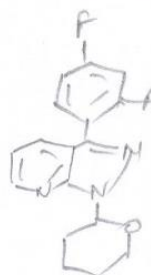

#### Compound Table

| Compound Label         | RT | Mass     | Formula         | MFG Formula     | MFG Diff (ppm) | DB Formula      |
|------------------------|----|----------|-----------------|-----------------|----------------|-----------------|
| Cpd 2: C17 H15 F2 N3 O | 10 | 315.1186 | C17 H15 F2 N3 O | C17 H15 F2 N3 O | -0.98          | C17 H15 F2 N3 O |

| Compound Label         | m/z      | RT | Algorithm                 | Mass     |
|------------------------|----------|----|---------------------------|----------|
| Cpd 2: C17 H15 F2 N3 O | 316.1259 | 10 | Find by Molecular Feature | 315.1186 |

#### MFE MS Spectrum

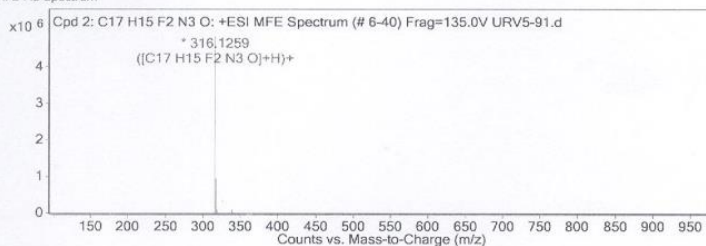

#### MFE MS Zoomed Spectrum

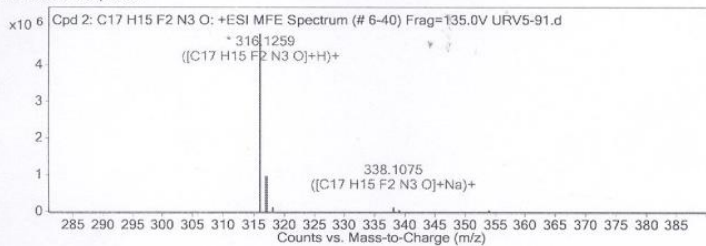

#### MS Spectrum Peak List

| m/z      | z | Abund     | Formula         | Ion     |
|----------|---|-----------|-----------------|---------|
| 316.1259 | 1 | 4863810.5 | C17 H15 F2 N3 O | (M+H)+  |
| 317.1292 | 1 | 953143.87 | C17 H15 F2 N3 O | (M+H)+  |
| 318.1316 | 1 | 98928.36  | C17 H15 F2 N3 O | (M+H)+  |
| 319.1351 | 1 | 6556.25   | C17 H15 F2 N3 O | (M+H)+  |
| 320.1357 | 1 | 650.77    | C17 H15 F2 N3 O | (M+H)+  |
| 338.1075 | 1 | 95669.2   | C17 H15 F2 N3 O | (M+Na)+ |
| 339.1105 | 1 | 18298.4   | C17 H15 F2 N3 O | (M+Na)+ |
| 354.0817 | 1 | 19328.12  | C17 H15 F2 N3 O | (M+K)+  |
| 355.0825 | 1 | 4451.46   | C17 H15 F2 N3 O | (M+K)+  |
| 356.0837 | 1 | 2037.3    | C17 H15 F2 N3 O | (M+K)+  |

--- End Of Report ---

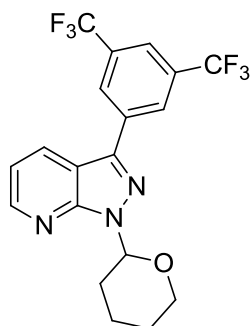

3-(3,5-bis(trifluoromethyl)phenyl)-1-(tetrahydro-2H-pyran-2-yl)-1H-pyrazolo[3,4-b]pyridine (**3ac**)

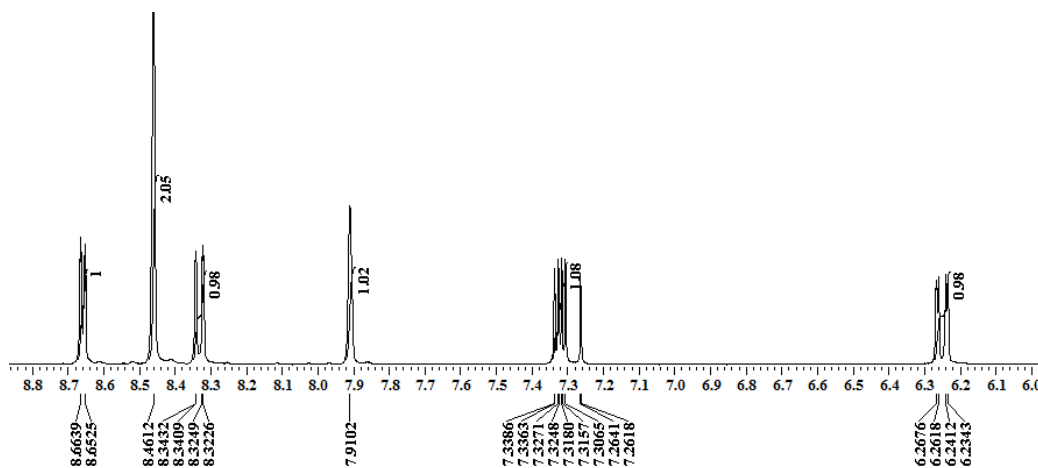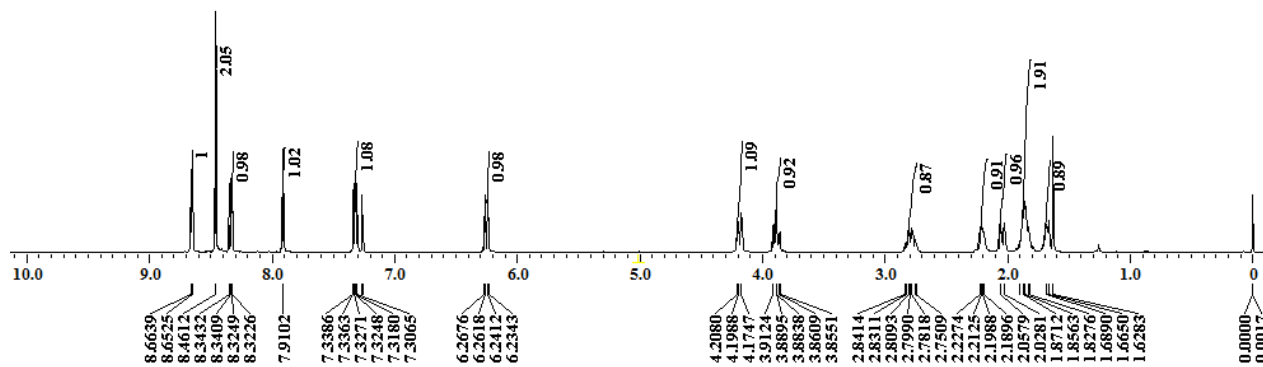

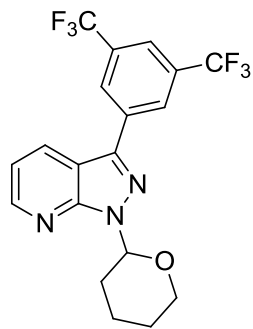

3-(3,5-bis(trifluoromethyl)phenyl)-1-(tetrahydro-2H-pyran-2-yl)-1H-pyrazolo[3,4-b]pyridine (**3ac**)

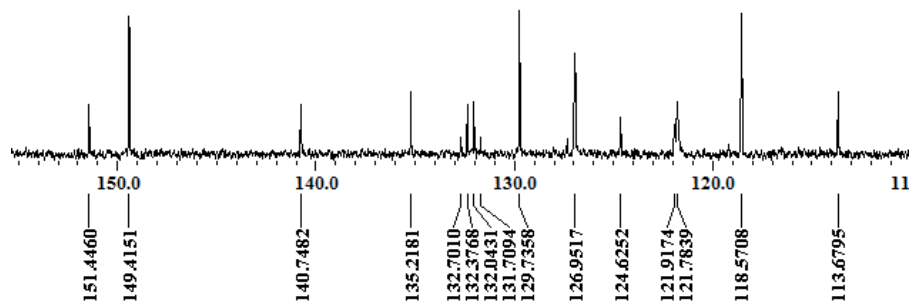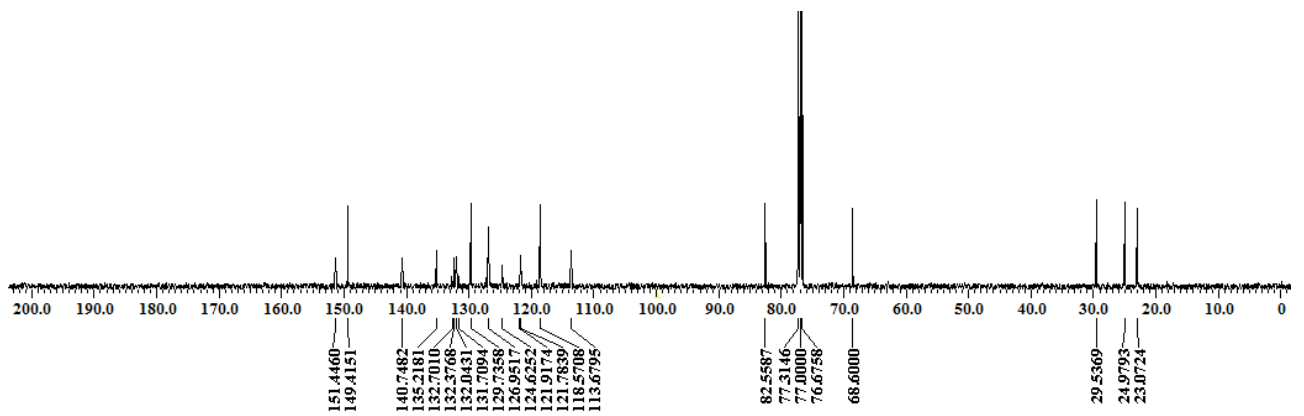

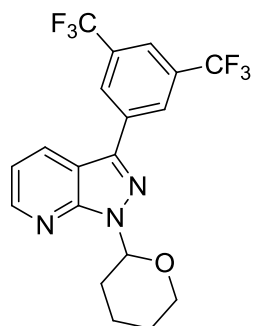

3-(3,5-bis(trifluoromethyl)phenyl)-1-(tetrahydro-2H-pyran-2-yl)-1H-pyrazolo[3,4-b]pyridine (**3ac**)

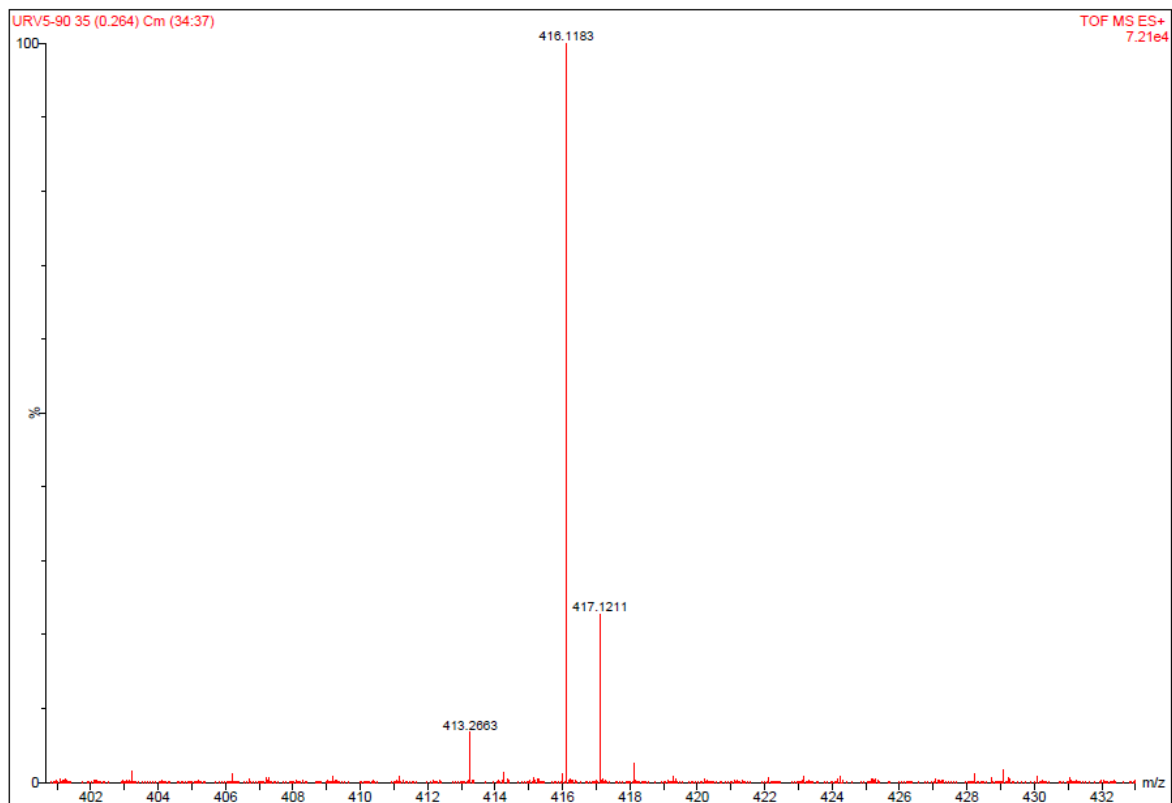

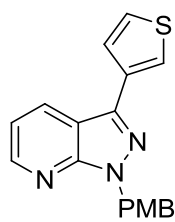

1-(4-methoxybenzyl)-3-(thiophen-3-yl)-1*H*-pyrazolo[3,4-*b*]pyridine (**3ad**)

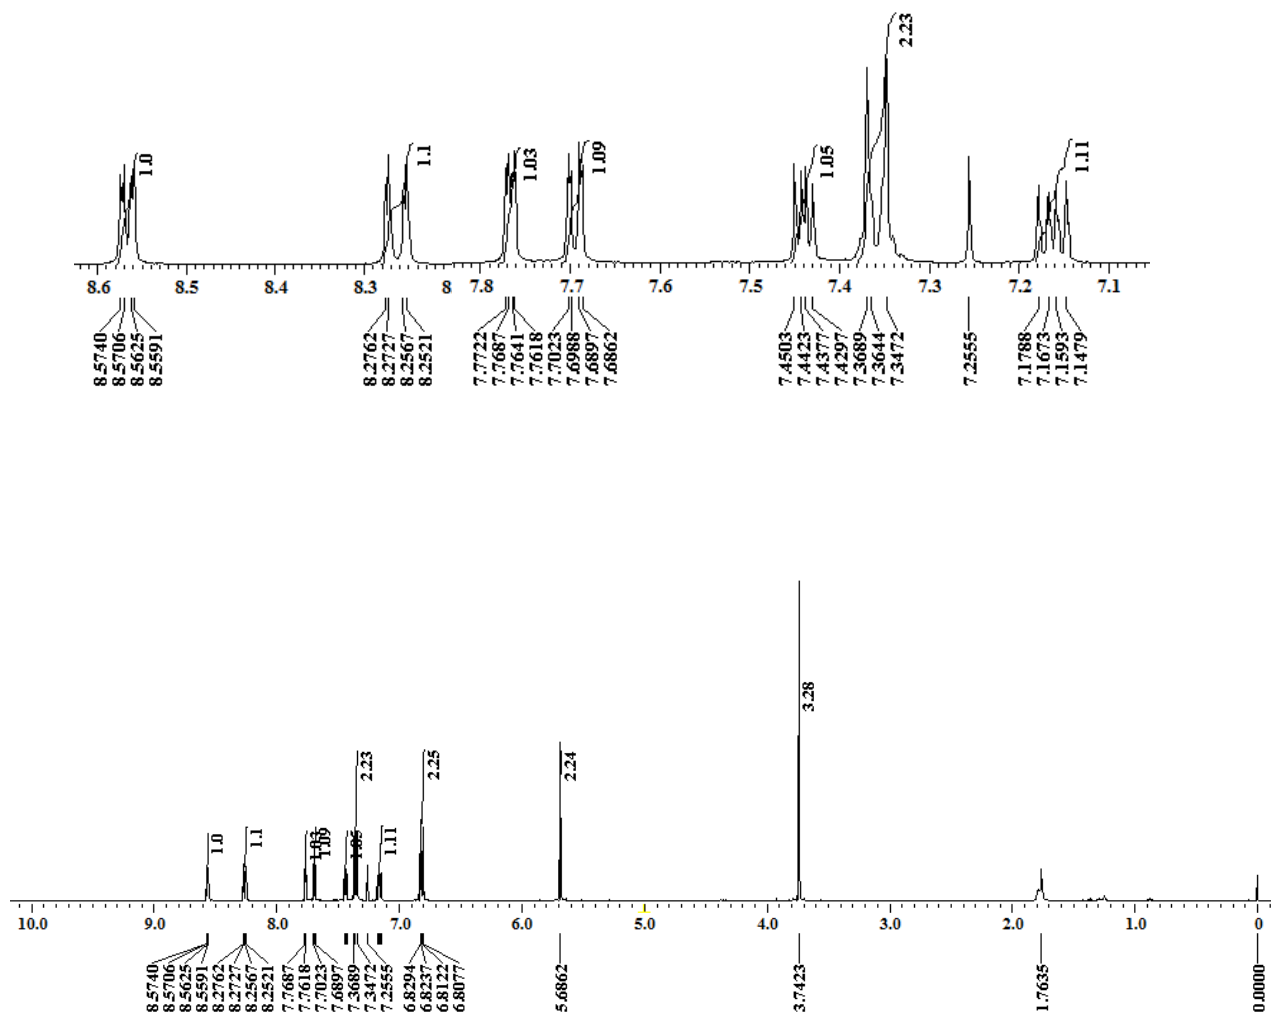

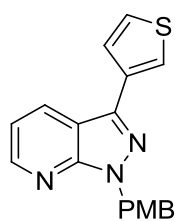

1-(4-methoxybenzyl)-3-(thiophen-3-yl)-1H-pyrazolo[3,4-b]pyridine (3ad)

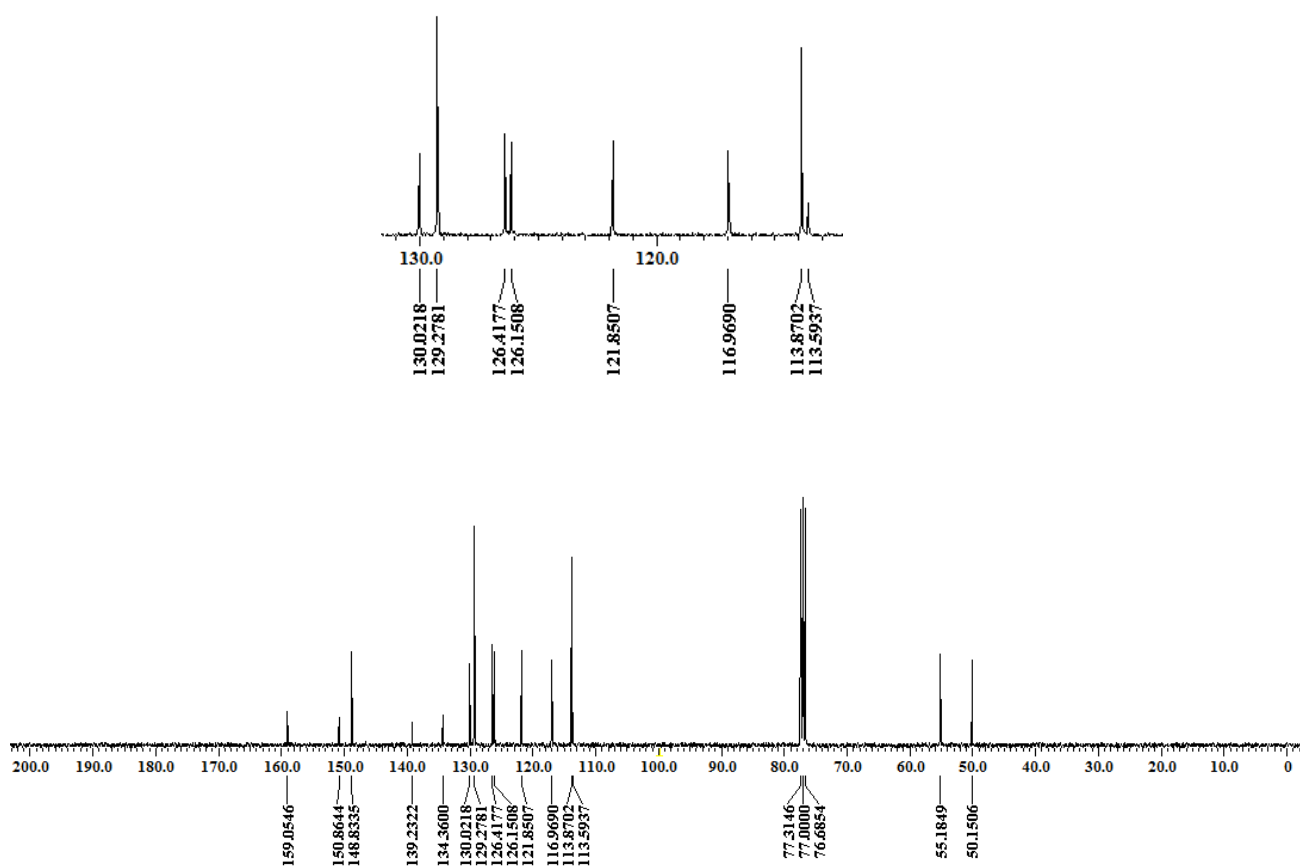



1-(4-methoxybenzyl)-3-(thiophen-3-yl)-1H-pyrazolo[3,4-b]pyridine (**3ad**)

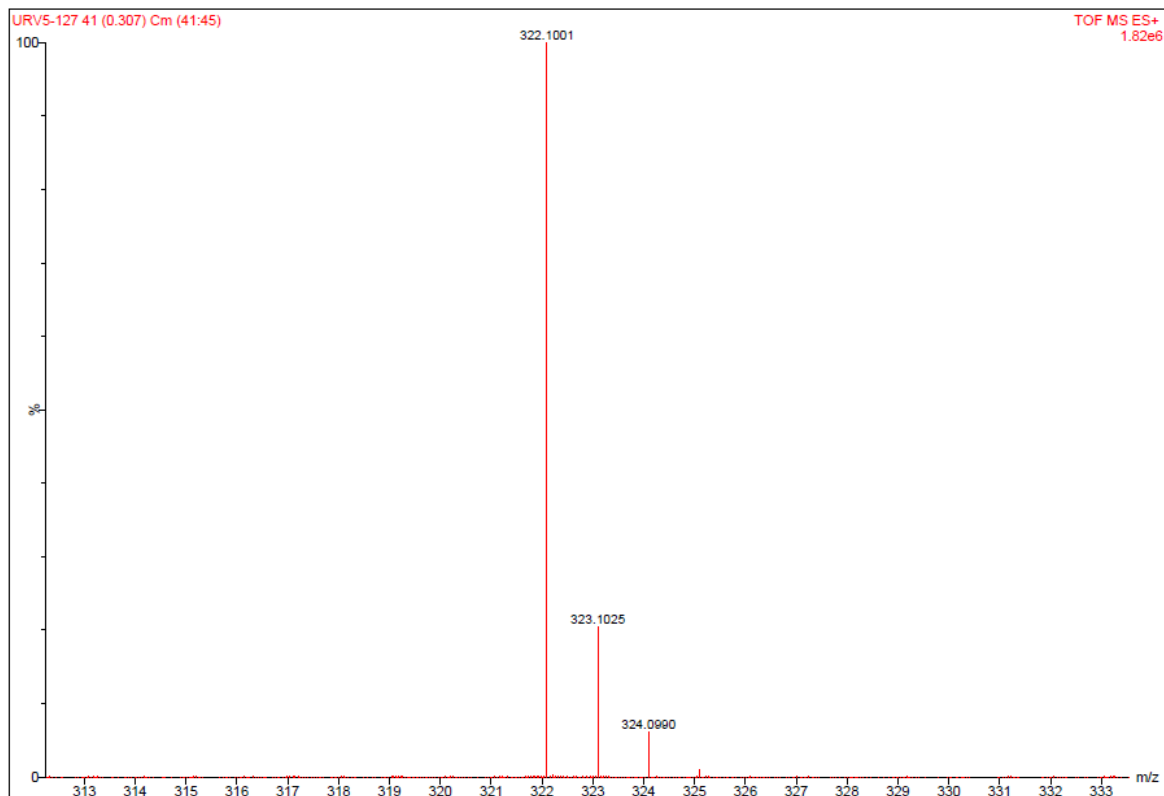

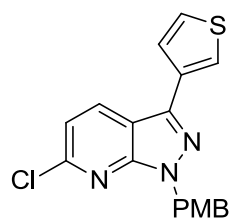

6-chloro-1-(4-methoxybenzyl)-3-(thiophen-3-yl)-1*H*-pyrazolo[3,4-*b*]pyridine (**3ae**)

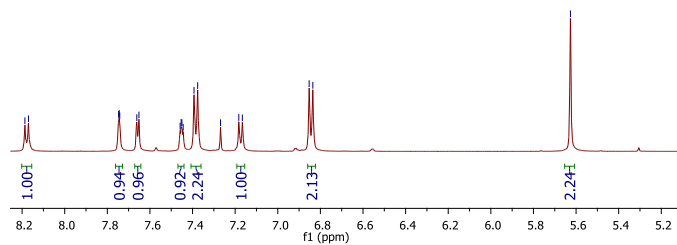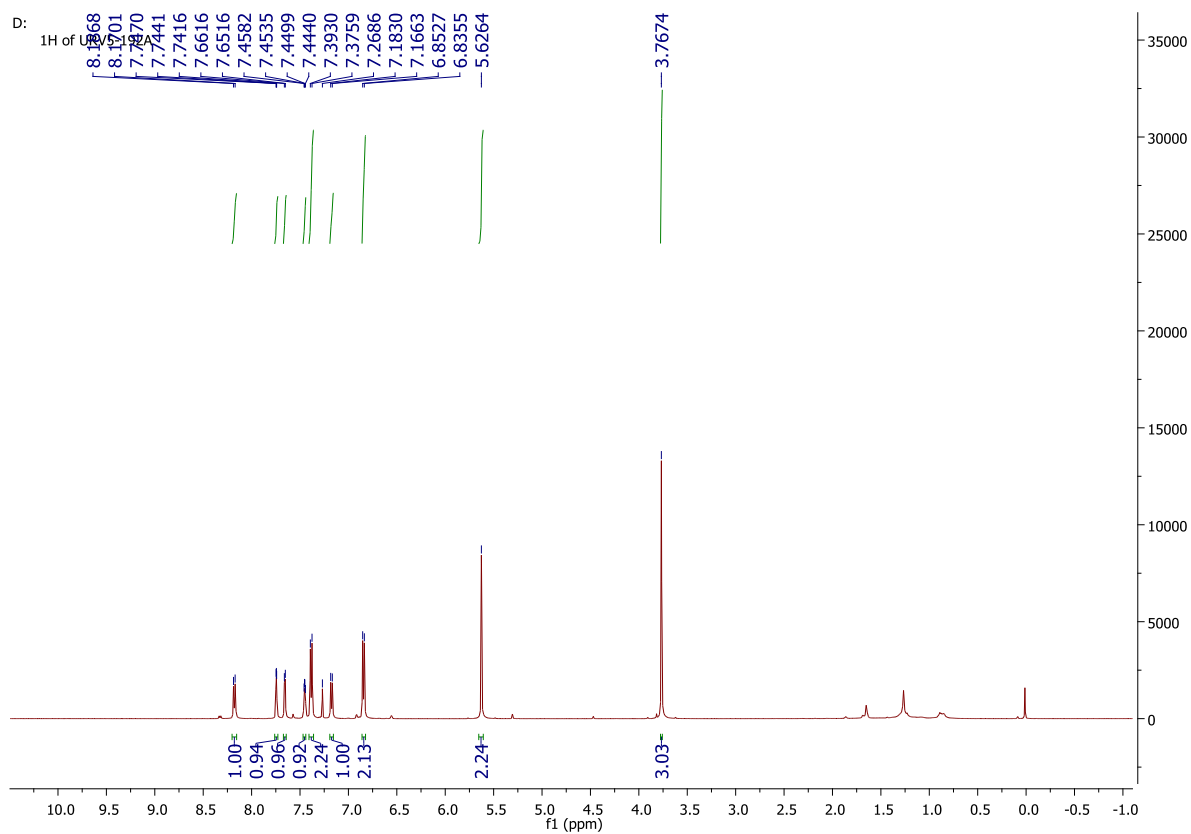





6-chloro-1-(4-methoxybenzyl)-3-(thiophen-3-yl)-1H-pyrazolo[3,4-b]pyridine (**3ae**)

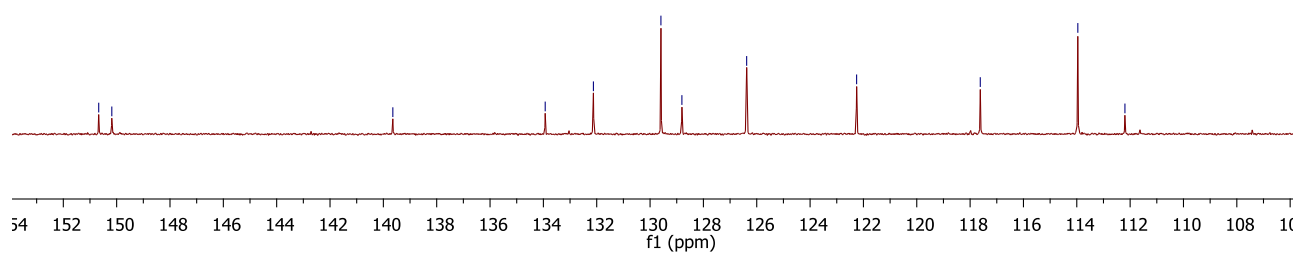

D:  
13 C of URV5-192A

159.2531  
150.6725  
150.1815  
139.6444  
133.9313  
132.1239  
129.5929  
128.8060  
126.3779  
122.2551  
117.6186  
113.9612  
112.1951

77.3010  
77.0470  
76.7929

55.2495  
50.2994

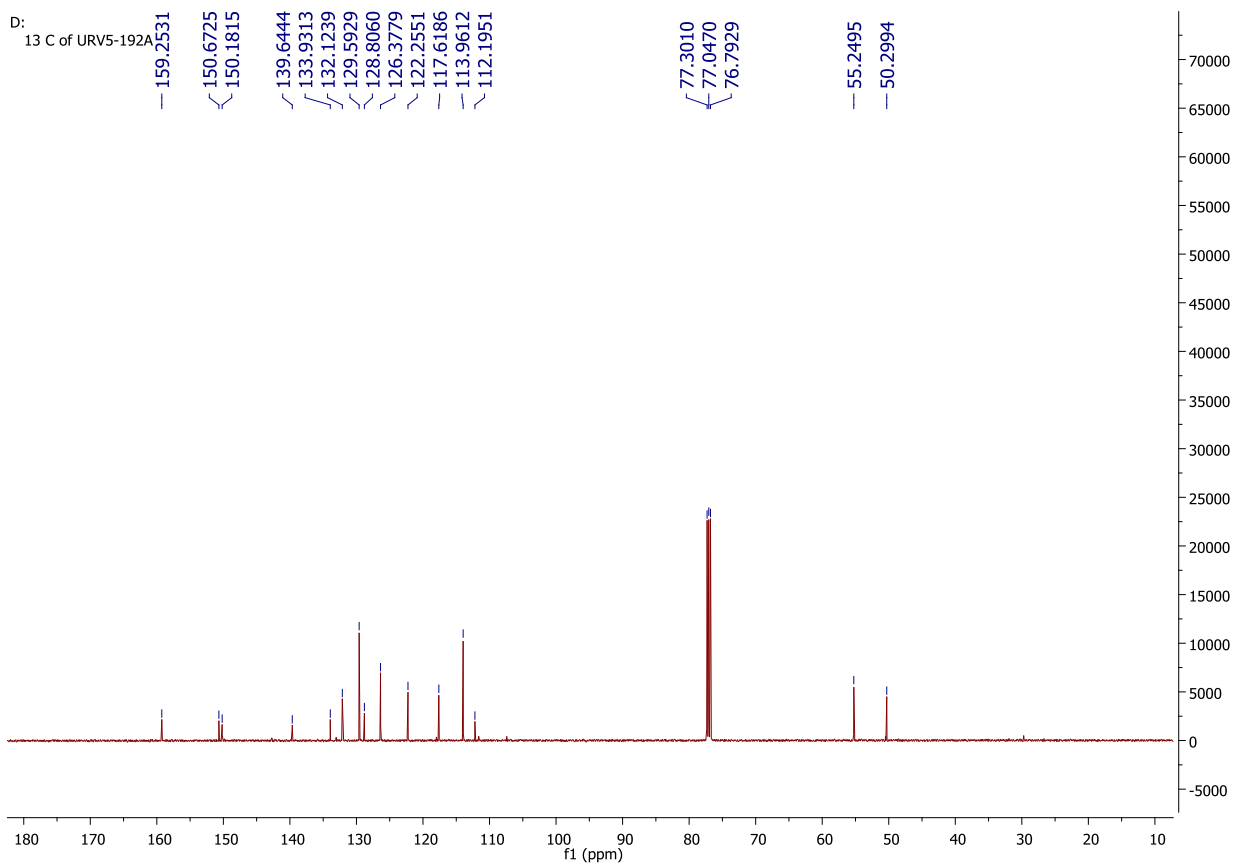

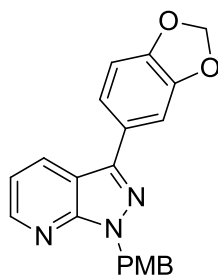

3-(benzo[d][1,3]dioxol-5-yl)-1-(4-methoxybenzyl)-1H-pyrazolo[3,4-b]pyridine (**3af**)

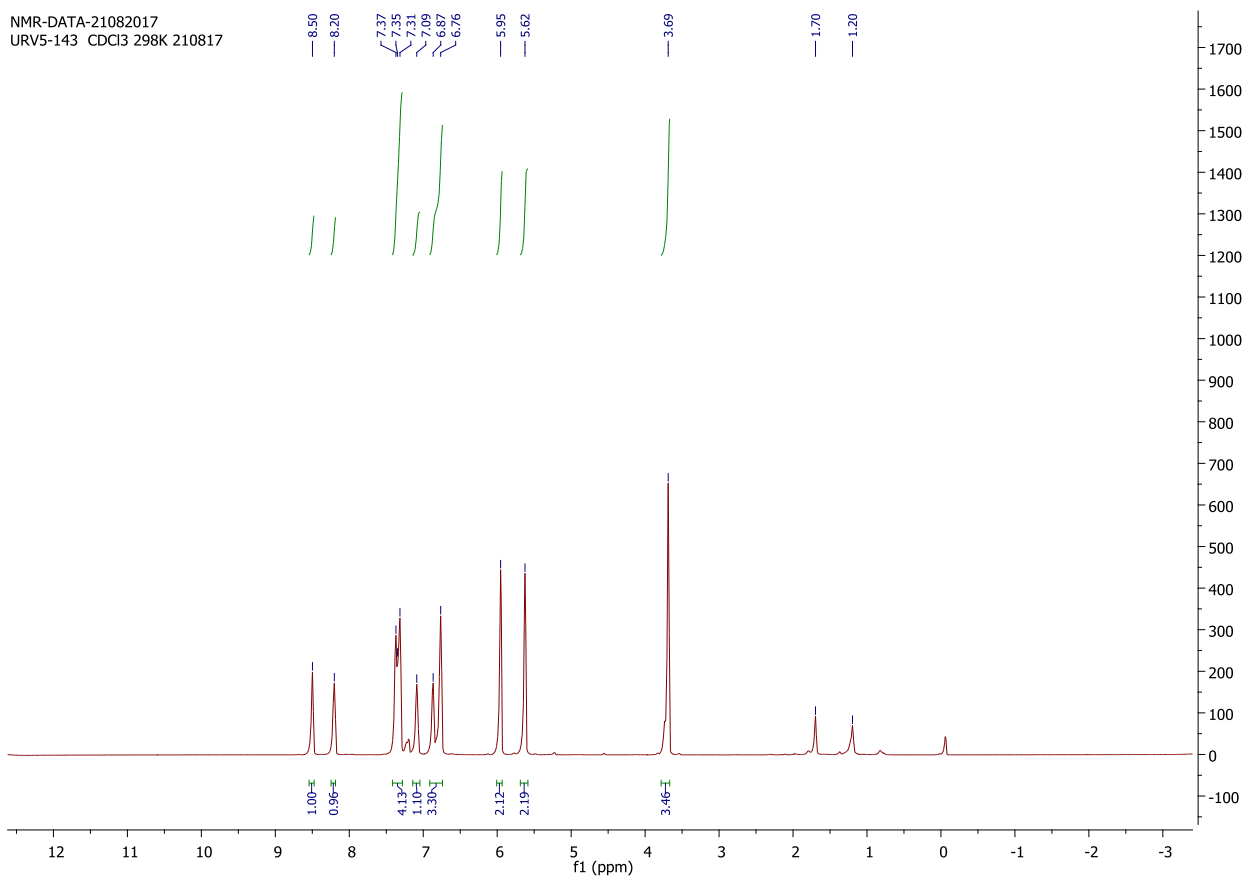

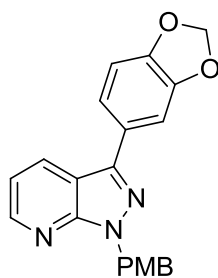

3-(benzo[d][1,3]dioxol-5-yl)-1-(4-methoxybenzyl)-1H-pyrazolo[3,4-b]pyridine (**3af**)

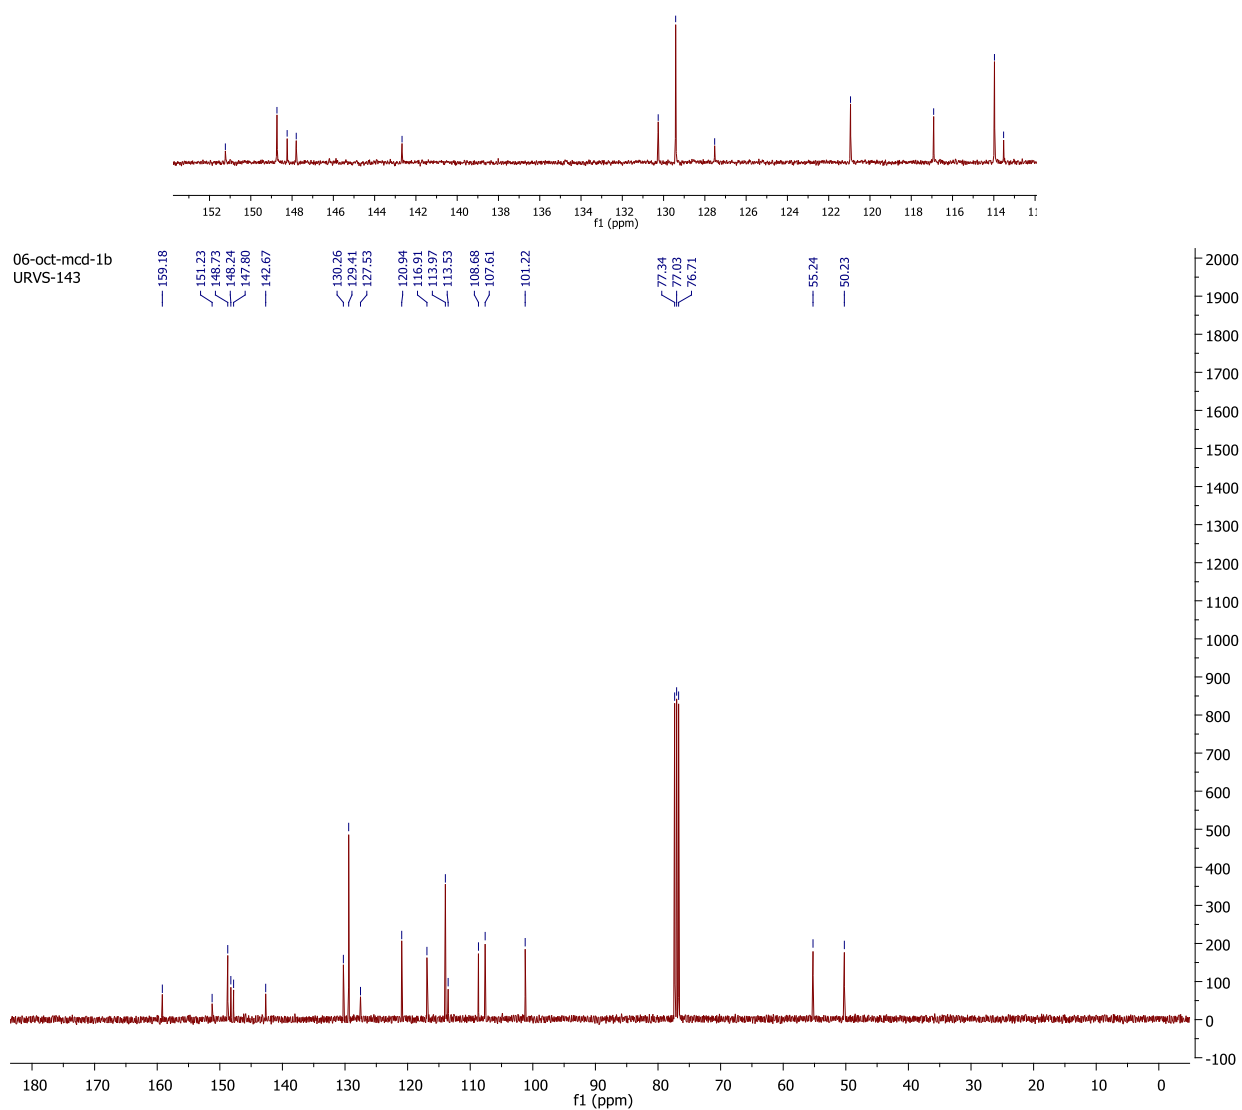

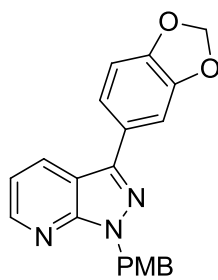

3-(benzo[d][1,3]dioxol-5-yl)-1-(4-methoxybenzyl)-1*H*-pyrazolo[3,4-*b*]pyridine (**3af**)

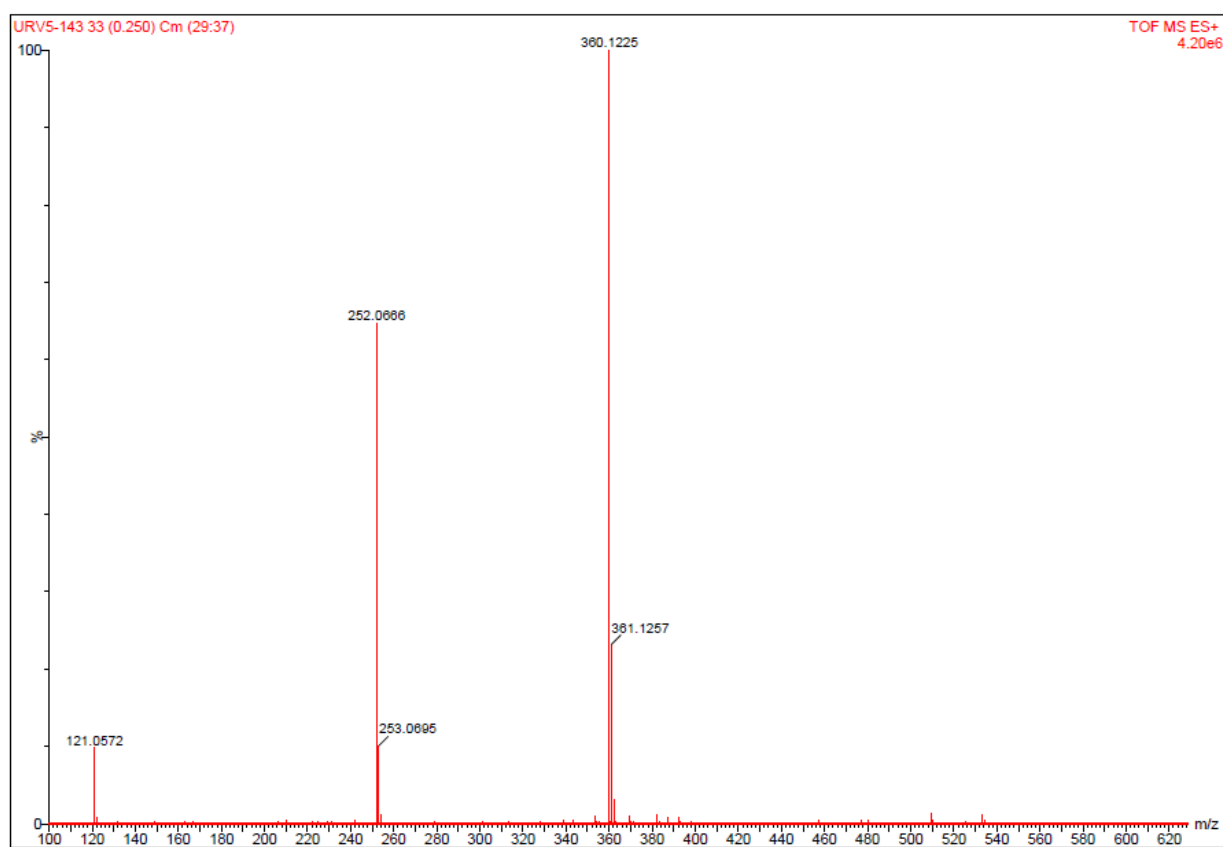

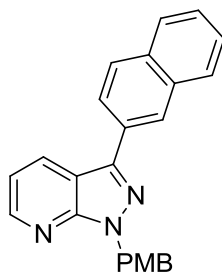

1-(4-methoxybenzyl)-3-(naphthalen-2-yl)-1*H*-pyrazolo[3,4-*b*]pyridine (**3ag**)

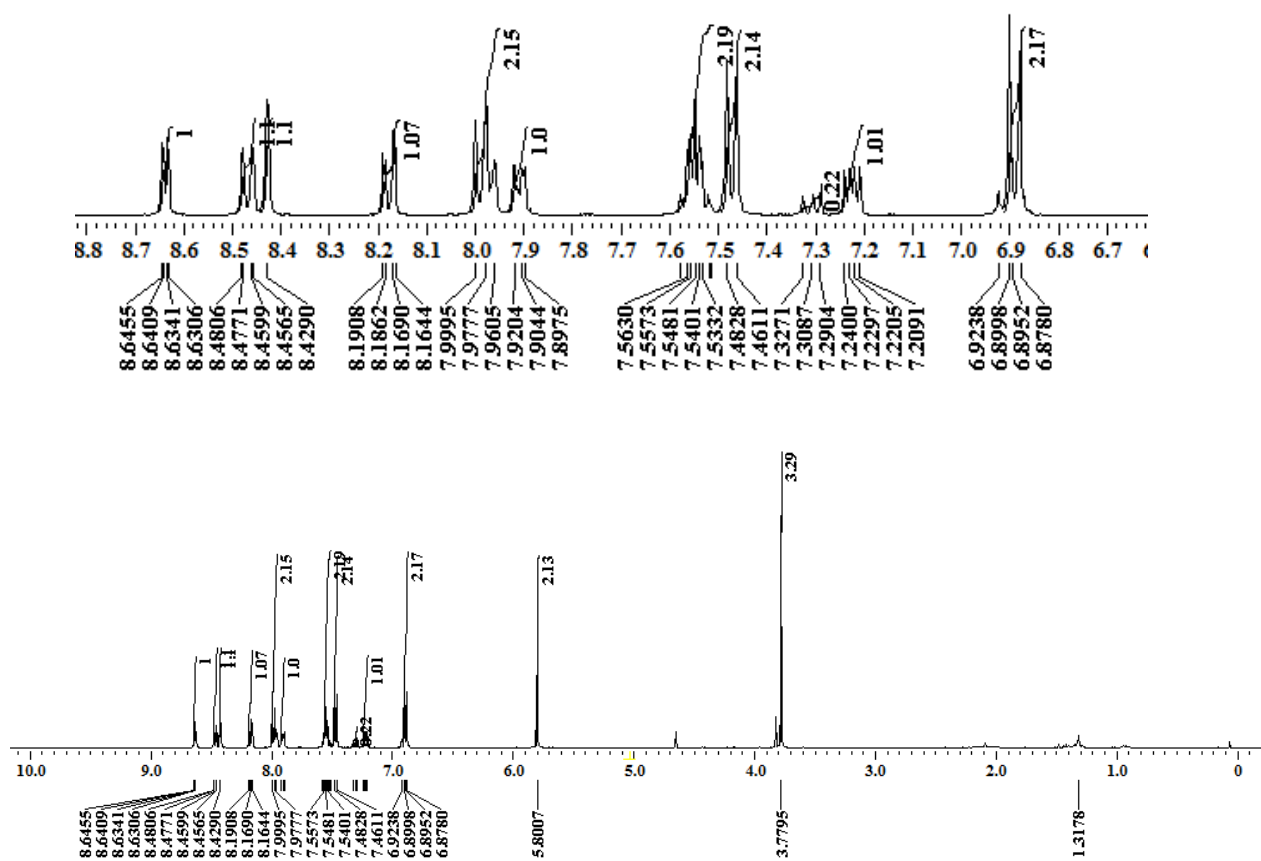



1-(4-methoxybenzyl)-3-(naphthalen-2-yl)-1*H*-pyrazolo[3,4-*b*]pyridine (**3ag**)

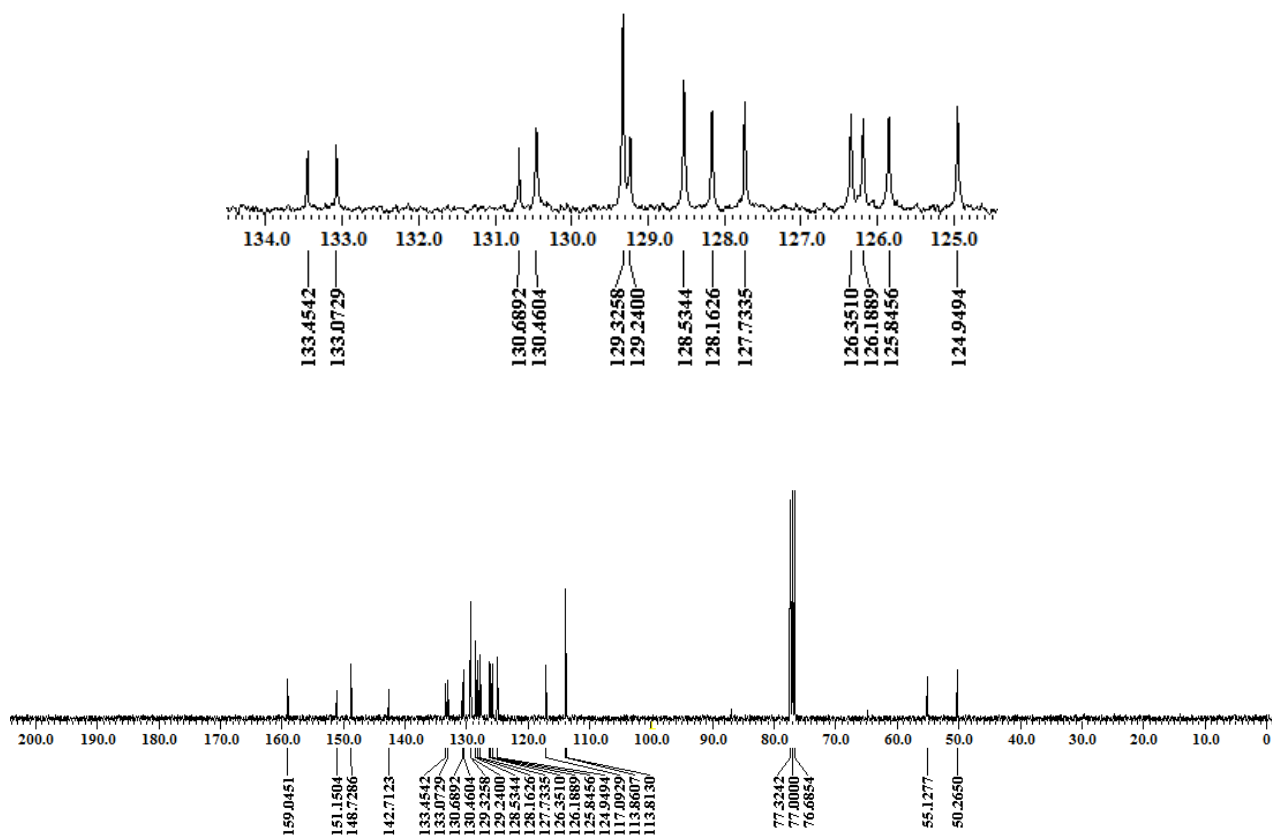

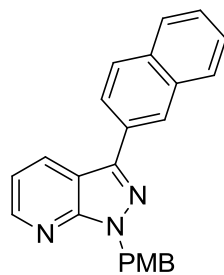

1-(4-methoxybenzyl)-3-(naphthalen-2-yl)-1*H*-pyrazolo[3,4-*b*]pyridine (**3ag**)

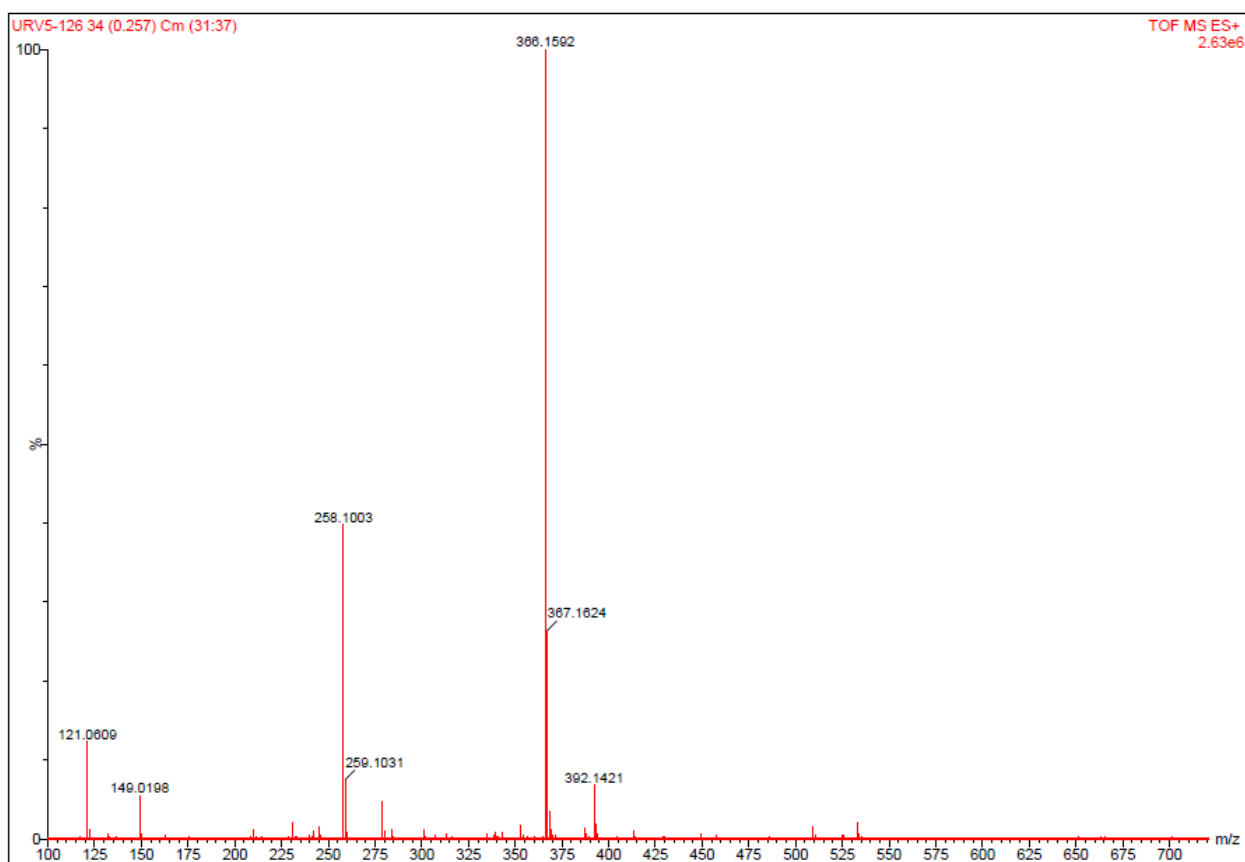

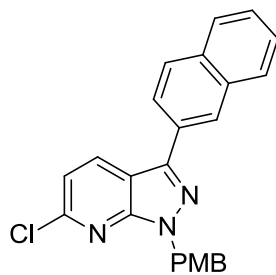

6-chloro-1-(4-methoxybenzyl)-3-(naphthalen-2-yl)-1H-pyrazolo[3,4-b]pyridine (**3ah**)

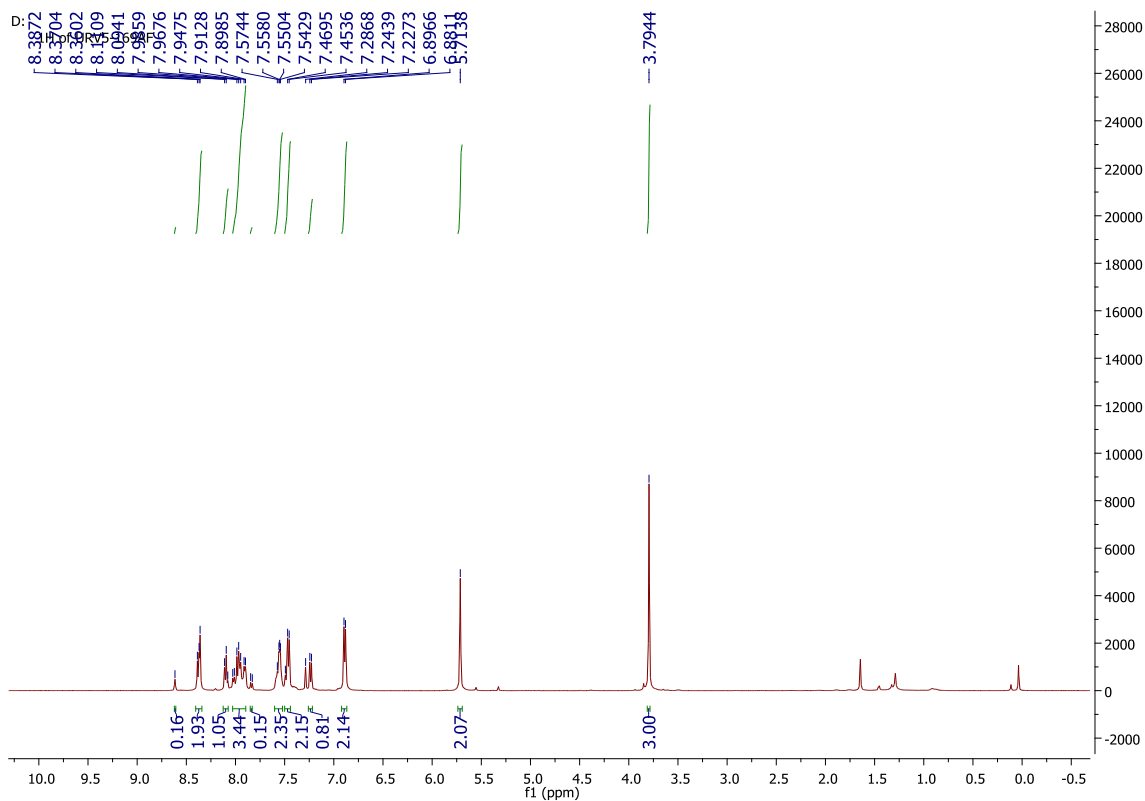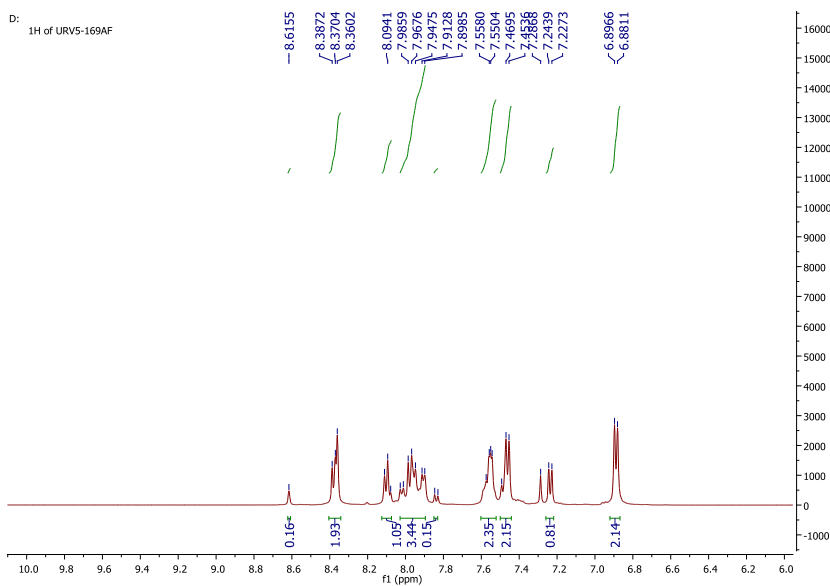



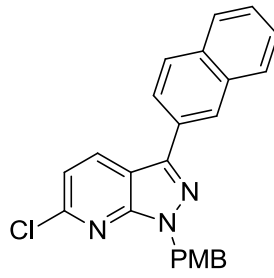

6-chloro-1-(4-methoxybenzyl)-3-(naphthalen-2-yl)-1H-pyrazolo[3,4-b]pyridine (**3ah**)

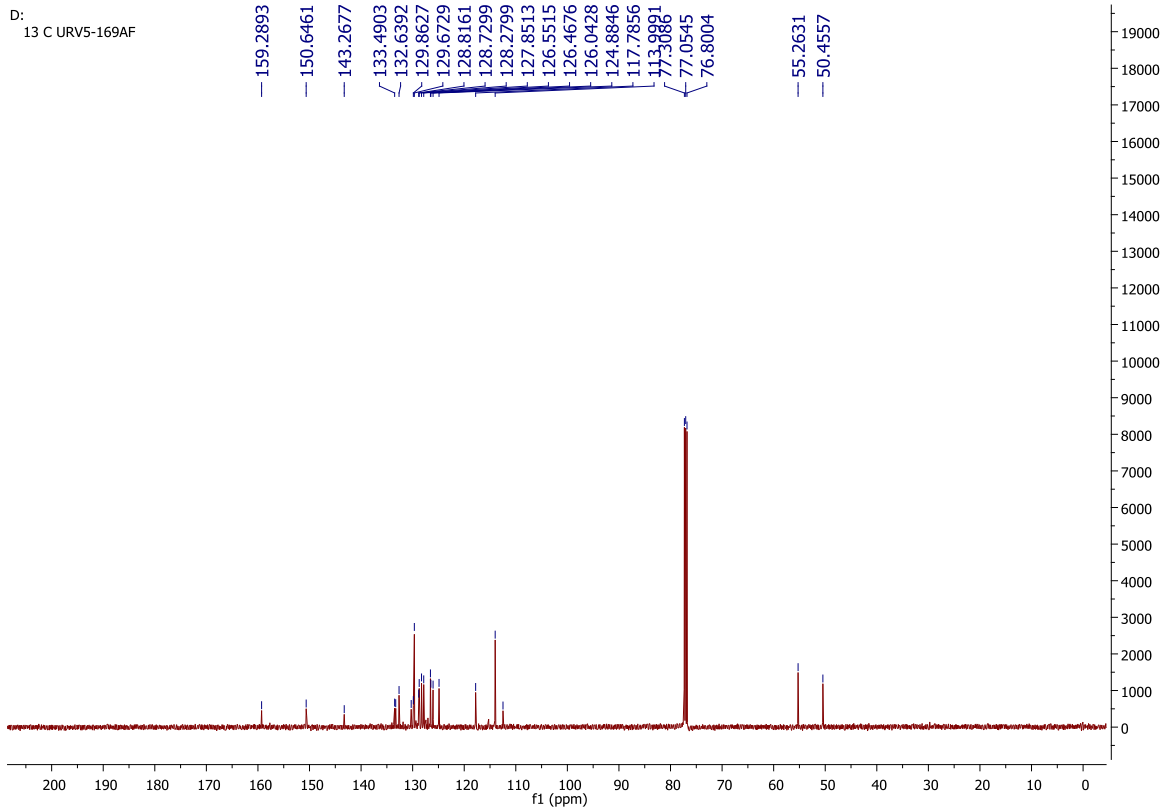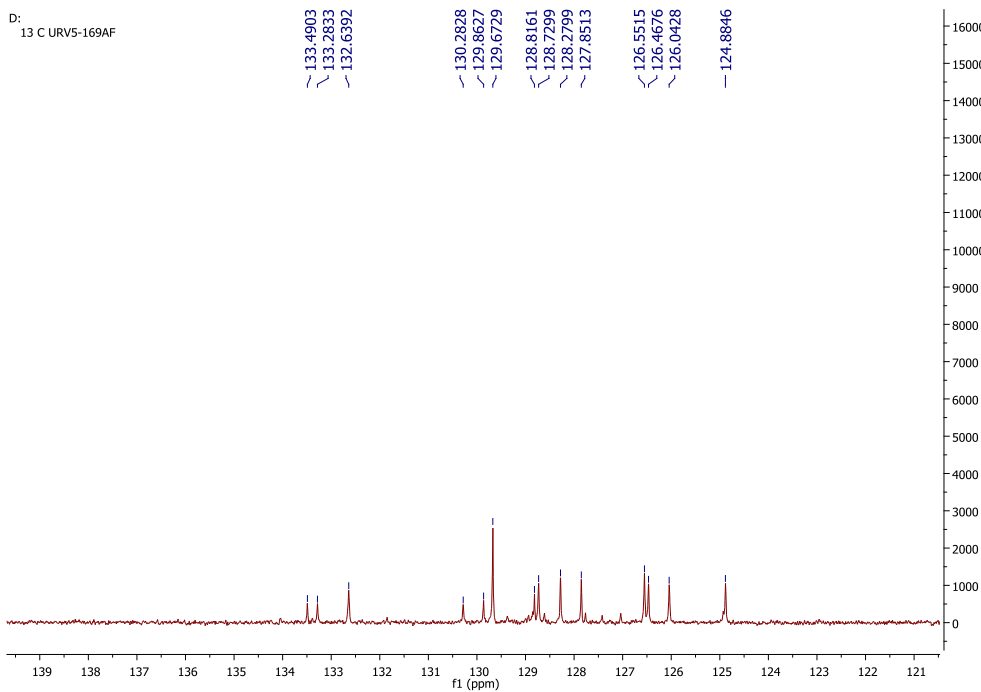

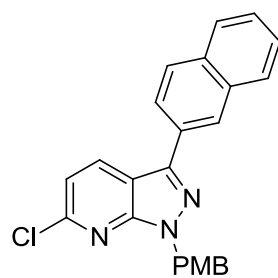

6-chloro-1-(4-methoxybenzyl)-3-(naphthalen-2-yl)-1H-pyrazolo[3,4-b]pyridine (**3ah**)

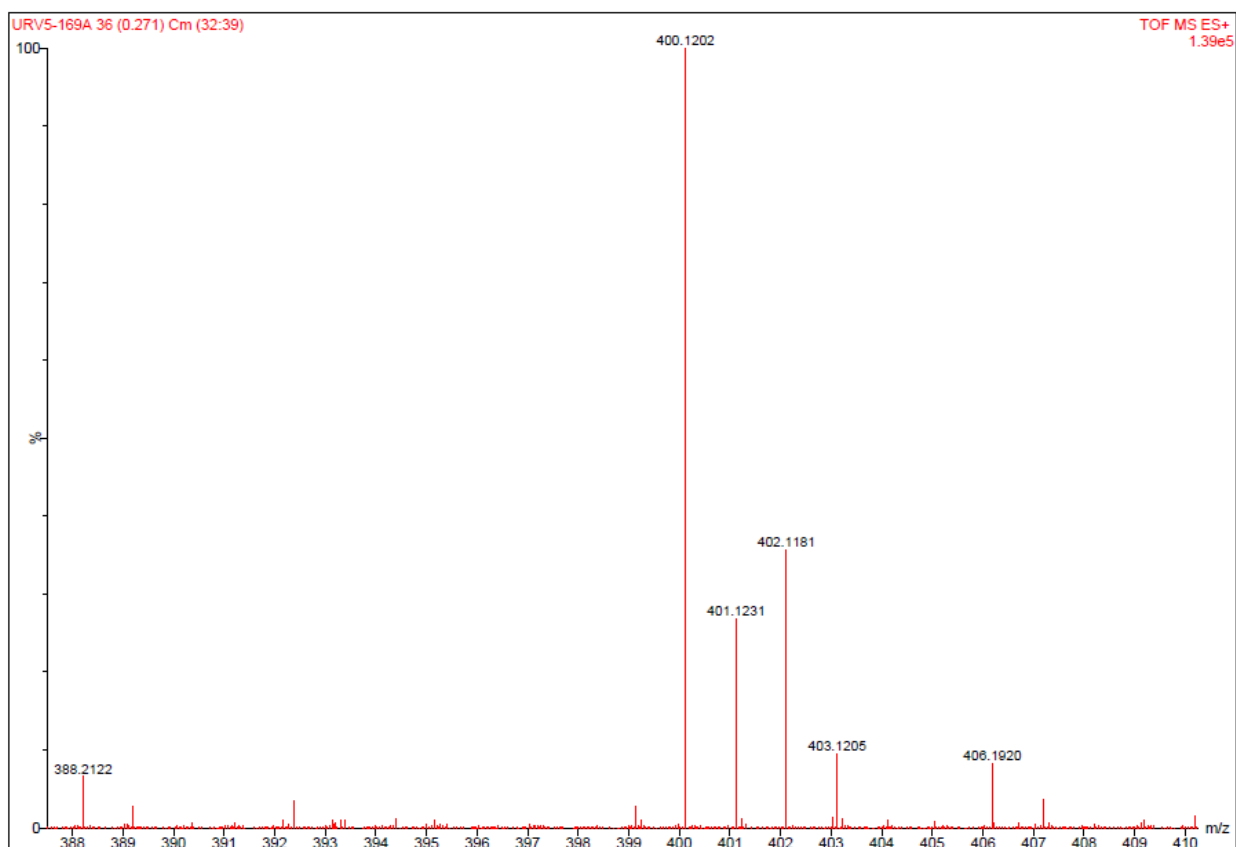

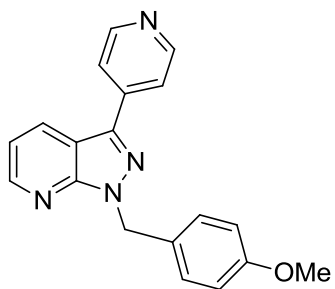

1-(4-methoxybenzyl)-3-(pyridin-4-yl)-1*H*-pyrazolo[3,4-*b*]pyridine (**3ai**)

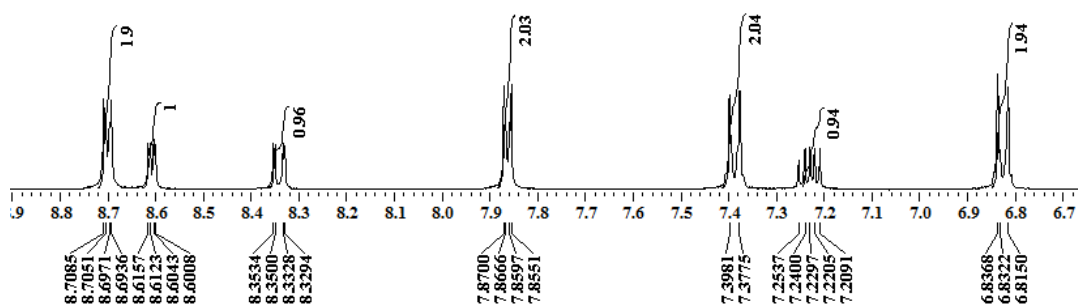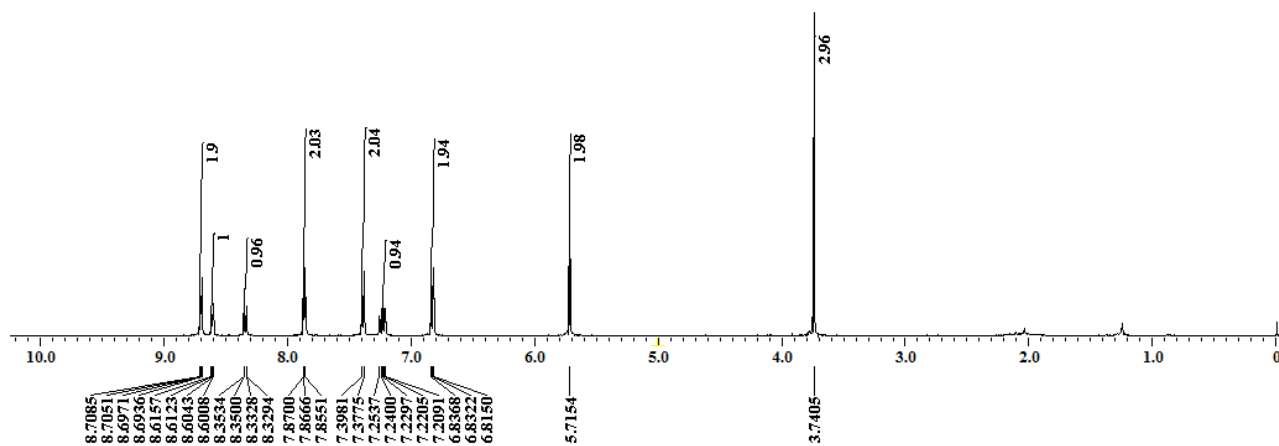



1-(4-methoxybenzyl)-3-(pyridin-4-yl)-1H-pyrazolo[3,4-b]pyridine (**3ai**)

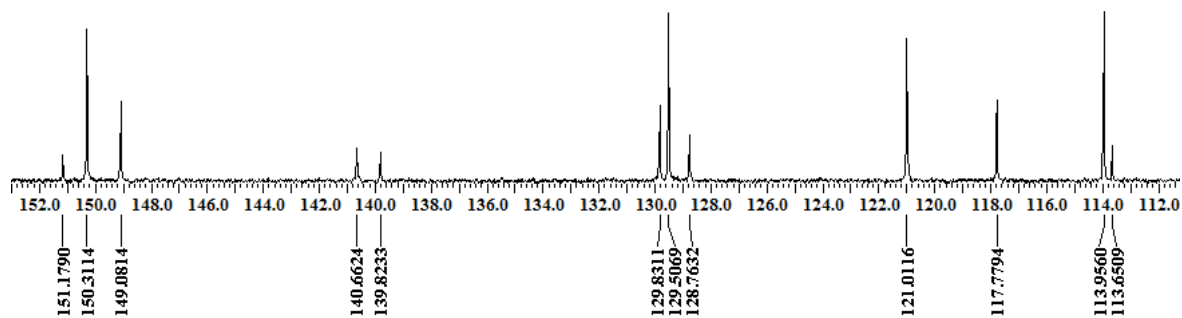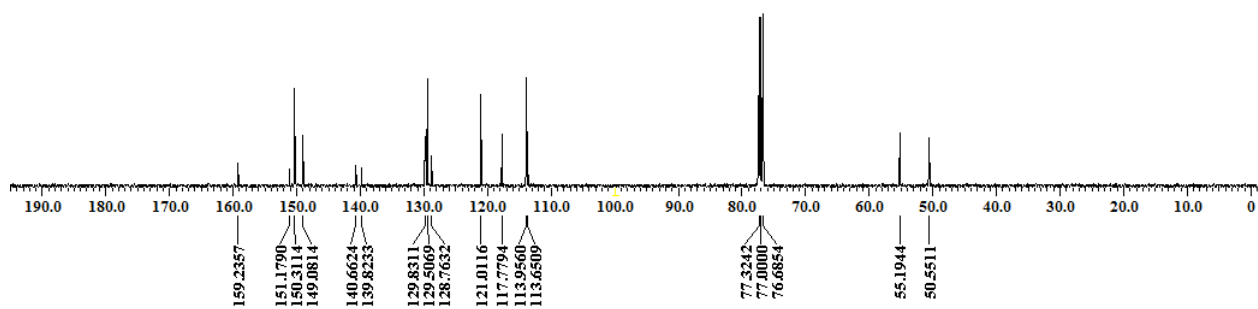

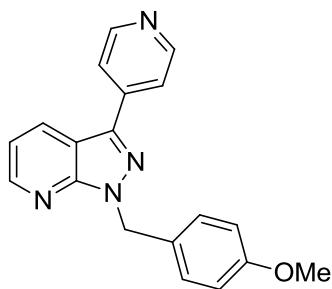

1-(4-methoxybenzyl)-3-(pyridin-4-yl)-1H-pyrazolo[3,4-b]pyridine (**3ai**)

## Qualitative Compound Report

|                        |              |               |                     |
|------------------------|--------------|---------------|---------------------|
| Data File              | URV5-89.d    | Sample Name   | URV5-89             |
| Sample Type            | Sample       | Position      | P1-C3               |
| Instrument Name        | Instrument 1 | User Name     |                     |
| Acq Method             | 29.10.2014.m | Acquired Time | 25-05-2017 13:02:05 |
| IRM Calibration Status | Success      | DA Method     | Default.m           |
| Comment                |              |               |                     |

|                |                             |       |
|----------------|-----------------------------|-------|
| Sample Group   |                             | Info. |
| Acquisition SW | 6200 series TOF/6500 series |       |
| Version        | Q-TOF B.05.01 (B5125)       |       |

### Compound Table

| Compound Label      | RT | Mass     | Formula      | MFG Formula  | MFG Diff (ppm) | DB Formula   |
|---------------------|----|----------|--------------|--------------|----------------|--------------|
| Cpd 1: C19 H16 N4 O | 11 | 316.1332 | C19 H16 N4 O | C19 H16 N4 O | -2.6           | C19 H16 N4 O |

| Compound Label      | m/z      | RT | Algorithm                 | Mass     |
|---------------------|----------|----|---------------------------|----------|
| Cpd 1: C19 H16 N4 O | 317.1405 | 11 | Find by Molecular Feature | 316.1332 |

### MFE MS Spectrum

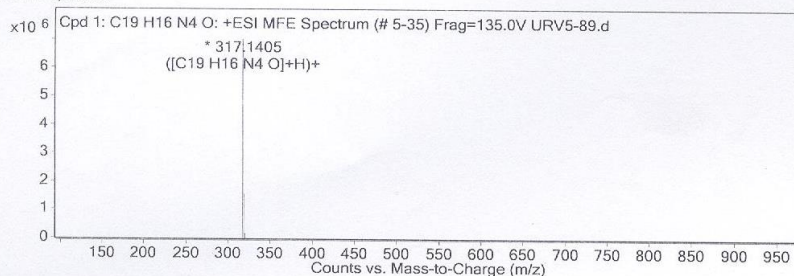

### MFE MS Zoomed Spectrum

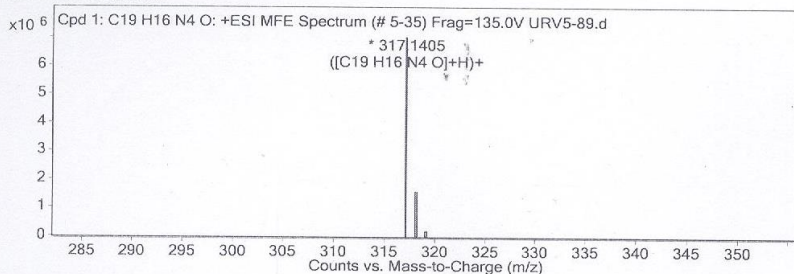

### MS Spectrum Peak List

| m/z      | z | Abund      | Formula      | Ion    |
|----------|---|------------|--------------|--------|
| 317.1405 | 1 | 7024204.5  | C19 H16 N4 O | (M+H)+ |
| 318.1436 | 1 | 1563277.56 | C19 H16 N4 O | (M+H)+ |
| 319.1469 | 1 | 167976.24  | C19 H16 N4 O | (M+H)+ |
| 320.15   | 1 | 13228.89   | C19 H16 N4 O | (M+H)+ |
| 321.1483 | 1 | 1212.23    | C19 H16 N4 O | (M+H)+ |

--- End Of Report ---

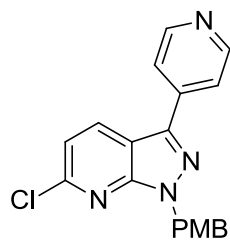

6-chloro-1-(4-methoxybenzyl)-3-(pyridin-4-yl)-1*H*-pyrazolo[3,4-*b*]pyridine (**3aj**)

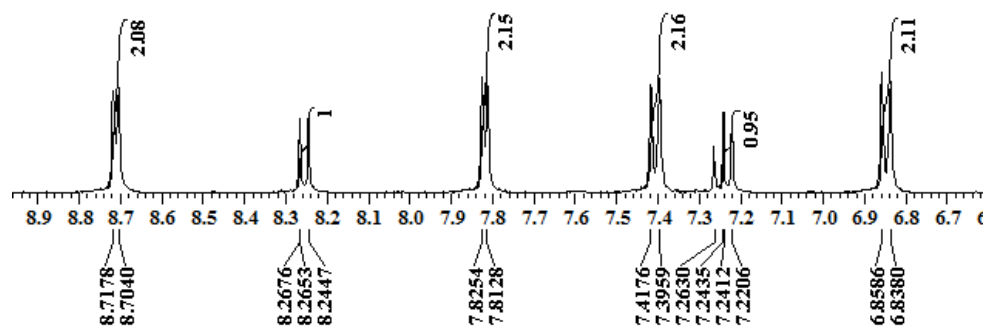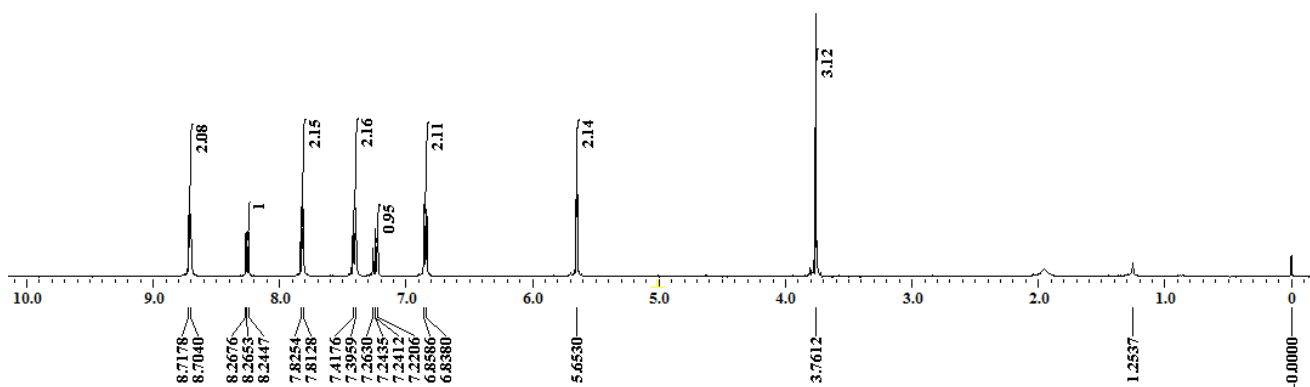

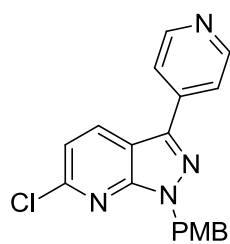

6-chloro-1-(4-methoxybenzyl)-3-(pyridin-4-yl)-1*H*-pyrazolo[3,4-*b*]pyridine (**3aj**)

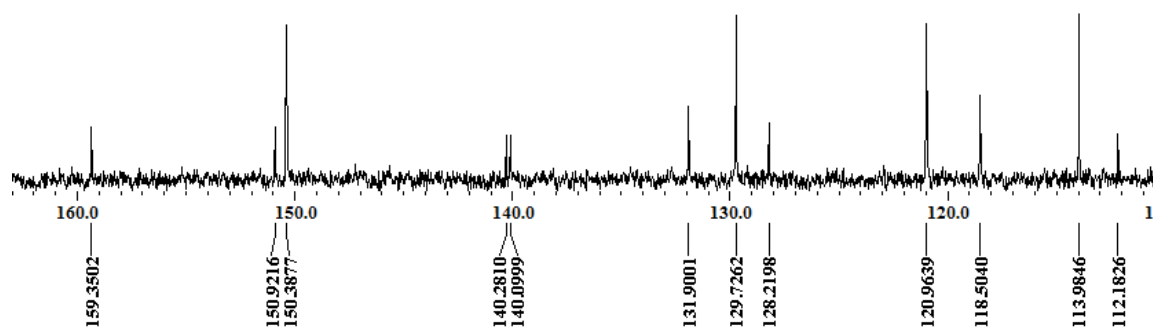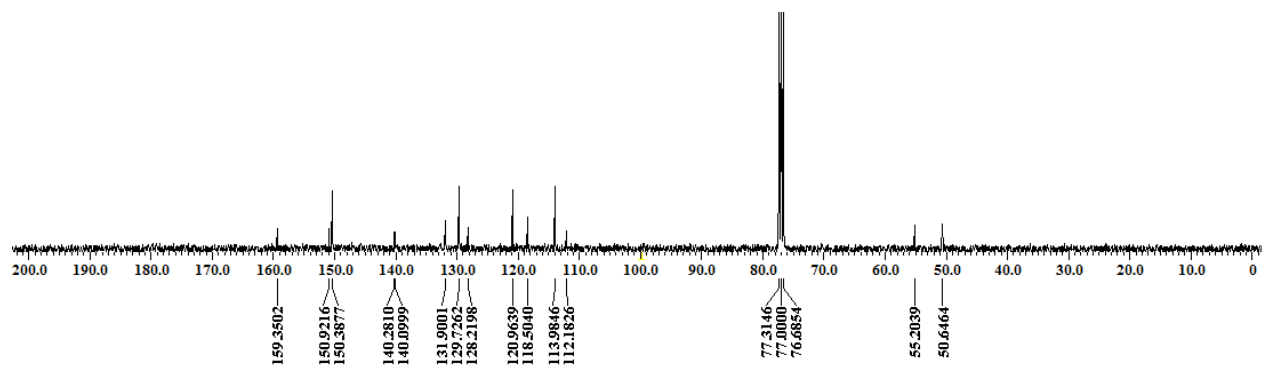



6-chloro-1-(4-methoxybenzyl)-3-(pyridin-4-yl)-1*H*-pyrazolo[3,4-*b*]pyridine (**3aj**)

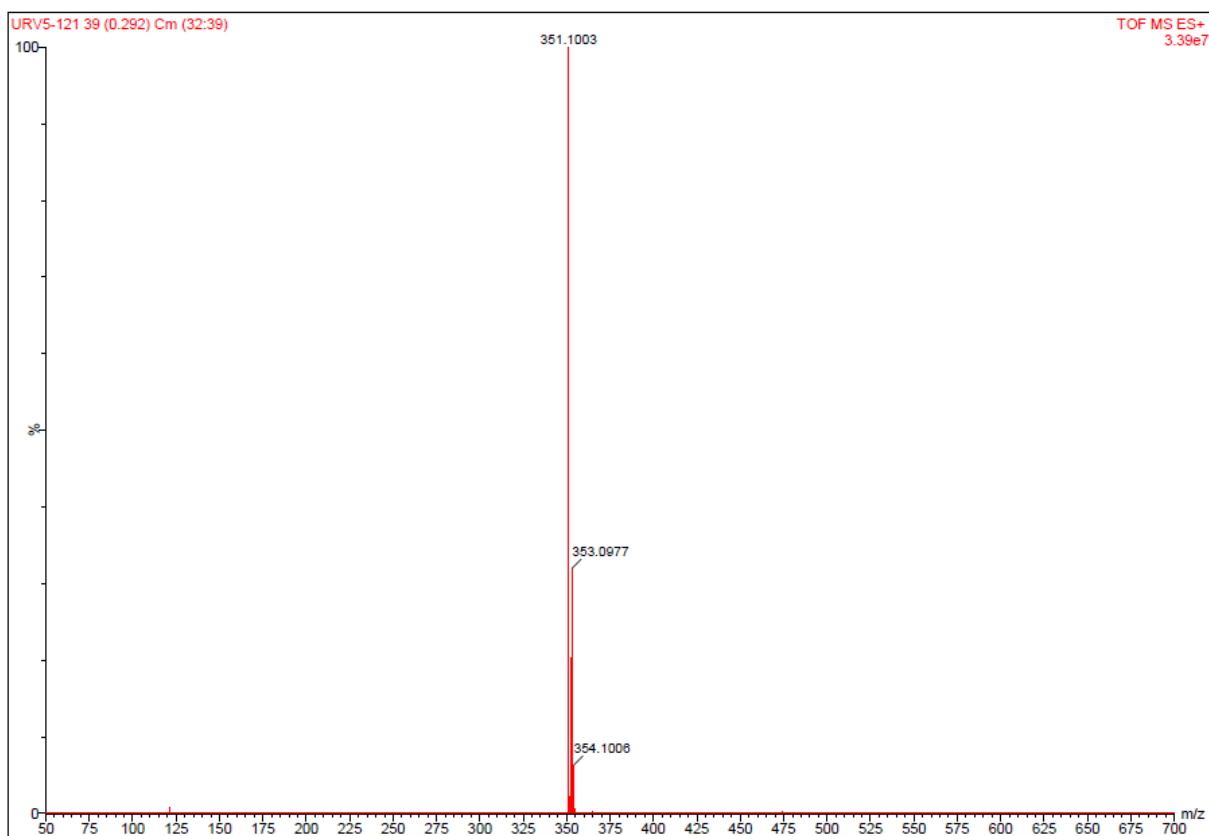



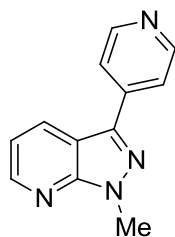

1-methyl-3-(pyridin-4-yl)-1*H*-pyrazolo[3,4-*b*]pyridine (**3ak**)

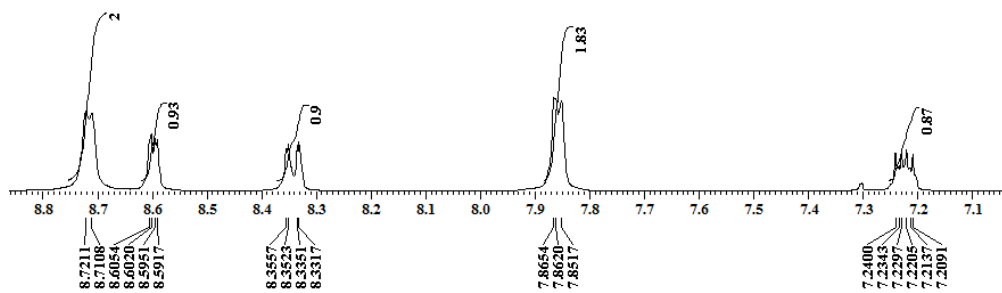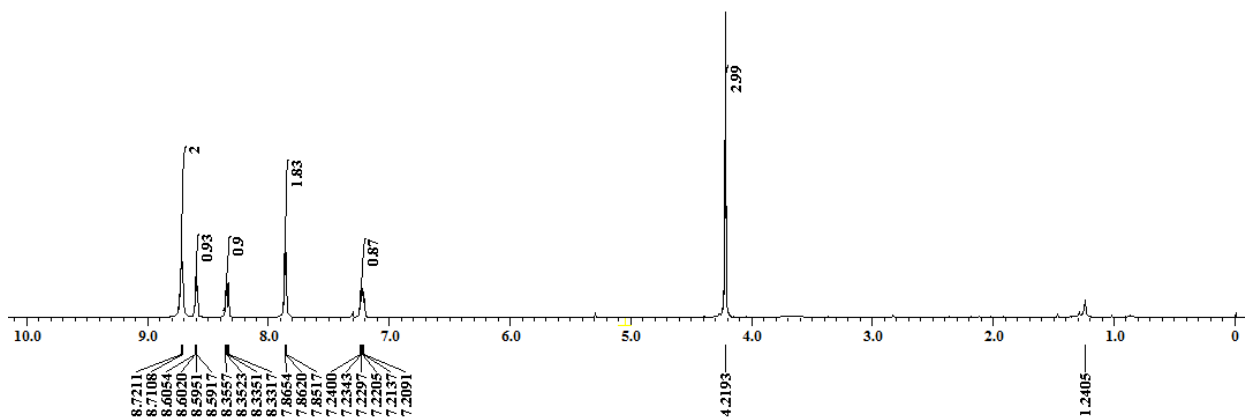

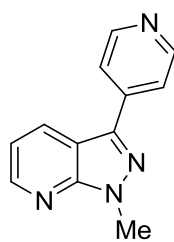

1-methyl-3-(pyridin-4-yl)-1H-pyrazolo[3,4-b]pyridine (**3ak**)

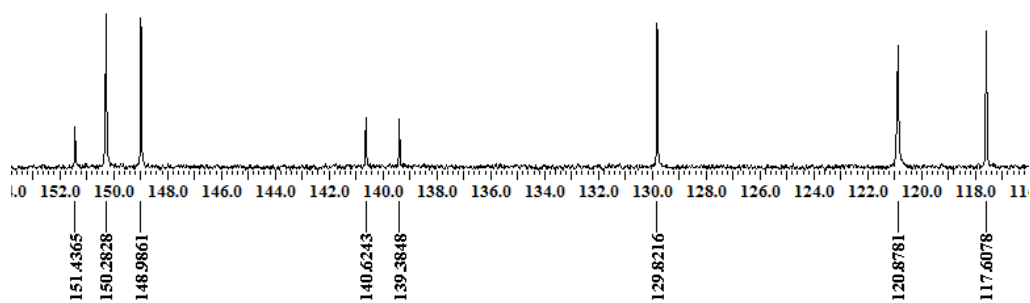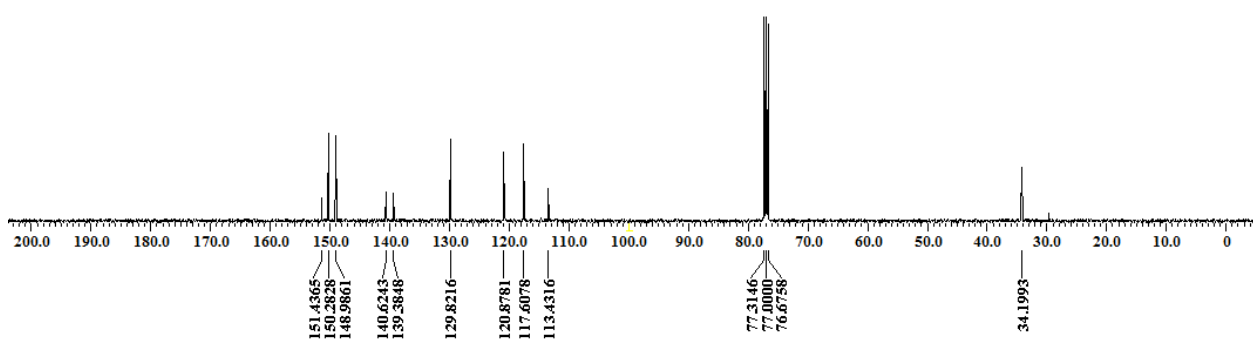

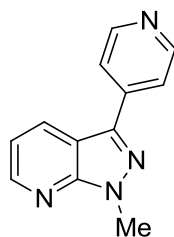

1-methyl-3-(pyridin-4-yl)-1H-pyrazolo[3,4-b]pyridine (**3ak**)

## Qualitative Compound Report

|                        |              |               |                     |
|------------------------|--------------|---------------|---------------------|
| Data File              | URV5-85.d    | Sample Name   | URV5-85             |
| Sample Type            | Sample       | Position      | P1-A8               |
| Instrument Name        | Instrument 1 | User Name     |                     |
| Acq Method             | 29.10.2014.m | Acquired Time | 08-05-2017 13:53:42 |
| IRM Calibration Status | Success      | DA Method     | Default.m           |
| Comment                |              |               |                     |

|                |                             |       |
|----------------|-----------------------------|-------|
| Sample Group   |                             | Info. |
| Acquisition SW | 6200 series TOF/6500 series |       |
| Version        | Q-TOF B.05.01 (B5125)       |       |

### Compound Table

| Compound Label    | RT | Mass     | Formula    | MFG Formula | MFG Diff (ppm) | DB Formula |
|-------------------|----|----------|------------|-------------|----------------|------------|
| Cpd 1: C12 H10 N4 | 11 | 210.0909 | C12 H10 N4 | C12 H10 N4  | -1.64          | C12 H10 N4 |

| Compound Label    | m/z      | RT | Algorithm                 | Mass     |
|-------------------|----------|----|---------------------------|----------|
| Cpd 1: C12 H10 N4 | 211.0981 | 11 | Find by Molecular Feature | 210.0909 |

### MFE MS Spectrum

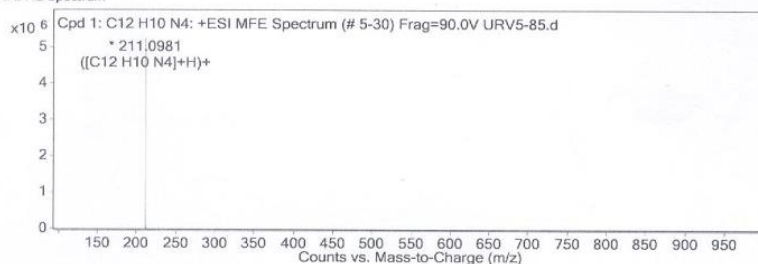

### MFE MS Zoomed Spectrum

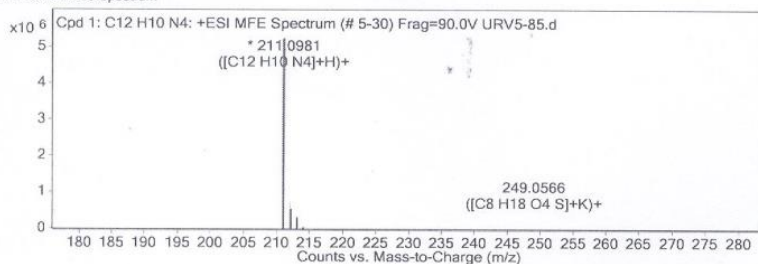

### MS Spectrum Peak List

| m/z      | z | Abund     | Formula     | Ion    |
|----------|---|-----------|-------------|--------|
| 211.0981 | 1 | 5253705.5 | C12 H10 N4  | (M+H)+ |
| 212.1011 | 1 | 749166.59 | C12 H10 N4  | (M+H)+ |
| 213.1041 | 1 | 46007.94  | C12 H10 N4  | (M+H)+ |
| 214.1067 | 1 | 1751.98   | C12 H10 N4  | (M+H)+ |
| 249.0566 | 1 | 886.49    | C8 H18 O4 S | (M+K)+ |

--- End Of Report ---

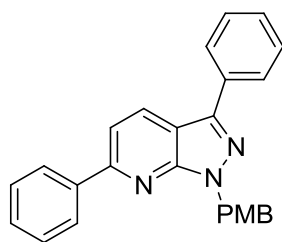

1-(4-methoxybenzyl)-3,6-diphenyl-1*H*-pyrazolo[3,4-*b*]pyridine (**4a**)

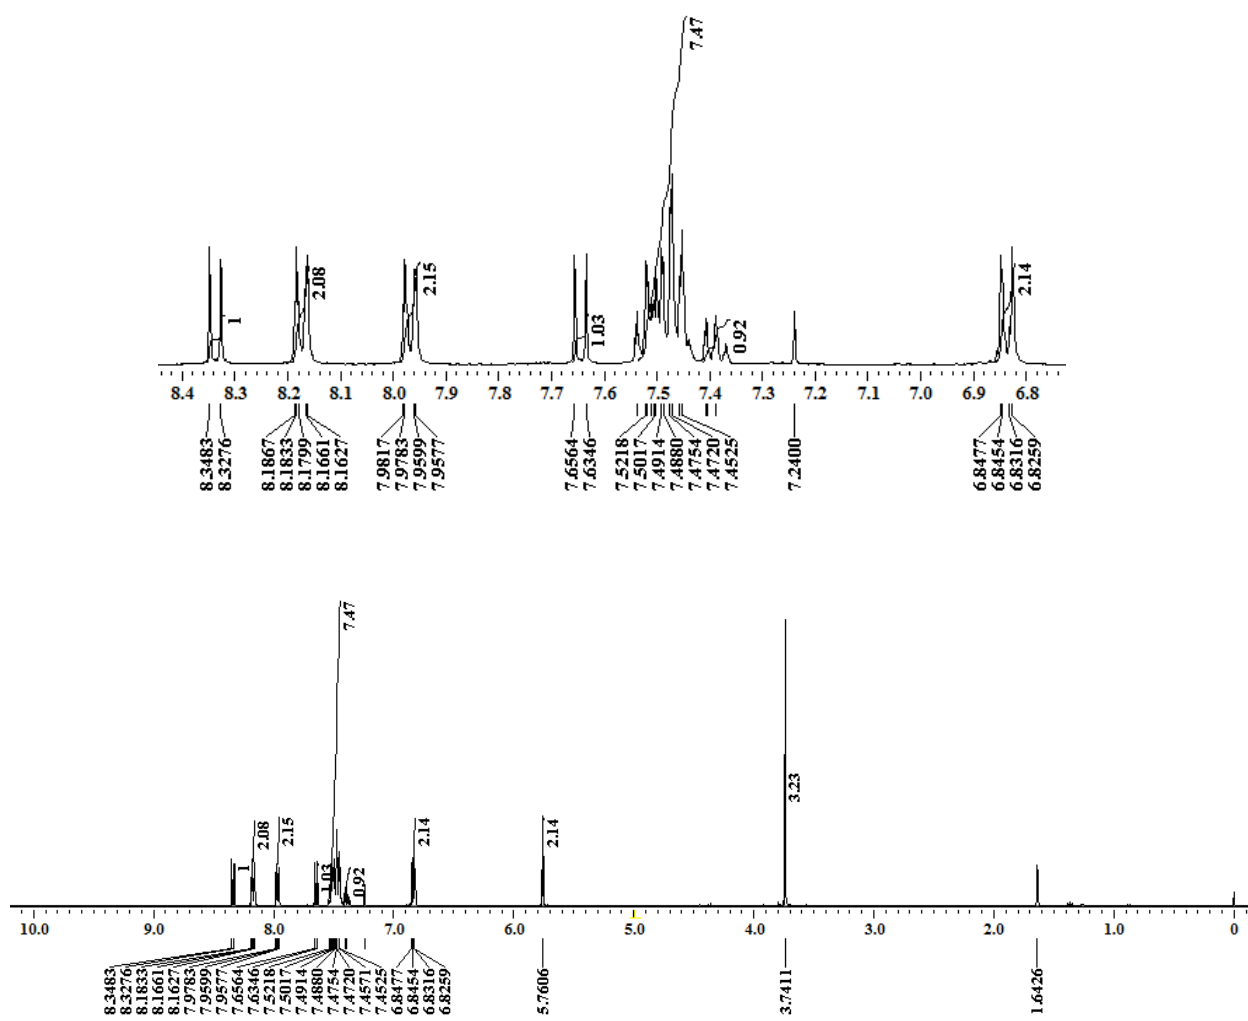



1-(4-methoxybenzyl)-3,6-diphenyl-1*H*-pyrazolo[3,4-*b*]pyridine (**4a**)

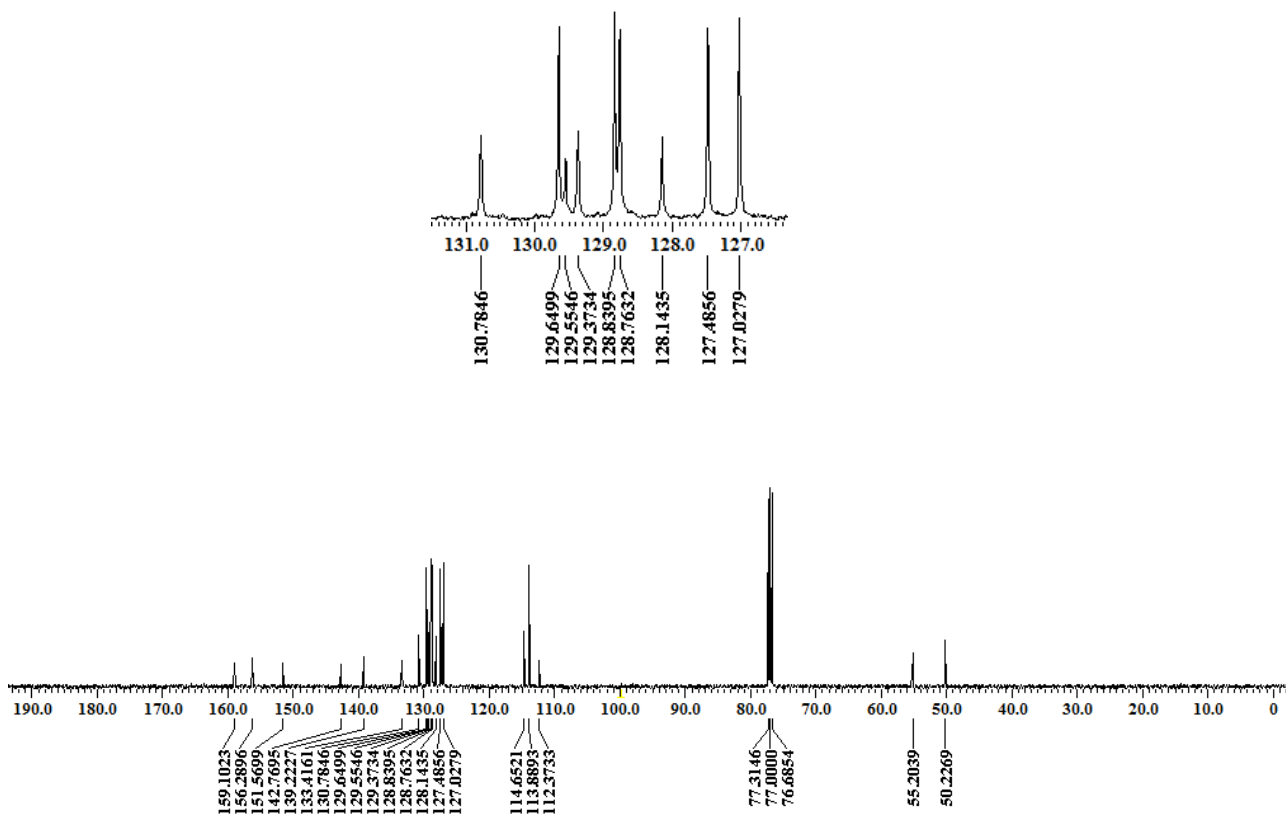



1-(4-methoxybenzyl)-3,6-diphenyl-1H-pyrazolo[3,4-b]pyridine (**4a**)

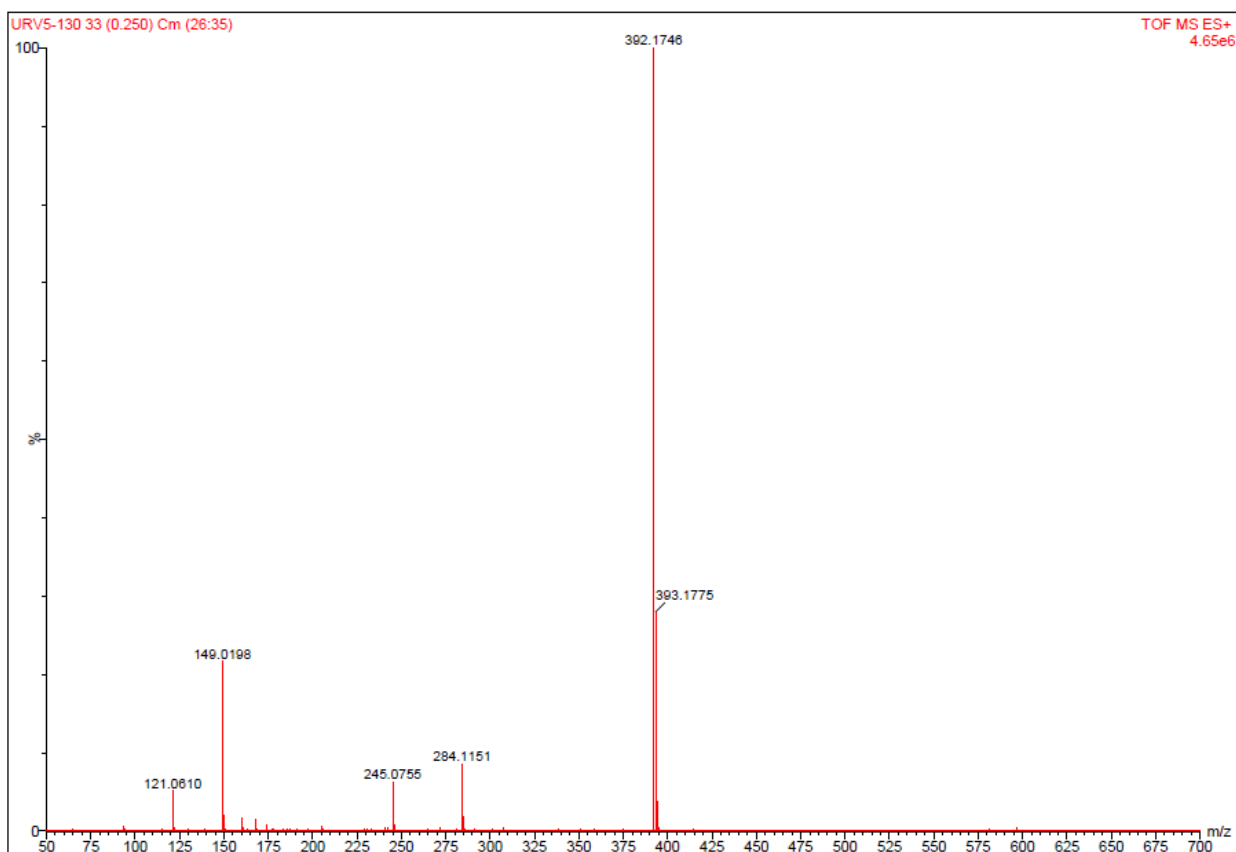

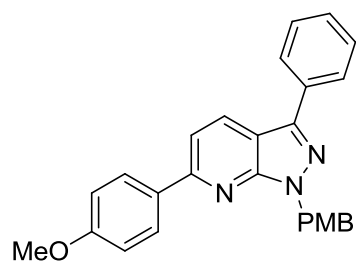

1-(4-methoxybenzyl)-6-(4-methoxyphenyl)-3-phenyl-1*H*-pyrazolo[3,4-*b*]pyridine (**4b**)

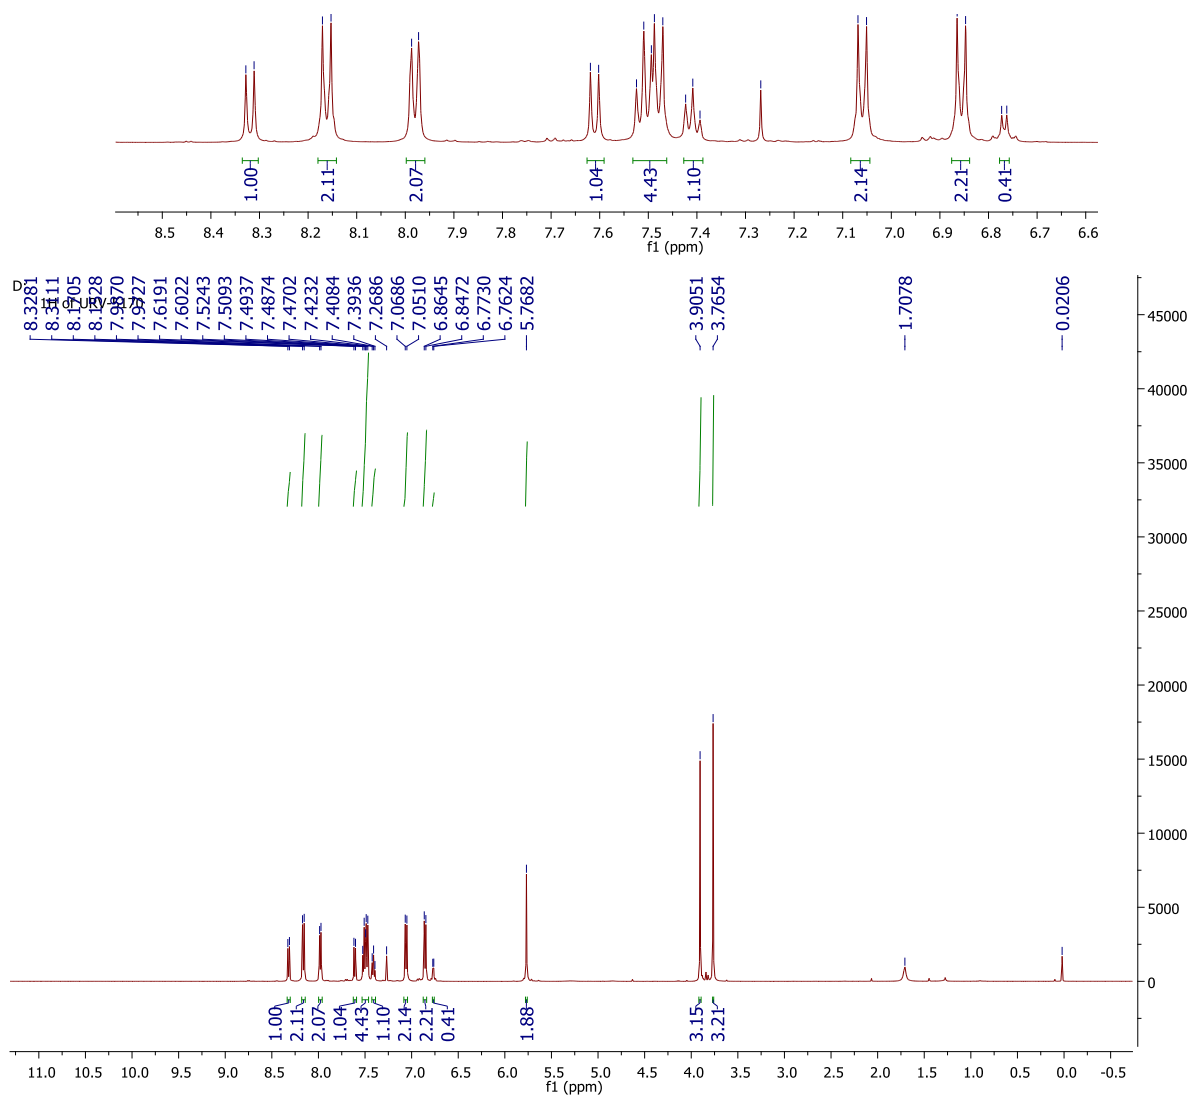

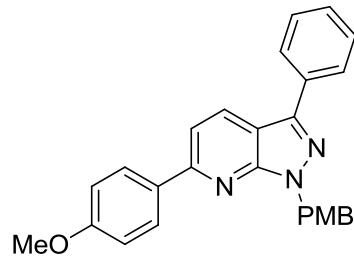

1-(4-methoxybenzyl)-6-(4-methoxyphenyl)-3-phenyl-1H-pyrazolo[3,4-b]pyridine (**4b**)

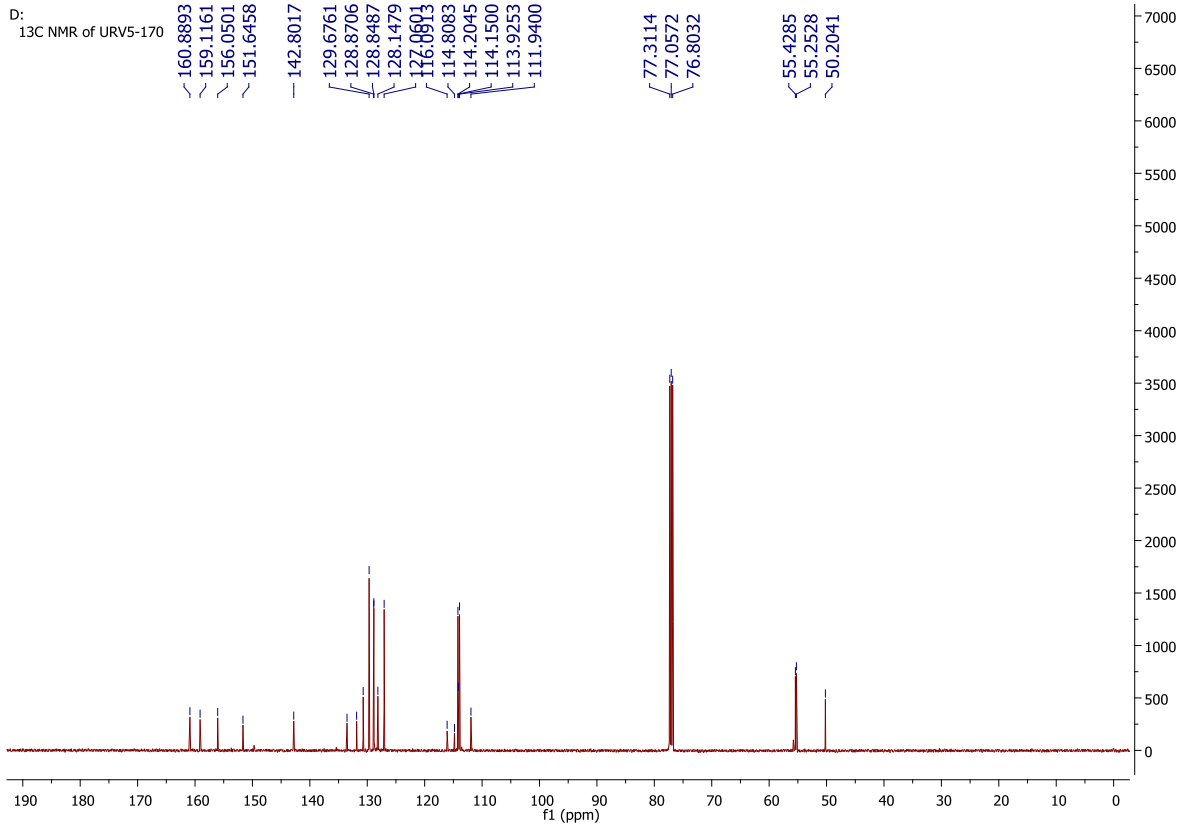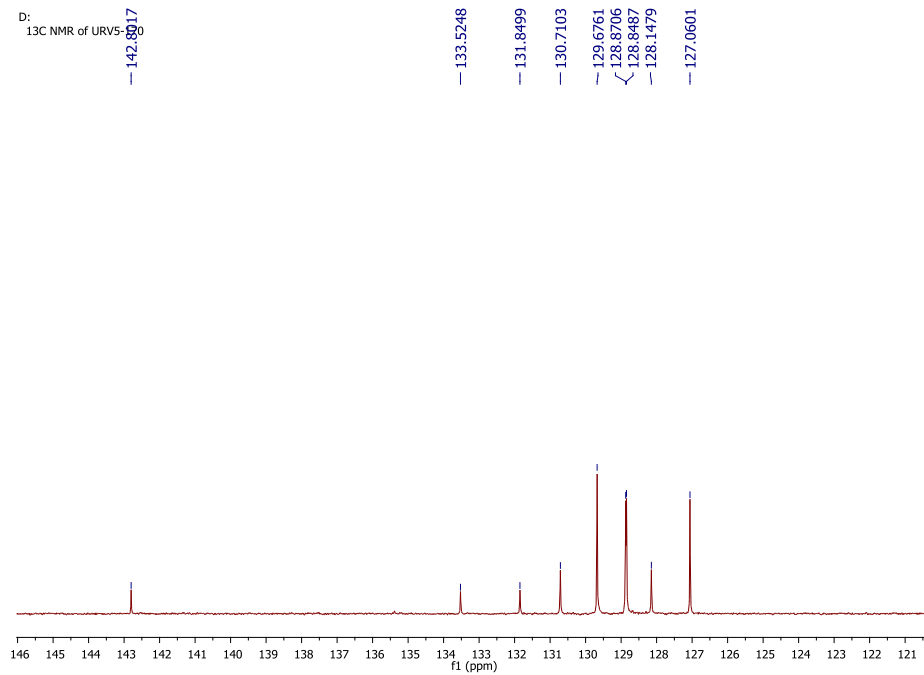





1-(4-methoxybenzyl)-6-(4-methoxyphenyl)-3-phenyl-1H-pyrazolo[3,4-b]pyridine (**4b**)

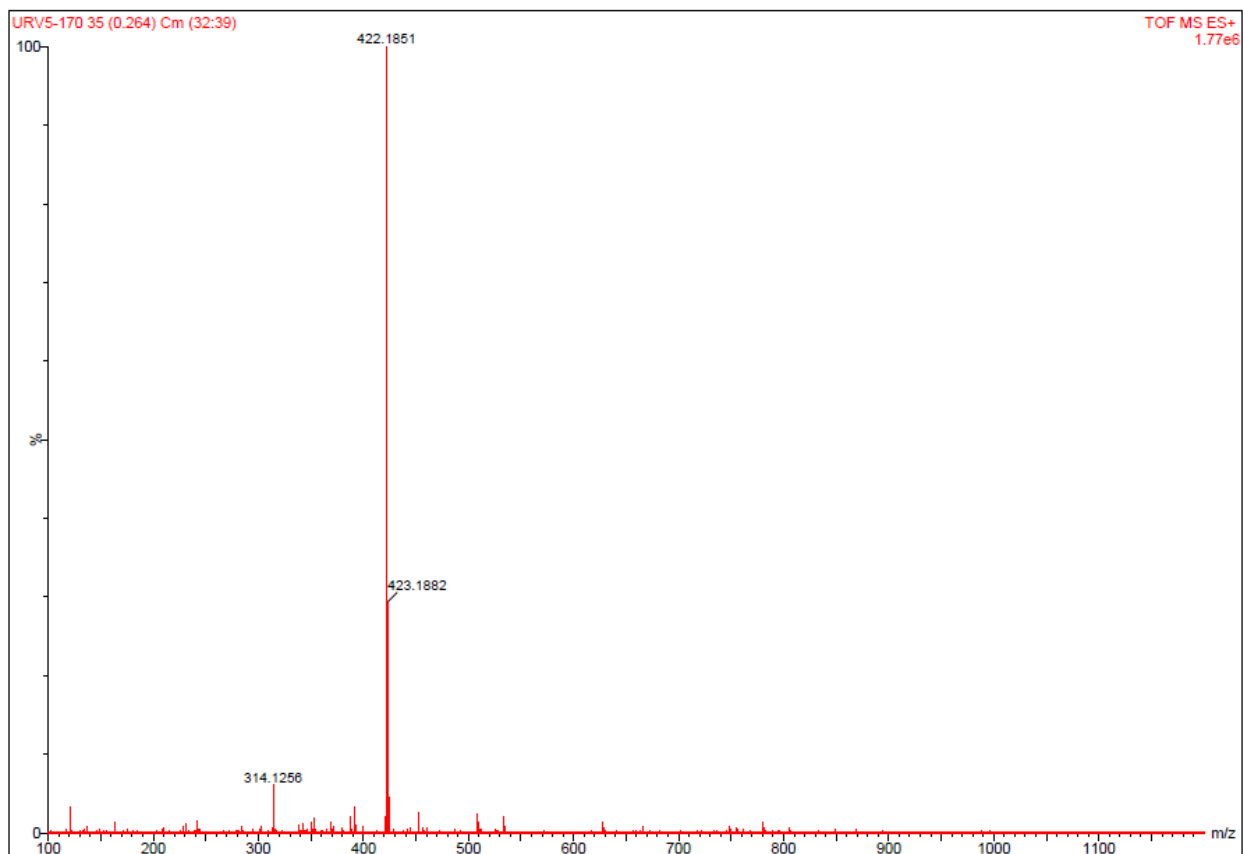

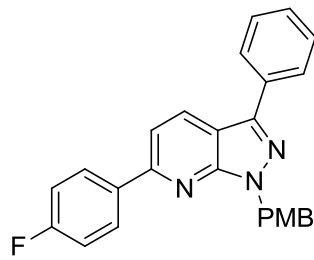

6-(4-fluorophenyl)-1-(4-methoxybenzyl)-3-phenyl-1H-pyrazolo[3,4-b]pyridine (**4c**)

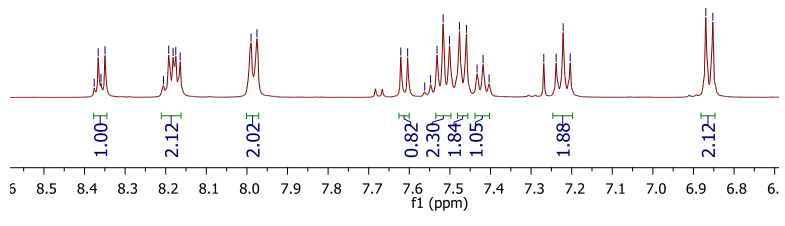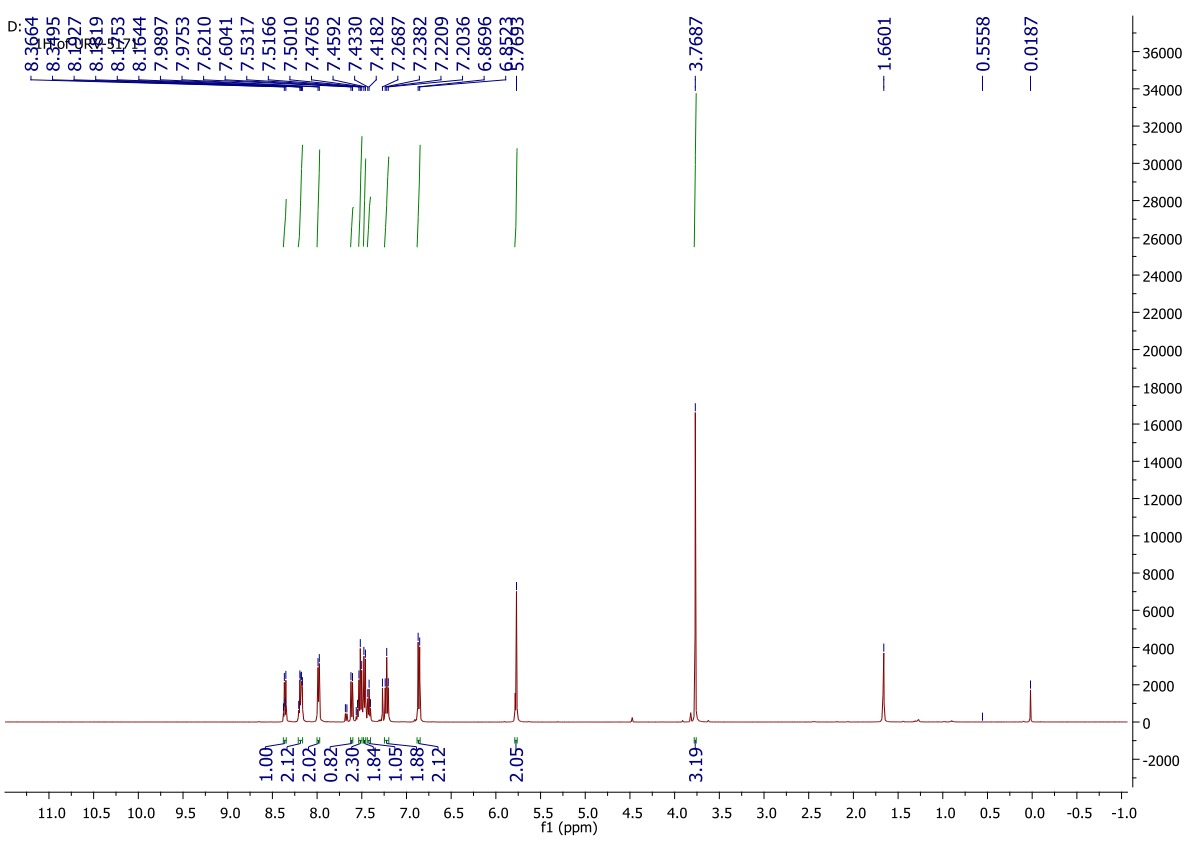

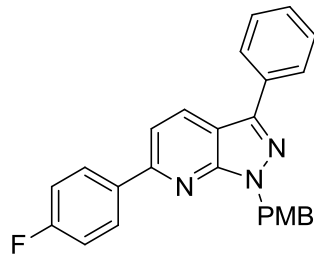

6-(4-fluorophenyl)-1-(4-methoxybenzyl)-3-phenyl-1H-pyrazolo[3,4-*b*]pyridine (**4c**)

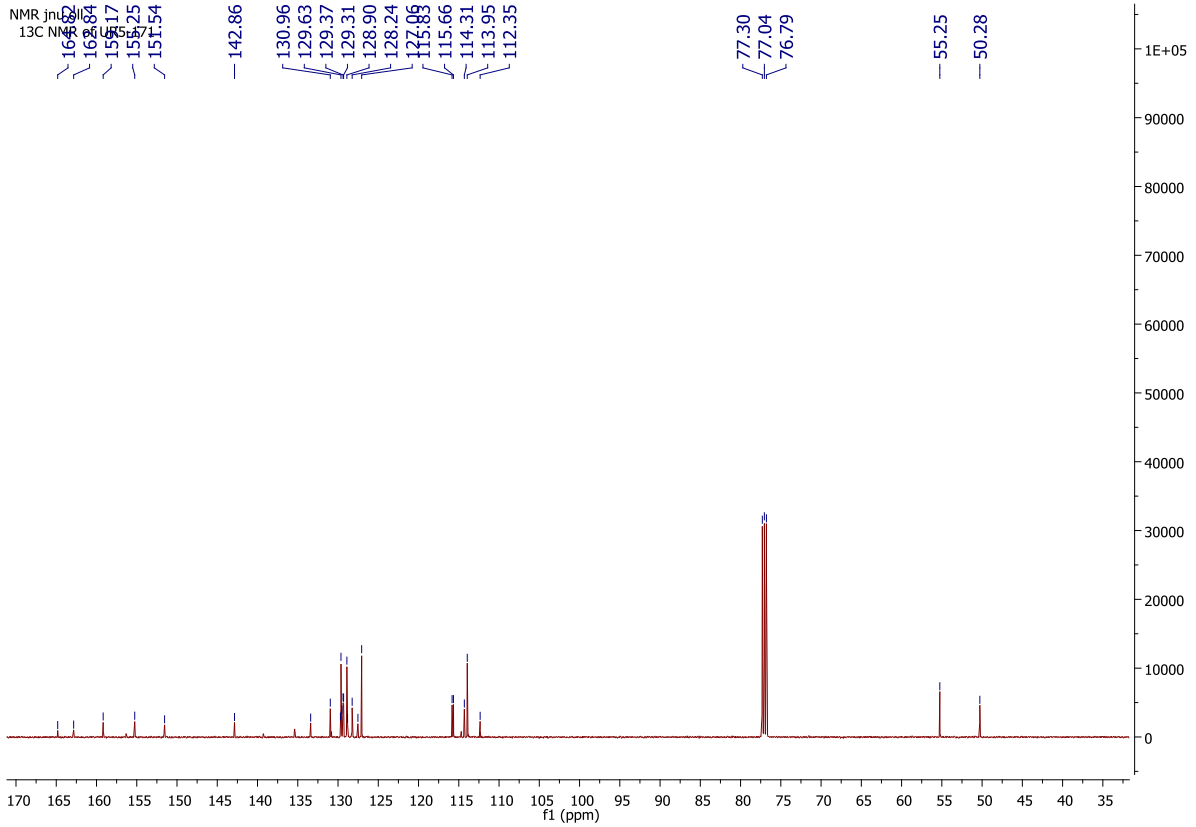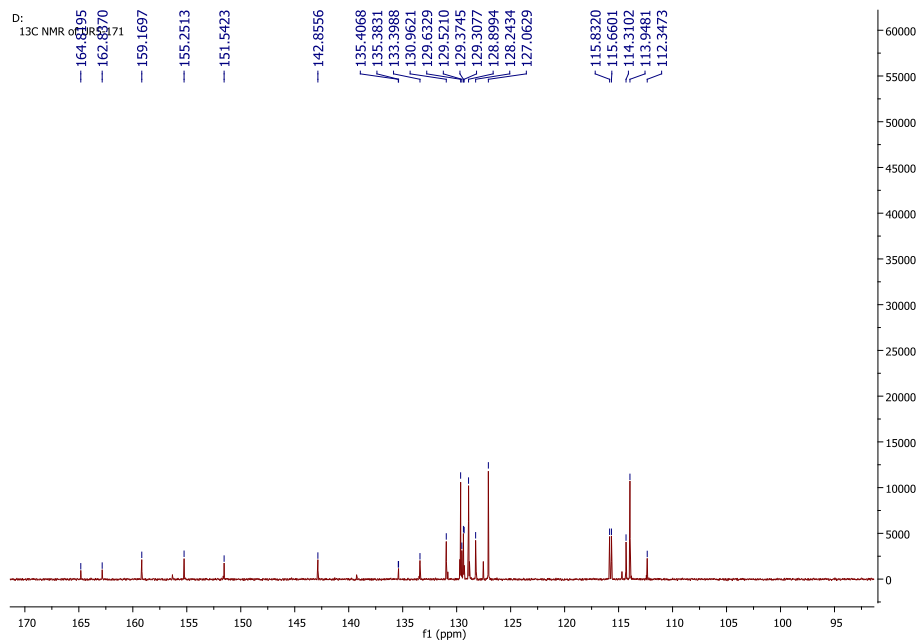

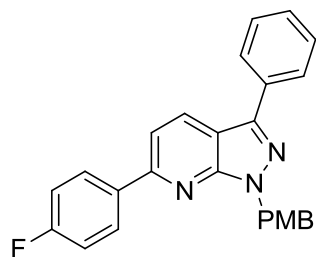

6-(4-fluorophenyl)-1-(4-methoxybenzyl)-3-phenyl-1H-pyrazolo[3,4-b]pyridine (**4c**)

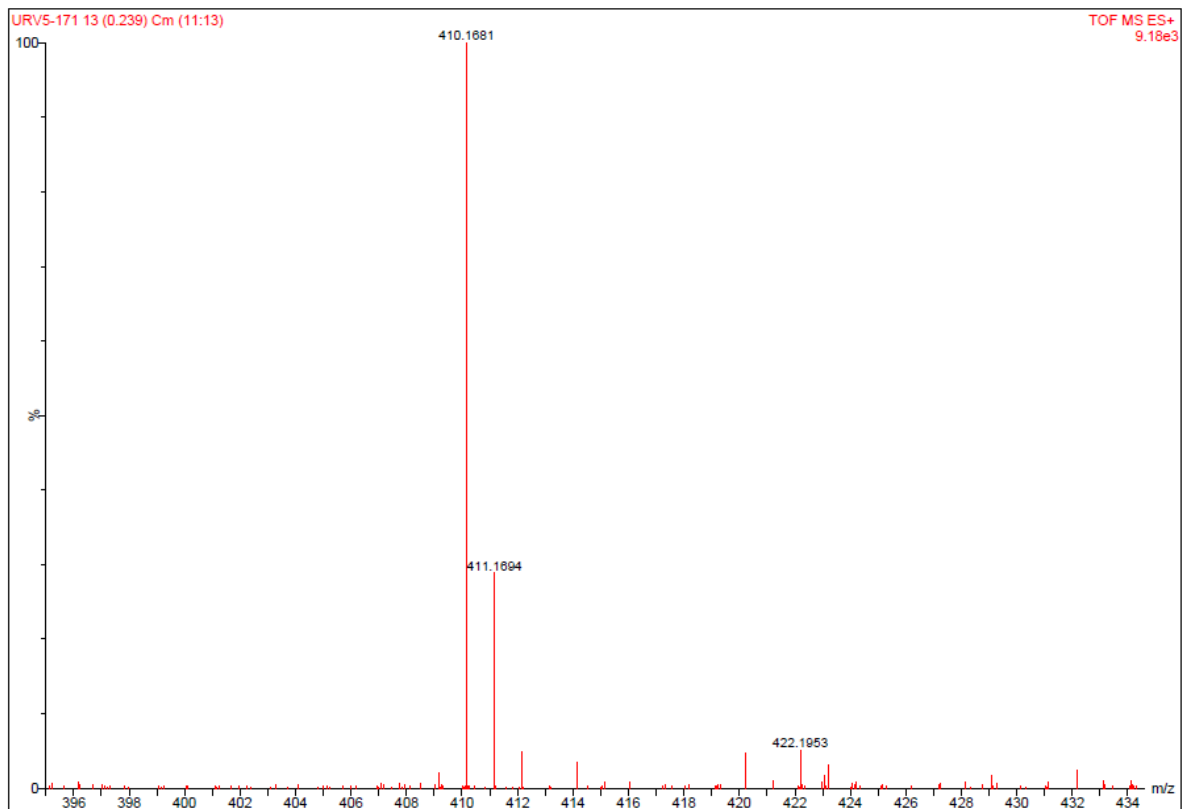

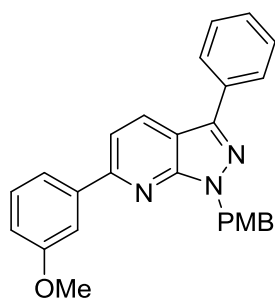

1-(4-methoxybenzyl)-6-(3-methoxyphenyl)-3-phenyl-1*H*-pyrazolo[3,4-*b*]pyridine (**4d**)

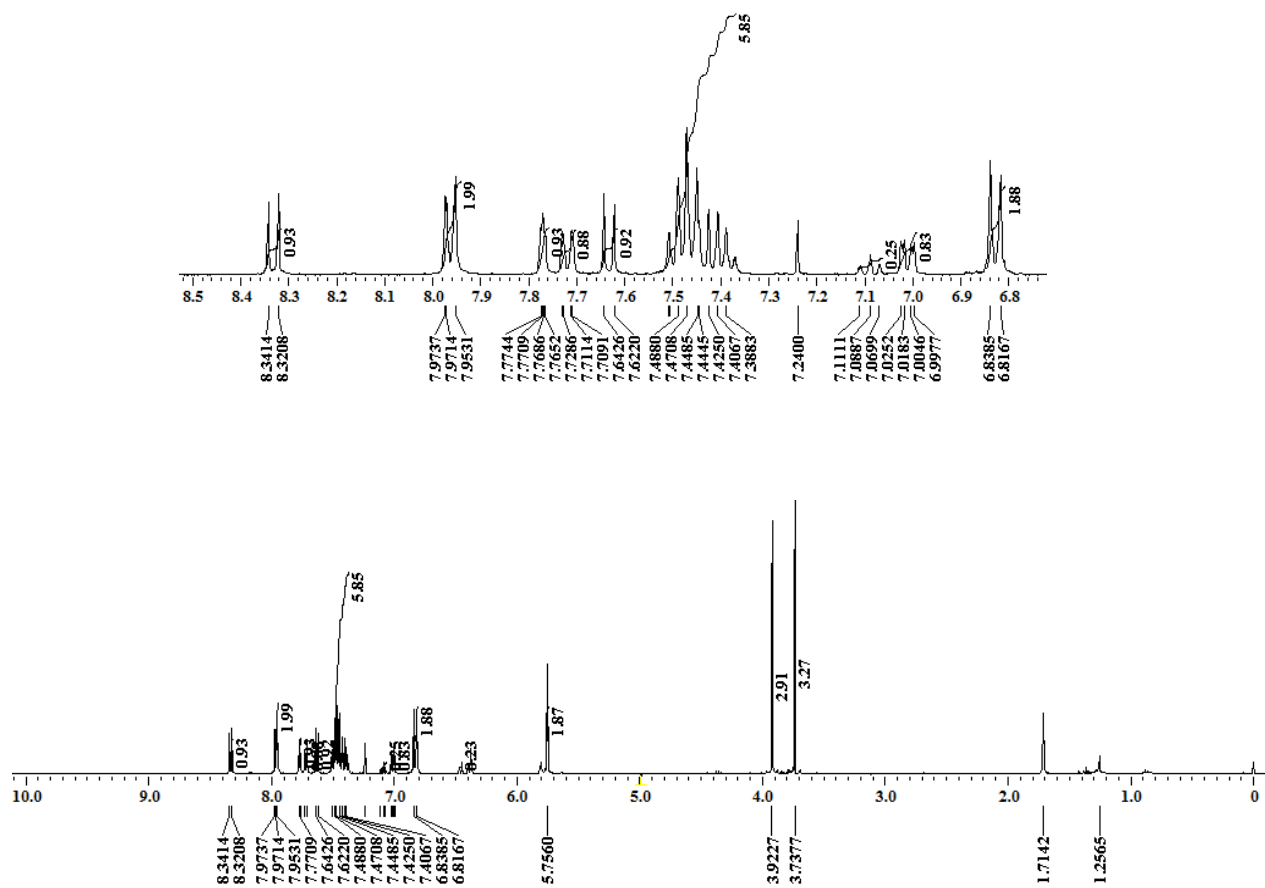

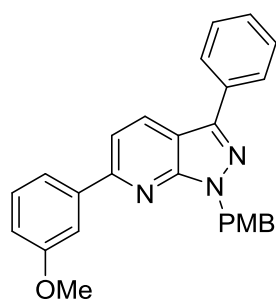

1-(4-methoxybenzyl)-6-(3-methoxyphenyl)-3-phenyl-1*H*-pyrazolo[3,4-*b*]pyridine (**4d**)

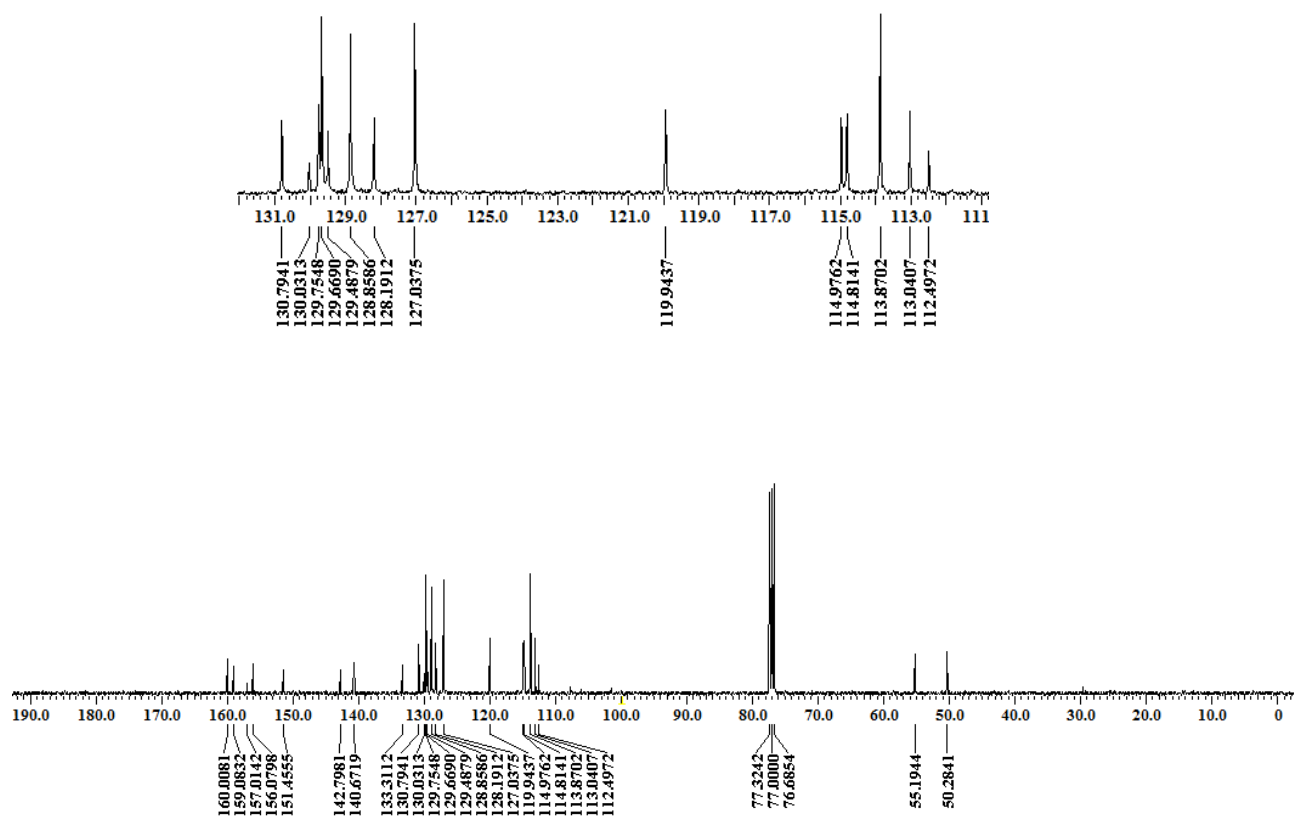

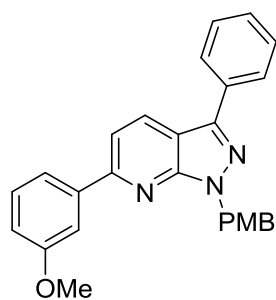

1-(4-methoxybenzyl)-6-(3-methoxyphenyl)-3-phenyl-1H-pyrazolo[3,4-b]pyridine (**4d**)

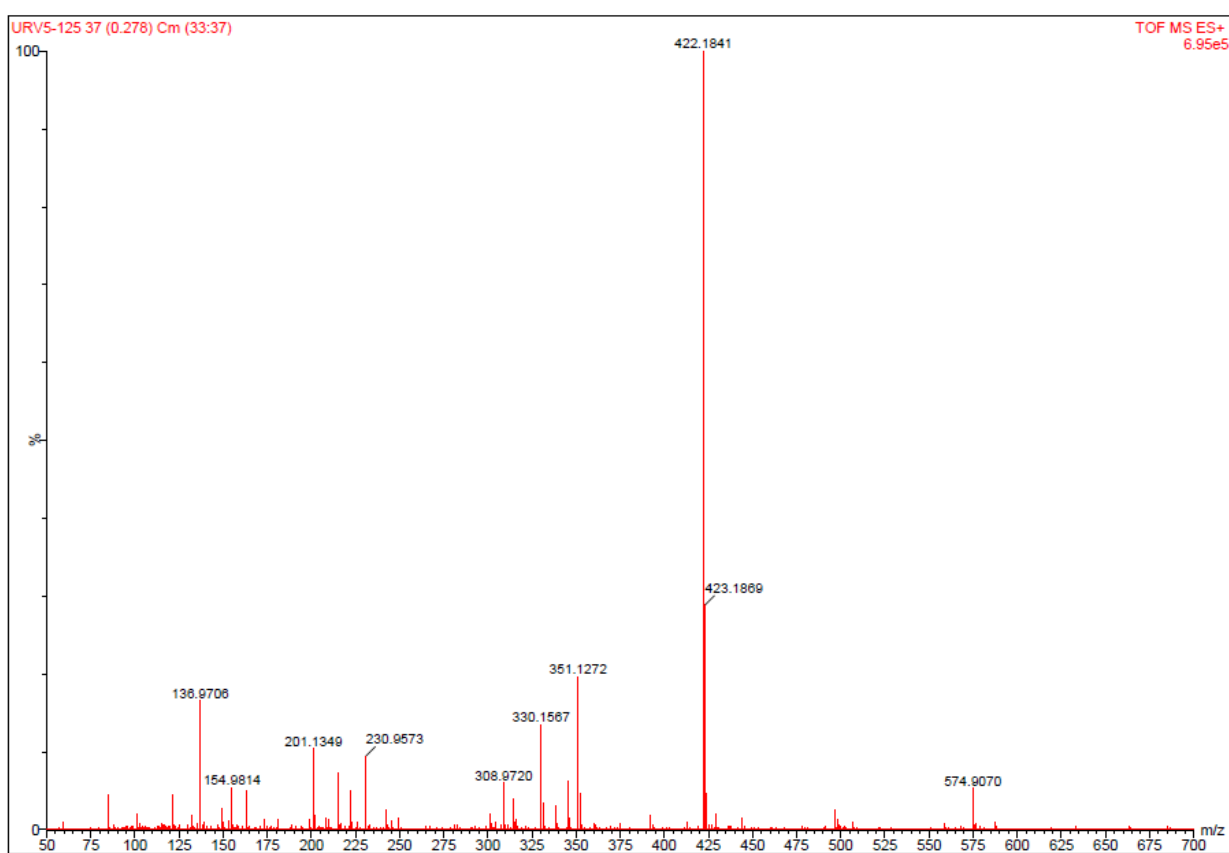

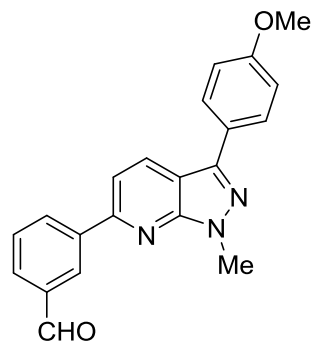

3-(3-(4-methoxyphenyl)-1-methyl-1H-pyrazolo[3,4-b]pyridin-6-yl)benzaldehyde (**4e**)

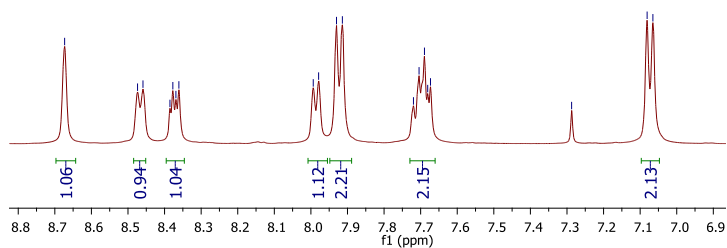

D:  
1H URV5-196BB

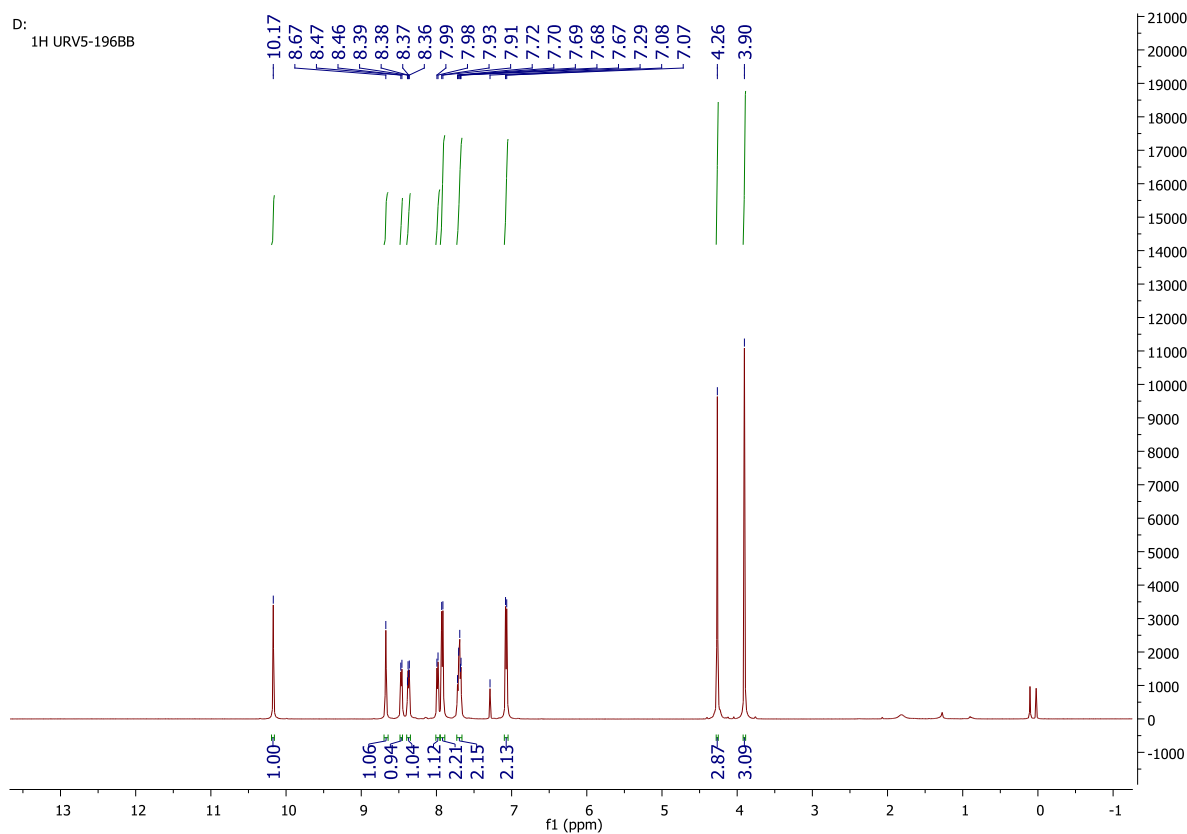



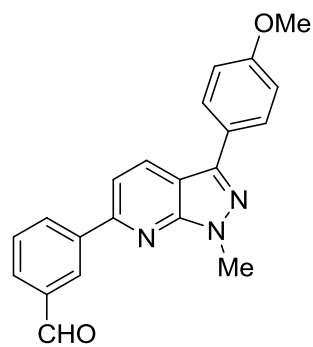

3-(3-(4-methoxyphenyl)-1-methyl-1*H*-pyrazolo[3,4-*b*]pyridin-6-yl)benzaldehyde(**4e**)

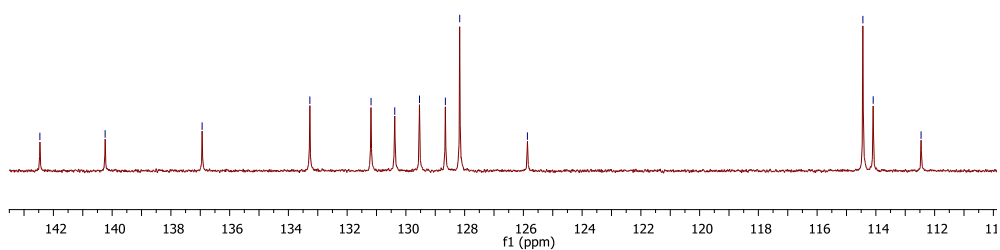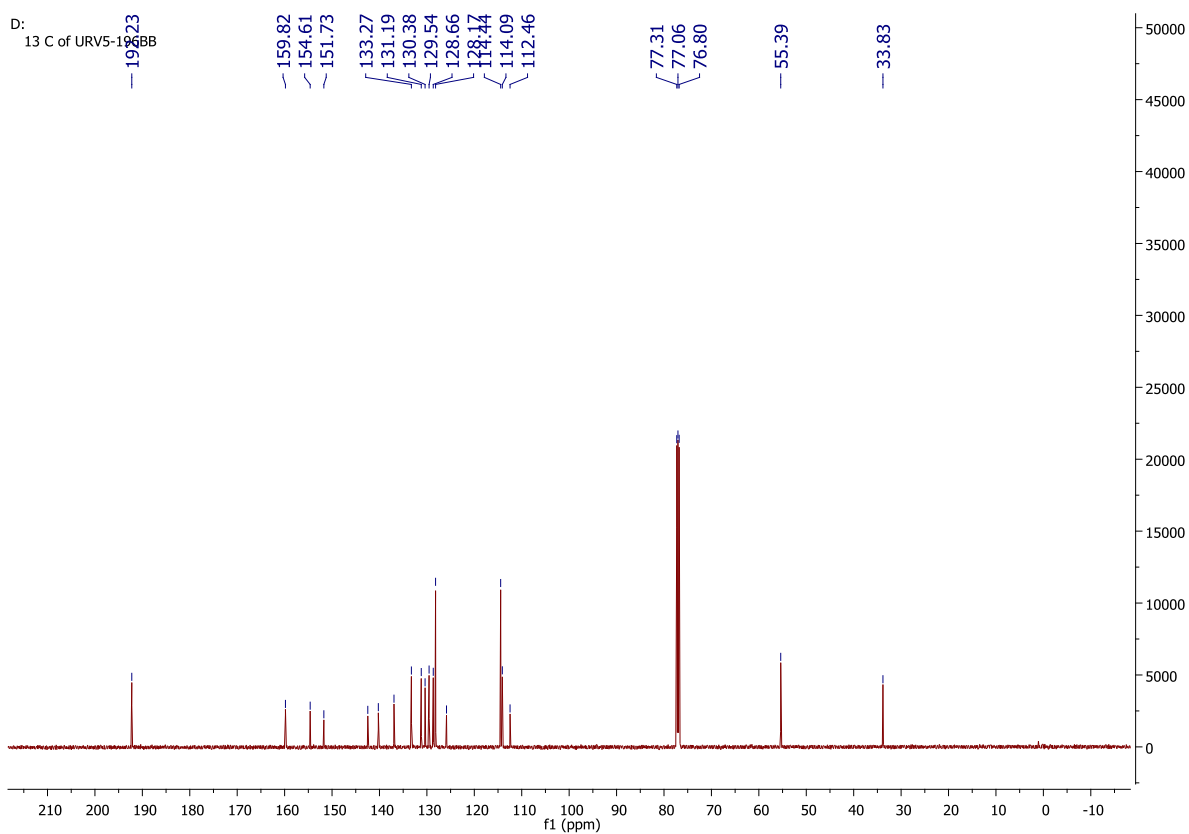

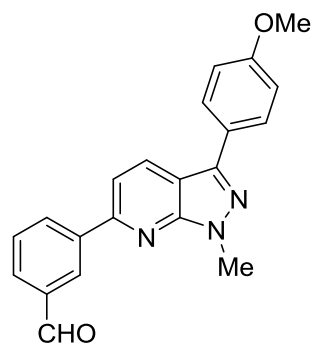

3-(3-(4-methoxyphenyl)-1-methyl-1H-pyrazolo[3,4-b]pyridin-6-yl)benzaldehyde(4e)

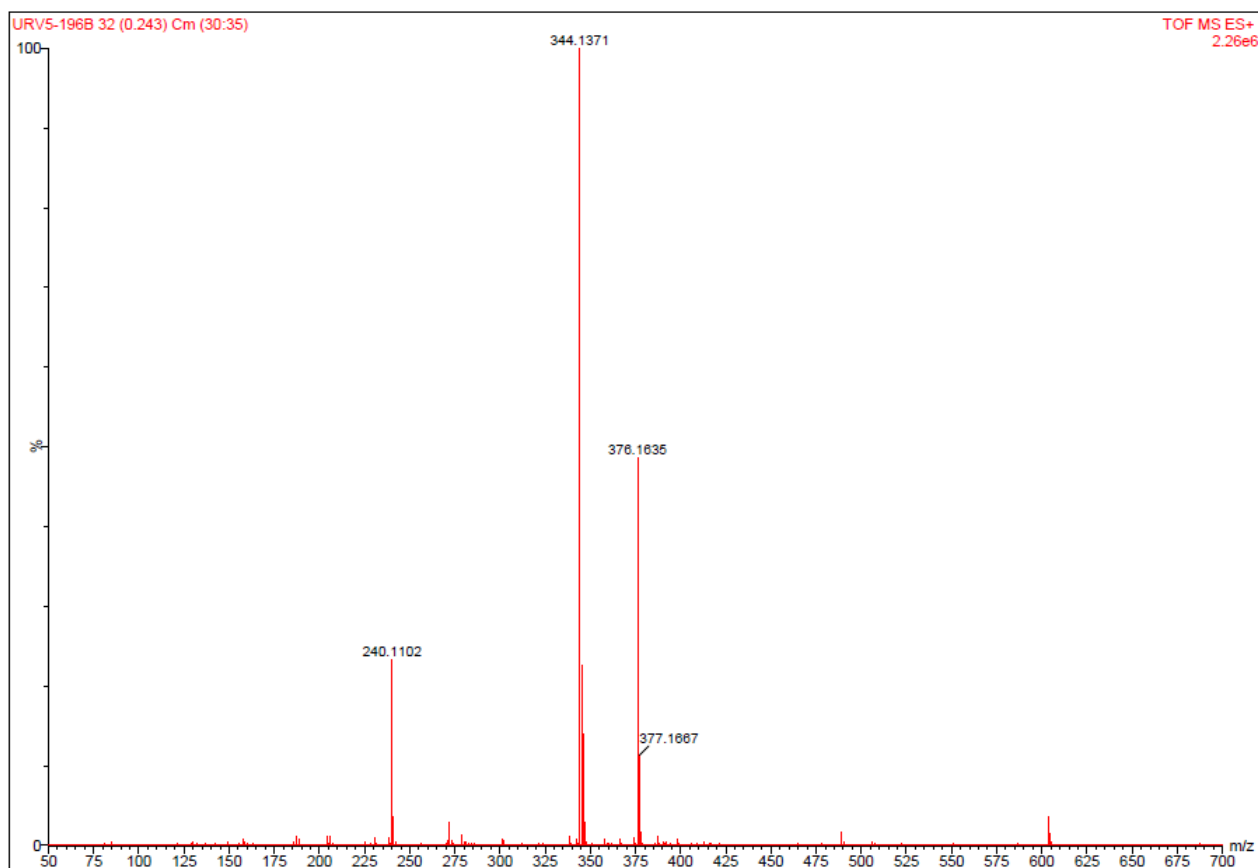

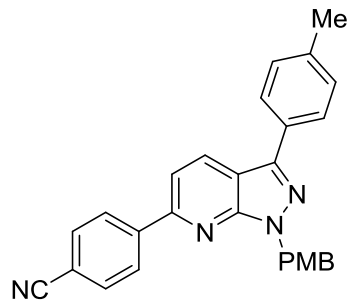

4-(1-(4-methoxybenzyl)-3-(*p*-tolyl)-1*H*-pyrazolo[3,4-*b*]pyridin-6-yl)benzonitrile (**4f**)

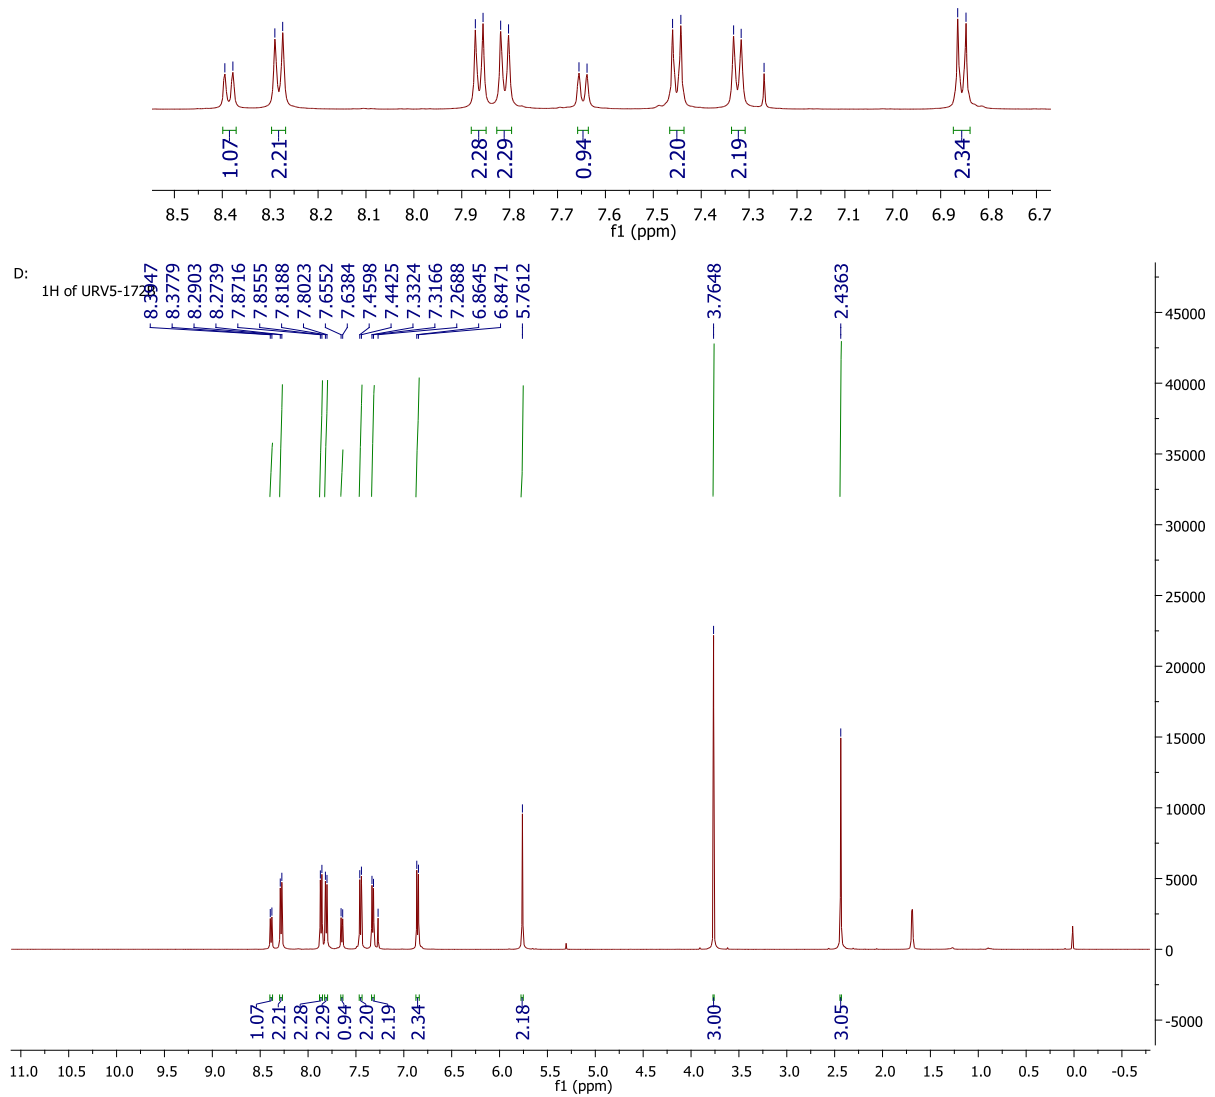

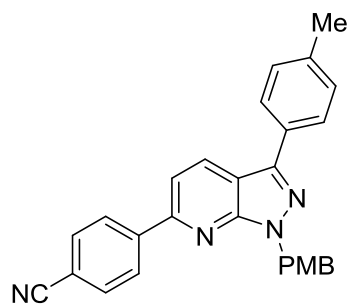

4-(1-(4-methoxybenzyl)-3-(*p*-tolyl)-1*H*-pyrazolo[3,4-*b*]pyridin-6-yl)benzonitrile (**4f**)

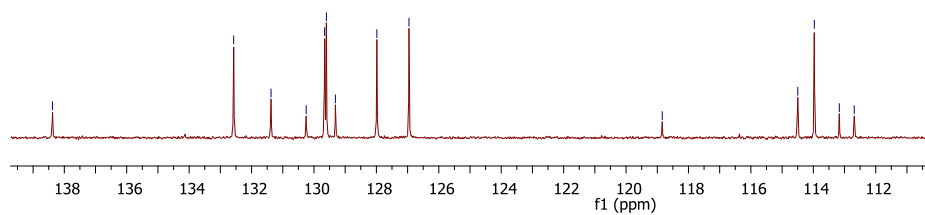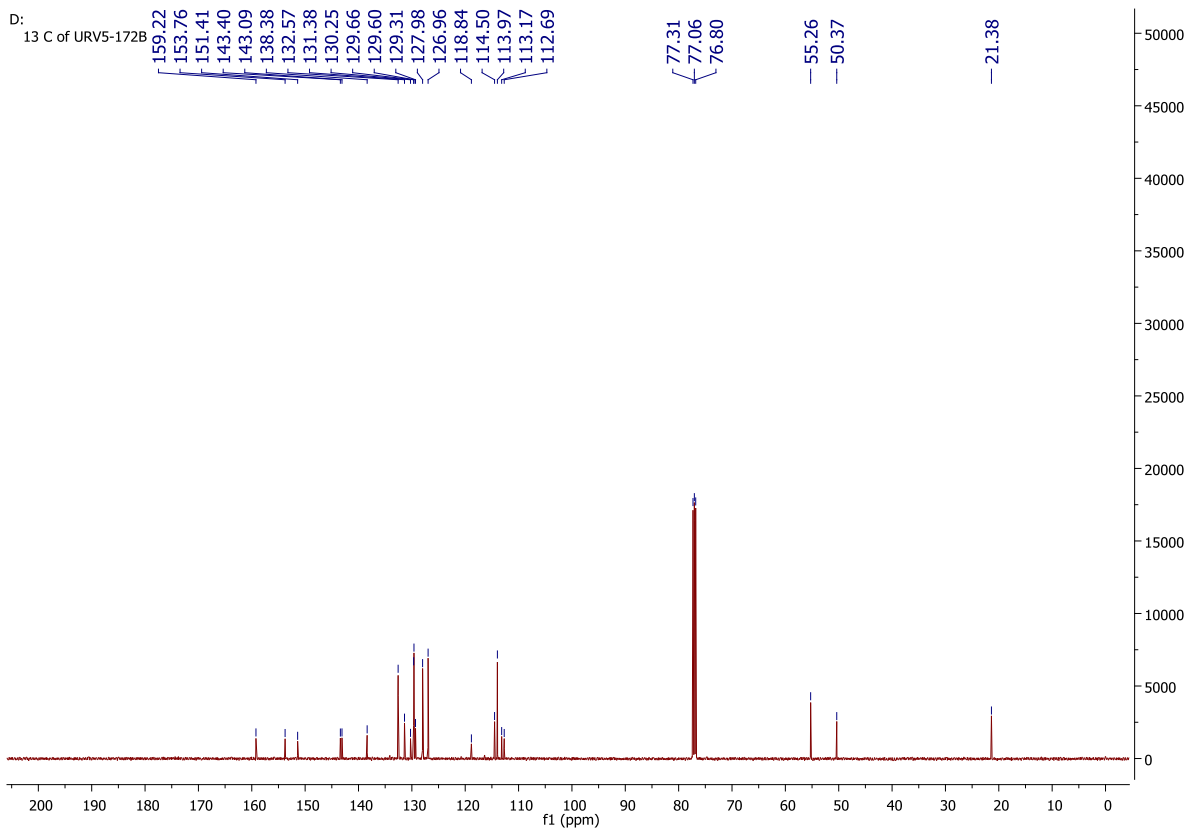

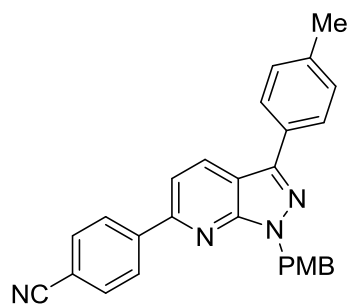

4-(1-(4-methoxybenzyl)-3-(*p*-tolyl)-1*H*-pyrazolo[3,4-*b*]pyridin-6-yl)benzonitrile (**4f**)

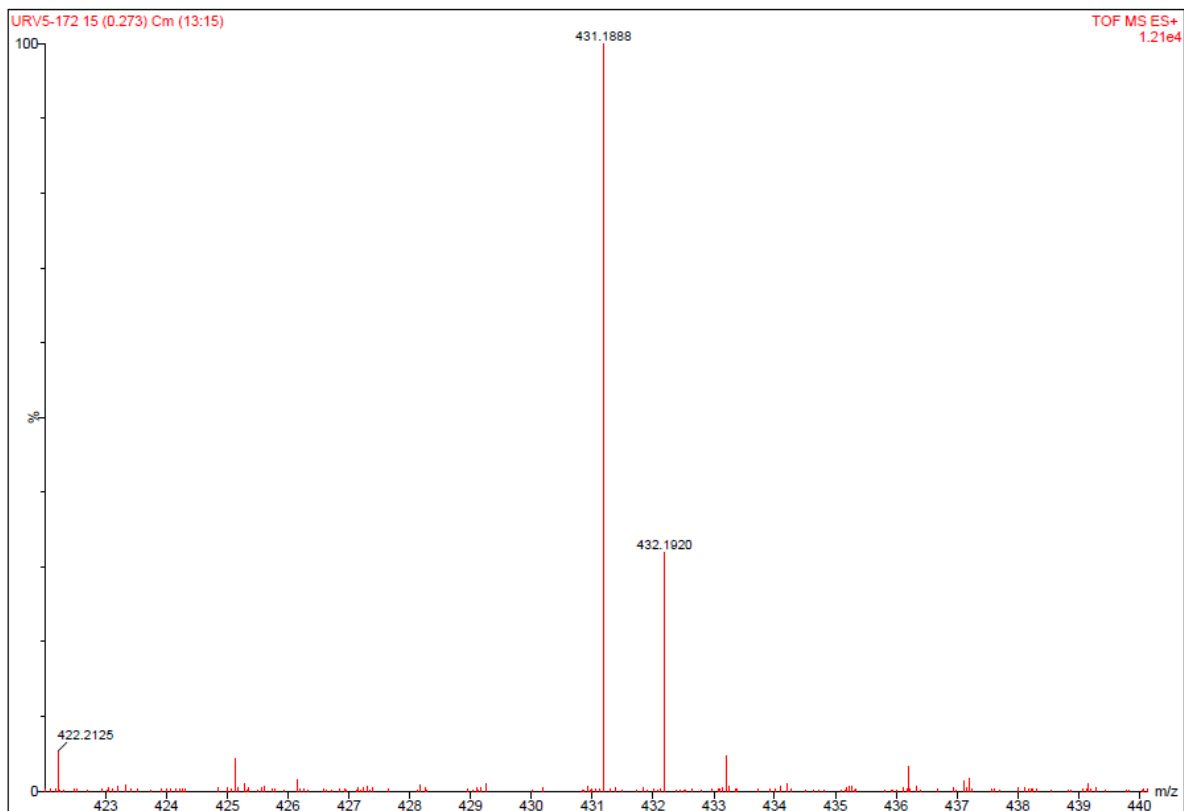

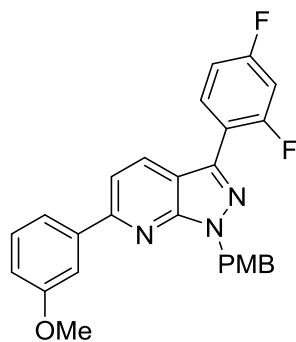

3-(2,4-difluorophenyl)-1-(4-methoxybenzyl)-6-(3-methoxyphenyl)-1H-pyrazolo[3,4-b]pyridine (**4g**)

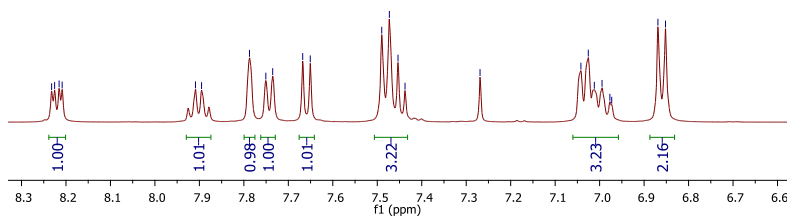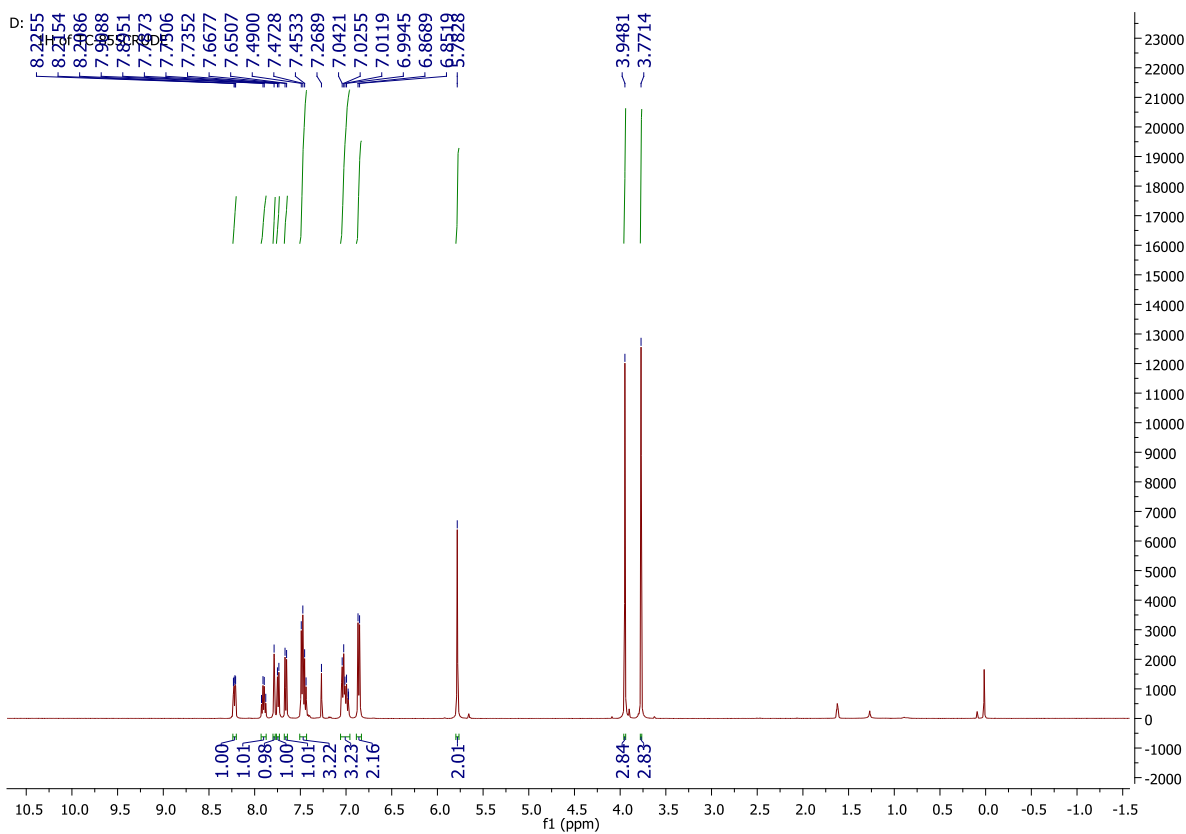

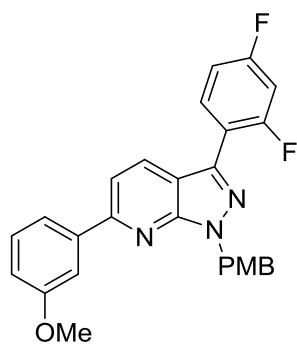

3-(2,4-difluorophenyl)-1-(4-methoxybenzyl)-6-(3-methoxyphenyl)-1H-pyrazolo[3,4-b]pyridine (**4g**)

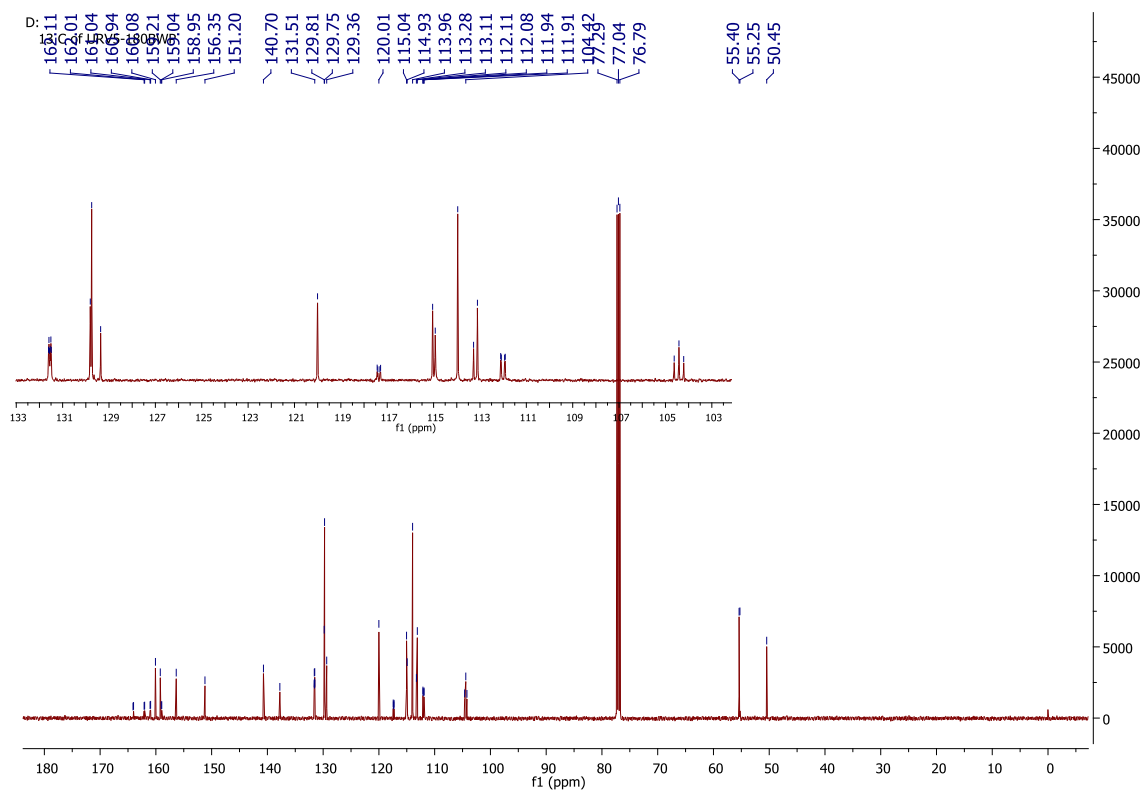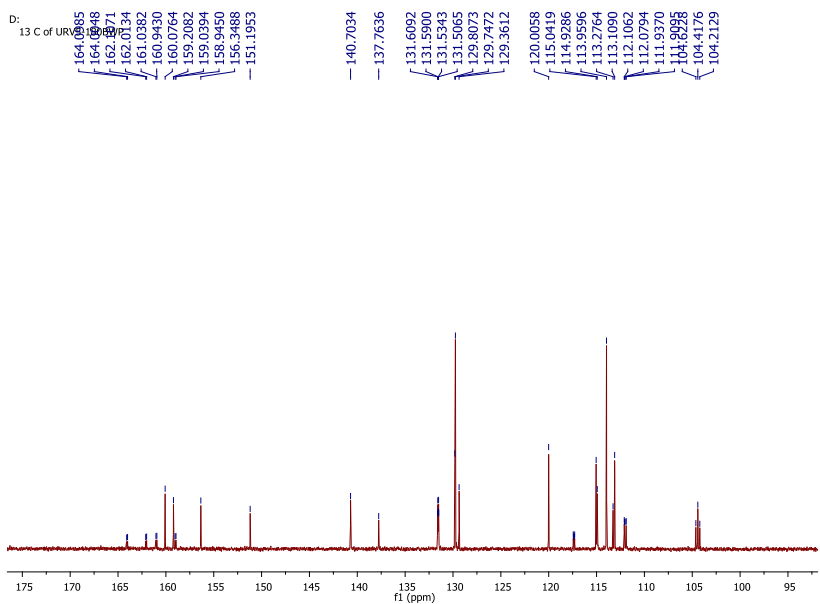



3-(2,4-difluorophenyl)-1-(4-methoxybenzyl)-6-(3-methoxyphenyl)-1*H*-pyrazolo[3,4-*b*]pyridine (**4g**)

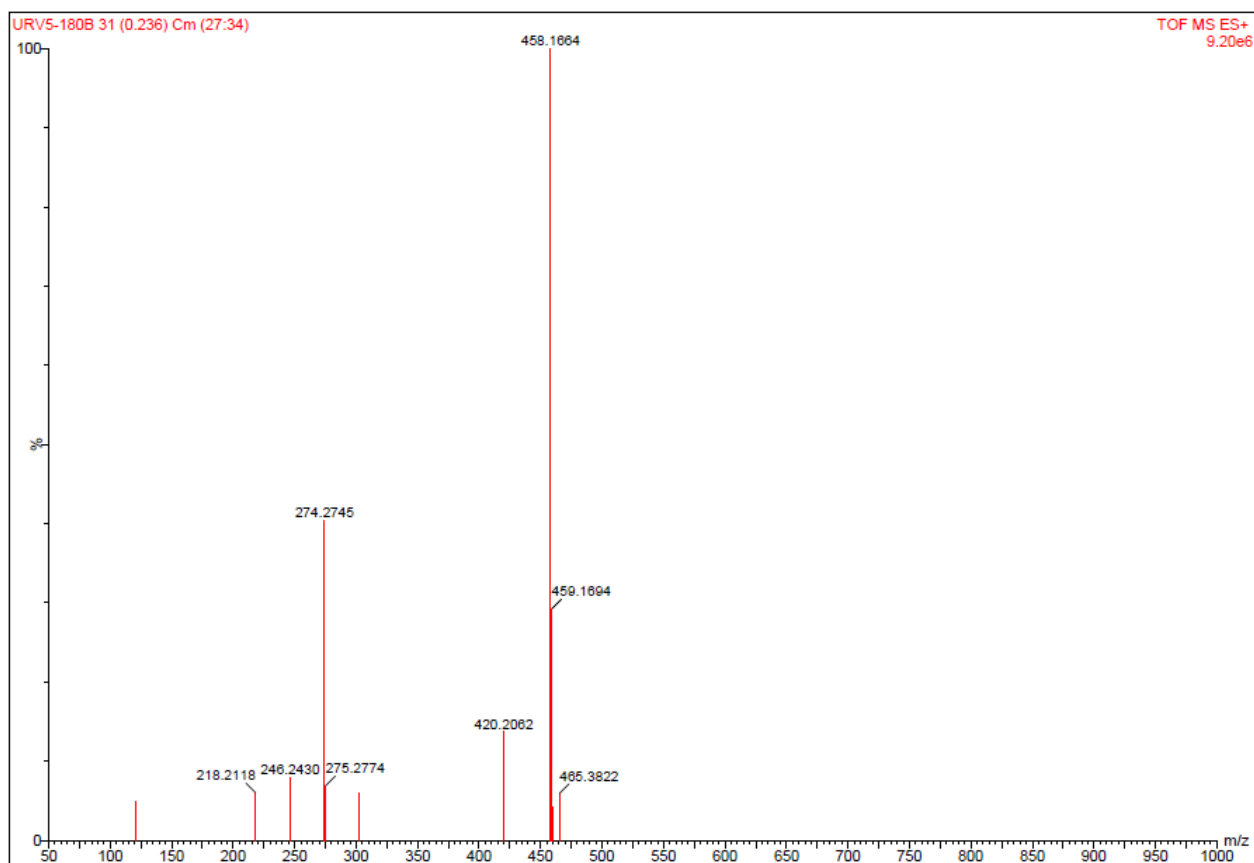



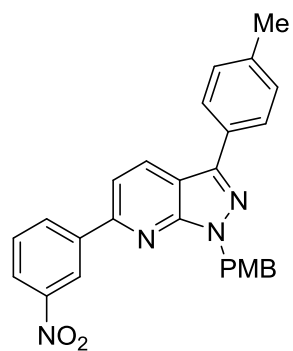

1-(4-methoxybenzyl)-6-(3-nitrophenyl)-3-(*p*-tolyl)-1*H*-pyrazolo[3,4-*b*]pyridine (**4h**)

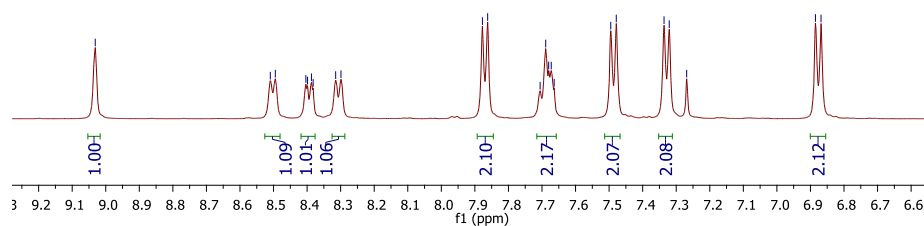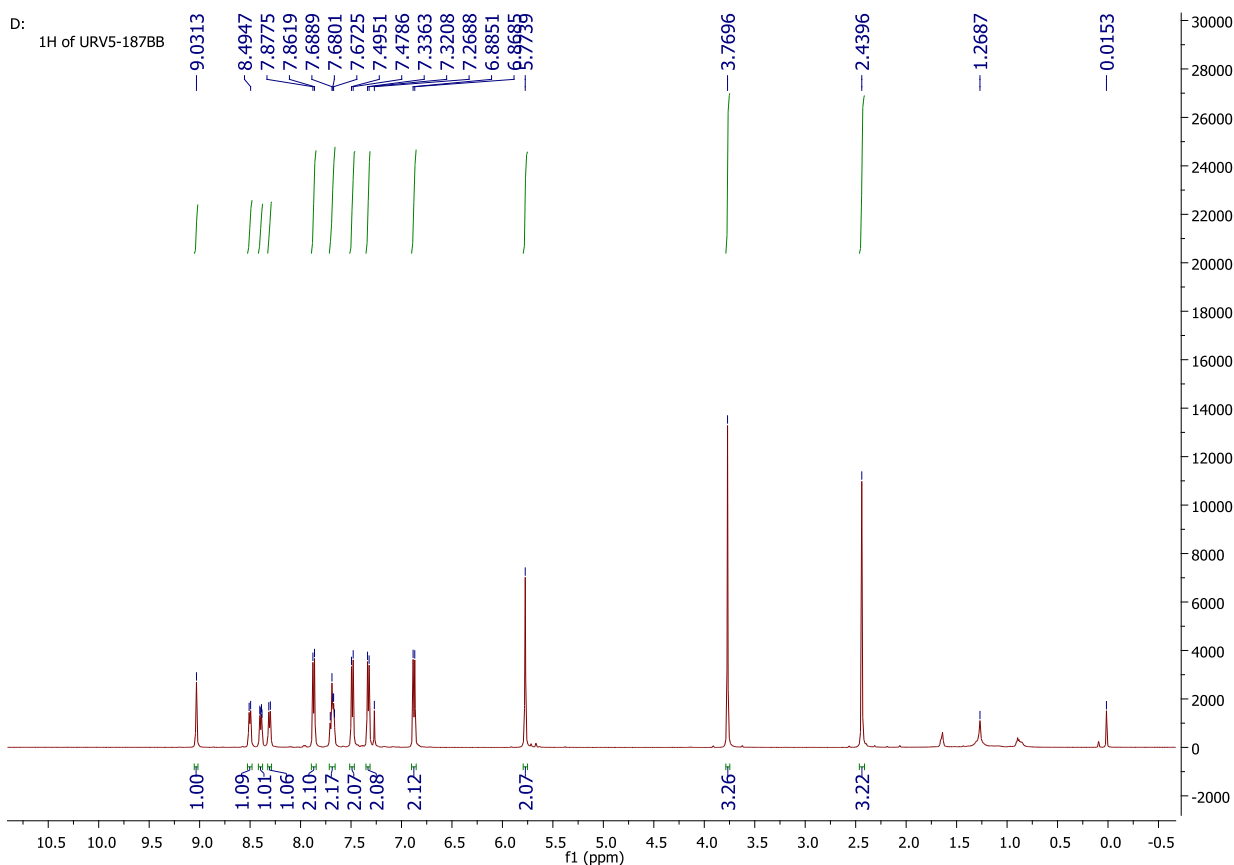



1-(4-methoxybenzyl)-6-(3-nitrophenyl)-3-(*p*-tolyl)-1*H*-pyrazolo[3,4-*b*]pyridine (**4h**)

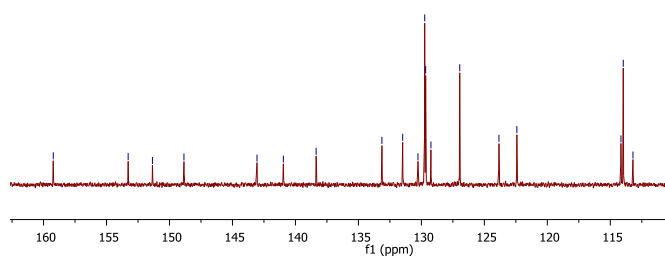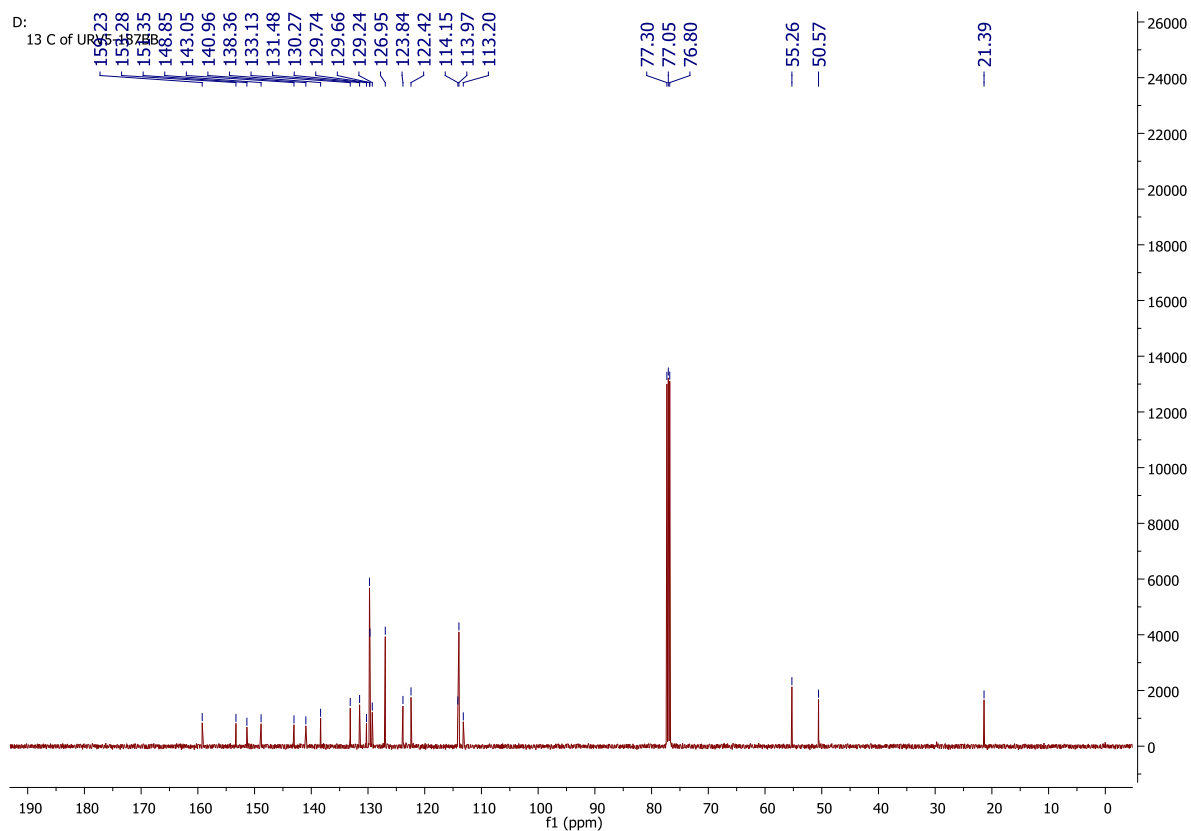



1-(4-methoxybenzyl)-6-(3-nitrophenyl)-3-(p-tolyl)-1H-pyrazolo[3,4-b]pyridine (**4h**)

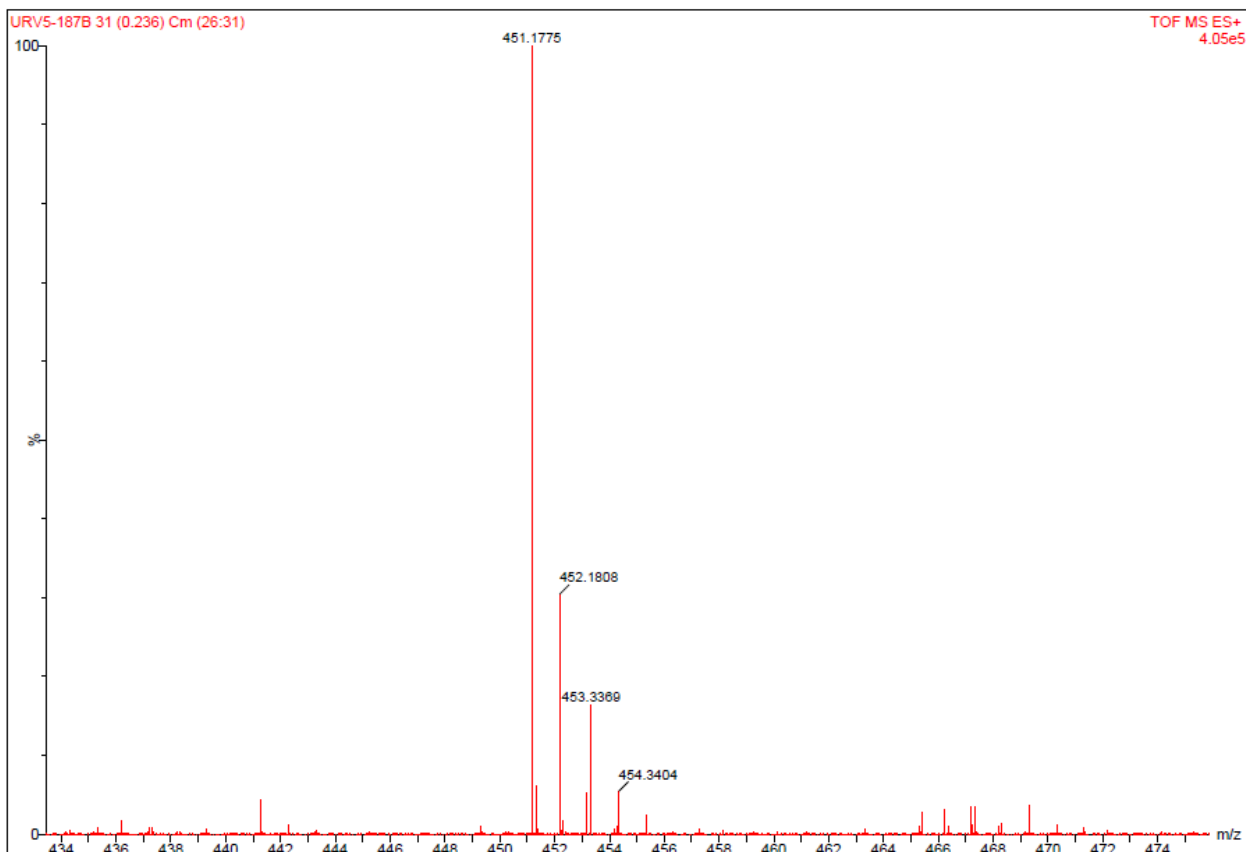

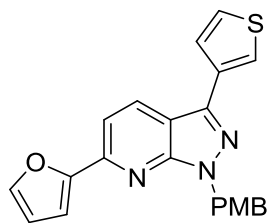

6-(furan-2-yl)-1-(4-methoxybenzyl)-3-(thiophen-3-yl)-1H-pyrazolo[3,4-b]pyridine (**4i**)

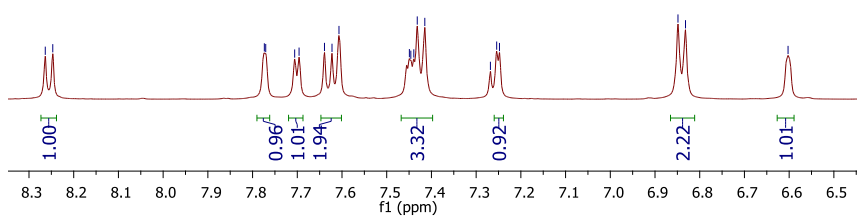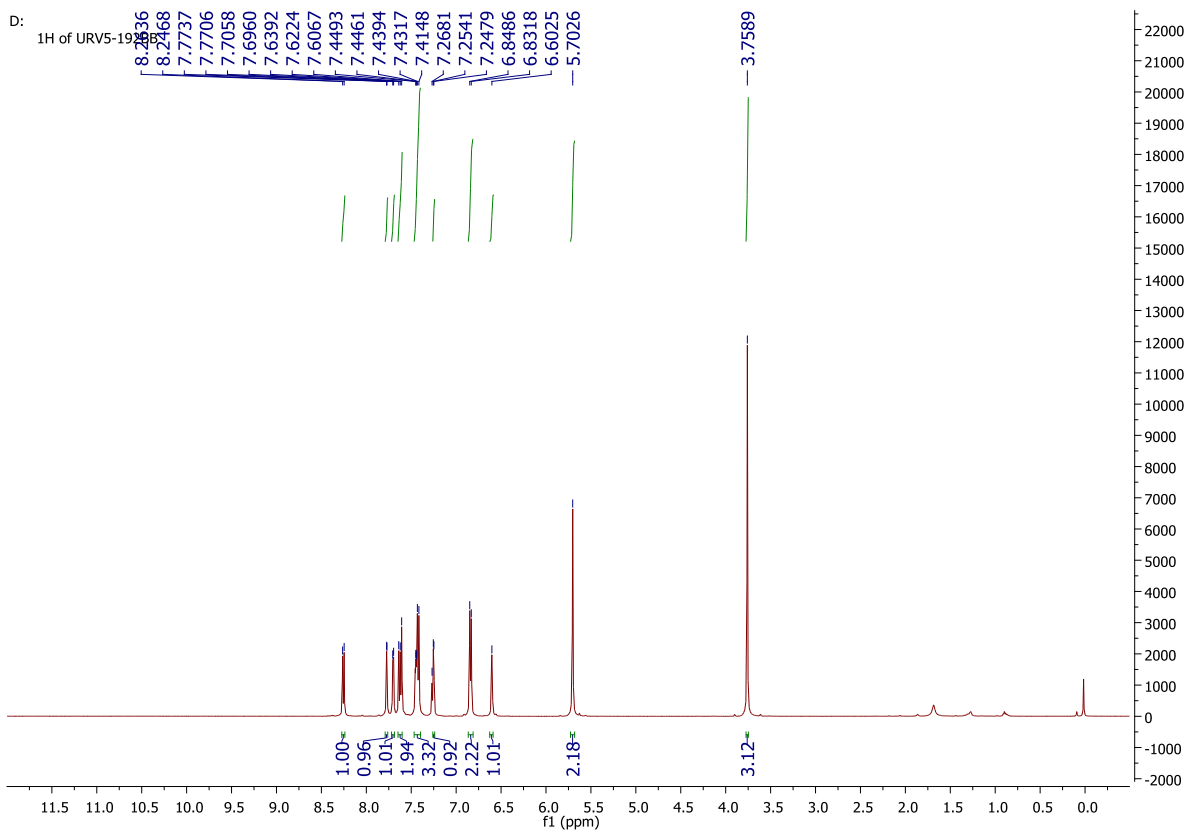

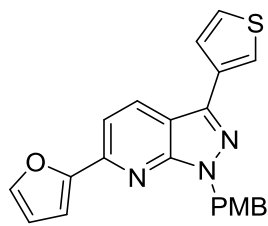

6-(furan-2-yl)-1-(4-methoxybenzyl)-3-(thiophen-3-yl)-1*H*-pyrazolo[3,4-*b*]pyridine (**4i**)

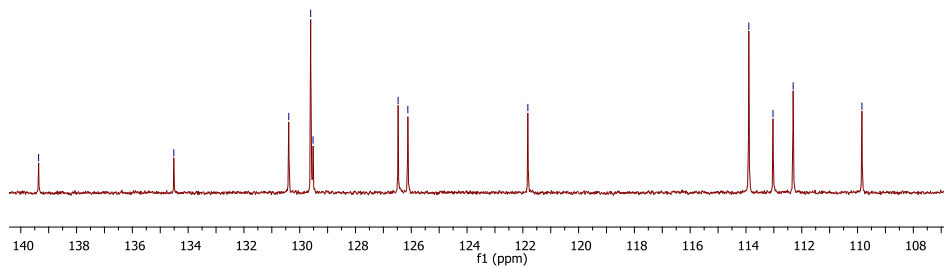

D:  
13 C of URV5-192BB

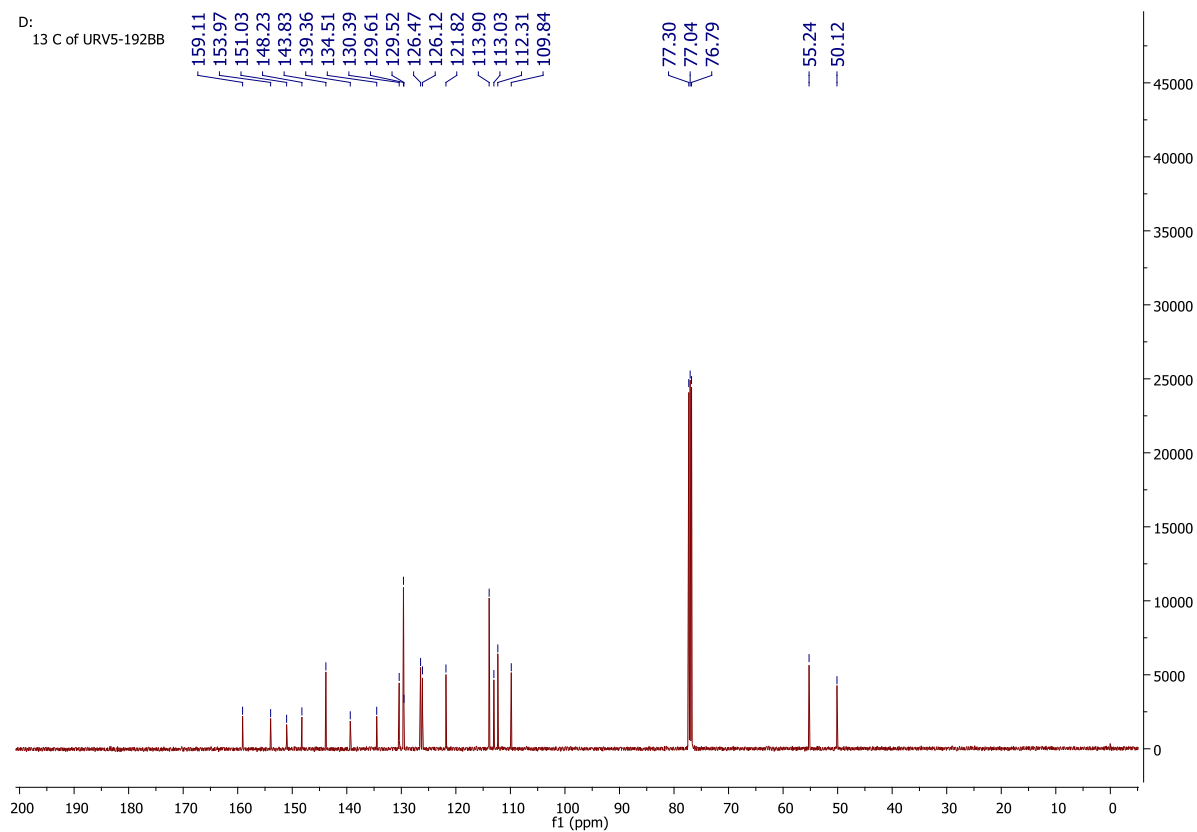

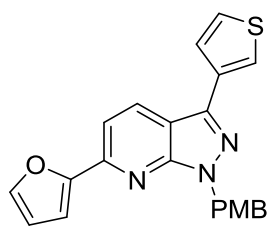

6-(furan-2-yl)-1-(4-methoxybenzyl)-3-(thiophen-3-yl)-1*H*-pyrazolo[3,4-*b*]pyridine (**4i**)

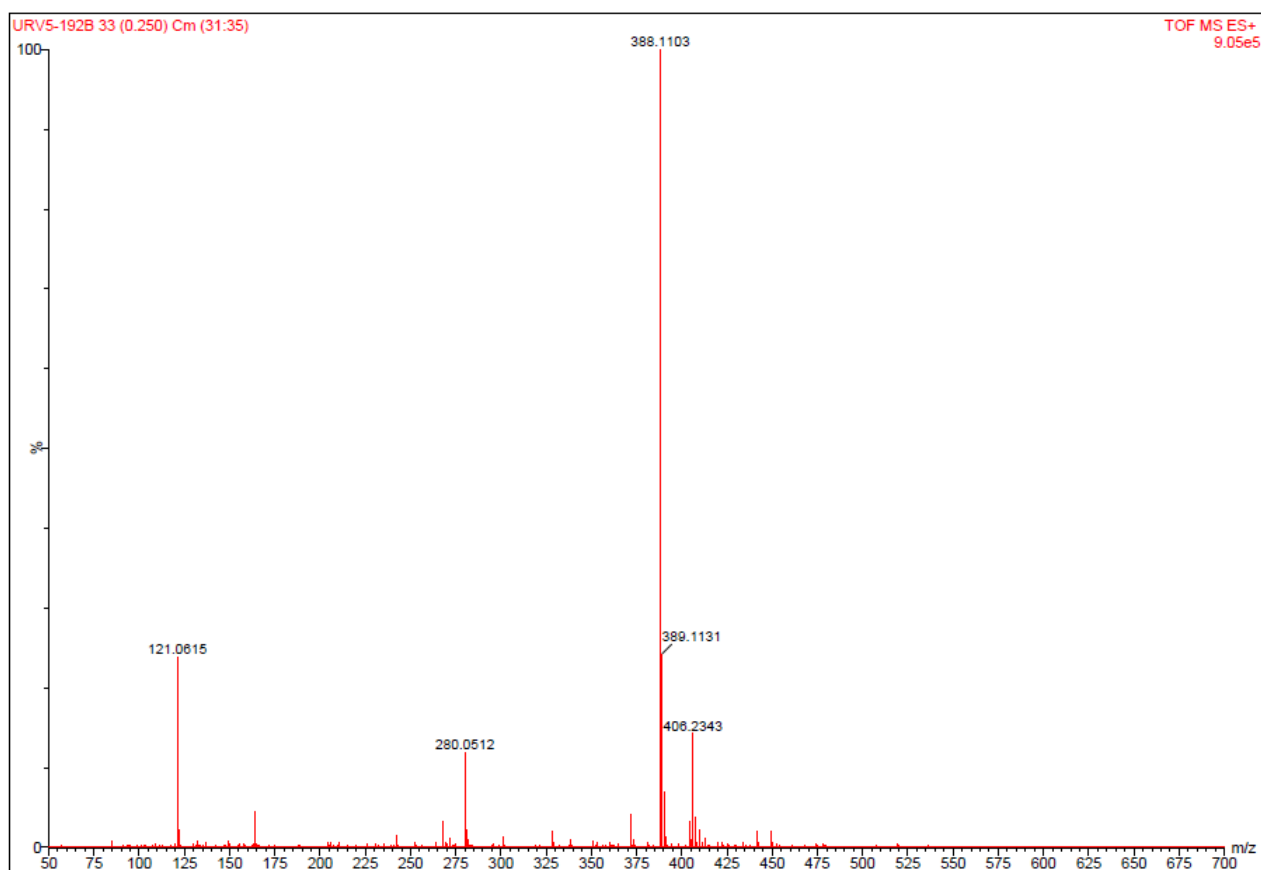

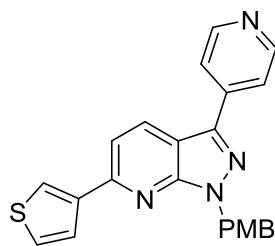

1-(4-methoxybenzyl)-3-(pyridin-4-yl)-6-(thiophen-3-yl)-1*H*-pyrazolo[3,4-*b*]pyridine (**4j**)

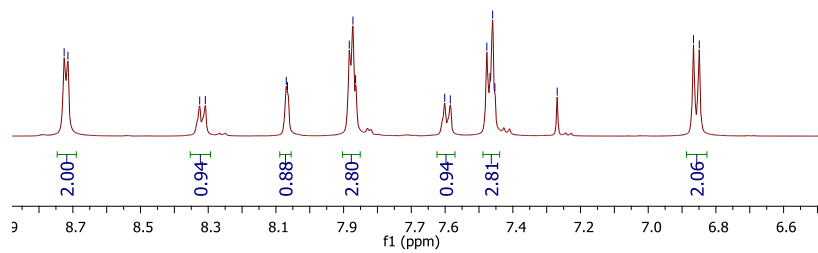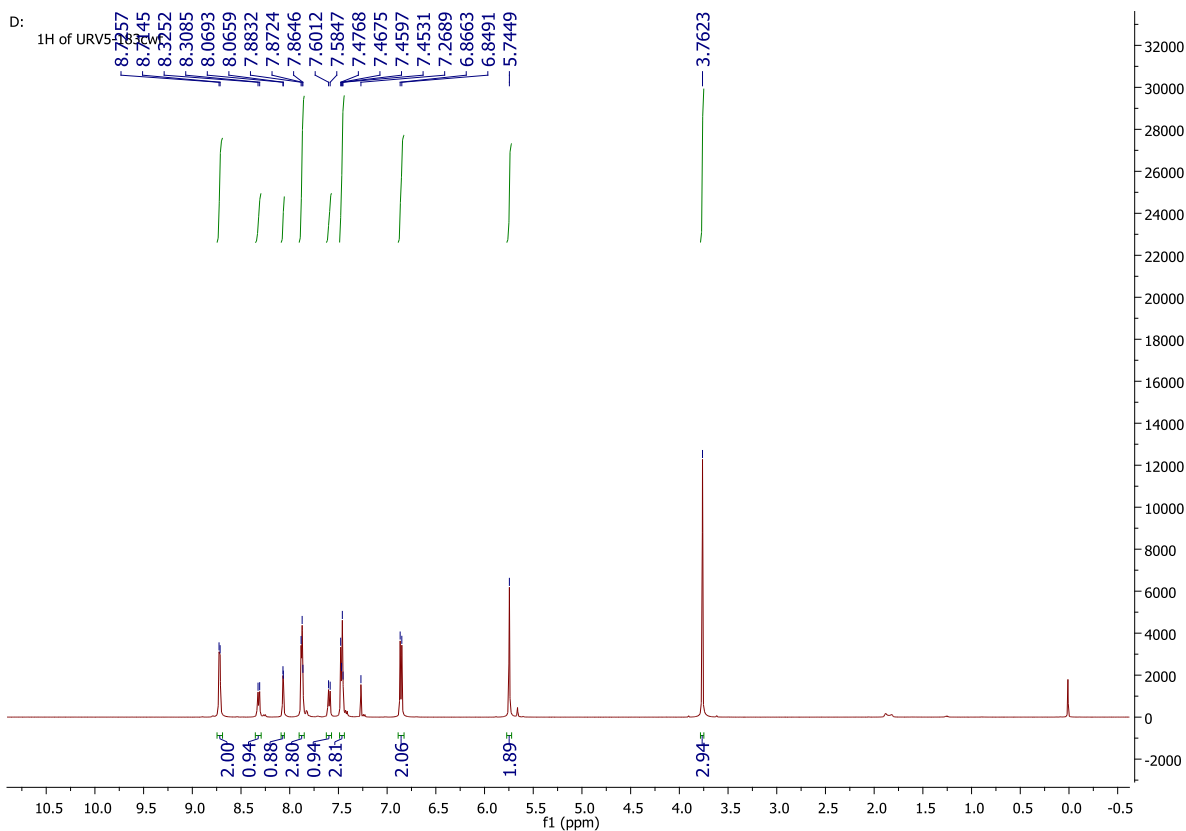

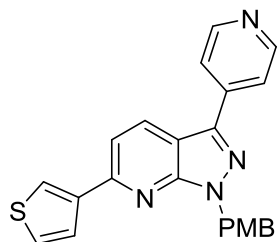

1-(4-methoxybenzyl)-3-(pyridin-4-yl)-6-(thiophen-3-yl)-1*H*-pyrazolo[3,4-*b*]pyridine (**4j**)

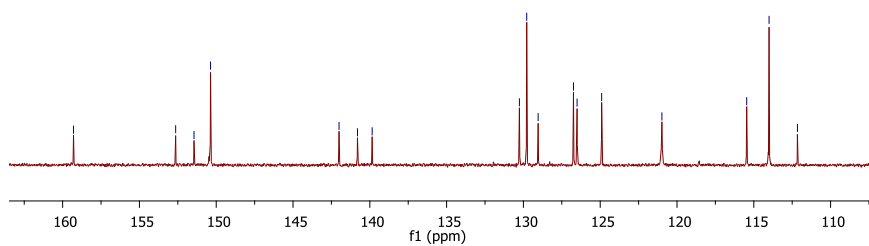

D:  
13 C of URV5-183CWP

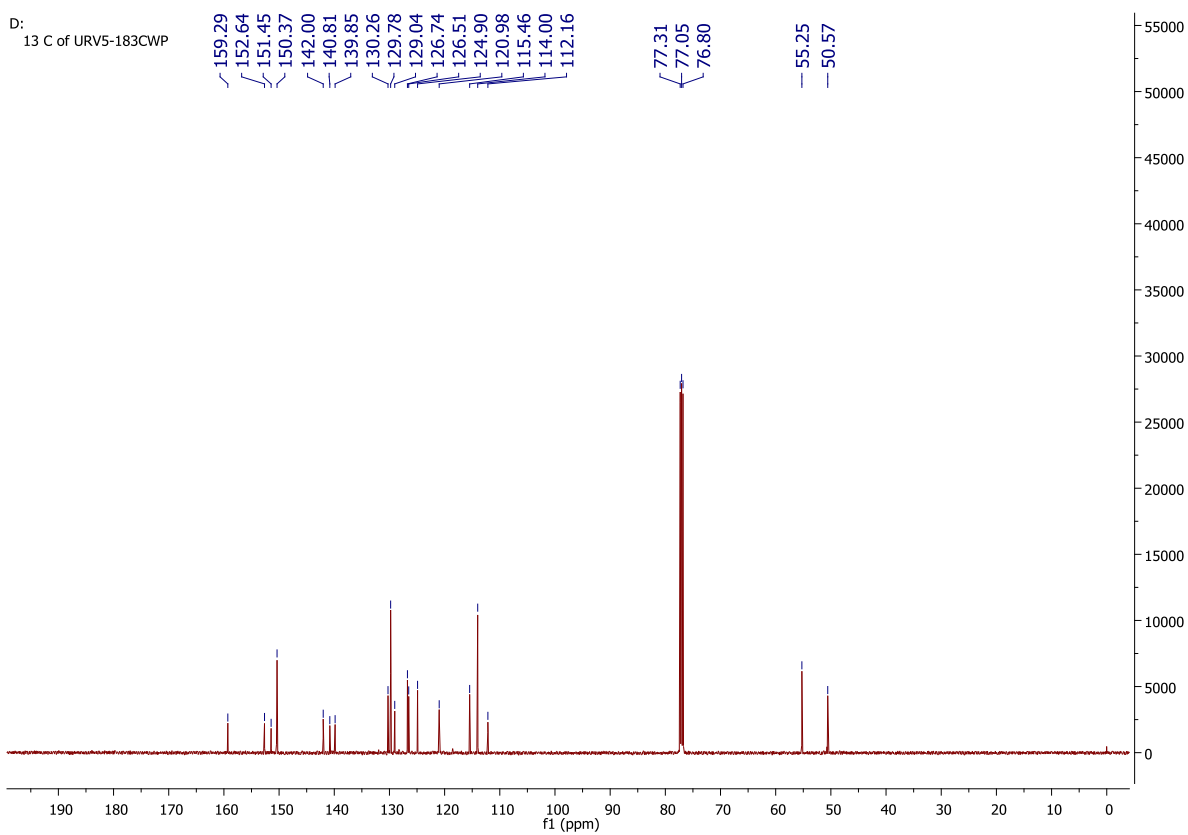



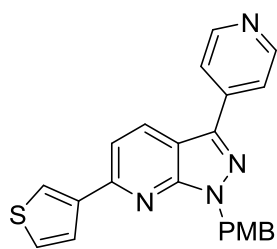

1-(4-methoxybenzyl)-3-(pyridin-4-yl)-6-(thiophen-3-yl)-1*H*-pyrazolo[3,4-*b*]pyridine (**4j**)

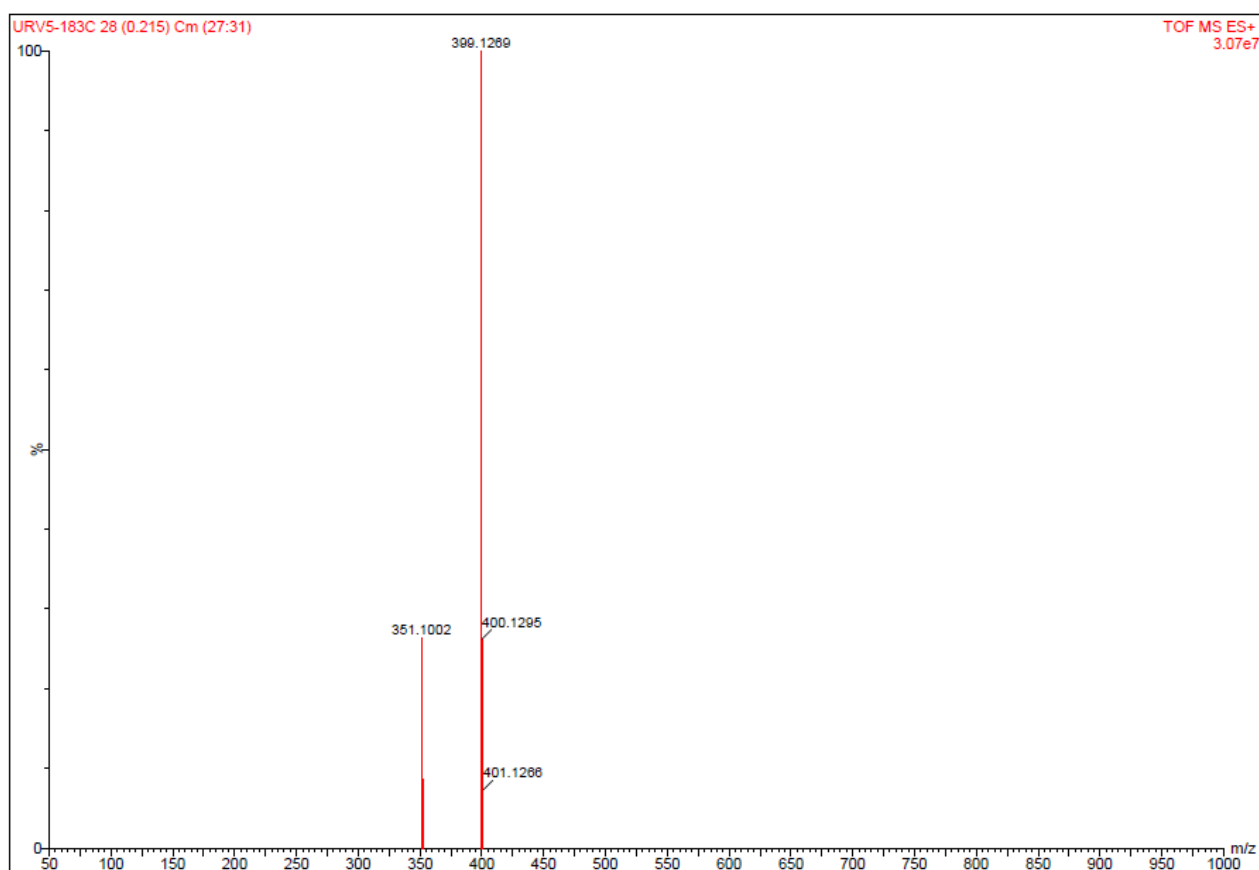

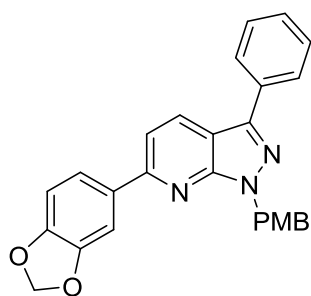

6-(benzo[d][1,3]dioxol-5-yl)-1-(4-methoxybenzyl)-3-phenyl-1*H*-pyrazolo[3,4-*b*]pyridine  
(4k)

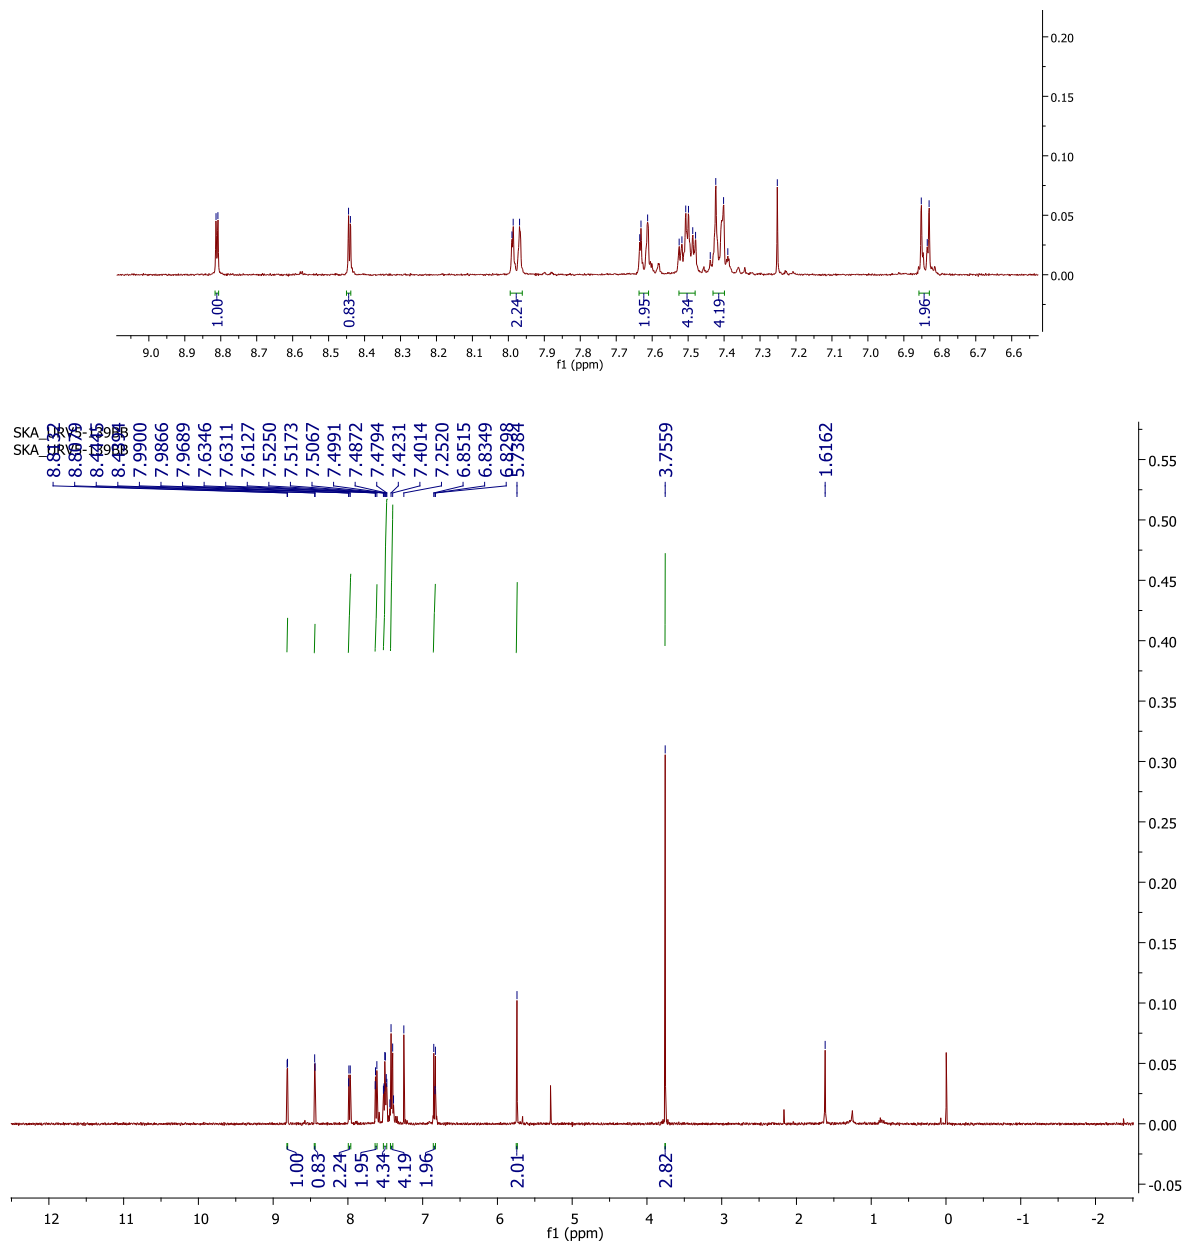

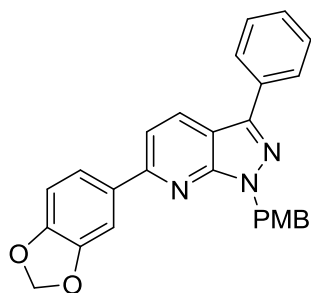

6-(benzo[d][1,3]dioxol-5-yl)-1-(4-methoxybenzyl)-3-phenyl-1*H*-pyrazolo[3,4-*b*]pyridine  
(4k)

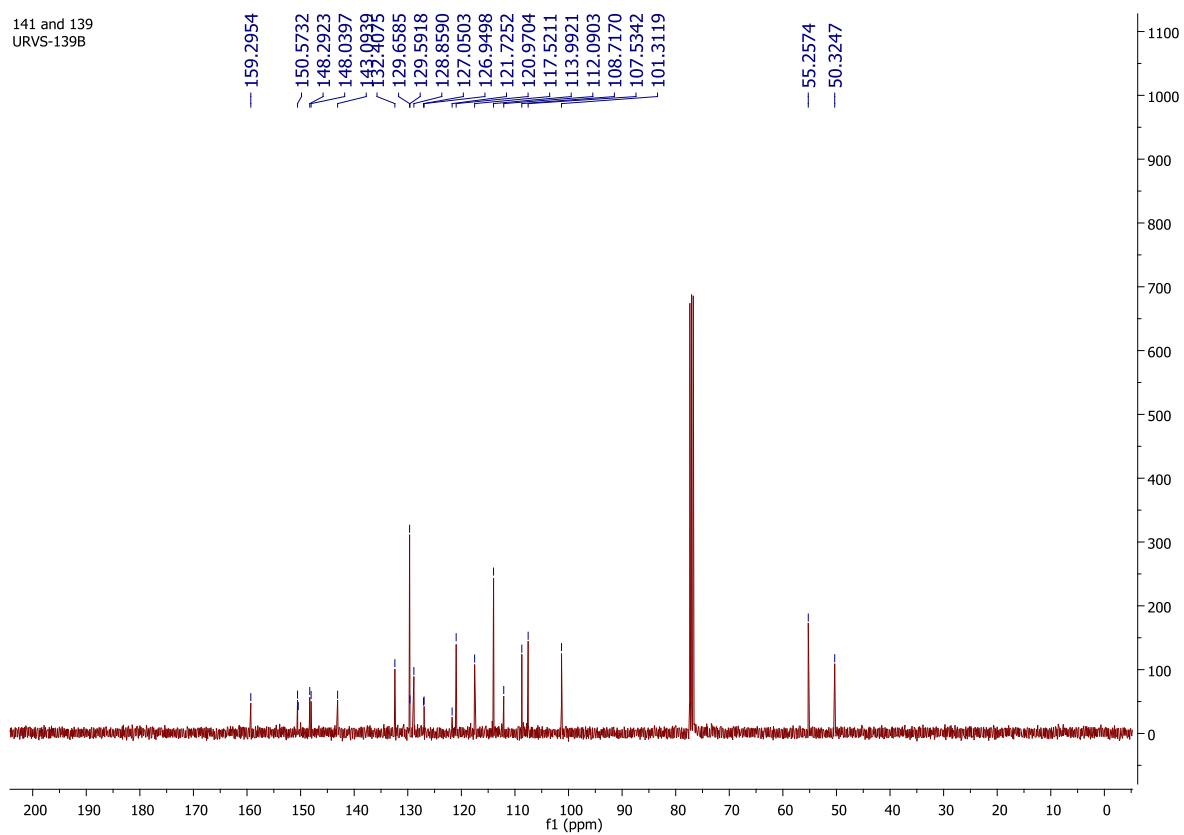

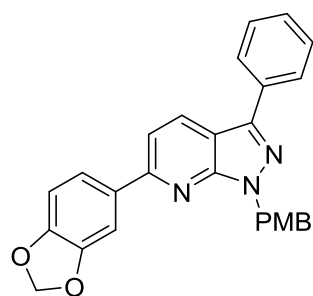

6-(benzo[d][1,3]dioxol-5-yl)-1-(4-methoxybenzyl)-3-phenyl-1*H*-pyrazolo[3,4-*b*]pyridine  
(**4k**)

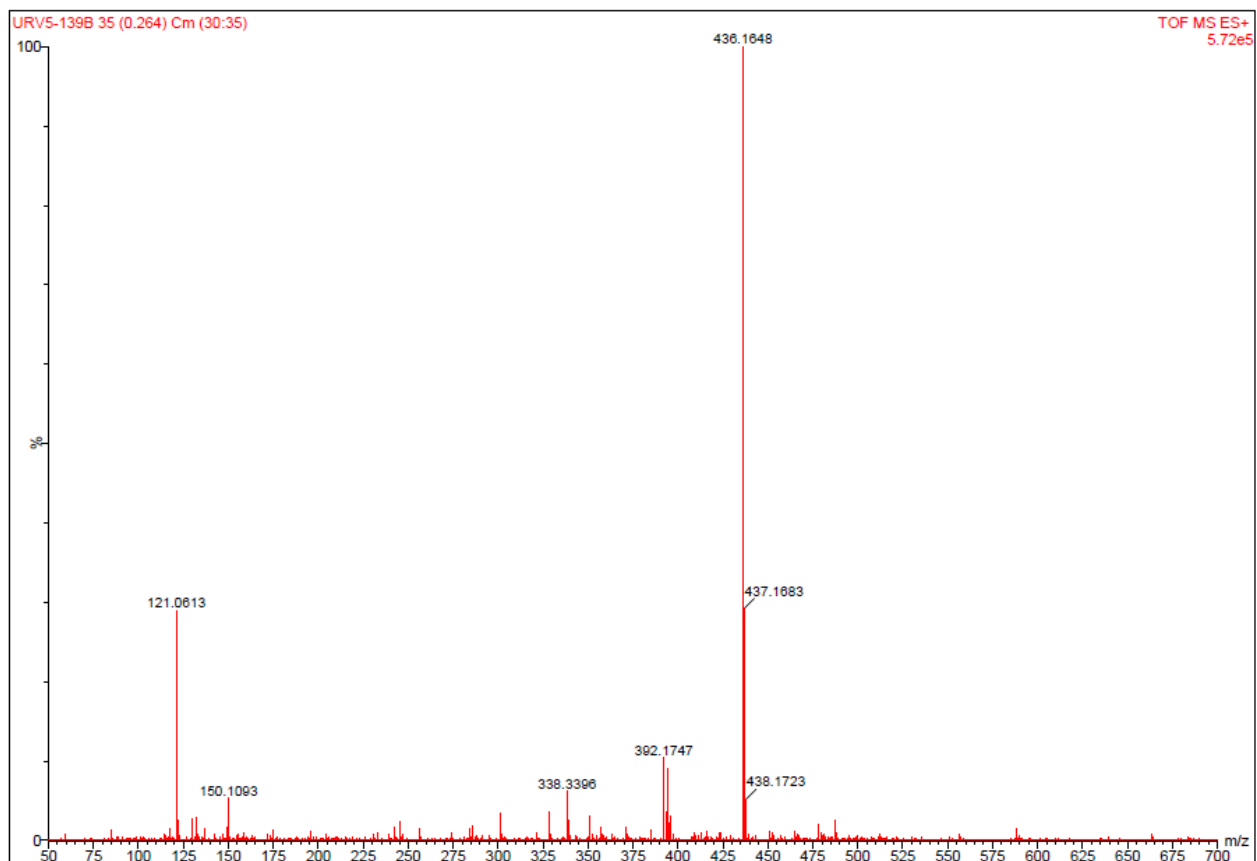

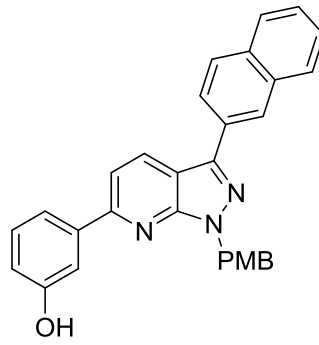

3-(1-(4-methoxybenzyl)-3-(naphthalen-2-yl)-1H-pyrazolo[3,4-b]pyridin-6-yl)phenol (**41**)

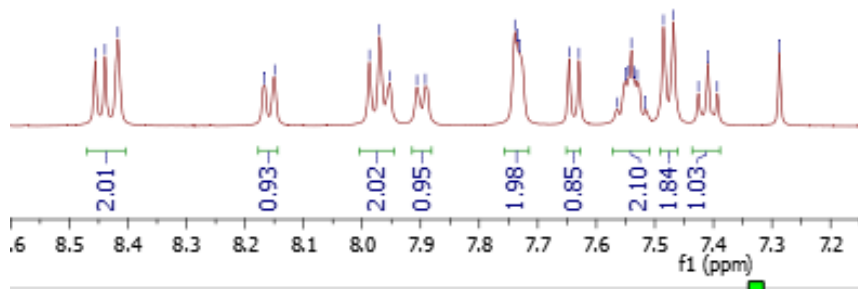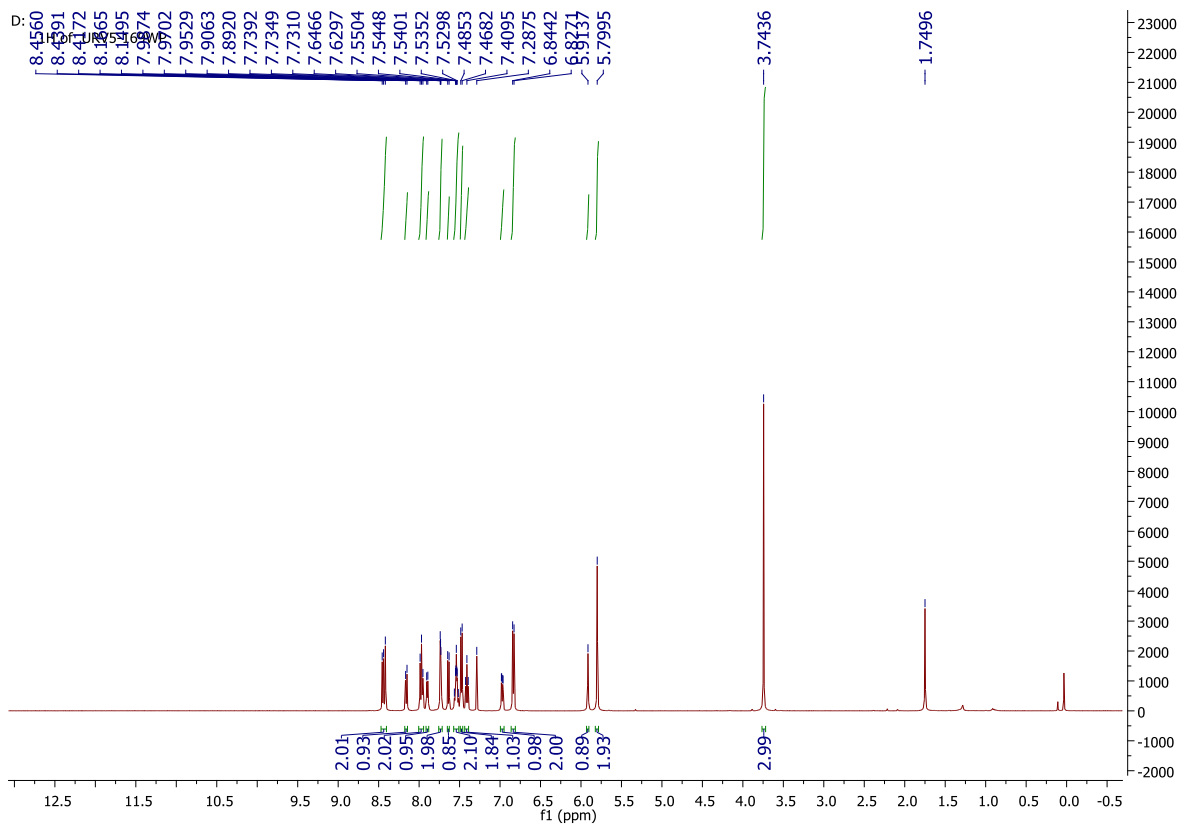



3-(1-(4-methoxybenzyl)-3-(naphthalen-2-yl)-1*H*-pyrazolo[3,4-*b*]pyridin-6-yl)phenol (**41**)

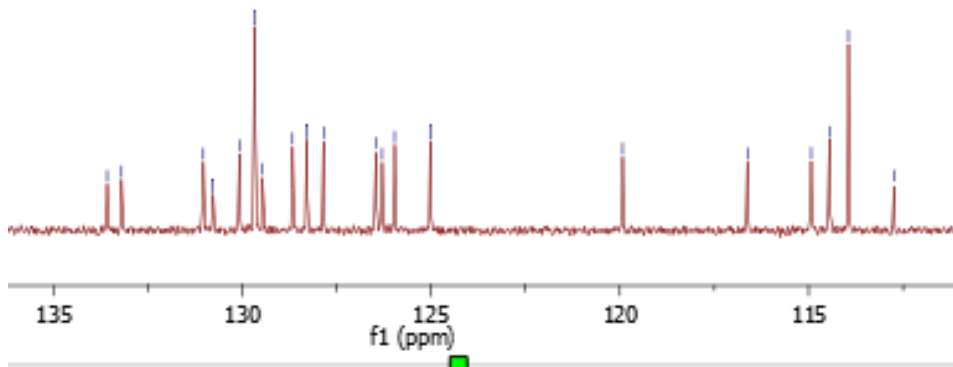

D:  
13 C of urv5-169WP

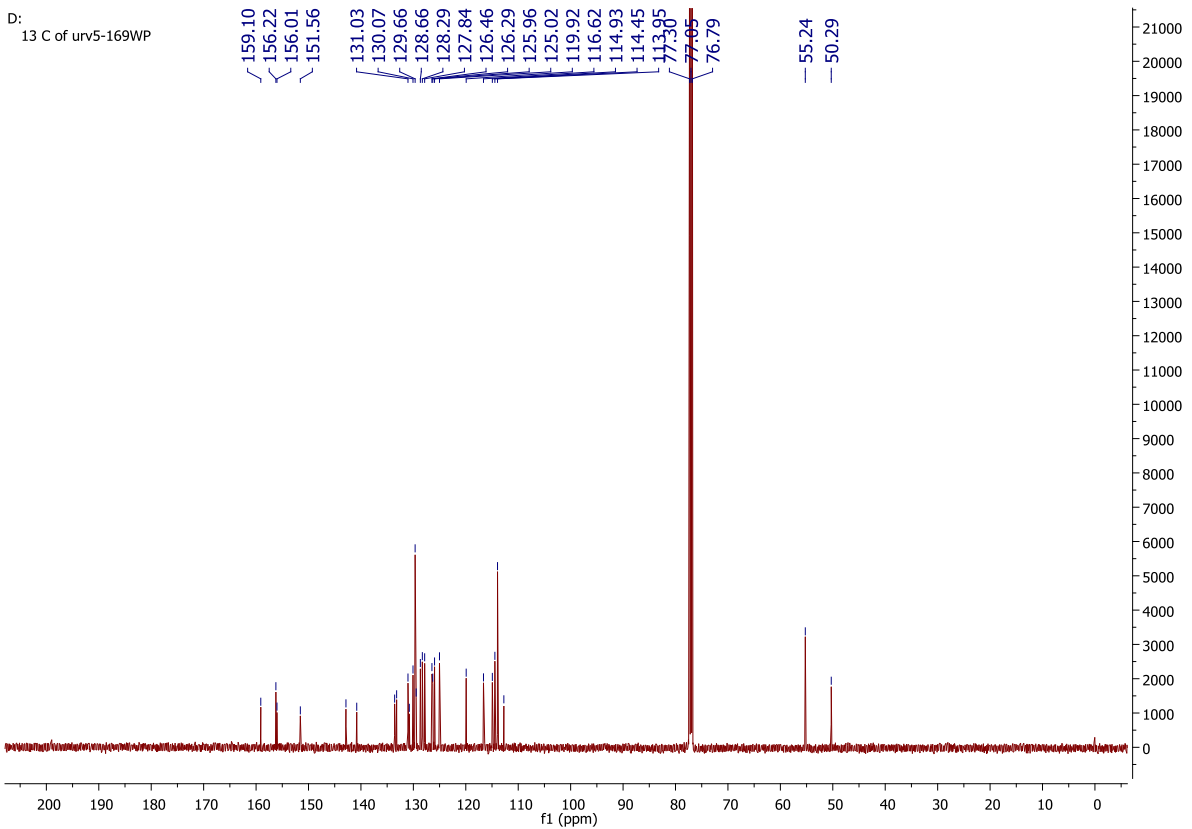



3-(1-(4-methoxybenzyl)-3-(naphthalen-2-yl)-1*H*-pyrazolo[3,4-*b*]pyridin-6-yl)phenol (**4**)

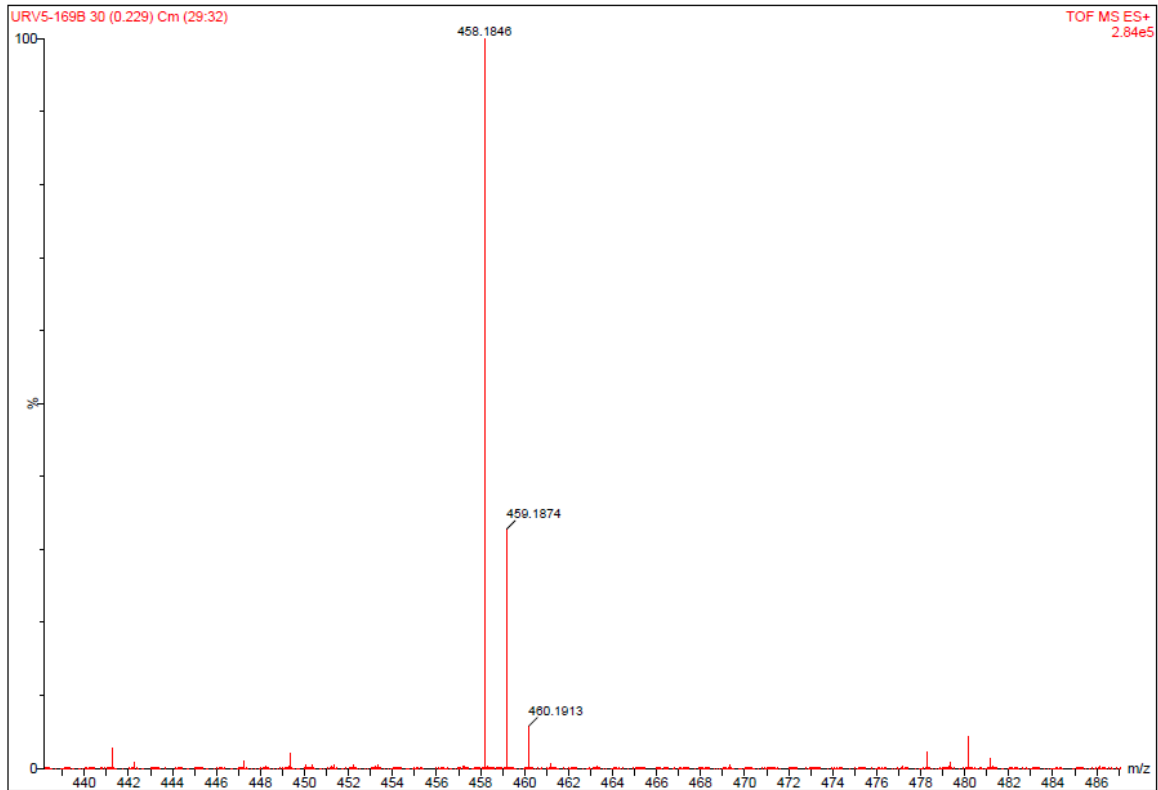

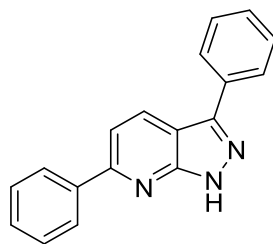

3,6-diphenyl-1H-pyrazolo[3,4-b]pyridine (**5a**)

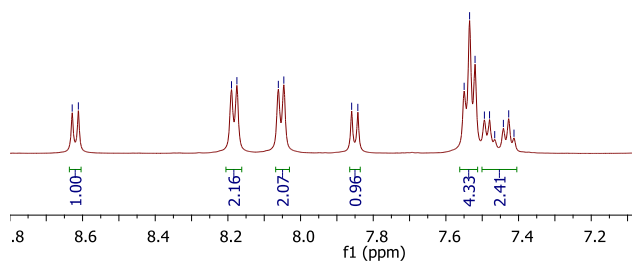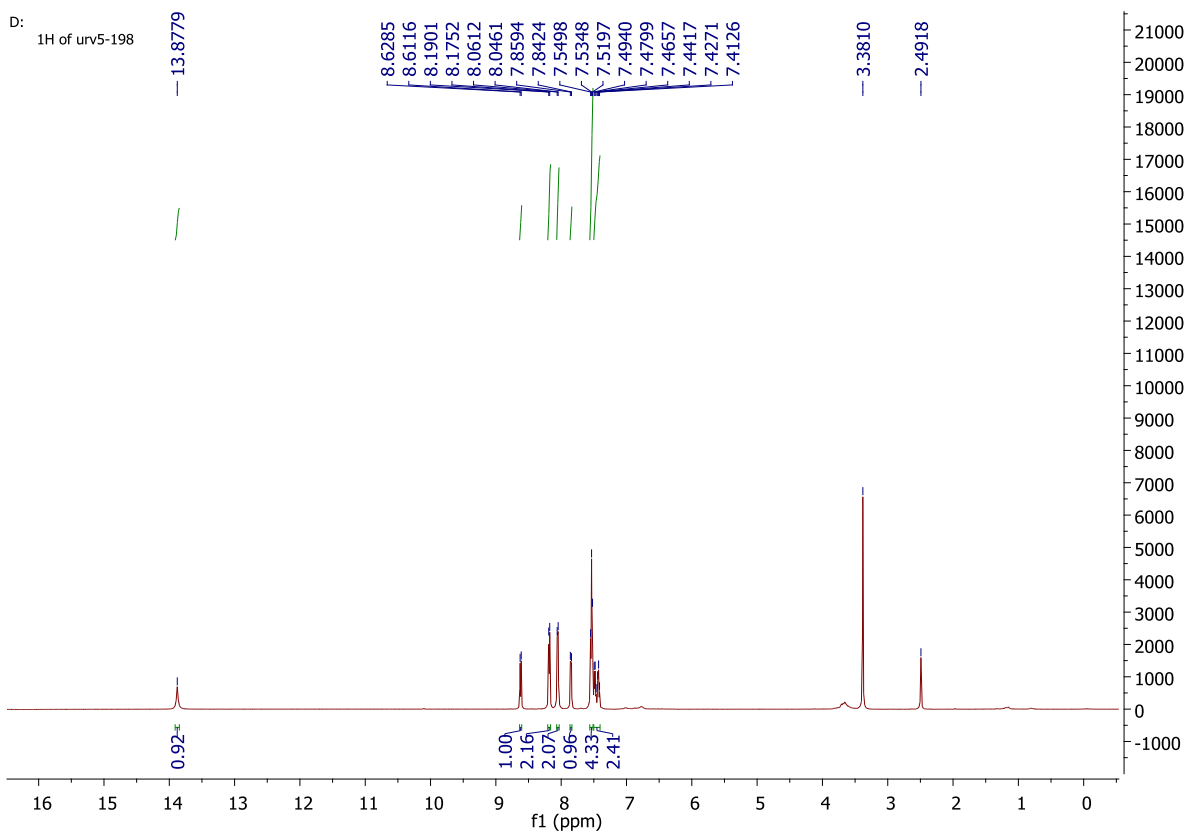





3,6-diphenyl-1*H*-pyrazolo[3,4-*b*]pyridine (**5a**)

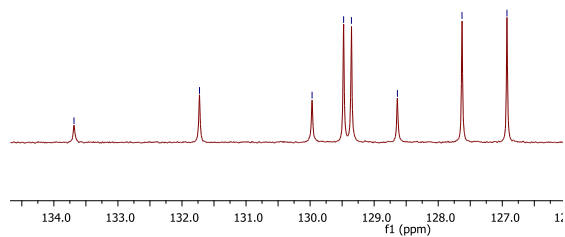

D:  
13 C of urv5-198

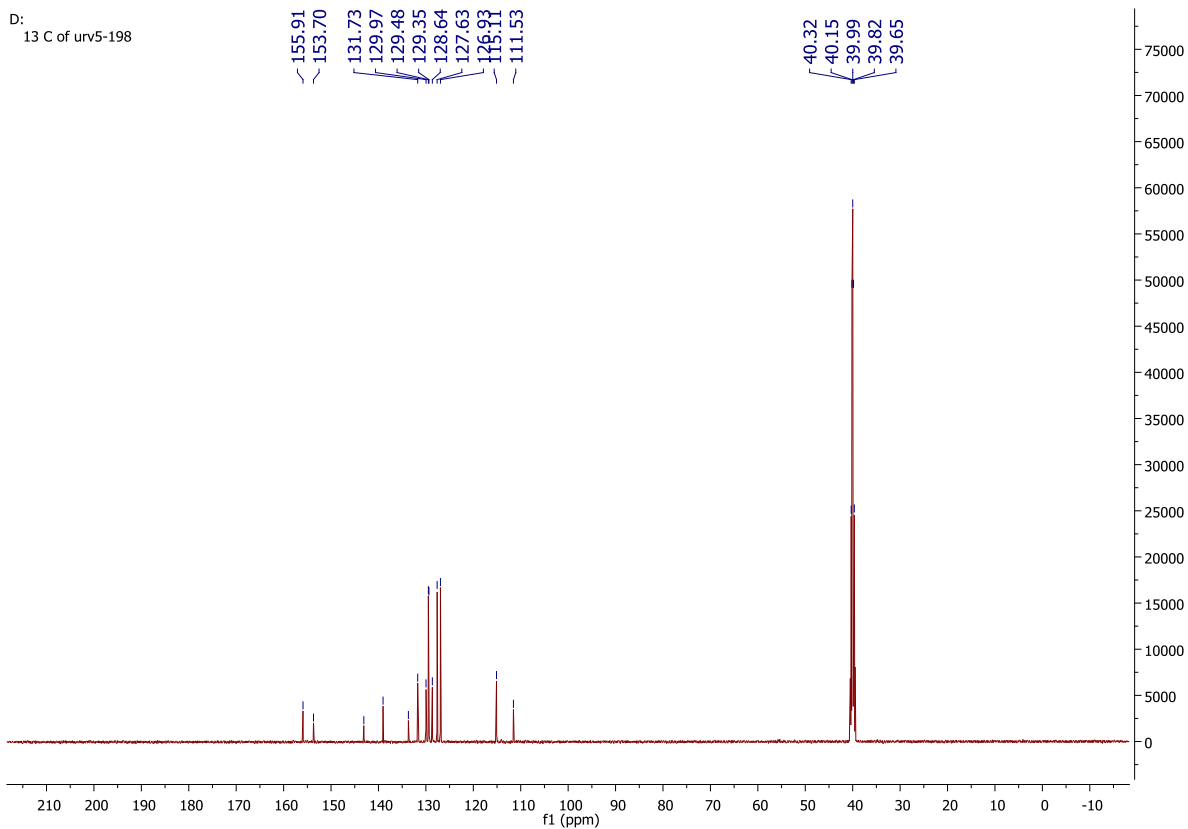

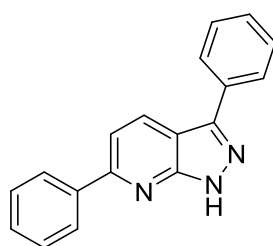

3,6-diphenyl-1*H*-pyrazolo[3,4-*b*]pyridine (**5a**)

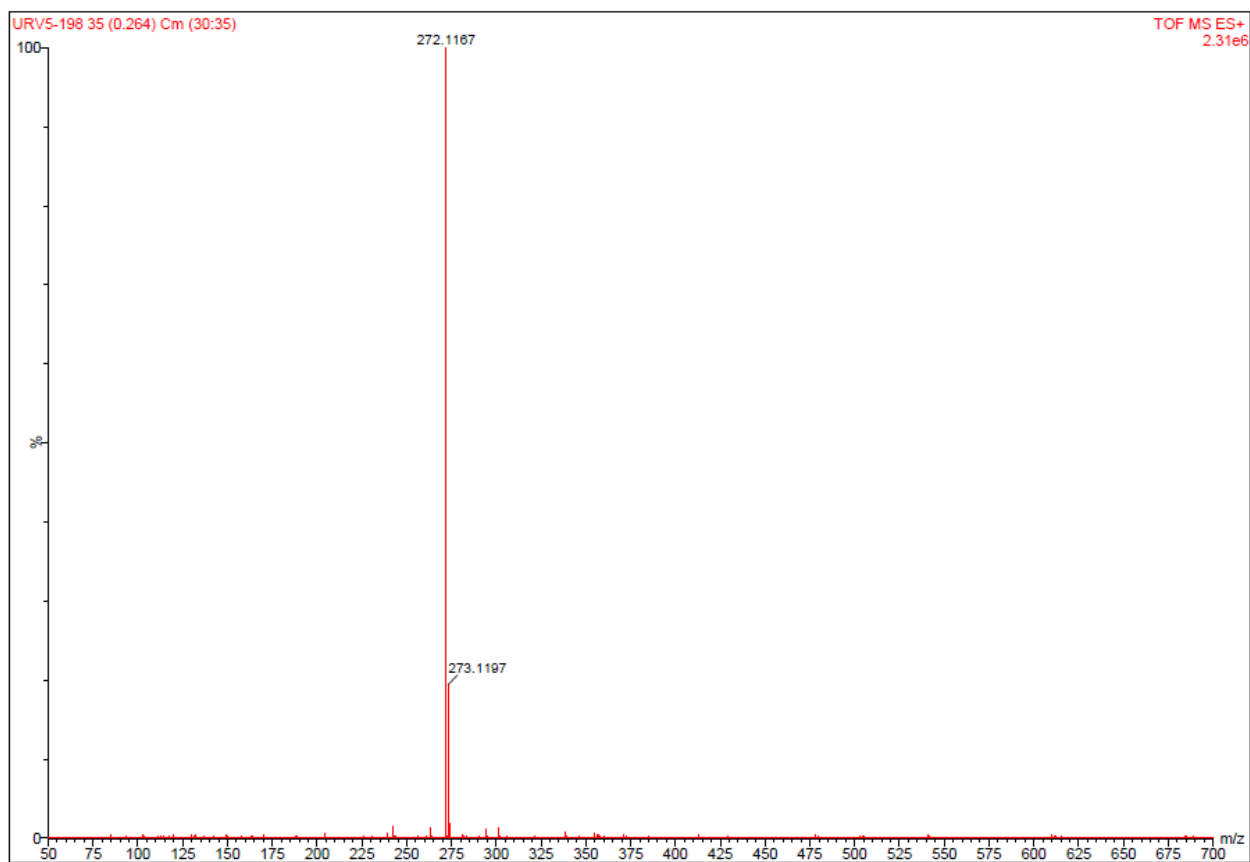

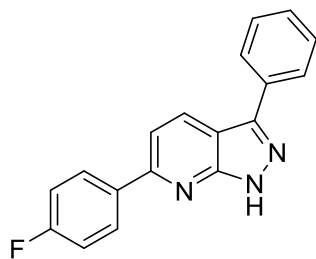

6-(4-fluorophenyl)-3-phenyl-1H-pyrazolo[3,4-*b*]pyridine (**5b**)

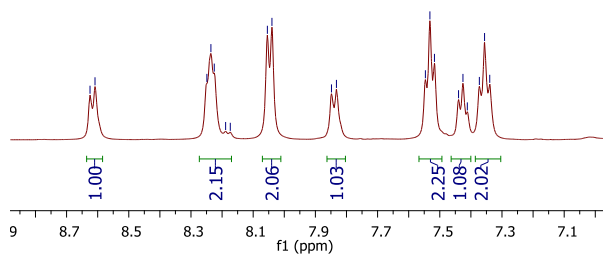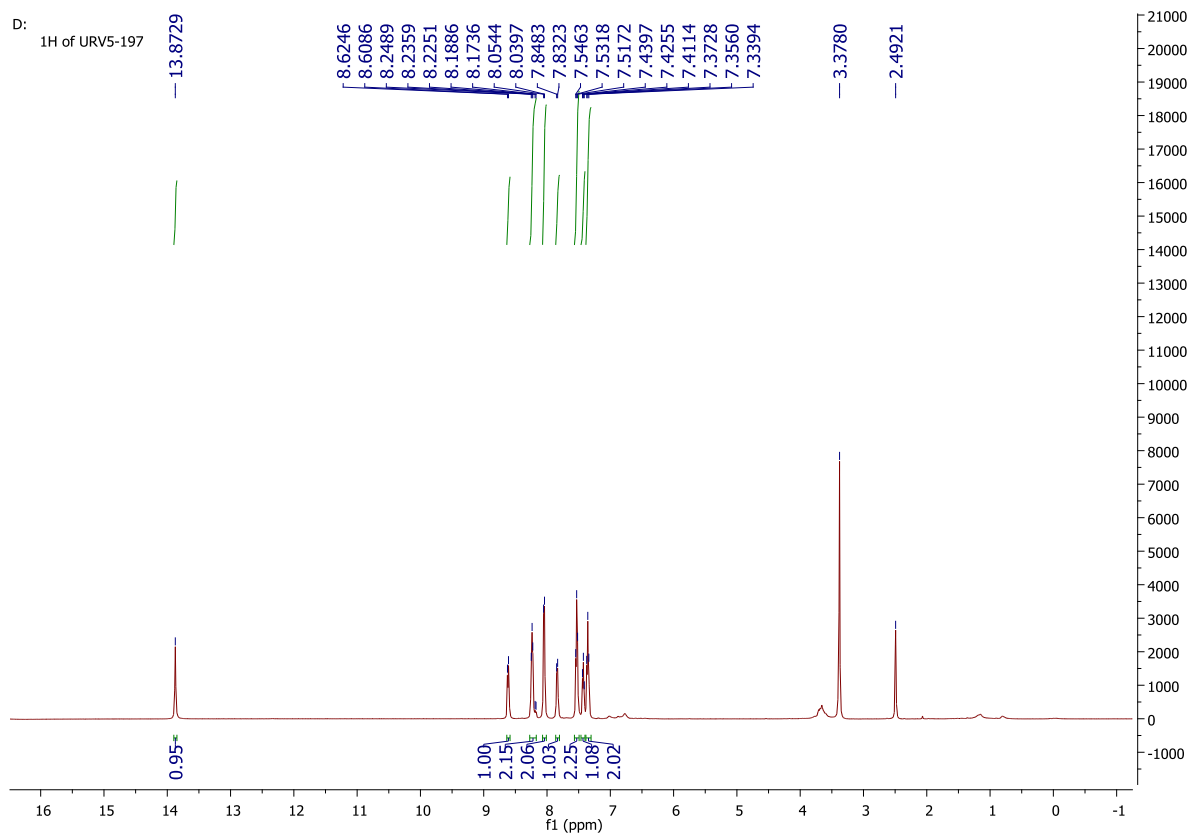

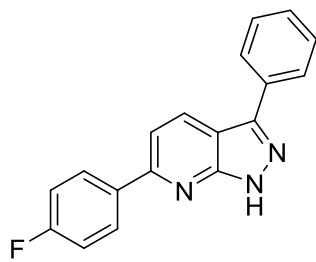

6-(4-fluorophenyl)-3-phenyl-1H-pyrazolo[3,4-b]pyridine (**5b**)

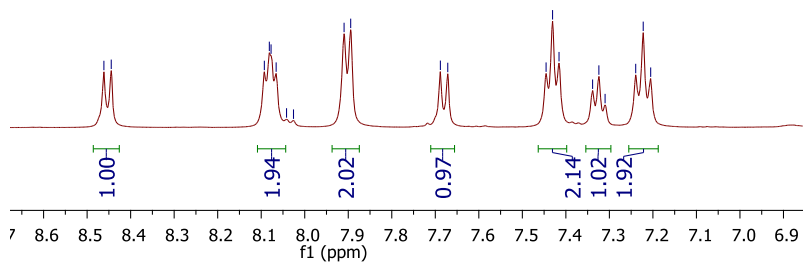

D:  
1 H NMR of URV5-197D2O

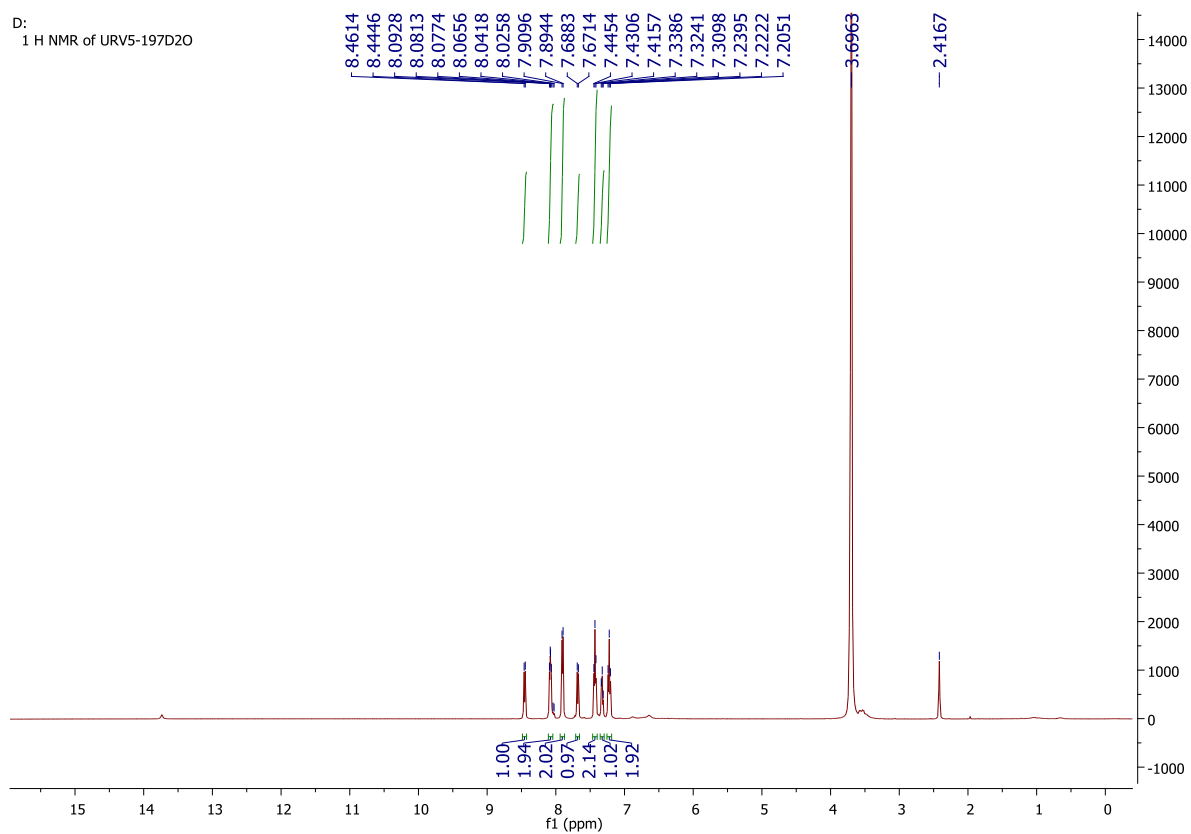



6-(4-fluorophenyl)-3-phenyl-1*H*-pyrazolo[3,4-*b*]pyridine (**5b**)

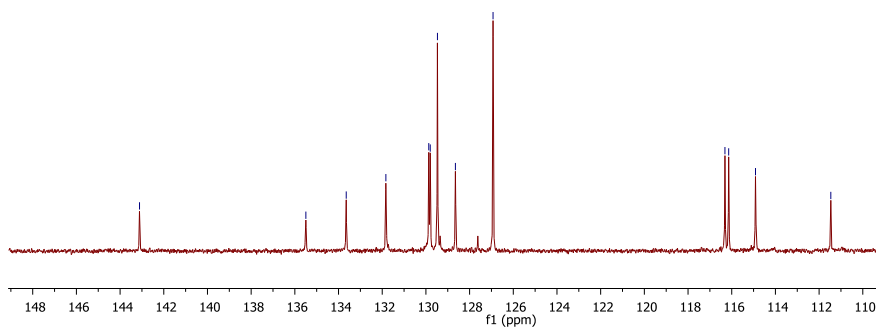

D:  
13 C of urv5-197

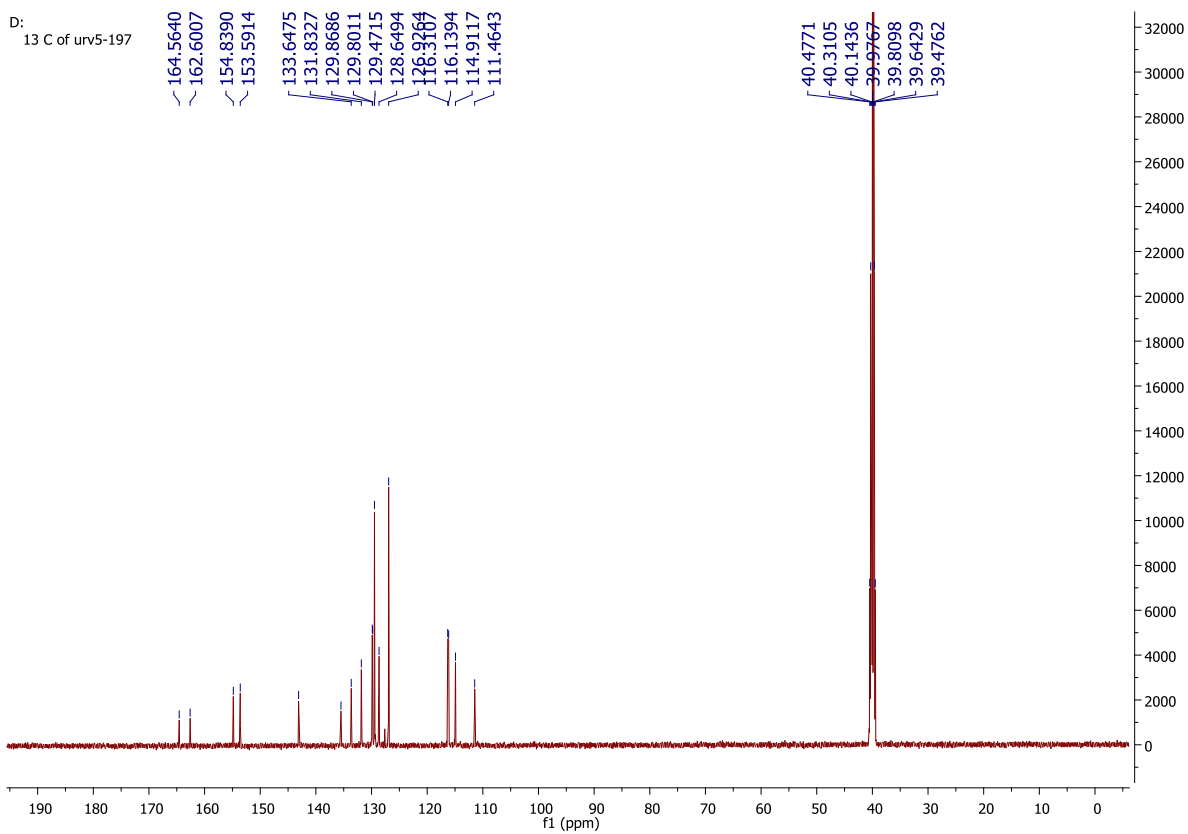

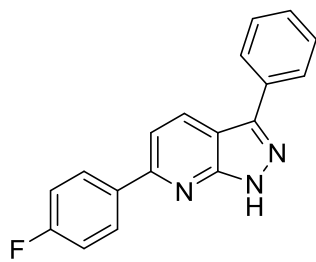

6-(4-fluorophenyl)-3-phenyl-1*H*-pyrazolo[3,4-*b*]pyridine (**5b**)

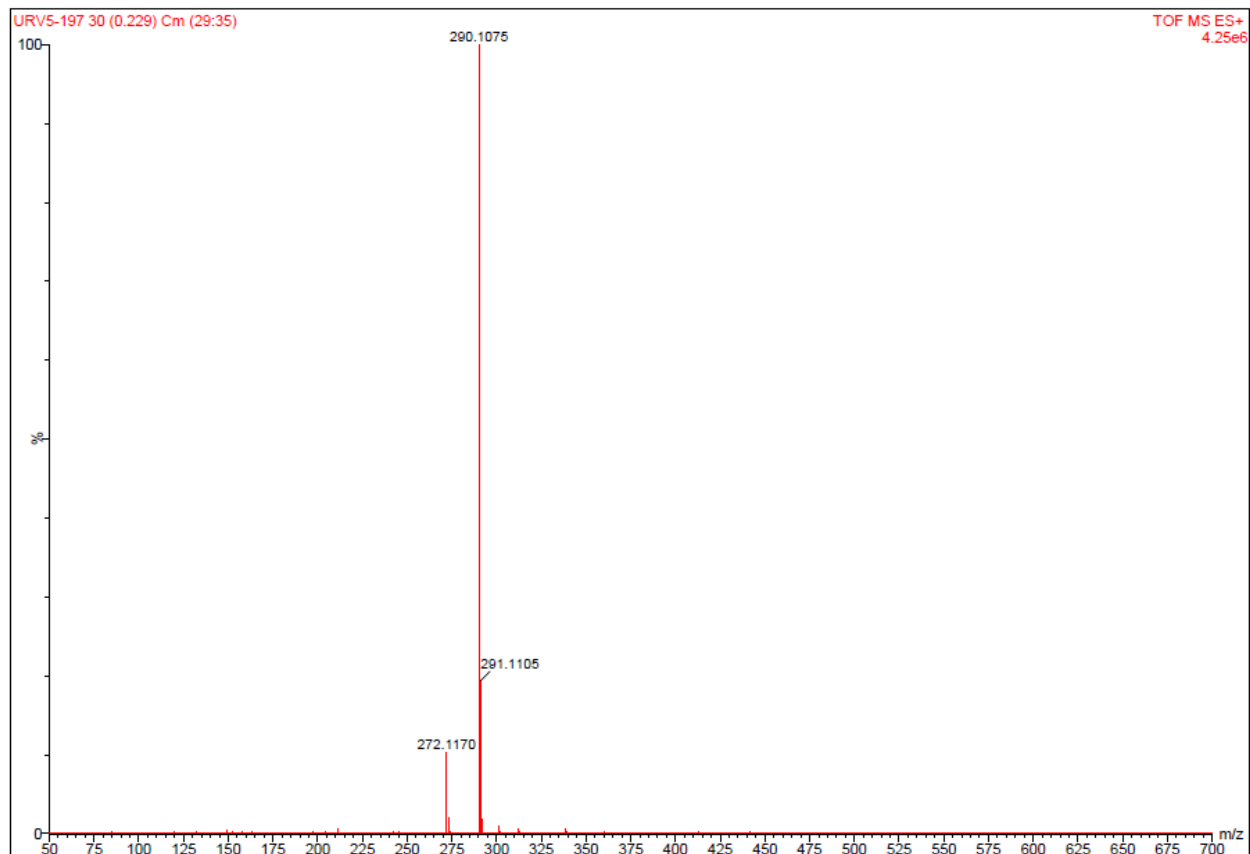

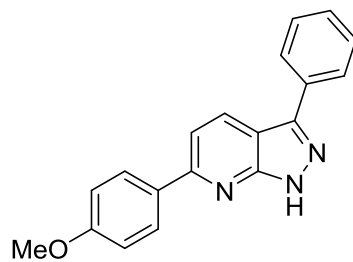

6-(4-methoxyphenyl)-3-phenyl-1*H*-pyrazolo[3,4-*b*]pyridine (**5c**)

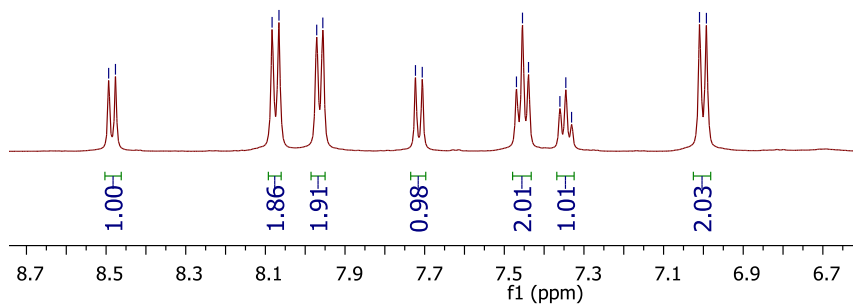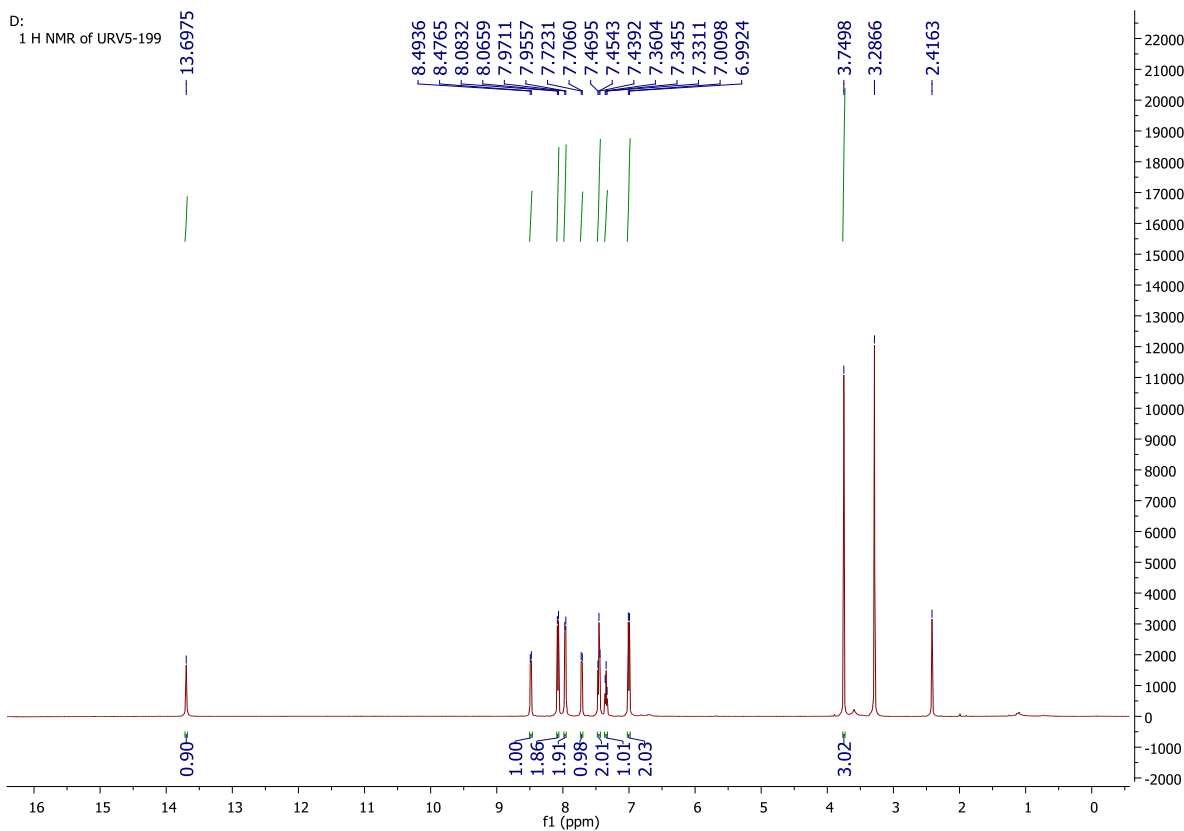

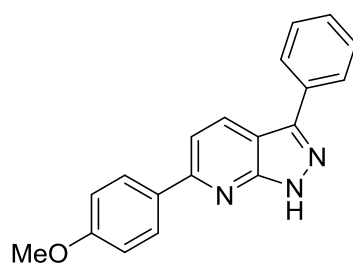

6-(4-methoxyphenyl)-3-phenyl-1*H*-pyrazolo[3,4-*b*]pyridine (**5c**)

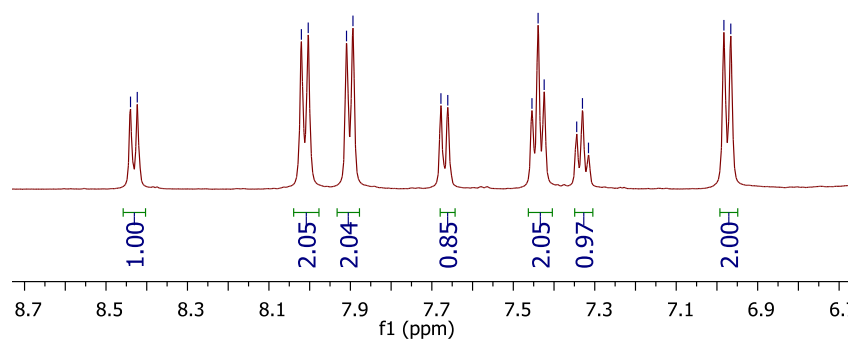

D:  
1 H NMR of URV5-199D20

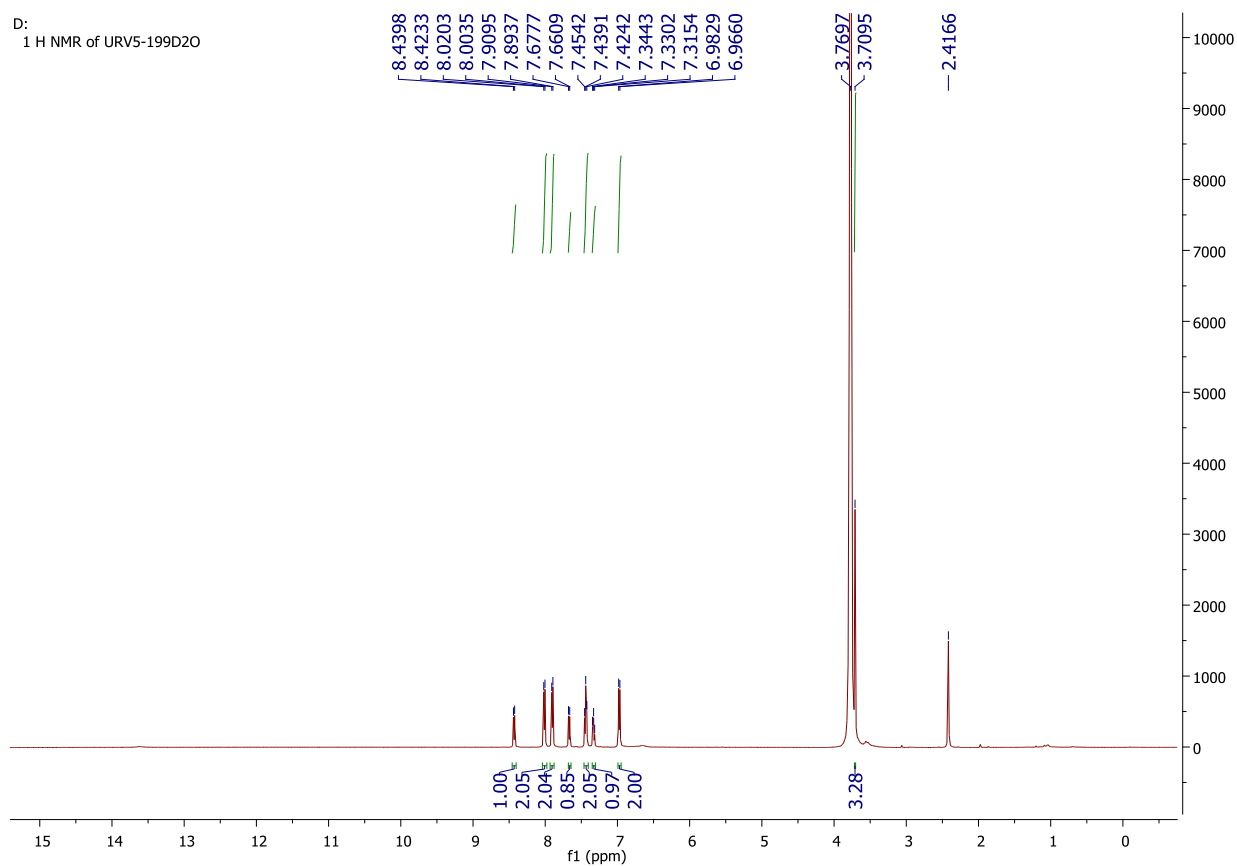



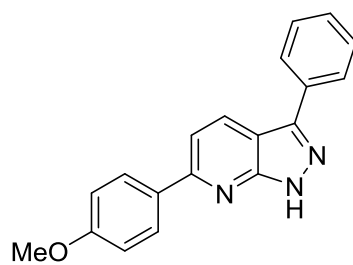

6-(4-methoxyphenyl)-3-phenyl-1*H*-pyrazolo[3,4-*b*]pyridine (**5c**)

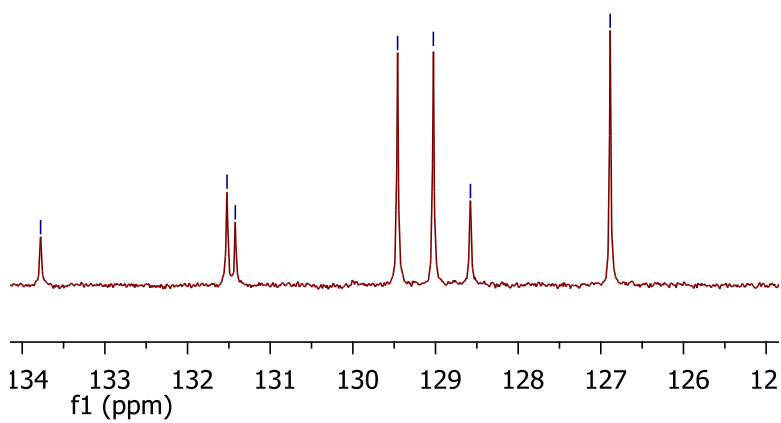

D:  
13 C of urv5-199

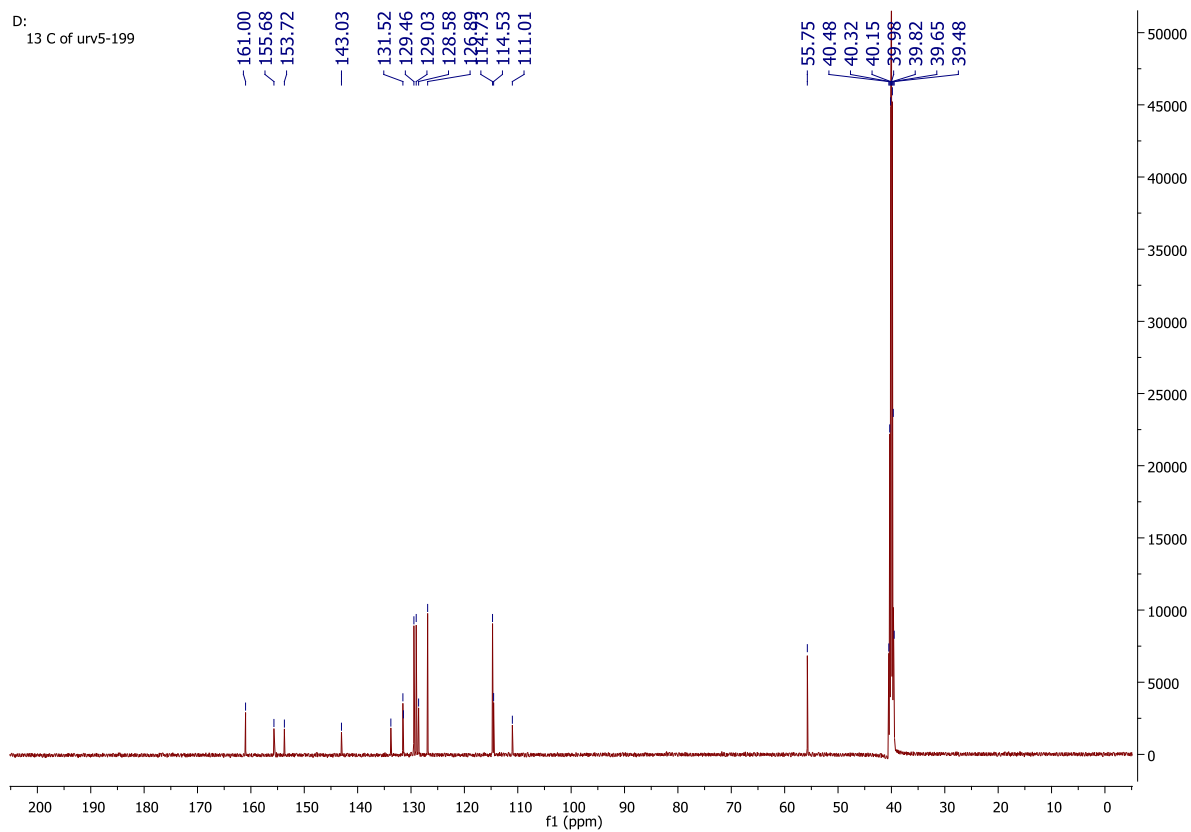

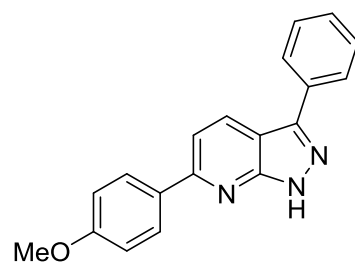

6-(4-methoxyphenyl)-3-phenyl-1*H*-pyrazolo[3,4-*b*]pyridine (**5c**)

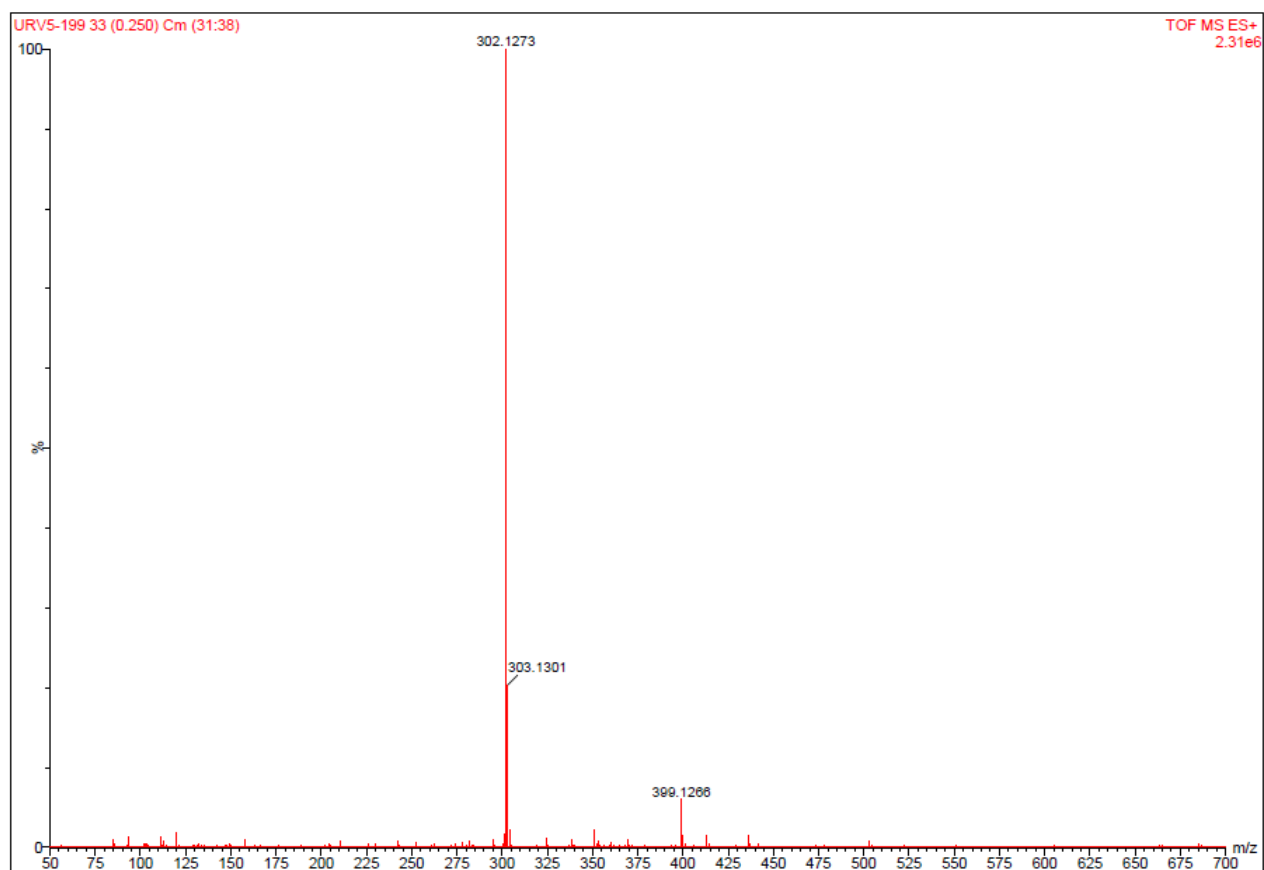

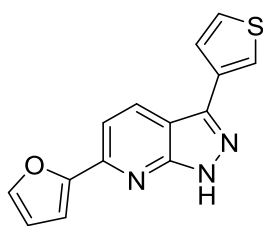

6-(furan-2-yl)-3-(thiophen-3-yl)-1H-pyrazolo[3,4-b]pyridine (**5d**)

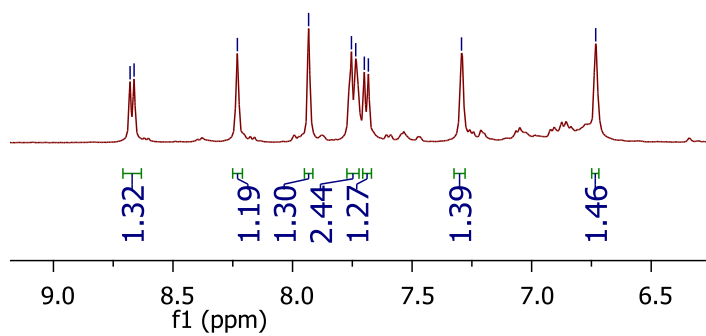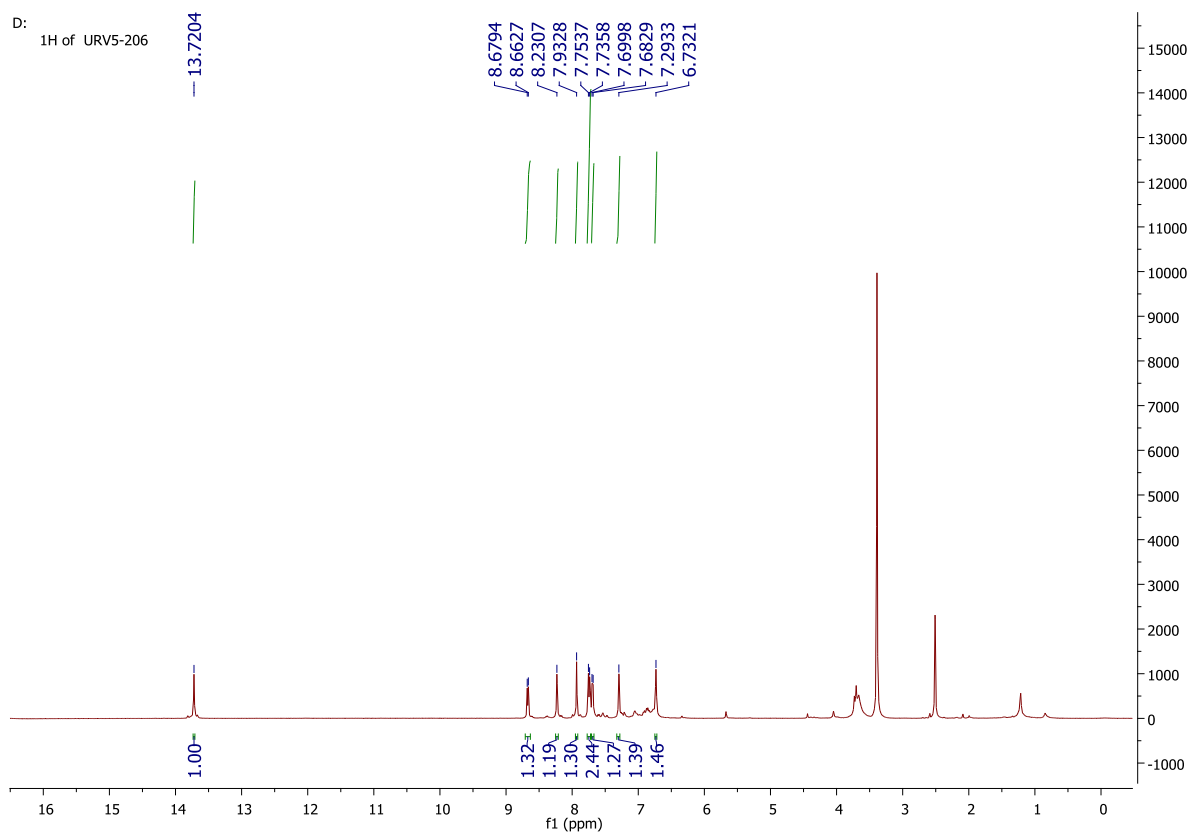

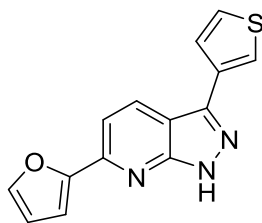

6-(furan-2-yl)-3-(thiophen-3-yl)-1*H*-pyrazolo[3,4-*b*]pyridine (**5d**)

D:  
13 C urv5-206

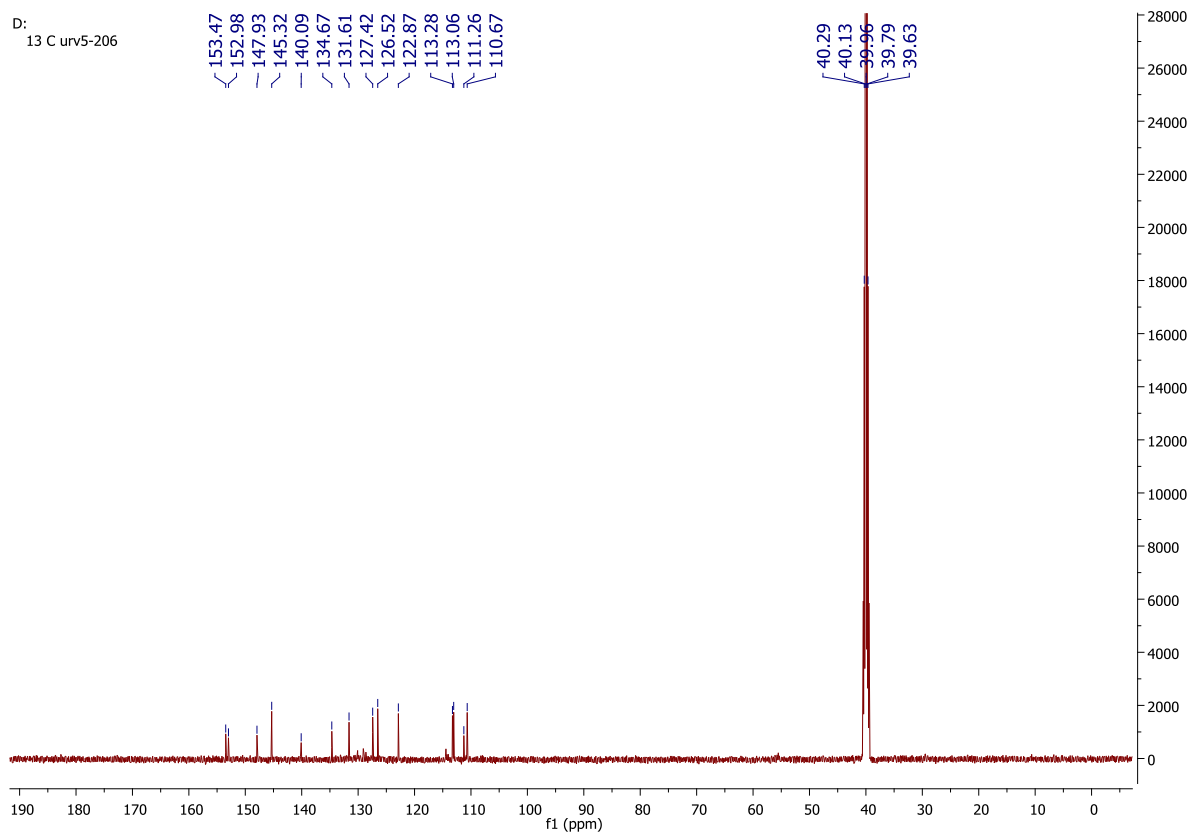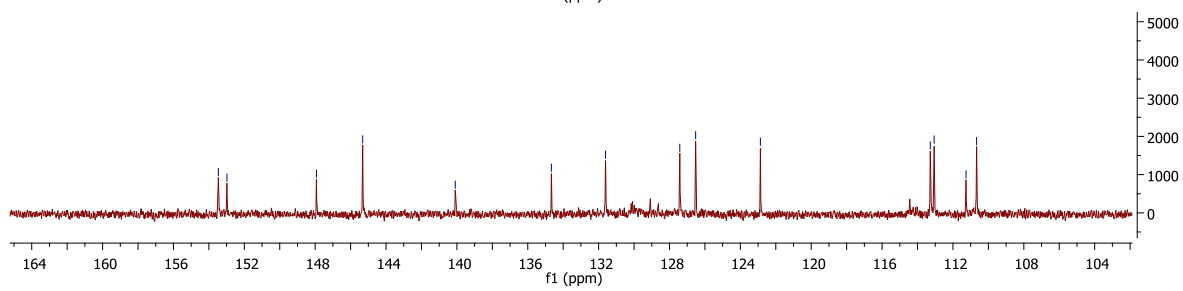



6-(furan-2-yl)-3-(thiophen-3-yl)-1*H*-pyrazolo[3,4-*b*]pyridine (**5d**)

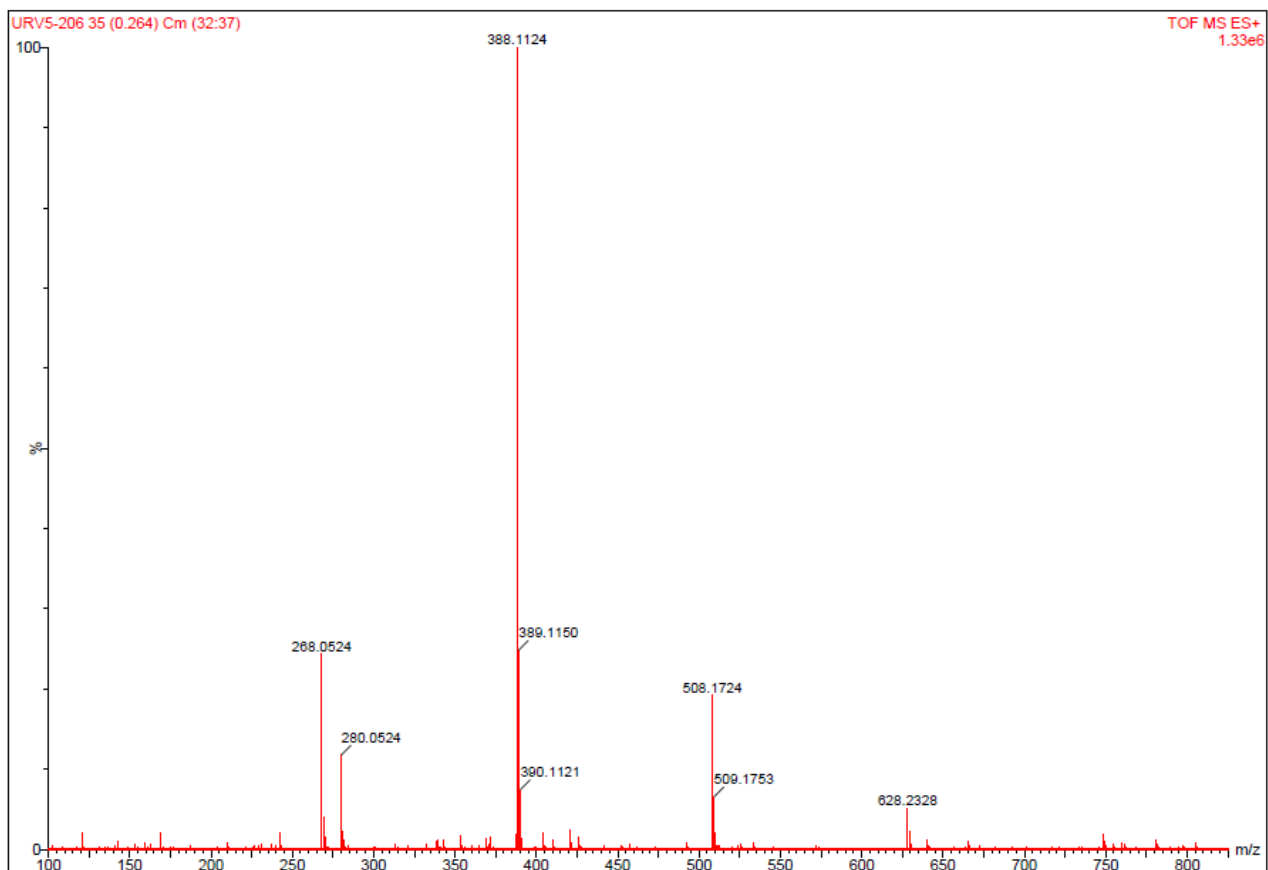

Supplement: c8ra07104g1.pdf [file c8ra07104g1.pdf]
